# Supplementary material for: Bamboo charcoal mediated plant secondary metabolites biosynthesis in tomato against South American tomato pinworm (Tuta absoluta)
Source: Frontiers journal article supplement (doi:10.3389/fsufs.2023.1101151), 2023-02-06
Supplement: Data_Sheet_5.xlsx [file Data_Sheet_5.xlsx]

## Sheet: Table S5
Supplementary Table 3. List of genes associated with different KEGG pathways that showed changes in the ex-pression between leaves grown in CK (100% coconut bran) and BC (30:1 v/v coconut bran and bamboo charcoal).
ID	CK	BC	log2FC	KEGG	KEGG pathway
Solyc12g056130.2	1.56667	1.68	0.100763	K00033 6-phosphogluconate dehydrogenase [EC:1.1.1.44 1.1.1.343] | (RefSeq) 6-phosphogluconate dehydrogenase, decarboxylating 2, chloroplastic (A)	ko00030: Pentose phosphate pathway; ko00480: Glutathione metabolism; ko01100: Metabolic pathways; ko01110: Biosynthesis of secondary metabolites; ko01200: Carbon metabolism
Solyc01g100960.3	4.15667	4.78	0.201584	K00036 glucose-6-phosphate 1-dehydrogenase [EC:1.1.1.49 1.1.1.363] | (RefSeq) glucose-6-phosphate 1-dehydrogenase 4, chloroplastic (A)	ko00030: Pentose phosphate pathway; ko00480: Glutathione metabolism; ko01100: Metabolic pathways; ko01110: Biosynthesis of secondary metabolites; ko01200: Carbon metabolism
Solyc07g045540.3	44.08	47.32	0.102326	K00036 glucose-6-phosphate 1-dehydrogenase [EC:1.1.1.49 1.1.1.363] | (RefSeq) glucose-6-phosphate 1-dehydrogenase, chloroplastic (A)	ko00030: Pentose phosphate pathway; ko00480: Glutathione metabolism; ko01100: Metabolic pathways; ko01110: Biosynthesis of secondary metabolites; ko01200: Carbon metabolism
Solyc06g005160.3	741.4	746.23	0.00936825	K00434 L-ascorbate peroxidase [EC:1.11.1.11] | (RefSeq) APX1; cytosolic ascorbate peroxidase 1 (A)	ko00053: Ascorbate and aldarate metabolism; ko00480: Glutathione metabolism; ko01100: Metabolic pathways
Solyc11g018550.3	65.43	70.23	0.102135	K00434 L-ascorbate peroxidase [EC:1.11.1.11] | (RefSeq) APX6; thylakoid-bound ascorbate peroxidase 6 (A)	ko00053: Ascorbate and aldarate metabolism; ko00480: Glutathione metabolism; ko01100: Metabolic pathways
Solyc06g060260.3	50.9	56.92	0.16127	K00434 L-ascorbate peroxidase [EC:1.11.1.11] | (RefSeq) APX7; stromal ascorbate peroxidase 7 (A)	ko00053: Ascorbate and aldarate metabolism; ko00480: Glutathione metabolism; ko01100: Metabolic pathways
Solyc09g007270.3	2.12	4.94333	1.22142	K00434 L-ascorbate peroxidase [EC:1.11.1.11] | (RefSeq) L-ascorbate peroxidase 2, cytosolic (A)	ko00053: Ascorbate and aldarate metabolism; ko00480: Glutathione metabolism; ko01100: Metabolic pathways
Solyc02g083630.3	9.20333	10.0767	0.13079	K00434 L-ascorbate peroxidase [EC:1.11.1.11] | (RefSeq) L-ascorbate peroxidase 3 (A)	ko00053: Ascorbate and aldarate metabolism; ko00480: Glutathione metabolism; ko01100: Metabolic pathways
Solyc01g111510.3	321.023	344.307	0.101016	K00434 L-ascorbate peroxidase [EC:1.11.1.11] | (RefSeq) L-ascorbate peroxidase 3, peroxisomal (A)	ko00053: Ascorbate and aldarate metabolism; ko00480: Glutathione metabolism; ko01100: Metabolic pathways
Solyc02g083620.3	8.49333	8.79333	0.0500793	K00434 L-ascorbate peroxidase [EC:1.11.1.11] | (RefSeq) L-ascorbate peroxidase 5 (A)	ko00053: Ascorbate and aldarate metabolism; ko00480: Glutathione metabolism; ko01100: Metabolic pathways
Solyc08g059760.3	36.4367	39.24	0.106934	K00434 L-ascorbate peroxidase [EC:1.11.1.11] | (RefSeq) putative L-ascorbate peroxidase 6 isoform X1 (A)	ko00053: Ascorbate and aldarate metabolism; ko00480: Glutathione metabolism; ko01100: Metabolic pathways
Solyc04g074640.3	72.91	105.14	0.528123	K00434 L-ascorbate peroxidase [EC:1.11.1.11] | (RefSeq) thylakoid lumenal 29 kDa protein, chloroplastic-like (A)	ko00053: Ascorbate and aldarate metabolism; ko00480: Glutathione metabolism; ko01100: Metabolic pathways
Solyc04g026030.3	49.6233	62.2433	0.326901	K00797 spermidine synthase [EC:2.5.1.16] | (RefSeq) spermidine synthase 1 (A)	ko00270: Cysteine and methionine metabolism; ko00330: Arginine and proline metabolism; ko00480: Glutathione metabolism; ko01100: Metabolic pathways
Solyc12g094430.1	96.36	111.197	0.206607	K00799 glutathione S-transferase [EC:2.5.1.18] | (RefSeq) glutathione S-transferase (A)	ko00480: Glutathione metabolism; ko01100: Metabolic pathways
Solyc09g074850.3	2.22667	2.69	0.272721	K00799 glutathione S-transferase [EC:2.5.1.18] | (RefSeq) glutathione S-transferase PARB (A)	ko00480: Glutathione metabolism; ko01100: Metabolic pathways
Solyc03g116130.2	0.01	0.13	3.70044	K00799 glutathione S-transferase [EC:2.5.1.18] | (RefSeq) glutathione S-transferase U10-like (A)	ko00480: Glutathione metabolism; ko01100: Metabolic pathways
Solyc07g056420.3	36.9433	45.0033	0.284718	K00799 glutathione S-transferase [EC:2.5.1.18] | (RefSeq) glutathione S-transferase-like protein (A)	ko00480: Glutathione metabolism; ko01100: Metabolic pathways
Solyc09g011570.3	101.707	120.347	0.242782	K00799 glutathione S-transferase [EC:2.5.1.18] | (RefSeq) probable glutathione S-transferase (A)	ko00480: Glutathione metabolism; ko01100: Metabolic pathways
Solyc09g063150.3	0.03	0.0366667	0.289507	K00799 glutathione S-transferase [EC:2.5.1.18] | (RefSeq) probable glutathione S-transferase (A)	ko00480: Glutathione metabolism; ko01100: Metabolic pathways
Solyc04g009530.3	41.9467	46.9067	0.161237	K00799 glutathione S-transferase [EC:2.5.1.18] | (RefSeq) protein IN2-1 homolog B isoform X1 (A)	ko00480: Glutathione metabolism; ko01100: Metabolic pathways
Solyc09g010560.2	6.06	6.42333	0.0840044	K01469 5-oxoprolinase (ATP-hydrolysing) [EC:3.5.2.9] | (RefSeq) 5-oxoprolinase (A)	ko00480: Glutathione metabolism; ko01100: Metabolic pathways
Solyc03g098300.1	0.556667	0.82	0.55881	K01581 ornithine decarboxylase [EC:4.1.1.17] | (RefSeq) ornithine decarboxylase-like (A)	ko00330: Arginine and proline metabolism; ko00480: Glutathione metabolism; ko01100: Metabolic pathways; ko01110: Biosynthesis of secondary metabolites
Solyc08g081010.3	40.67	43.41	0.0940624	K01919 glutamate--cysteine ligase [EC:6.3.2.2] | (RefSeq) GSH1; glutamate--cysteine ligase, chloroplastic (A)	ko00270: Cysteine and methionine metabolism; ko00480: Glutathione metabolism; ko01100: Metabolic pathways; ko01240: Biosynthesis of cofactors
Solyc04g051350.3	8.2	10.0533	0.293978	K10807 ribonucleoside-diphosphate reductase subunit M1 [EC:1.17.4.1] | (RefSeq) ribonucleoside-diphosphate reductase large subunit isoform X1 (A)	ko00230: Purine metabolism; ko00240: Pyrimidine metabolism; ko00480: Glutathione metabolism; ko01100: Metabolic pathways
Solyc04g012060.3	9.53333	11.2933	0.244419	K10807 ribonucleoside-diphosphate reductase subunit M1 [EC:1.17.4.1] | (RefSeq) ribonucleoside-diphosphate reductase large subunit-like (A)	ko00230: Purine metabolism; ko00240: Pyrimidine metabolism; ko00480: Glutathione metabolism; ko01100: Metabolic pathways
Solyc01g080210.3	5.05333	6.42667	0.346835	K10808 ribonucleoside-diphosphate reductase subunit M2 [EC:1.17.4.1] | (RefSeq) ribonucleoside-diphosphate reductase small chain A-like (A)	ko00230: Purine metabolism; ko00240: Pyrimidine metabolism; ko00480: Glutathione metabolism; ko01100: Metabolic pathways
Solyc01g098610.3	14.2167	14.9867	0.0760963	K21456 glutathione synthase [EC:6.3.2.3] | (RefSeq) GSH2; glutathione synthetase, chloroplastic (A)	ko00270: Cysteine and methionine metabolism; ko00480: Glutathione metabolism; ko01100: Metabolic pathways; ko01240: Biosynthesis of cofactors
Solyc04g064470.2	0.773333	1.17333	0.601451	K21888 glutathione dehydrogenase/transferase [EC:1.8.5.1 2.5.1.18] | (RefSeq) uncharacterized protein LOC101254215 (A)	ko00053: Ascorbate and aldarate metabolism; ko00480: Glutathione metabolism; ko01100: Metabolic pathways
Solyc06g075513.1	7.57667	13.2733	0.808896	K21888 glutathione dehydrogenase/transferase [EC:1.8.5.1 2.5.1.18] | (RefSeq) uncharacterized protein LOC101254215 (A)	ko00053: Ascorbate and aldarate metabolism; ko00480: Glutathione metabolism; ko01100: Metabolic pathways
novel.1945	1.97	2.89	0.552874	K21888 glutathione dehydrogenase/transferase [EC:1.8.5.1 2.5.1.18] | (RefSeq) uncharacterized protein LOC101254215 (A)	ko00053: Ascorbate and aldarate metabolism; ko00480: Glutathione metabolism; ko01100: Metabolic pathways
Solyc12g096320.2	2.33667	4.01333	0.780349	K22596 gamma-glutamylcyclotransferase, plant [EC:4.3.2.9] | (RefSeq) gamma-glutamylcyclotransferase 2-1 (A)	ko00480: Glutathione metabolism; ko01100: Metabolic pathways
Solyc00g019740.1	0.156667	0.466667	K02109 F-type H+-transporting ATPase subunit b | (RefSeq) uncharacterized protein LOC112940612 (A)	ko00190: Oxidative phosphorylation; ko00195: Photosynthesis; ko01100: Metabolic pathways	--	--	--
Solyc00g203660.2	7.56	6.22	K01601 ribulose-bisphosphate carboxylase large chain [EC:4.1.1.39] | (RefSeq) rbcL, LyesC2p061; ribulose-1,5-bisphosphate carboxylase/oxygenase large subunit (A)	ko00630: Glyoxylate and dicarboxylate metabolism; ko00710: Carbon fixation in photosynthetic organisms; ko01100: Metabolic pathways; ko01110: Biosynthesis of secondary metabolites; ko01200: Carbon metabolism	--	--	--
Solyc00g230070.1	2.79	3.64333	K02705 photosystem II CP43 chlorophyll apoprotein | (RefSeq) psbC, LyesC2p073; photosystem II CP43 chlorophyll apoprotein (A)	ko00195: Photosynthesis; ko01100: Metabolic pathways	--	--	--
Solyc00g230080.1	2.61	2.86	K02706 photosystem II P680 reaction center D2 protein [EC:1.10.3.9] | (RefSeq) psbD, LyesC2p074; photosystem II protein D2 (A)	ko00195: Photosynthesis; ko01100: Metabolic pathways	--	--	--
Solyc01g006630.3	8.96333	9.02333	K02705 photosystem II CP43 chlorophyll apoprotein | (RefSeq) psbC, LyesC2p073; photosystem II CP43 chlorophyll apoprotein (A)	ko00195: Photosynthesis; ko01100: Metabolic pathways	--	--	--
Solyc01g017220.1	56.6533	64.3933	K02114 F-type H+-transporting ATPase subunit epsilon | (RefSeq) atpE, LyesC2p063; ATP synthase CF1 epsilon subunit (A)	ko00190: Oxidative phosphorylation; ko00195: Photosynthesis; ko01100: Metabolic pathways	--	--	--
Solyc01g017330.2	0	0.02	K02689 photosystem I P700 chlorophyll a apoprotein A1 | (RefSeq) psaA, LyesC2p069; photosystem I P700 apoprotein A1 (A)	ko00195: Photosynthesis; ko01100: Metabolic pathways	--	--	--
Solyc01g017740.1	1.65667	0.556667	K02635 cytochrome b6 | (RefSeq) petB, LyesC2p040; cytochrome b6 (A)	ko00195: Photosynthesis; ko01100: Metabolic pathways	--	--	--
Solyc01g018090.2	0.0533333	0.973333	K02689 photosystem I P700 chlorophyll a apoprotein A1 | (RefSeq) psaA, LyesC2p069; photosystem I P700 apoprotein A1 (A)	ko00195: Photosynthesis; ko01100: Metabolic pathways	--	--	--
Solyc01g048590.2	4.79667	4.38333	K02703 photosystem II P680 reaction center D1 protein [EC:1.10.3.9] | (RefSeq) psbA, LyesC2p089; photosystem II protein D1 (A)	ko00195: Photosynthesis; ko01100: Metabolic pathways	--	--	--
Solyc01g050020.2	1.11333	2.35667	K02704 photosystem II CP47 chlorophyll apoprotein | (RefSeq) psbB, LyesC2p044; photosystem II CP47 chlorophyll apoprotein (A)	ko00195: Photosynthesis; ko01100: Metabolic pathways	--	--	--
Solyc01g060085.1	17.4467	18.7833	K01601 ribulose-bisphosphate carboxylase large chain [EC:4.1.1.39] | (RefSeq) rbcL, LyesC2p061; ribulose-1,5-bisphosphate carboxylase/oxygenase large subunit (A)	ko00630: Glyoxylate and dicarboxylate metabolism; ko00710: Carbon fixation in photosynthetic organisms; ko01100: Metabolic pathways; ko01110: Biosynthesis of secondary metabolites; ko01200: Carbon metabolism	--	--	--
Solyc01g080460.3	111.693	123.467	K01006 pyruvate, orthophosphate dikinase [EC:2.7.9.1] | (RefSeq) pyruvate, phosphate dikinase, chloroplastic (A)	ko00010: Glycolysis / Gluconeogenesis; ko00620: Pyruvate metabolism; ko00710: Carbon fixation in photosynthetic organisms; ko01100: Metabolic pathways; ko01110: Biosynthesis of secondary metabolites; ko01200: Carbon metabolism	--	--	--
Solyc01g090710.3	2.09333	2.23	K00025 malate dehydrogenase [EC:1.1.1.37] | (RefSeq) cMDH; cytosolic malate dehydrogenase (A)	ko00020: Citrate cycle (TCA cycle); ko00270: Cysteine and methionine metabolism; ko00620: Pyruvate metabolism; ko00630: Glyoxylate and dicarboxylate metabolism; ko00710: Carbon fixation in photosynthetic organisms; ko01100: Metabolic pathways; ko01110: Biosynthesis of secondary metabolites; ko01200: Carbon metabolism	--	--	--
Solyc01g094200.3	33.8533	35.5933	K00028 malate dehydrogenase (decarboxylating) [EC:1.1.1.39] | (RefSeq) NAD-dependent malic enzyme 59 kDa isoform, mitochondrial (A)	ko00620: Pyruvate metabolism; ko00710: Carbon fixation in photosynthetic organisms; ko01100: Metabolic pathways; ko01200: Carbon metabolism	--	--	--
Solyc01g097460.3	476.843	599.677	K01807 ribose 5-phosphate isomerase A [EC:5.3.1.6] | (RefSeq) probable ribose-5-phosphate isomerase 3, chloroplastic (A)	ko00030: Pentose phosphate pathway; ko00710: Carbon fixation in photosynthetic organisms; ko01100: Metabolic pathways; ko01110: Biosynthesis of secondary metabolites; ko01200: Carbon metabolism; ko01230: Biosynthesis of amino acids	--	--	--
Solyc01g097530.2	0.0933333	0.363333	K02703 photosystem II P680 reaction center D1 protein [EC:1.10.3.9] | (RefSeq) psbA, LyesC2p089; photosystem II protein D1 (A)	ko00195: Photosynthesis; ko01100: Metabolic pathways	--	--	--
Solyc01g098950.2	1.09667	1.01333	K00134 glyceraldehyde 3-phosphate dehydrogenase [EC:1.2.1.12] | (RefSeq) glyceraldehyde-3-phosphate dehydrogenase GAPC1, cytosolic-like (A)	ko00010: Glycolysis / Gluconeogenesis; ko00710: Carbon fixation in photosynthetic organisms; ko01100: Metabolic pathways; ko01110: Biosynthesis of secondary metabolites; ko01200: Carbon metabolism; ko01230: Biosynthesis of amino acids	--	--	--
Solyc01g102770.1	16.0967	17.88	K02724 photosystem II PsbZ protein | (RefSeq) psbZ, LyesC2p072; photosystem II protein Z (A)	ko00195: Photosynthesis	--	--	--
Solyc01g103920.3	28.2267	9.33667	K02639 ferredoxin | (RefSeq) ferredoxin (A)	ko00195: Photosynthesis	--	--	--
Solyc01g105040.3	4.79333	4.23	K08917 light-harvesting complex II chlorophyll a/b binding protein 6 | (RefSeq) CAB-10A; chlorophyll a-b binding protein CP24 10A, chloroplastic (A)	ko00196: Photosynthesis - antenna proteins; ko01100: Metabolic pathways	--	--	--
Solyc01g105050.3	516.92	650.053	K08917 light-harvesting complex II chlorophyll a/b binding protein 6 | (RefSeq) LHCP; chlorophyll a-b binding protein CP24 10B, chloroplastic (A)	ko00196: Photosynthesis - antenna proteins; ko01100: Metabolic pathways	--	--	--
Solyc01g106010.3	32.2267	35.8733	K03841 fructose-1,6-bisphosphatase I [EC:3.1.3.11] | (RefSeq) uncharacterized protein LOC101253137 (A)	ko00010: Glycolysis / Gluconeogenesis; ko00030: Pentose phosphate pathway; ko00051: Fructose and mannose metabolism; ko00710: Carbon fixation in photosynthetic organisms; ko01100: Metabolic pathways; ko01110: Biosynthesis of secondary metabolites; ko01200: Carbon metabolism	--	--	--
Solyc01g106480.3	387.03	360.633	K00026 malate dehydrogenase [EC:1.1.1.37] | (RefSeq) gMDH; glyoxisomal malate dehydrogenase (A)	ko00020: Citrate cycle (TCA cycle); ko00270: Cysteine and methionine metabolism; ko00620: Pyruvate metabolism; ko00630: Glyoxylate and dicarboxylate metabolism; ko00710: Carbon fixation in photosynthetic organisms; ko01100: Metabolic pathways; ko01110: Biosynthesis of secondary metabolites; ko01200: Carbon metabolism	--	--	--
Solyc01g110360.3	1670.35	1605.9	K01623 fructose-bisphosphate aldolase, class I [EC:4.1.2.13] | (RefSeq) SlFBA1; fructose 1,6-bisphosphate aldolase 1 (A)	ko00010: Glycolysis / Gluconeogenesis; ko00030: Pentose phosphate pathway; ko00051: Fructose and mannose metabolism; ko00710: Carbon fixation in photosynthetic organisms; ko01100: Metabolic pathways; ko01110: Biosynthesis of secondary metabolites; ko01200: Carbon metabolism; ko01230: Biosynthesis of amino acids	--	--	--
Solyc01g110365.1	0.84	0.353333	K01623 fructose-bisphosphate aldolase, class I [EC:4.1.2.13] | (RefSeq) SlFBA1; fructose 1,6-bisphosphate aldolase 1 (A)	ko00010: Glycolysis / Gluconeogenesis; ko00030: Pentose phosphate pathway; ko00051: Fructose and mannose metabolism; ko00710: Carbon fixation in photosynthetic organisms; ko01100: Metabolic pathways; ko01110: Biosynthesis of secondary metabolites; ko01200: Carbon metabolism; ko01230: Biosynthesis of amino acids	--	--	--
Solyc01g111120.3	379.003	432.09	K01803 triosephosphate isomerase (TIM) [EC:5.3.1.1] | (RefSeq) triosephosphate isomerase, chloroplastic (A)	ko00010: Glycolysis / Gluconeogenesis; ko00051: Fructose and mannose metabolism; ko00562: Inositol phosphate metabolism; ko00710: Carbon fixation in photosynthetic organisms; ko01100: Metabolic pathways; ko01110: Biosynthesis of secondary metabolites; ko01200: Carbon metabolism; ko01230: Biosynthesis of amino acids	--	--	--
Solyc02g020940.3	539.787	625.083	K05298 glyceraldehyde-3-phosphate dehydrogenase (NADP+) (phosphorylating) [EC:1.2.1.13] | (RefSeq) glyceraldehyde-3-phosphate dehydrogenase A, chloroplastic-like (A)	ko00710: Carbon fixation in photosynthetic organisms; ko01100: Metabolic pathways; ko01200: Carbon metabolism	--	--	--
Solyc02g020960.2	0	0.09	K02689 photosystem I P700 chlorophyll a apoprotein A1 | (RefSeq) psaA, LyesC2p069; photosystem I P700 apoprotein A1 (A)	ko00195: Photosynthesis; ko01100: Metabolic pathways	--	--	--
Solyc02g021290.1	28.0433	10.25	K02703 photosystem II P680 reaction center D1 protein [EC:1.10.3.9] | (RefSeq) psbA, LyesC2p089; photosystem II protein D1 (A)	ko00195: Photosynthesis; ko01100: Metabolic pathways	--	--	--
Solyc02g024050.3	16.73	16.8333	K02641 ferredoxin--NADP+ reductase [EC:1.18.1.2] | (RefSeq) ferredoxin--NADP reductase, root-type isozyme, chloroplastic (A)	ko00195: Photosynthesis; ko01100: Metabolic pathways	--	--	--
Solyc02g036320.1	3.38667	3.95667	K02690 photosystem I P700 chlorophyll a apoprotein A2 | (RefSeq) psaB, LyesC2p070; photosystem I P700 apoprotein A2 (A)	ko00195: Photosynthesis; ko01100: Metabolic pathways	--	--	--
Solyc02g062110.3	12.6767	14.29	K02641 ferredoxin--NADP+ reductase [EC:1.18.1.2] | (RefSeq) ferredoxin--NADP reductase, leaf-type isozyme, chloroplastic-like isoform X1 (A)	ko00195: Photosynthesis; ko01100: Metabolic pathways	--	--	--
Solyc02g062340.3	1483.2	1796.43	K01623 fructose-bisphosphate aldolase, class I [EC:4.1.2.13] | (RefSeq) SlFBA2; fructose-bisphosphate aldolase (A)	ko00010: Glycolysis / Gluconeogenesis; ko00030: Pentose phosphate pathway; ko00051: Fructose and mannose metabolism; ko00710: Carbon fixation in photosynthetic organisms; ko01100: Metabolic pathways; ko01110: Biosynthesis of secondary metabolites; ko01200: Carbon metabolism; ko01230: Biosynthesis of amino acids	--	--	--
Solyc02g063150.3	11466.4	13737	K01602 ribulose-bisphosphate carboxylase small chain [EC:4.1.1.39] | (RefSeq) rbcS1; ribulose bisphosphate carboxylase small chain 1, chloroplastic (A)	ko00630: Glyoxylate and dicarboxylate metabolism; ko00710: Carbon fixation in photosynthetic organisms; ko01100: Metabolic pathways; ko01110: Biosynthesis of secondary metabolites; ko01200: Carbon metabolism	--	--	--
Solyc02g063490.3	12.2	13.3133	K00026 malate dehydrogenase [EC:1.1.1.37] | (RefSeq) malate dehydrogenase, glyoxysomal (A)	ko00020: Citrate cycle (TCA cycle); ko00270: Cysteine and methionine metabolism; ko00620: Pyruvate metabolism; ko00630: Glyoxylate and dicarboxylate metabolism; ko00710: Carbon fixation in photosynthetic organisms; ko01100: Metabolic pathways; ko01110: Biosynthesis of secondary metabolites; ko01200: Carbon metabolism	--	--	--
Solyc02g065400.3	1362.69	1805.57	K02716 photosystem II oxygen-evolving enhancer protein 1 | (RefSeq) PSBO; oxygen-evolving enhancer protein 1, chloroplastic (A)	ko00195: Photosynthesis	--	--	--
Solyc02g068930.3	15.34	15.7333	K08906 cytochrome c6 | (RefSeq) cytochrome c6, chloroplastic (A)	ko00195: Photosynthesis	--	--	--
Solyc02g068995.1	0.0833333	0.19	K08906 cytochrome c6 | (RefSeq) cytochrome c6, chloroplastic (A)	ko00195: Photosynthesis	--	--	--
Solyc02g069450.3	7.67	7.81667	K02694 photosystem I subunit III | (RefSeq) photosystem I reaction center subunit III, chloroplastic (A)	ko00195: Photosynthesis; ko01100: Metabolic pathways	--	--	--
Solyc02g069455.1	22.6967	31.5167	K02694 photosystem I subunit III | (RefSeq) photosystem I reaction center subunit III, chloroplastic (A)	ko00195: Photosynthesis; ko01100: Metabolic pathways	--	--	--
Solyc02g069460.3	0.73	0.79	K02694 photosystem I subunit III | (RefSeq) photosystem I reaction center subunit III, chloroplastic (A)	ko00195: Photosynthesis; ko01100: Metabolic pathways	--	--	--
Solyc02g069620.3	32.6933	41.46	K01807 ribose 5-phosphate isomerase A [EC:5.3.1.6] | (RefSeq) probable ribose-5-phosphate isomerase 4, chloroplastic (A)	ko00030: Pentose phosphate pathway; ko00710: Carbon fixation in photosynthetic organisms; ko01100: Metabolic pathways; ko01110: Biosynthesis of secondary metabolites; ko01200: Carbon metabolism; ko01230: Biosynthesis of amino acids	--	--	--
Solyc02g070935.1	4205.38	6570.76	K08912 light-harvesting complex II chlorophyll a/b binding protein 1 | (RefSeq) chlorophyll a-b binding protein 1B, chloroplastic-like (A)	ko00196: Photosynthesis - antenna proteins; ko01100: Metabolic pathways	--	--	--
Solyc02g071020.3	2843.04	4049.6	K08912 light-harvesting complex II chlorophyll a/b binding protein 1 | (RefSeq) chlorophyll a-b binding protein 1C, chloroplastic (A)	ko00196: Photosynthesis - antenna proteins; ko01100: Metabolic pathways	--	--	--
Solyc02g077860.1	0.826667	1.35	K01601 ribulose-bisphosphate carboxylase large chain [EC:4.1.1.39] | (RefSeq) rbcL, LyesC2p061; ribulose-1,5-bisphosphate carboxylase/oxygenase large subunit (A)	ko00630: Glyoxylate and dicarboxylate metabolism; ko00710: Carbon fixation in photosynthetic organisms; ko01100: Metabolic pathways; ko01110: Biosynthesis of secondary metabolites; ko01200: Carbon metabolism	--	--	--
Solyc02g079940.3	0.956667	1.76333	K08901 photosystem II oxygen-evolving enhancer protein 3 | (RefSeq) PsbQ; photosystem II oxygen-evolving complex protein 3 (A)	ko00195: Photosynthesis	--	--	--
Solyc02g079950.3	752.587	931.09	K08901 photosystem II oxygen-evolving enhancer protein 3 | (RefSeq) PsbQ; photosystem II oxygen-evolving complex protein 3 (A)	ko00195: Photosynthesis	--	--	--
Solyc02g080540.1	1309.19	1452.15	K02115 F-type H+-transporting ATPase subunit gamma | (RefSeq) ATP synthase gamma chain, chloroplastic (A)	ko00190: Oxidative phosphorylation; ko00195: Photosynthesis; ko01100: Metabolic pathways	--	--	--
Solyc02g080635.1	9.7	8.99667	K02705 photosystem II CP43 chlorophyll apoprotein | (RefSeq) psbC, LyesC2p073; photosystem II CP43 chlorophyll apoprotein (A)	ko00195: Photosynthesis; ko01100: Metabolic pathways	--	--	--
Solyc02g083810.3	1554.52	1807.93	K02641 ferredoxin--NADP+ reductase [EC:1.18.1.2] | (RefSeq) ferredoxin--NADP reductase, leaf-type isozyme, chloroplastic (A)	ko00195: Photosynthesis; ko01100: Metabolic pathways	--	--	--
Solyc02g084440.3	3368.9	3833.1	K01623 fructose-bisphosphate aldolase, class I [EC:4.1.2.13] | (RefSeq) SlFBA3; fructose-bisphosphate aldolase 1, chloroplastic (A)	ko00010: Glycolysis / Gluconeogenesis; ko00030: Pentose phosphate pathway; ko00051: Fructose and mannose metabolism; ko00710: Carbon fixation in photosynthetic organisms; ko01100: Metabolic pathways; ko01110: Biosynthesis of secondary metabolites; ko01200: Carbon metabolism; ko01230: Biosynthesis of amino acids	--	--	--
Solyc02g085950.3	5052.8	6600.81	K01602 ribulose-bisphosphate carboxylase small chain [EC:4.1.1.39] | (RefSeq) Rbcs-3B; ribulose bisphosphate carboxylase small chain 3B, chloroplastic (A)	ko00630: Glyoxylate and dicarboxylate metabolism; ko00710: Carbon fixation in photosynthetic organisms; ko01100: Metabolic pathways; ko01110: Biosynthesis of secondary metabolites; ko01200: Carbon metabolism	--	--	--
Solyc03g005190.3	6.92	8.88	K02639 ferredoxin | (RefSeq) ferredoxin C 1, chloroplastic (A)	ko00195: Photosynthesis	--	--	--
Solyc03g005760.1	2763.36	4111.36	K08912 light-harvesting complex II chlorophyll a/b binding protein 1 | (RefSeq) chlorophyll a-b binding protein 3A, chloroplastic-like (A)	ko00196: Photosynthesis - antenna proteins; ko01100: Metabolic pathways	--	--	--
Solyc03g005770.2	1607.82	2250.19	K08912 light-harvesting complex II chlorophyll a/b binding protein 1 | (RefSeq) chlorophyll a-b binding protein 1B, chloroplastic-like (A)	ko00196: Photosynthesis - antenna proteins; ko01100: Metabolic pathways	--	--	--
Solyc03g005775.1	157.16	251.39	K08912 light-harvesting complex II chlorophyll a/b binding protein 1 | (RefSeq) Cab-3C; chlorophyll a-b binding protein 3C, chloroplastic (A)	ko00196: Photosynthesis - antenna proteins; ko01100: Metabolic pathways	--	--	--
Solyc03g034220.3	19970.9	22512.5	K01602 ribulose-bisphosphate carboxylase small chain [EC:4.1.1.39] | (RefSeq) ribulose bisphosphate carboxylase small chain 2A, chloroplastic (A)	ko00630: Glyoxylate and dicarboxylate metabolism; ko00710: Carbon fixation in photosynthetic organisms; ko01100: Metabolic pathways; ko01110: Biosynthesis of secondary metabolites; ko01200: Carbon metabolism	--	--	--
Solyc03g071590.3	75.6867	99.5667	K00051 malate dehydrogenase (NADP+) [EC:1.1.1.82] | (RefSeq) chMDH; chloroplast malate dehydrogenase (A)	ko00620: Pyruvate metabolism; ko00710: Carbon fixation in photosynthetic organisms; ko01100: Metabolic pathways; ko01200: Carbon metabolism	--	--	--
Solyc03g111010.3	189.99	171.69	K00134 glyceraldehyde 3-phosphate dehydrogenase [EC:1.2.1.12] | (RefSeq) GAPDH; glyceraldehyde 3-phosphate dehydrogenase (A)	ko00010: Glycolysis / Gluconeogenesis; ko00710: Carbon fixation in photosynthetic organisms; ko01100: Metabolic pathways; ko01110: Biosynthesis of secondary metabolites; ko01200: Carbon metabolism; ko01230: Biosynthesis of amino acids	--	--	--
Solyc03g114930.3	70.2767	82.06	K02717 photosystem II oxygen-evolving enhancer protein 2 | (RefSeq) photosystem II reaction center PsbP family protein (A)	ko00195: Photosynthesis	--	--	--
Solyc03g115005.1	9.36333	7.23	K08901 photosystem II oxygen-evolving enhancer protein 3 | (RefSeq) PsbQ; photosystem II oxygen-evolving complex protein 3 (A)	ko00195: Photosynthesis	--	--	--
Solyc03g115330.2	3.04333	3.66667	K02689 photosystem I P700 chlorophyll a apoprotein A1 | (RefSeq) psaA, LyesC2p069; photosystem I P700 apoprotein A1 (A)	ko00195: Photosynthesis; ko01100: Metabolic pathways	--	--	--
Solyc03g115820.3	137.02	146.617	K01783 ribulose-phosphate 3-epimerase [EC:5.1.3.1] | (RefSeq) ribulose-phosphate 3-epimerase, chloroplastic (A)	ko00030: Pentose phosphate pathway; ko00040: Pentose and glucuronate interconversions; ko00710: Carbon fixation in photosynthetic organisms; ko01100: Metabolic pathways; ko01110: Biosynthesis of secondary metabolites; ko01200: Carbon metabolism; ko01230: Biosynthesis of amino acids	--	--	--
Solyc03g115900.3	1164.61	1793.97	K08910 light-harvesting complex I chlorophyll a/b binding protein 4 | (RefSeq) CAB11; chlorophyll a-b binding protein CAB11 (A)	ko00196: Photosynthesis - antenna proteins; ko01100: Metabolic pathways	--	--	--
Solyc03g115990.2	37.5467	27.3167	K00026 malate dehydrogenase [EC:1.1.1.37] | (RefSeq) malate dehydrogenase, chloroplastic (A)	ko00020: Citrate cycle (TCA cycle); ko00270: Cysteine and methionine metabolism; ko00620: Pyruvate metabolism; ko00630: Glyoxylate and dicarboxylate metabolism; ko00710: Carbon fixation in photosynthetic organisms; ko01100: Metabolic pathways; ko01110: Biosynthesis of secondary metabolites; ko01200: Carbon metabolism	--	--	--
Solyc03g120640.3	1769.84	2218.89	K02695 photosystem I subunit VI | (RefSeq) photosystem I reaction center subunit VI-1, chloroplastic (A)	ko00195: Photosynthesis	--	--	--
Solyc03g120980.3	11.0433	9.9	K00029 malate dehydrogenase (oxaloacetate-decarboxylating)(NADP+) [EC:1.1.1.40] | (RefSeq) NADP-dependent malic enzyme, chloroplastic (A)	ko00620: Pyruvate metabolism; ko00710: Carbon fixation in photosynthetic organisms; ko01100: Metabolic pathways; ko01200: Carbon metabolism	--	--	--
Solyc03g122000.3	4.19333	2.46333	K02637 cytochrome b6-f complex subunit 4 | (RefSeq) petD, LyesC2p039; cytochrome b6/f complex subunit IV (A)	ko00195: Photosynthesis; ko01100: Metabolic pathways	--	--	--
Solyc03g123600.3	6.8	4.63	K00814 alanine transaminase [EC:2.6.1.2] | (RefSeq) alanine aminotransferase 2-like (A)	ko00220: Arginine biosynthesis; ko00250: Alanine, aspartate and glutamate metabolism; ko00710: Carbon fixation in photosynthetic organisms; ko01100: Metabolic pathways; ko01200: Carbon metabolism; ko01210: 2-Oxocarboxylic acid metabolism; ko01230: Biosynthesis of amino acids	--	--	--
Solyc03g123610.3	36.4133	31.5833	K00814 alanine transaminase [EC:2.6.1.2] | (RefSeq) alanine aminotransferase 2 (A)	ko00220: Arginine biosynthesis; ko00250: Alanine, aspartate and glutamate metabolism; ko00710: Carbon fixation in photosynthetic organisms; ko01100: Metabolic pathways; ko01200: Carbon metabolism; ko01210: 2-Oxocarboxylic acid metabolism; ko01230: Biosynthesis of amino acids	--	--	--
Solyc04g006970.3	6.41333	8.23667	K01595 phosphoenolpyruvate carboxylase [EC:4.1.1.31] | (RefSeq) phosphoenolpyruvate carboxylase 4 (A)	ko00620: Pyruvate metabolism; ko00710: Carbon fixation in photosynthetic organisms; ko01100: Metabolic pathways; ko01200: Carbon metabolism	--	--	--
Solyc04g009030.3	3499.27	4267	K05298 glyceraldehyde-3-phosphate dehydrogenase (NADP+) (phosphorylating) [EC:1.2.1.13] | (RefSeq) glyceraldehyde-3-phosphate dehydrogenase A, chloroplastic (A)	ko00710: Carbon fixation in photosynthetic organisms; ko01100: Metabolic pathways; ko01200: Carbon metabolism	--	--	--
Solyc04g009420.3	42.96	46.8033	K02717 photosystem II oxygen-evolving enhancer protein 2 | (RefSeq) photosystem II reaction center PsbP family protein (A)	ko00195: Photosynthesis	--	--	--
Solyc04g011510.3	415.247	467.607	K01803 triosephosphate isomerase (TIM) [EC:5.3.1.1] | (RefSeq) triosephosphate isomerase, cytosolic (A)	ko00010: Glycolysis / Gluconeogenesis; ko00051: Fructose and mannose metabolism; ko00562: Inositol phosphate metabolism; ko00710: Carbon fixation in photosynthetic organisms; ko01100: Metabolic pathways; ko01110: Biosynthesis of secondary metabolites; ko01200: Carbon metabolism; ko01230: Biosynthesis of amino acids	--	--	--
Solyc04g016170.2	1.14667	2.49	K02690 photosystem I P700 chlorophyll a apoprotein A2 | (RefSeq) psaB, LyesC2p070; photosystem I P700 apoprotein A2 (A)	ko00195: Photosynthesis; ko01100: Metabolic pathways	--	--	--
Solyc04g039850.1	15.0667	14.1167	K02112 F-type H+/Na+-transporting ATPase subunit beta [EC:7.1.2.2 7.2.2.1] | (RefSeq) atpB, LyesC2p062; ATP synthase CF1 beta subunit (A)	ko00190: Oxidative phosphorylation; ko00195: Photosynthesis; ko01100: Metabolic pathways	--	--	--
Solyc04g049240.1	29.7233	19.6067	K02711 photosystem II PsbJ protein | (RefSeq) psbJ, LyesC2p055; photosystem II protein J (A)	ko00195: Photosynthesis	--	--	--
Solyc04g071300.2	0.0466667	0	K02111 F-type H+/Na+-transporting ATPase subunit alpha [EC:7.1.2.2 7.2.2.1] | (RefSeq) atpA, LyesC2p084; ATP synthase CF1 alpha subunit (A)	ko00190: Oxidative phosphorylation; ko00195: Photosynthesis; ko01100: Metabolic pathways	--	--	--
Solyc04g071340.3	157.267	122.747	K03841 fructose-1,6-bisphosphatase I [EC:3.1.3.11] | (RefSeq) fructose-1,6-bisphosphatase, cytosolic (A)	ko00010: Glycolysis / Gluconeogenesis; ko00030: Pentose phosphate pathway; ko00051: Fructose and mannose metabolism; ko00710: Carbon fixation in photosynthetic organisms; ko01100: Metabolic pathways; ko01110: Biosynthesis of secondary metabolites; ko01200: Carbon metabolism	--	--	--
Solyc04g076880.3	13.8033	12.7033	K01610 phosphoenolpyruvate carboxykinase (ATP) [EC:4.1.1.49] | (RefSeq) phosphoenolpyruvate carboxykinase (A)	ko00010: Glycolysis / Gluconeogenesis; ko00020: Citrate cycle (TCA cycle); ko00620: Pyruvate metabolism; ko00710: Carbon fixation in photosynthetic organisms; ko01100: Metabolic pathways; ko01110: Biosynthesis of secondary metabolites; ko01200: Carbon metabolism	--	--	--
Solyc04g082010.1	3736.44	4196.11	K02638 plastocyanin | (RefSeq) PETE; plastocyanin, chloroplastic (A)	ko00195: Photosynthesis	--	--	--
Solyc04g082630.3	610.873	1019.4	K05298 glyceraldehyde-3-phosphate dehydrogenase (NADP+) (phosphorylating) [EC:1.2.1.13] | (RefSeq) glyceraldehyde-3-phosphate dehydrogenase B, chloroplastic (A)	ko00710: Carbon fixation in photosynthetic organisms; ko01100: Metabolic pathways; ko01200: Carbon metabolism	--	--	--
Solyc04g082930.2	61.46	68.6333	K14172 light-harvesting complex II chlorophyll a/b binding protein 7 | (RefSeq) chlorophyll a-b binding protein 7, chloroplastic (A)	ko00196: Photosynthesis - antenna proteins; ko01100: Metabolic pathways	--	--	--
Solyc05g005820.3	0.193333	0.156667	K00134 glyceraldehyde 3-phosphate dehydrogenase [EC:1.2.1.12] | (RefSeq) glyceraldehyde-3-phosphate dehydrogenase, cytosolic (A)	ko00010: Glycolysis / Gluconeogenesis; ko00710: Carbon fixation in photosynthetic organisms; ko01100: Metabolic pathways; ko01110: Biosynthesis of secondary metabolites; ko01200: Carbon metabolism; ko01230: Biosynthesis of amino acids	--	--	--
Solyc05g007260.3	41.2733	32.5533	K01783 ribulose-phosphate 3-epimerase [EC:5.1.3.1] | (RefSeq) ribulose-phosphate 3-epimerase, cytoplasmic isoform (A)	ko00030: Pentose phosphate pathway; ko00040: Pentose and glucuronate interconversions; ko00710: Carbon fixation in photosynthetic organisms; ko01100: Metabolic pathways; ko01110: Biosynthesis of secondary metabolites; ko01200: Carbon metabolism; ko01230: Biosynthesis of amino acids	--	--	--
Solyc05g007780.3	160.173	162.873	K08901 photosystem II oxygen-evolving enhancer protein 3 | (RefSeq) photosynthetic NDH subunit of lumenal location 2, chloroplastic isoform X2 (A)	ko00195: Photosynthesis	--	--	--
Solyc05g008370.1	124.99	113.687	K01807 ribose 5-phosphate isomerase A [EC:5.3.1.6] | (RefSeq) probable ribose-5-phosphate isomerase 2 (A)	ko00030: Pentose phosphate pathway; ko00710: Carbon fixation in photosynthetic organisms; ko01100: Metabolic pathways; ko01110: Biosynthesis of secondary metabolites; ko01200: Carbon metabolism; ko01230: Biosynthesis of amino acids	--	--	--
Solyc05g008450.3	80.61	89.55	K02641 ferredoxin--NADP+ reductase [EC:1.18.1.2] | (RefSeq) ferredoxin--NADP reductase, leaf-type isozyme, chloroplastic-like isoform X1 (A)	ko00195: Photosynthesis; ko01100: Metabolic pathways	--	--	--
Solyc05g008600.3	55.7167	52.57	K01623 fructose-bisphosphate aldolase, class I [EC:4.1.2.13] | (RefSeq) fructose-bisphosphate aldolase 3, chloroplastic (A)	ko00010: Glycolysis / Gluconeogenesis; ko00030: Pentose phosphate pathway; ko00051: Fructose and mannose metabolism; ko00710: Carbon fixation in photosynthetic organisms; ko01100: Metabolic pathways; ko01110: Biosynthesis of secondary metabolites; ko01200: Carbon metabolism; ko01230: Biosynthesis of amino acids	--	--	--
Solyc05g013380.3	960.753	873.32	K14272 glutamate--glyoxylate aminotransferase [EC:2.6.1.4 2.6.1.2 2.6.1.44] | (RefSeq) glutamate--glyoxylate aminotransferase 2 (A)	ko00220: Arginine biosynthesis; ko00250: Alanine, aspartate and glutamate metabolism; ko00260: Glycine, serine and threonine metabolism; ko00630: Glyoxylate and dicarboxylate metabolism; ko00710: Carbon fixation in photosynthetic organisms; ko01100: Metabolic pathways; ko01110: Biosynthesis of secondary metabolites; ko01200: Carbon metabolism; ko01210: 2-Oxocarboxylic acid metabolism; ko01230: Bi…	--	--	--
Solyc05g014470.3	792.717	775.413	K00134 glyceraldehyde 3-phosphate dehydrogenase [EC:1.2.1.12] | (RefSeq) GAPC2; glyceraldehyde-3-phosphate dehydrogenase (A)	ko00010: Glycolysis / Gluconeogenesis; ko00710: Carbon fixation in photosynthetic organisms; ko01100: Metabolic pathways; ko01110: Biosynthesis of secondary metabolites; ko01200: Carbon metabolism; ko01230: Biosynthesis of amino acids	--	--	--
Solyc05g014485.1	0.986667	1.43	K00134 glyceraldehyde 3-phosphate dehydrogenase [EC:1.2.1.12] | (RefSeq) GAPC2; glyceraldehyde-3-phosphate dehydrogenase (A)	ko00010: Glycolysis / Gluconeogenesis; ko00710: Carbon fixation in photosynthetic organisms; ko01100: Metabolic pathways; ko01110: Biosynthesis of secondary metabolites; ko01200: Carbon metabolism; ko01230: Biosynthesis of amino acids	--	--	--
Solyc05g016120.2	15.1233	15.2267	K02703 photosystem II P680 reaction center D1 protein [EC:1.10.3.9] | (RefSeq) psbA, LyesC2p089; photosystem II protein D1 (A)	ko00195: Photosynthesis; ko01100: Metabolic pathways	--	--	--
Solyc05g020010.1	0.686667	1.47667	K02690 photosystem I P700 chlorophyll a apoprotein A2 | (RefSeq) psaB, LyesC2p070; photosystem I P700 apoprotein A2 (A)	ko00195: Photosynthesis; ko01100: Metabolic pathways	--	--	--
Solyc05g021190.2	0.796667	1.09667	K02706 photosystem II P680 reaction center D2 protein [EC:1.10.3.9] | (RefSeq) psbD, LyesC2p074; photosystem II protein D2 (A)	ko00195: Photosynthesis; ko01100: Metabolic pathways	--	--	--
Solyc05g023720.1	3.62667	2.80333	K02634 apocytochrome f | (RefSeq) petA, LyesC2p056; cytochrome f (A)	ko00195: Photosynthesis; ko01100: Metabolic pathways	--	--	--
Solyc05g050120.3	50.3433	49.62	K00029 malate dehydrogenase (oxaloacetate-decarboxylating)(NADP+) [EC:1.1.1.40] | (RefSeq) ME2; cytosolic NADP-malic enzyme (A)	ko00620: Pyruvate metabolism; ko00710: Carbon fixation in photosynthetic organisms; ko01100: Metabolic pathways; ko01200: Carbon metabolism	--	--	--
Solyc05g050500.1	198.8	215.803	K02113 F-type H+-transporting ATPase subunit delta | (RefSeq) ATP synthase subunit delta, chloroplastic isoform X3 (A)	ko00190: Oxidative phosphorylation; ko00195: Photosynthesis; ko01100: Metabolic pathways	--	--	--
Solyc05g050970.3	23.85	24.58	K00615 transketolase [EC:2.2.1.1] | (RefSeq) transketolase, chloroplastic-like (A)	ko00030: Pentose phosphate pathway; ko00710: Carbon fixation in photosynthetic organisms; ko01100: Metabolic pathways; ko01110: Biosynthesis of secondary metabolites; ko01200: Carbon metabolism; ko01230: Biosynthesis of amino acids	--	--	--
Solyc05g052600.3	1243.59	1331.43	K01100 sedoheptulose-bisphosphatase [EC:3.1.3.37] | (RefSeq) SBPase; chloroplast sedoheptulose-1,7-bisphosphatase (A)	ko00710: Carbon fixation in photosynthetic organisms; ko01100: Metabolic pathways; ko01200: Carbon metabolism	--	--	--
Solyc05g055280.2	54.8633	43.46	K02639 ferredoxin | (RefSeq) ferredoxin, root R-B2 (A)	ko00195: Photosynthesis	--	--	--
Solyc05g056050.3	874.61	1327.03	K08907 light-harvesting complex I chlorophyll a/b binding protein 1 | (RefSeq) chlorophyll a-b binding protein 6A, chloroplastic (A)	ko00196: Photosynthesis - antenna proteins; ko01100: Metabolic pathways	--	--	--
Solyc05g056070.3	1619.23	2722.98	K08907 light-harvesting complex I chlorophyll a/b binding protein 1 | (RefSeq) CAB6A; chlorophyll a-b binding protein 6A, chloroplastic (A)	ko00196: Photosynthesis - antenna proteins; ko01100: Metabolic pathways	--	--	--
Solyc06g005490.3	17.4	17.3567	K01803 triosephosphate isomerase (TIM) [EC:5.3.1.1] | (RefSeq) triosephosphate isomerase, cytosolic (A)	ko00010: Glycolysis / Gluconeogenesis; ko00051: Fructose and mannose metabolism; ko00562: Inositol phosphate metabolism; ko00710: Carbon fixation in photosynthetic organisms; ko01100: Metabolic pathways; ko01110: Biosynthesis of secondary metabolites; ko01200: Carbon metabolism; ko01230: Biosynthesis of amino acids	--	--	--
Solyc06g009940.1	2.17333	2.84	K02689 photosystem I P700 chlorophyll a apoprotein A1 | (RefSeq) psaA, LyesC2p069; photosystem I P700 apoprotein A1 (A)	ko00195: Photosynthesis; ko01100: Metabolic pathways	--	--	--
Solyc06g054260.1	3142.26	3807.62	K02692 photosystem I subunit II | (RefSeq) photosystem I reaction center subunit II, chloroplastic (A)	ko00195: Photosynthesis; ko01100: Metabolic pathways	--	--	--
Solyc06g060340.3	2298.37	2188.16	K03542 photosystem II 22kDa protein | (RefSeq) psbS; photosystem II subunit S (A)	ko00195: Photosynthesis	--	--	--
Solyc06g063090.3	21.49	12.7	K00814 alanine transaminase [EC:2.6.1.2] | (RefSeq) alanine aminotransferase 2 (A)	ko00220: Arginine biosynthesis; ko00250: Alanine, aspartate and glutamate metabolism; ko00710: Carbon fixation in photosynthetic organisms; ko01100: Metabolic pathways; ko01200: Carbon metabolism; ko01210: 2-Oxocarboxylic acid metabolism; ko01230: Biosynthesis of amino acids	--	--	--
Solyc06g063360.3	1235.83	1628.7	K08916 light-harvesting complex II chlorophyll a/b binding protein 5 | (RefSeq) CAB9; chlorophyll a-b binding protein Cab9 (A)	ko00196: Photosynthesis - antenna proteins; ko01100: Metabolic pathways	--	--	--
Solyc06g065990.1	494.293	492.497	K02109 F-type H+-transporting ATPase subunit b | (RefSeq) ATP synthase subunit b', chloroplastic (A)	ko00190: Oxidative phosphorylation; ko00195: Photosynthesis; ko01100: Metabolic pathways	--	--	--
Solyc06g066000.2	1270.11	1285.1	K02109 F-type H+-transporting ATPase subunit b | (RefSeq) ATP synthase subunit b', chloroplastic (A)	ko00190: Oxidative phosphorylation; ko00195: Photosynthesis; ko01100: Metabolic pathways	--	--	--
Solyc06g066640.3	199.41	261.923	K02695 photosystem I subunit VI | (RefSeq) photosystem I reaction center subunit VI-1, chloroplastic-like (A)	ko00195: Photosynthesis	--	--	--
Solyc06g066650.3	13.8967	10.66	K02695 photosystem I subunit VI | (RefSeq) photosystem I reaction center subunit VI-1, chloroplastic-like (A)	ko00195: Photosynthesis	--	--	--
Solyc06g069730.3	310.137	593.133	K08910 light-harvesting complex I chlorophyll a/b binding protein 4 | (RefSeq) CAB12; chlorophyll a-b binding protein Cab12 (A)	ko00196: Photosynthesis - antenna proteins; ko01100: Metabolic pathways	--	--	--
Solyc06g071920.3	557.057	578.72	K00134 glyceraldehyde 3-phosphate dehydrogenase [EC:1.2.1.12] | (RefSeq) glyceraldehyde-3-phosphate dehydrogenase, cytosolic (A)	ko00010: Glycolysis / Gluconeogenesis; ko00710: Carbon fixation in photosynthetic organisms; ko01100: Metabolic pathways; ko01110: Biosynthesis of secondary metabolites; ko01200: Carbon metabolism; ko01230: Biosynthesis of amino acids	--	--	--
Solyc06g072540.1	41.8433	35.0833	K02111 F-type H+/Na+-transporting ATPase subunit alpha [EC:7.1.2.2 7.2.2.1] | (RefSeq) atpA, LyesC2p084; ATP synthase CF1 alpha subunit (A)	ko00190: Oxidative phosphorylation; ko00195: Photosynthesis; ko01100: Metabolic pathways	--	--	--
Solyc06g074200.3	2781.42	3821.05	K14332 photosystem I subunit PsaO | (RefSeq) photosystem I subunit O (A)	ko00195: Photosynthesis	--	--	--
Solyc06g082940.3	2549.95	3019.93	K02699 photosystem I subunit XI | (RefSeq) photosystem I reaction center subunit XI, chloroplastic (A)	ko00195: Photosynthesis	--	--	--
Solyc06g082950.3	1339.58	1689.69	K02699 photosystem I subunit XI | (RefSeq) photosystem I reaction center subunit XI, chloroplastic (A)	ko00195: Photosynthesis	--	--	--
Solyc06g084045.1	0.346667	0.0466667	K02721 photosystem II PsbW protein | (RefSeq) photosystem II reaction center W protein, chloroplastic (A)	ko00195: Photosynthesis	--	--	--
Solyc07g005750.3	4.72667	5.29	K02706 photosystem II P680 reaction center D2 protein [EC:1.10.3.9] | (RefSeq) psbD, LyesC2p074; photosystem II protein D2 (A)	ko00195: Photosynthesis; ko01100: Metabolic pathways	--	--	--
Solyc07g021230.2	0.0233333	0.04	K02690 photosystem I P700 chlorophyll a apoprotein A2 | (RefSeq) psaB, LyesC2p070; photosystem I P700 apoprotein A2 (A)	ko00195: Photosynthesis; ko01100: Metabolic pathways	--	--	--
Solyc07g021380.1	0	0.1	K02109 F-type H+-transporting ATPase subunit b | (RefSeq) atpF, LyesC2p083; ATP synthase CF0 subunit I (A)	ko00190: Oxidative phosphorylation; ko00195: Photosynthesis; ko01100: Metabolic pathways	--	--	--
Solyc07g022900.3	146.747	163.717	K08911 light-harvesting complex I chlorophyll a/b binding protein 5 | (RefSeq) photosystem I chlorophyll a/b-binding protein 5, chloroplastic (A)	ko00196: Photosynthesis - antenna proteins; ko01100: Metabolic pathways	--	--	--
Solyc07g024040.2	0.233333	1.04	K02696 photosystem I subunit VIII | (RefSeq) psaI, LyesC2p059; photosystem I subunit VIII (A)	ko00195: Photosynthesis	--	--	--
Solyc07g026865.1	0.496667	0.446667	K02112 F-type H+/Na+-transporting ATPase subunit beta [EC:7.1.2.2 7.2.2.1] | (RefSeq) atpB, LyesC2p062; ATP synthase CF1 beta subunit (A)	ko00190: Oxidative phosphorylation; ko00195: Photosynthesis; ko01100: Metabolic pathways	--	--	--
Solyc07g032110.3	8.80333	9.32667	K02634 apocytochrome f | (RefSeq) petA, LyesC2p056; cytochrome f (A)	ko00195: Photosynthesis; ko01100: Metabolic pathways	--	--	--
Solyc07g032640.2	2566.32	2938.62	K02716 photosystem II oxygen-evolving enhancer protein 1 | (RefSeq) OEE1; oxygen-evolving enhancer protein 1, chloroplastic (A)	ko00195: Photosynthesis	--	--	--
Solyc07g032740.3	22.6233	14.0833	K14454 aspartate aminotransferase, cytoplasmic [EC:2.6.1.1] | (RefSeq) aspartate aminotransferase, cytoplasmic (A)	ko00220: Arginine biosynthesis; ko00250: Alanine, aspartate and glutamate metabolism; ko00270: Cysteine and methionine metabolism; ko00330: Arginine and proline metabolism; ko00350: Tyrosine metabolism; ko00360: Phenylalanine metabolism; ko00400: Phenylalanine, tyrosine and tryptophan biosynthesis; ko00710: Carbon fixation in photosynthetic organisms; ko00950: Isoquinoline alkaloid biosynthesis; …	--	--	--
Solyc07g044860.3	2618.32	3232.53	K02717 photosystem II oxygen-evolving enhancer protein 2 | (RefSeq) PSBP; oxygen-evolving enhancer protein 2, chloroplastic (A)	ko00195: Photosynthesis	--	--	--
Solyc07g047850.3	2861.14	3575.37	K08913 light-harvesting complex II chlorophyll a/b binding protein 2 | (RefSeq) CAB4; chlorophyll a-b binding protein 4, chloroplastic (A)	ko00196: Photosynthesis - antenna proteins; ko01100: Metabolic pathways	--	--	--
Solyc07g054290.1	462.31	508.623	K08902 photosystem II Psb27 protein | (RefSeq) LOW QUALITY PROTEIN: photosystem II repair protein PSB27-H1, chloroplastic (A)	ko00195: Photosynthesis	--	--	--
Solyc07g055060.3	349.88	224.76	K01595 phosphoenolpyruvate carboxylase [EC:4.1.1.31] | (RefSeq) phosphoenolpyruvate carboxylase-like (A)	ko00620: Pyruvate metabolism; ko00710: Carbon fixation in photosynthetic organisms; ko01100: Metabolic pathways; ko01200: Carbon metabolism	--	--	--
Solyc07g055210.3	46.0267	39.34	K14455 aspartate aminotransferase, mitochondrial [EC:2.6.1.1] | (RefSeq) aspartate aminotransferase, mitochondrial (A)	ko00220: Arginine biosynthesis; ko00250: Alanine, aspartate and glutamate metabolism; ko00270: Cysteine and methionine metabolism; ko00330: Arginine and proline metabolism; ko00350: Tyrosine metabolism; ko00360: Phenylalanine metabolism; ko00400: Phenylalanine, tyrosine and tryptophan biosynthesis; ko00710: Carbon fixation in photosynthetic organisms; ko00950: Isoquinoline alkaloid biosynthesis; …	--	--	--
Solyc07g062530.3	0.0166667	0.216667	K01595 phosphoenolpyruvate carboxylase [EC:4.1.1.31] | (RefSeq) ppc2; phosphoenolpyruvate carboxylase (A)	ko00620: Pyruvate metabolism; ko00710: Carbon fixation in photosynthetic organisms; ko01100: Metabolic pathways; ko01200: Carbon metabolism	--	--	--
Solyc07g062650.3	309.9	346.44	K00026 malate dehydrogenase [EC:1.1.1.37] | (RefSeq) mMDH1; mitochondrial malate dehydrogenase (A)	ko00020: Citrate cycle (TCA cycle); ko00270: Cysteine and methionine metabolism; ko00620: Pyruvate metabolism; ko00630: Glyoxylate and dicarboxylate metabolism; ko00710: Carbon fixation in photosynthetic organisms; ko01100: Metabolic pathways; ko01110: Biosynthesis of secondary metabolites; ko01200: Carbon metabolism	--	--	--
Solyc07g063600.3	1465.69	2168.05	K08914 light-harvesting complex II chlorophyll a/b binding protein 3 | (RefSeq) chlorophyll a-b binding protein 13, chloroplastic-like (A)	ko00196: Photosynthesis - antenna proteins; ko01100: Metabolic pathways	--	--	--
Solyc07g066150.1	5391.79	5869.71	K08905 photosystem I subunit V | (RefSeq) photosystem I reaction center subunit V, chloroplastic (A)	ko00195: Photosynthesis	--	--	--
Solyc07g066310.3	6030.87	6711.27	K03541 photosystem II 10kDa protein | (RefSeq) PSBR; photosystem II 10 kDa polypeptide, chloroplastic (A)	ko00195: Photosynthesis	--	--	--
Solyc07g066610.3	991.28	1187.13	K00927 phosphoglycerate kinase [EC:2.7.2.3] | (RefSeq) phosphoglycerate kinase, chloroplastic (A)	ko00010: Glycolysis / Gluconeogenesis; ko00710: Carbon fixation in photosynthetic organisms; ko01100: Metabolic pathways; ko01110: Biosynthesis of secondary metabolites; ko01200: Carbon metabolism; ko01230: Biosynthesis of amino acids	--	--	--
Solyc08g006930.3	1535.57	1727.7	K02698 photosystem I subunit X | (RefSeq) photosystem I reaction center subunit psaK, chloroplastic (A)	ko00195: Photosynthesis	--	--	--
Solyc08g013670.3	3219.36	3544.02	K02701 photosystem I subunit PsaN | (RefSeq) photosystem I reaction center subunit (A)	ko00195: Photosynthesis	--	--	--
Solyc08g013860.3	13.6733	15.37	K00028 malate dehydrogenase (decarboxylating) [EC:1.1.1.39] | (RefSeq) NAD-dependent malic enzyme 62 kDa isoform, mitochondrial (A)	ko00620: Pyruvate metabolism; ko00710: Carbon fixation in photosynthetic organisms; ko01100: Metabolic pathways; ko01200: Carbon metabolism	--	--	--
Solyc08g066360.3	11.2467	14.66	K00029 malate dehydrogenase (oxaloacetate-decarboxylating)(NADP+) [EC:1.1.1.40] | (RefSeq) NADP-dependent malic enzyme isoform X1 (A)	ko00620: Pyruvate metabolism; ko00710: Carbon fixation in photosynthetic organisms; ko01100: Metabolic pathways; ko01200: Carbon metabolism	--	--	--
Solyc08g067320.2	237.323	294.493	K08912 light-harvesting complex II chlorophyll a/b binding protein 1 | (RefSeq) Cab-3C; chlorophyll a-b binding protein 3C, chloroplastic (A)	ko00196: Photosynthesis - antenna proteins; ko01100: Metabolic pathways	--	--	--
Solyc08g076220.3	2326.39	2489.74	K00855 phosphoribulokinase [EC:2.7.1.19] | (RefSeq) phosphoribulokinase, chloroplastic (A)	ko00710: Carbon fixation in photosynthetic organisms; ko01100: Metabolic pathways; ko01200: Carbon metabolism	--	--	--
Solyc08g077050.3	18.61	26.6467	K02639 ferredoxin | (RefSeq) ferredoxin C 2, chloroplastic (A)	ko00195: Photosynthesis	--	--	--
Solyc08g080320.3	11.3867	12.11	K02634 apocytochrome f | (RefSeq) petA, LyesC2p056; cytochrome f (A)	ko00195: Photosynthesis; ko01100: Metabolic pathways	--	--	--
Solyc09g008130.3	4.63333	3.75	K00927 phosphoglycerate kinase [EC:2.7.2.3] | (RefSeq) phosphoglycerate kinase, cytosolic isoform X1 (A)	ko00010: Glycolysis / Gluconeogenesis; ko00710: Carbon fixation in photosynthetic organisms; ko01100: Metabolic pathways; ko01110: Biosynthesis of secondary metabolites; ko01200: Carbon metabolism; ko01230: Biosynthesis of amino acids	--	--	--
Solyc09g009260.3	26.1967	26.5967	K01623 fructose-bisphosphate aldolase, class I [EC:4.1.2.13] | (RefSeq) SlFBA7; fructose-1,6-bisphosphate aldolase (A)	ko00010: Glycolysis / Gluconeogenesis; ko00030: Pentose phosphate pathway; ko00051: Fructose and mannose metabolism; ko00710: Carbon fixation in photosynthetic organisms; ko01100: Metabolic pathways; ko01110: Biosynthesis of secondary metabolites; ko01200: Carbon metabolism; ko01230: Biosynthesis of amino acids	--	--	--
Solyc09g011810.3	135.983	145.65	K03841 fructose-1,6-bisphosphatase I [EC:3.1.3.11] | (RefSeq) fructose-1,6-bisphosphatase 1, chloroplastic (A)	ko00010: Glycolysis / Gluconeogenesis; ko00030: Pentose phosphate pathway; ko00051: Fructose and mannose metabolism; ko00710: Carbon fixation in photosynthetic organisms; ko01100: Metabolic pathways; ko01110: Biosynthesis of secondary metabolites; ko01200: Carbon metabolism	--	--	--
Solyc09g011820.3	0.376667	0.443333	K03841 fructose-1,6-bisphosphatase I [EC:3.1.3.11] | (RefSeq) fructose-1,6-bisphosphatase 1, chloroplastic (A)	ko00010: Glycolysis / Gluconeogenesis; ko00030: Pentose phosphate pathway; ko00051: Fructose and mannose metabolism; ko00710: Carbon fixation in photosynthetic organisms; ko01100: Metabolic pathways; ko01110: Biosynthesis of secondary metabolites; ko01200: Carbon metabolism	--	--	--
Solyc09g014520.3	4203.85	5536.47	K08915 light-harvesting complex II chlorophyll a/b binding protein 4 | (RefSeq) chlorophyll a-b binding protein CP29.1, chloroplastic (A)	ko00196: Photosynthesis - antenna proteins; ko01100: Metabolic pathways	--	--	--
Solyc09g015490.3	3.11	3.51667	K01595 phosphoenolpyruvate carboxylase [EC:4.1.1.31] | (RefSeq) phosphoenolpyruvate carboxylase 4 (A)	ko00620: Pyruvate metabolism; ko00710: Carbon fixation in photosynthetic organisms; ko01100: Metabolic pathways; ko01200: Carbon metabolism	--	--	--
Solyc09g016930.1	0	0.0833333	K02705 photosystem II CP43 chlorophyll apoprotein | (RefSeq) psbC, LyesC2p073; photosystem II CP43 chlorophyll apoprotein (A)	ko00195: Photosynthesis; ko01100: Metabolic pathways	--	--	--
Solyc09g055950.1	4.49	5.15	K02706 photosystem II P680 reaction center D2 protein [EC:1.10.3.9] | (RefSeq) psbD, LyesC2p074; photosystem II protein D2 (A)	ko00195: Photosynthesis; ko01100: Metabolic pathways	--	--	--
Solyc09g059640.2	0.0433333	0	K02690 photosystem I P700 chlorophyll a apoprotein A2 | (RefSeq) psaB, LyesC2p070; photosystem I P700 apoprotein A2 (A)	ko00195: Photosynthesis; ko01100: Metabolic pathways	--	--	--
Solyc09g063130.3	141.73	165.757	K02693 photosystem I subunit IV | (RefSeq) photosystem I reaction center subunit IV B, chloroplastic (A)	ko00195: Photosynthesis; ko01100: Metabolic pathways	--	--	--
Solyc09g064400.2	0	0.38	K02697 photosystem I subunit IX | (RefSeq) psaJ, LyesC2p049; photosystem I subunit IX (A)	ko00195: Photosynthesis	--	--	--
Solyc09g064500.3	260.06	281.413	K08903 photosystem II 13kDa protein | (RefSeq) photosystem II reaction center Psb28 protein (A)	ko00195: Photosynthesis	--	--	--
Solyc09g064580.2	7.23667	3.41667	K02714 photosystem II PsbM protein | (RefSeq) psbM, LyesC2p075; photosystem II protein M (A)	ko00195: Photosynthesis	--	--	--
Solyc09g065910.2	1536.01	1982.66	K02721 photosystem II PsbW protein | (RefSeq) photosystem II reaction center W protein, chloroplastic (A)	ko00195: Photosynthesis	--	--	--
Solyc09g090140.3	584.497	562.3	K00025 malate dehydrogenase [EC:1.1.1.37] | (RefSeq) malate dehydrogenase (A)	ko00020: Citrate cycle (TCA cycle); ko00270: Cysteine and methionine metabolism; ko00620: Pyruvate metabolism; ko00630: Glyoxylate and dicarboxylate metabolism; ko00710: Carbon fixation in photosynthetic organisms; ko01100: Metabolic pathways; ko01110: Biosynthesis of secondary metabolites; ko01200: Carbon metabolism	--	--	--
Solyc09g091070.2	14.2533	19.78	K00026 malate dehydrogenase [EC:1.1.1.37] | (RefSeq) malate dehydrogenase, chloroplastic (A)	ko00020: Citrate cycle (TCA cycle); ko00270: Cysteine and methionine metabolism; ko00620: Pyruvate metabolism; ko00630: Glyoxylate and dicarboxylate metabolism; ko00710: Carbon fixation in photosynthetic organisms; ko01100: Metabolic pathways; ko01110: Biosynthesis of secondary metabolites; ko01200: Carbon metabolism	--	--	--
Solyc10g006230.3	2244.09	3372.82	K08908 light-harvesting complex I chlorophyll a/b binding protein 2 | (RefSeq) CAB7; chlorophyll a-b binding protein 7, chloroplastic (A)	ko00196: Photosynthesis - antenna proteins; ko01100: Metabolic pathways	--	--	--
Solyc10g006530.3	90.26	73.3	K08901 photosystem II oxygen-evolving enhancer protein 3 | (RefSeq) photosynthetic NDH subunit of lumenal location 3, chloroplastic (A)	ko00195: Photosynthesis	--	--	--
Solyc10g007290.3	4.02667	4.58667	K01595 phosphoenolpyruvate carboxylase [EC:4.1.1.31] | (RefSeq) phosphoenolpyruvate carboxylase (A)	ko00620: Pyruvate metabolism; ko00710: Carbon fixation in photosynthetic organisms; ko01100: Metabolic pathways; ko01200: Carbon metabolism	--	--	--
Solyc10g007690.3	2241.48	3114.74	K08909 light-harvesting complex I chlorophyll a/b binding protein 3 | (RefSeq) CAB-8; chlorophyll a-b binding protein 8, chloroplastic (A)	ko00196: Photosynthesis - antenna proteins; ko01100: Metabolic pathways	--	--	--
Solyc10g017890.1	3.04	2.43333	K02689 photosystem I P700 chlorophyll a apoprotein A1 | (RefSeq) psaA, LyesC2p069; photosystem I P700 apoprotein A1 (A)	ko00195: Photosynthesis; ko01100: Metabolic pathways	--	--	--
Solyc10g017910.2	0	0.226667	K02690 photosystem I P700 chlorophyll a apoprotein A2 | (RefSeq) psaB, LyesC2p070; photosystem I P700 apoprotein A2 (A)	ko00195: Photosynthesis; ko01100: Metabolic pathways	--	--	--
Solyc10g017930.1	0.803333	0.0933333	K03689 cytochrome b6-f complex subunit 8 | (RefSeq) petN, LyesC2p076; cytochrome b6/f complex subunit VIII (A)	ko00195: Photosynthesis; ko01100: Metabolic pathways	--	--	--
Solyc10g017940.1	0.38	0.38	K02705 photosystem II CP43 chlorophyll apoprotein | (RefSeq) psbC, LyesC2p073; photosystem II CP43 chlorophyll apoprotein (A)	ko00195: Photosynthesis; ko01100: Metabolic pathways	--	--	--
Solyc10g017950.2	1.49	4.41	K02724 photosystem II PsbZ protein | (RefSeq) psbZ, LyesC2p072; photosystem II protein Z (A)	ko00195: Photosynthesis	--	--	--
Solyc10g018300.2	897.963	874.33	K00615 transketolase [EC:2.2.1.1] | (RefSeq) transketolase, chloroplastic (A)	ko00030: Pentose phosphate pathway; ko00710: Carbon fixation in photosynthetic organisms; ko01100: Metabolic pathways; ko01110: Biosynthesis of secondary metabolites; ko01200: Carbon metabolism; ko01230: Biosynthesis of amino acids	--	--	--
Solyc10g044540.2	1.67667	1.28667	K02111 F-type H+/Na+-transporting ATPase subunit alpha [EC:7.1.2.2 7.2.2.1] | (RefSeq) atpA, LyesC2p084; ATP synthase CF1 alpha subunit (A)	ko00190: Oxidative phosphorylation; ko00195: Photosynthesis; ko01100: Metabolic pathways	--	--	--
Solyc10g044543.1	7.03	6.39	K02109 F-type H+-transporting ATPase subunit b | (RefSeq) atpF, LyesC2p083; ATP synthase CF0 subunit I (A)	ko00190: Oxidative phosphorylation; ko00195: Photosynthesis; ko01100: Metabolic pathways	--	--	--
Solyc10g047410.1	0.69	0.566667	K02705 photosystem II CP43 chlorophyll apoprotein | (RefSeq) psbC, LyesC2p073; photosystem II CP43 chlorophyll apoprotein (A)	ko00195: Photosynthesis; ko01100: Metabolic pathways	--	--	--
Solyc10g052740.2	1.02667	2.47	K02689 photosystem I P700 chlorophyll a apoprotein A1 | (RefSeq) psaA, LyesC2p069; photosystem I P700 apoprotein A1 (A)	ko00195: Photosynthesis; ko01100: Metabolic pathways	--	--	--
Solyc10g052790.1	1.02	0.783333	K02108 F-type H+-transporting ATPase subunit a | (RefSeq) atpI, LyesC2p081; ATP synthase CF0 subunit IV (A)	ko00190: Oxidative phosphorylation; ko00195: Photosynthesis; ko01100: Metabolic pathways	--	--	--
Solyc10g054380.2	0.823333	0.566667	K01623 fructose-bisphosphate aldolase, class I [EC:4.1.2.13] | (RefSeq) SlFBA1; fructose 1,6-bisphosphate aldolase 1 (A)	ko00010: Glycolysis / Gluconeogenesis; ko00030: Pentose phosphate pathway; ko00051: Fructose and mannose metabolism; ko00710: Carbon fixation in photosynthetic organisms; ko01100: Metabolic pathways; ko01110: Biosynthesis of secondary metabolites; ko01200: Carbon metabolism; ko01230: Biosynthesis of amino acids	--	--	--
Solyc10g054420.2	145.277	144.613	K02717 photosystem II oxygen-evolving enhancer protein 2 | (RefSeq) photosystem II reaction center PsbP family protein (A)	ko00195: Photosynthesis	--	--	--
Solyc10g054870.2	144.84	184.92	K01803 triosephosphate isomerase (TIM) [EC:5.3.1.1] | (RefSeq) triosephosphate isomerase, chloroplastic (A)	ko00010: Glycolysis / Gluconeogenesis; ko00051: Fructose and mannose metabolism; ko00562: Inositol phosphate metabolism; ko00710: Carbon fixation in photosynthetic organisms; ko01100: Metabolic pathways; ko01110: Biosynthesis of secondary metabolites; ko01200: Carbon metabolism; ko01230: Biosynthesis of amino acids	--	--	--
Solyc10g061830.2	2.25333	1.02333	K02705 photosystem II CP43 chlorophyll apoprotein | (RefSeq) psbC, LyesC2p073; photosystem II CP43 chlorophyll apoprotein (A)	ko00195: Photosynthesis; ko01100: Metabolic pathways	--	--	--
Solyc10g075160.1	1873.24	1359.59	K02639 ferredoxin | (RefSeq) ferredoxin (A)	ko00195: Photosynthesis	--	--	--
Solyc10g075170.2	0.13	0	K14455 aspartate aminotransferase, mitochondrial [EC:2.6.1.1] | (RefSeq) aspartate aminotransferase, mitochondrial-like (A)	ko00220: Arginine biosynthesis; ko00250: Alanine, aspartate and glutamate metabolism; ko00270: Cysteine and methionine metabolism; ko00330: Arginine and proline metabolism; ko00350: Tyrosine metabolism; ko00360: Phenylalanine metabolism; ko00400: Phenylalanine, tyrosine and tryptophan biosynthesis; ko00710: Carbon fixation in photosynthetic organisms; ko00950: Isoquinoline alkaloid biosynthesis; …	--	--	--
Solyc10g077120.2	2636.65	2963.18	K02723 photosystem II PsbY protein | (RefSeq) photosystem II core complex proteins psbY, chloroplastic (A)	ko00195: Photosynthesis	--	--	--
Solyc10g083570.2	38.5333	36.7833	K01623 fructose-bisphosphate aldolase, class I [EC:4.1.2.13] | (RefSeq) SlFBA8; fructose 1,6-bisphosphate aldolase (A)	ko00010: Glycolysis / Gluconeogenesis; ko00030: Pentose phosphate pathway; ko00051: Fructose and mannose metabolism; ko00710: Carbon fixation in photosynthetic organisms; ko01100: Metabolic pathways; ko01110: Biosynthesis of secondary metabolites; ko01200: Carbon metabolism; ko01230: Biosynthesis of amino acids	--	--	--
Solyc10g086720.2	1.64	2.19333	K03841 fructose-1,6-bisphosphatase I [EC:3.1.3.11] | (RefSeq) fructose-1,6-bisphosphatase 1, chloroplastic (A)	ko00010: Glycolysis / Gluconeogenesis; ko00030: Pentose phosphate pathway; ko00051: Fructose and mannose metabolism; ko00710: Carbon fixation in photosynthetic organisms; ko01100: Metabolic pathways; ko01110: Biosynthesis of secondary metabolites; ko01200: Carbon metabolism	--	--	--
Solyc10g086730.2	249.44	240.75	K03841 fructose-1,6-bisphosphatase I [EC:3.1.3.11] | (RefSeq) fructose-1,6-bisphosphatase, chloroplastic (A)	ko00010: Glycolysis / Gluconeogenesis; ko00030: Pentose phosphate pathway; ko00051: Fructose and mannose metabolism; ko00710: Carbon fixation in photosynthetic organisms; ko01100: Metabolic pathways; ko01110: Biosynthesis of secondary metabolites; ko01200: Carbon metabolism	--	--	--
Solyc11g006675.1	0.103333	0.123333	K02709 photosystem II PsbH protein | (RefSeq) psbH, LyesC2p041; photosystem II phosphoprotein (A)	ko00195: Photosynthesis	--	--	--
Solyc11g006910.2	6.56667	3.27667	K02639 ferredoxin | (RefSeq) ferredoxin, root R-B2 (A)	ko00195: Photosynthesis	--	--	--
Solyc11g007990.2	198.977	165.587	K00051 malate dehydrogenase (NADP+) [EC:1.1.1.82] | (RefSeq) chMDH; chloroplast malate dehydrogenase (A)	ko00620: Pyruvate metabolism; ko00710: Carbon fixation in photosynthetic organisms; ko01100: Metabolic pathways; ko01200: Carbon metabolism	--	--	--
Solyc11g008480.2	13.3533	12.93	K02717 photosystem II oxygen-evolving enhancer protein 2 | (RefSeq) photosystem II reaction center PsbP family protein (A)	ko00195: Photosynthesis	--	--	--
Solyc11g013730.2	0.0466667	0.06	K01601 ribulose-bisphosphate carboxylase large chain [EC:4.1.1.39] | (RefSeq) rbcL, LyesC2p061; ribulose-1,5-bisphosphate carboxylase/oxygenase large subunit (A)	ko00630: Glyoxylate and dicarboxylate metabolism; ko00710: Carbon fixation in photosynthetic organisms; ko01100: Metabolic pathways; ko01110: Biosynthesis of secondary metabolites; ko01200: Carbon metabolism	--	--	--
Solyc11g045260.1	0.55	1.23	K02705 photosystem II CP43 chlorophyll apoprotein | (RefSeq) psbC, LyesC2p073; photosystem II CP43 chlorophyll apoprotein (A)	ko00195: Photosynthesis; ko01100: Metabolic pathways	--	--	--
Solyc11g050770.1	0.0766667	0.0666667	K02724 photosystem II PsbZ protein | (RefSeq) psbZ, LyesC2p072; photosystem II protein Z (A)	ko00195: Photosynthesis	--	--	--
Solyc11g051170.2	55.5033	55.4567	K02111 F-type H+/Na+-transporting ATPase subunit alpha [EC:7.1.2.2 7.2.2.1] | (RefSeq) atpA, LyesC2p084; ATP synthase CF1 alpha subunit (A)	ko00190: Oxidative phosphorylation; ko00195: Photosynthesis; ko01100: Metabolic pathways	--	--	--
Solyc11g068430.2	23.59	14.3833	K02639 ferredoxin | (RefSeq) ferredoxin, root R-B1 (A)	ko00195: Photosynthesis	--	--	--
Solyc12g005070.2	2.36333	1.59	K02115 F-type H+-transporting ATPase subunit gamma | (RefSeq) ATP synthase gamma chain, chloroplastic-like (A)	ko00190: Oxidative phosphorylation; ko00195: Photosynthesis; ko01100: Metabolic pathways	--	--	--
Solyc12g005630.2	1989.4	2034.13	K02636 cytochrome b6-f complex iron-sulfur subunit [EC:7.1.1.6] | (RefSeq) cytochrome b6-f complex iron-sulfur subunit, chloroplastic (A)	ko00195: Photosynthesis; ko01100: Metabolic pathways	--	--	--
Solyc12g006140.2	1432.35	1789.53	K08913 light-harvesting complex II chlorophyll a/b binding protein 2 | (RefSeq) CAB5; chlorophyll a-b binding protein 5, chloroplastic (A)	ko00196: Photosynthesis - antenna proteins; ko01100: Metabolic pathways	--	--	--
Solyc12g008430.2	0.12	0.0966667	K00029 malate dehydrogenase (oxaloacetate-decarboxylating)(NADP+) [EC:1.1.1.40] | (RefSeq) NADP-dependent malic enzyme (A)	ko00620: Pyruvate metabolism; ko00710: Carbon fixation in photosynthetic organisms; ko01100: Metabolic pathways; ko01200: Carbon metabolism	--	--	--
Solyc12g009200.2	348.97	410.193	K08908 light-harvesting complex I chlorophyll a/b binding protein 2 | (RefSeq) photosystem I chlorophyll a/b-binding protein 6, chloroplastic (A)	ko00196: Photosynthesis - antenna proteins; ko01100: Metabolic pathways	--	--	--
Solyc12g011280.2	469.103	667.817	K08909 light-harvesting complex I chlorophyll a/b binding protein 3 | (RefSeq) chlorophyll a-b binding protein 8, chloroplastic-like (A)	ko00196: Photosynthesis - antenna proteins; ko01100: Metabolic pathways	--	--	--
Solyc12g011450.2	1446.31	2034.26	K08914 light-harvesting complex II chlorophyll a/b binding protein 3 | (RefSeq) CAB13; chlorophyll a-b binding protein 13, chloroplastic (A)	ko00196: Photosynthesis - antenna proteins; ko01100: Metabolic pathways	--	--	--
Solyc12g014250.2	50.48	56.79	K01595 phosphoenolpyruvate carboxylase [EC:4.1.1.31] | (RefSeq) phosphoenolpyruvate carboxylase (A)	ko00620: Pyruvate metabolism; ko00710: Carbon fixation in photosynthetic organisms; ko01100: Metabolic pathways; ko01200: Carbon metabolism	--	--	--
Solyc12g032990.2	0.723333	1.13667	K02690 photosystem I P700 chlorophyll a apoprotein A2 | (RefSeq) psaB, LyesC2p070; photosystem I P700 apoprotein A2 (A)	ko00195: Photosynthesis; ko01100: Metabolic pathways	--	--	--
Solyc12g033060.2	0.23	0.353333	K02690 photosystem I P700 chlorophyll a apoprotein A2 | (RefSeq) psaB, LyesC2p070; photosystem I P700 apoprotein A2 (A)	ko00195: Photosynthesis; ko01100: Metabolic pathways	--	--	--
Solyc12g038080.1	3.61	4.08	K02705 photosystem II CP43 chlorophyll apoprotein | (RefSeq) psbC, LyesC2p073; photosystem II CP43 chlorophyll apoprotein (A)	ko00195: Photosynthesis; ko01100: Metabolic pathways	--	--	--
Solyc12g039030.1	11.7133	9.95667	K02703 photosystem II P680 reaction center D1 protein [EC:1.10.3.9] | (RefSeq) psbA, LyesC2p089; photosystem II protein D1 (A)	ko00195: Photosynthesis; ko01100: Metabolic pathways	--	--	--
Solyc12g044280.2	242.21	397.767	K02695 photosystem I subunit VI | (RefSeq) photosystem I reaction center subunit VI, chloroplastic-like (A)	ko00195: Photosynthesis	--	--	--
Solyc12g044600.3	224.95	208.46	K00029 malate dehydrogenase (oxaloacetate-decarboxylating)(NADP+) [EC:1.1.1.40] | (RefSeq) ME1; NADP-dependent malic enzyme, chloroplastic (A)	ko00620: Pyruvate metabolism; ko00710: Carbon fixation in photosynthetic organisms; ko01100: Metabolic pathways; ko01200: Carbon metabolism	--	--	--
Solyc12g056530.2	81.2167	83.4133	K03841 fructose-1,6-bisphosphatase I [EC:3.1.3.11] | (RefSeq) fructose-1,6-bisphosphatase, cytosolic (A)	ko00010: Glycolysis / Gluconeogenesis; ko00030: Pentose phosphate pathway; ko00051: Fructose and mannose metabolism; ko00710: Carbon fixation in photosynthetic organisms; ko01100: Metabolic pathways; ko01110: Biosynthesis of secondary metabolites; ko01200: Carbon metabolism	--	--	--
Solyc12g056830.1	1696.59	1843.8	K02113 F-type H+-transporting ATPase subunit delta | (RefSeq) ATP synthase delta chain, chloroplastic (A)	ko00190: Oxidative phosphorylation; ko00195: Photosynthesis; ko01100: Metabolic pathways	--	--	--
Solyc12g094635.1	0.173333	0	K05298 glyceraldehyde-3-phosphate dehydrogenase (NADP+) (phosphorylating) [EC:1.2.1.13] | (RefSeq) glyceraldehyde-3-phosphate dehydrogenase B, chloroplastic-like (A)	ko00710: Carbon fixation in photosynthetic organisms; ko01100: Metabolic pathways; ko01200: Carbon metabolism	--	--	--
Solyc12g094640.2	587.36	552.703	K05298 glyceraldehyde-3-phosphate dehydrogenase (NADP+) (phosphorylating) [EC:1.2.1.13] | (RefSeq) glyceraldehyde-3-phosphate dehydrogenase B, chloroplastic-like (A)	ko00710: Carbon fixation in photosynthetic organisms; ko01100: Metabolic pathways; ko01200: Carbon metabolism	--	--	--
novel.100	1.61333	0.646667	K02705 photosystem II CP43 chlorophyll apoprotein | (RefSeq) psbC, LyesC2p073; photosystem II CP43 chlorophyll apoprotein (A)	ko00195: Photosynthesis; ko01100: Metabolic pathways	--	--	--
novel.1017	139.73	250.397	K08912 light-harvesting complex II chlorophyll a/b binding protein 1 | (RefSeq) chlorophyll a-b binding protein 1B, chloroplastic-like (A)	ko00196: Photosynthesis - antenna proteins; ko01100: Metabolic pathways	--	--	--
novel.1018	178.903	288.523	K08912 light-harvesting complex II chlorophyll a/b binding protein 1 | (RefSeq) chlorophyll a-b binding protein 1B, chloroplastic-like (A)	ko00196: Photosynthesis - antenna proteins; ko01100: Metabolic pathways	--	--	--
novel.1655	3.68667	2.91333	K02690 photosystem I P700 chlorophyll a apoprotein A2 | (RefSeq) psaB, LyesC2p070; photosystem I P700 apoprotein A2 (A)	ko00195: Photosynthesis; ko01100: Metabolic pathways	--	--	--
novel.1818	2.63333	2.05	K02111 F-type H+/Na+-transporting ATPase subunit alpha [EC:7.1.2.2 7.2.2.1] | (RefSeq) atpA, LyesC2p084; ATP synthase CF1 alpha subunit (A)	ko00190: Oxidative phosphorylation; ko00195: Photosynthesis; ko01100: Metabolic pathways	--	--	--
novel.1877	59.1833	63.15	K02707 photosystem II cytochrome b559 subunit alpha | (RefSeq) psbE, LyesC2p052; photosystem II cytochrome b559 alpha subunit (A)	ko00195: Photosynthesis; ko01100: Metabolic pathways	--	--	--
novel.2549	7.08333	8.26333	K02110 F-type H+-transporting ATPase subunit c | (RefSeq) atpH, LyesC2p082; ATP synthase CF0 subunit III (A)	ko00190: Oxidative phosphorylation; ko00195: Photosynthesis; ko01100: Metabolic pathways	--	--	--
novel.2568	6.14667	5.09	K02697 photosystem I subunit IX | (RefSeq) psaJ, LyesC2p049; photosystem I subunit IX (A)	ko00195: Photosynthesis	--	--	--
novel.2724	1.65333	1.89	K02703 photosystem II P680 reaction center D1 protein [EC:1.10.3.9] | (RefSeq) psbA, LyesC2p089; photosystem II protein D1 (A)	ko00195: Photosynthesis; ko01100: Metabolic pathways	--	--	--
novel.367	9.00333	8.3	K02110 F-type H+-transporting ATPase subunit c | (RefSeq) atpH, LyesC2p082; ATP synthase CF0 subunit III (A)	ko00190: Oxidative phosphorylation; ko00195: Photosynthesis; ko01100: Metabolic pathways	--	--	--
novel.368	2.79667	1.33667	K02108 F-type H+-transporting ATPase subunit a | (RefSeq) atpI, LyesC2p081; ATP synthase CF0 subunit IV (A)	ko00190: Oxidative phosphorylation; ko00195: Photosynthesis; ko01100: Metabolic pathways	--	--	--
novel.369	1.24	1.63	K02108 F-type H+-transporting ATPase subunit a | (RefSeq) atpI, LyesC2p081; ATP synthase CF0 subunit IV (A)	ko00190: Oxidative phosphorylation; ko00195: Photosynthesis; ko01100: Metabolic pathways	--	--	--
novel.761	2.27667	0.953333	K02709 photosystem II PsbH protein | (RefSeq) psbH, LyesC2p041; photosystem II phosphoprotein (A)	ko00195: Photosynthesis	--	--	--
novel.791	2.34333	4.26667	K02689 photosystem I P700 chlorophyll a apoprotein A1 | (RefSeq) psaA, LyesC2p069; photosystem I P700 apoprotein A1 (A)	ko00195: Photosynthesis; ko01100: Metabolic pathways	--	--	--
novel.796	1.08333	1.45	K02703 photosystem II P680 reaction center D1 protein [EC:1.10.3.9] | (RefSeq) psbA, LyesC2p089; photosystem II protein D1 (A)	ko00195: Photosynthesis; ko01100: Metabolic pathways	--	--	--
Solyc01g010135.1	1.96333	2.11	0.103938	K12126 phytochrome-interacting factor 3 | (RefSeq) transcription factor PIF3 isoform X1 (A)	ko04075: Plant hormone signal transduction; ko04712: Circadian rhythm - plant
Solyc01g086870.3	44.4067	49.5733	0.158788	K12126 phytochrome-interacting factor 3 | (RefSeq) transcription factor PIF3 isoform X1 (A)	ko04075: Plant hormone signal transduction; ko04712: Circadian rhythm - plant
Solyc01g102300.3	5.48	3.56333	-0.620948	K12126 phytochrome-interacting factor 3 | (RefSeq) transcription factor PIF3 isoform X1 (A)	ko04075: Plant hormone signal transduction; ko04712: Circadian rhythm - plant
Solyc01g109700.3	8.69667	9.65667	0.151063	K12126 phytochrome-interacting factor 3 | (RefSeq) transcription factor PIF3 isoform X1 (A)	ko04075: Plant hormone signal transduction; ko04712: Circadian rhythm - plant
Solyc03g034000.3	0.983333	1.18667	0.271162	K12126 phytochrome-interacting factor 3 | (RefSeq) transcription factor PIF3 isoform X1 (A)	ko04075: Plant hormone signal transduction; ko04712: Circadian rhythm - plant
Solyc03g113560.3	0.86	1.16333	0.435856	K12126 phytochrome-interacting factor 3 | (RefSeq) transcription factor PIF3 isoform X1 (A)	ko04075: Plant hormone signal transduction; ko04712: Circadian rhythm - plant
Solyc03g115540.2	2.85667	5.80667	1.02338	K12126 phytochrome-interacting factor 3 | (RefSeq) transcription factor PIF3 isoform X1 (A)	ko04075: Plant hormone signal transduction; ko04712: Circadian rhythm - plant
Solyc03g119390.3	0.373333	0.283333	-0.397964	K12126 phytochrome-interacting factor 3 | (RefSeq) transcription factor PIF3 isoform X1 (A)	ko04075: Plant hormone signal transduction; ko04712: Circadian rhythm - plant
Solyc03g121240.1	0.52	0.693333	0.415037	K12126 phytochrome-interacting factor 3 | (RefSeq) transcription factor PIF3 isoform X1 (A)	ko04075: Plant hormone signal transduction; ko04712: Circadian rhythm - plant
Solyc04g005130.3	0.986667	0.963333	-0.0345277	K12126 phytochrome-interacting factor 3 | (RefSeq) transcription factor PIF3 isoform X1 (A)	ko04075: Plant hormone signal transduction; ko04712: Circadian rhythm - plant
Solyc04g007300.3	0.15	0.0766667	-0.968291	K12126 phytochrome-interacting factor 3 | (RefSeq) transcription factor PIF3 isoform X1 (A)	ko04075: Plant hormone signal transduction; ko04712: Circadian rhythm - plant
Solyc04g007420.3	1.95	1.54333	-0.337424	K12126 phytochrome-interacting factor 3 | (RefSeq) transcription factor PIF3 isoform X1 (A)	ko04075: Plant hormone signal transduction; ko04712: Circadian rhythm - plant
Solyc04g077480.3	1.83333	2.46333	0.426143	K12126 phytochrome-interacting factor 3 | (RefSeq) transcription factor PIF3 isoform X1 (A)	ko04075: Plant hormone signal transduction; ko04712: Circadian rhythm - plant
Solyc04g078690.3	15.2733	14.7933	-0.0460678	K12126 phytochrome-interacting factor 3 | (RefSeq) transcription factor PIF3 isoform X1 (A)	ko04075: Plant hormone signal transduction; ko04712: Circadian rhythm - plant
Solyc04g078800.3	0.816667	0.516667	-0.660514	K12126 phytochrome-interacting factor 3 | (RefSeq) transcription factor PIF3 isoform X1 (A)	ko04075: Plant hormone signal transduction; ko04712: Circadian rhythm - plant
Solyc05g006650.3	40.97	53.2733	0.378846	K12126 phytochrome-interacting factor 3 | (RefSeq) transcription factor PIF3 isoform X1 (A)	ko04075: Plant hormone signal transduction; ko04712: Circadian rhythm - plant
Solyc05g010610.3	2.71333	1.56667	-0.792368	K12126 phytochrome-interacting factor 3 | (RefSeq) transcription factor PIF3 isoform X1 (A)	ko04075: Plant hormone signal transduction; ko04712: Circadian rhythm - plant
Solyc06g051260.3	11.2833	13.0633	0.21133	K12126 phytochrome-interacting factor 3 | (RefSeq) transcription factor PIF3 isoform X1 (A)	ko04075: Plant hormone signal transduction; ko04712: Circadian rhythm - plant
Solyc06g065040.3	11.9	9.10333	-0.386495	K12126 phytochrome-interacting factor 3 | (RefSeq) transcription factor PIF3 isoform X1 (A)	ko04075: Plant hormone signal transduction; ko04712: Circadian rhythm - plant
Solyc06g069600.2	8.7	13.6633	0.651222	K12126 phytochrome-interacting factor 3 | (RefSeq) transcription factor PIF3 isoform X1 (A)	ko04075: Plant hormone signal transduction; ko04712: Circadian rhythm - plant
Solyc06g083170.3	0.846667	0.87	0.0392213	K12126 phytochrome-interacting factor 3 | (RefSeq) transcription factor PIF3 isoform X1 (A)	ko04075: Plant hormone signal transduction; ko04712: Circadian rhythm - plant
Solyc07g005400.3	3.65333	3.77667	0.0479001	K12126 phytochrome-interacting factor 3 | (RefSeq) transcription factor PIF3 isoform X1 (A)	ko04075: Plant hormone signal transduction; ko04712: Circadian rhythm - plant
Solyc09g057710.3	0.806667	0.71	-0.184154	K12126 phytochrome-interacting factor 3 | (RefSeq) transcription factor PIF3 isoform X1 (A)	ko04075: Plant hormone signal transduction; ko04712: Circadian rhythm - plant
Solyc09g063015.1	21.93	17.24	-0.347146	K12126 phytochrome-interacting factor 3 | (RefSeq) transcription factor PIF3 isoform X1 (A)	ko04075: Plant hormone signal transduction; ko04712: Circadian rhythm - plant
Solyc09g065820.3	21.7833	22.83	0.0677061	K12126 phytochrome-interacting factor 3 | (RefSeq) transcription factor PIF3 isoform X1 (A)	ko04075: Plant hormone signal transduction; ko04712: Circadian rhythm - plant
Solyc09g083220.3	24.73	23.59	-0.0680868	K12126 phytochrome-interacting factor 3 | (RefSeq) transcription factor PIF3 isoform X1 (A)	ko04075: Plant hormone signal transduction; ko04712: Circadian rhythm - plant
Solyc09g097870.3	14.7867	18.3267	0.309648	K12126 phytochrome-interacting factor 3 | (RefSeq) transcription factor PIF3 isoform X1 (A)	ko04075: Plant hormone signal transduction; ko04712: Circadian rhythm - plant
Solyc09g098110.3	4.12333	6.18333	0.584574	K12126 phytochrome-interacting factor 3 | (RefSeq) transcription factor PIF3 isoform X1 (A)	ko04075: Plant hormone signal transduction; ko04712: Circadian rhythm - plant
Solyc10g018510.2	0.186667	0.756667	2.01919	K12126 phytochrome-interacting factor 3 | (RefSeq) transcription factor PIF3 isoform X1 (A)	ko04075: Plant hormone signal transduction; ko04712: Circadian rhythm - plant
Solyc10g049780.1	0	0.0233333	#DIV/0!	K12126 phytochrome-interacting factor 3 | (RefSeq) transcription factor PIF3 isoform X1 (A)	ko04075: Plant hormone signal transduction; ko04712: Circadian rhythm - plant
Solyc10g079050.2	2.67667	2.93333	0.132104	K12126 phytochrome-interacting factor 3 | (RefSeq) transcription factor PIF3 isoform X1 (A)	ko04075: Plant hormone signal transduction; ko04712: Circadian rhythm - plant
Solyc10g079070.2	13.43	17.0433	0.343748	K12126 phytochrome-interacting factor 3 | (RefSeq) transcription factor PIF3 isoform X1 (A)	ko04075: Plant hormone signal transduction; ko04712: Circadian rhythm - plant
Solyc11g056650.2	2.55	1.80333	-0.499831	K12126 phytochrome-interacting factor 3 | (RefSeq) transcription factor PIF3 isoform X1 (A)	ko04075: Plant hormone signal transduction; ko04712: Circadian rhythm - plant
Solyc12g036470.2	6.11	6.66667	0.125793	K12126 phytochrome-interacting factor 3 | (RefSeq) transcription factor PIF3 isoform X1 (A)	ko04075: Plant hormone signal transduction; ko04712: Circadian rhythm - plant
Solyc12g098620.2	0.0833333	0.61	2.87184	K12126 phytochrome-interacting factor 3 | (RefSeq) transcription factor PIF3 isoform X1 (A)	ko04075: Plant hormone signal transduction; ko04712: Circadian rhythm - plant
Solyc12g100140.2	4.29	5.26667	0.295913	K12126 phytochrome-interacting factor 3 | (RefSeq) transcription factor PIF3 isoform X1 (A)	ko04075: Plant hormone signal transduction; ko04712: Circadian rhythm - plant
Solyc03g123800.2	59.6867	63.3933	0.0869224	K13413 mitogen-activated protein kinase kinase 4/5 [EC:2.7.12.2] | (RefSeq) MKK2; mitogen-activated protein kinase kinase 2 (A)	ko04016: MAPK signaling pathway - plant; ko04075: Plant hormone signal transduction; ko04626: Plant-pathogen interaction
Solyc00g009090.3	0.136667	0.203333	0.573185	K13415 protein brassinosteroid insensitive 1 [EC:2.7.10.1 2.7.11.1] | (RefSeq) CURL3; brassinosteroid LRR receptor kinase precursor (A)	ko04075: Plant hormone signal transduction
Solyc00g110870.3	0.873333	2.19333	1.32852	K13415 protein brassinosteroid insensitive 1 [EC:2.7.10.1 2.7.11.1] | (RefSeq) CURL3; brassinosteroid LRR receptor kinase precursor (A)	ko04075: Plant hormone signal transduction
Solyc01g008140.3	8.44667	7.37333	-0.196065	K13415 protein brassinosteroid insensitive 1 [EC:2.7.10.1 2.7.11.1] | (RefSeq) CURL3; brassinosteroid LRR receptor kinase precursor (A)	ko04075: Plant hormone signal transduction
Solyc01g067020.3	24.0333	22.26	-0.110583	K13415 protein brassinosteroid insensitive 1 [EC:2.7.10.1 2.7.11.1] | (RefSeq) CURL3; brassinosteroid LRR receptor kinase precursor (A)	ko04075: Plant hormone signal transduction
Solyc01g080770.3	3.47	3.79667	0.129798	K13415 protein brassinosteroid insensitive 1 [EC:2.7.10.1 2.7.11.1] | (RefSeq) CURL3; brassinosteroid LRR receptor kinase precursor (A)	ko04075: Plant hormone signal transduction
Solyc01g102870.2	1.07333	0.67	-0.679865	K13415 protein brassinosteroid insensitive 1 [EC:2.7.10.1 2.7.11.1] | (RefSeq) CURL3; brassinosteroid LRR receptor kinase precursor (A)	ko04075: Plant hormone signal transduction
Solyc01g105080.2	0.16	0	#NUM!	K13415 protein brassinosteroid insensitive 1 [EC:2.7.10.1 2.7.11.1] | (RefSeq) CURL3; brassinosteroid LRR receptor kinase precursor (A)	ko04075: Plant hormone signal transduction
Solyc01g109650.3	1.55667	1.25333	-0.31269	K13415 protein brassinosteroid insensitive 1 [EC:2.7.10.1 2.7.11.1] | (RefSeq) CURL3; brassinosteroid LRR receptor kinase precursor (A)	ko04075: Plant hormone signal transduction
Solyc02g023950.3	1.36333	1.36667	0.00352307	K13415 protein brassinosteroid insensitive 1 [EC:2.7.10.1 2.7.11.1] | (RefSeq) CURL3; brassinosteroid LRR receptor kinase precursor (A)	ko04075: Plant hormone signal transduction
Solyc02g067560.1	1.37333	2.02	0.556673	K13415 protein brassinosteroid insensitive 1 [EC:2.7.10.1 2.7.11.1] | (RefSeq) CURL3; brassinosteroid LRR receptor kinase precursor (A)	ko04075: Plant hormone signal transduction
Solyc02g072520.3	14.6967	12.45	-0.239343	K13415 protein brassinosteroid insensitive 1 [EC:2.7.10.1 2.7.11.1] | (RefSeq) CURL3; brassinosteroid LRR receptor kinase precursor (A)	ko04075: Plant hormone signal transduction
Solyc02g077630.3	3.27	3.78667	0.211638	K13415 protein brassinosteroid insensitive 1 [EC:2.7.10.1 2.7.11.1] | (RefSeq) CURL3; brassinosteroid LRR receptor kinase precursor (A)	ko04075: Plant hormone signal transduction
Solyc02g087470.3	0.66	0.933333	0.499926	K13415 protein brassinosteroid insensitive 1 [EC:2.7.10.1 2.7.11.1] | (RefSeq) CURL3; brassinosteroid LRR receptor kinase precursor (A)	ko04075: Plant hormone signal transduction
Solyc03g006300.2	0.563333	0.67	0.250172	K13415 protein brassinosteroid insensitive 1 [EC:2.7.10.1 2.7.11.1] | (RefSeq) CURL3; brassinosteroid LRR receptor kinase precursor (A)	ko04075: Plant hormone signal transduction
Solyc03g026040.3	0.0633333	0.31	2.29123	K13415 protein brassinosteroid insensitive 1 [EC:2.7.10.1 2.7.11.1] | (RefSeq) CURL3; brassinosteroid LRR receptor kinase precursor (A)	ko04075: Plant hormone signal transduction
Solyc03g059490.1	11.45	11.75	0.0373132	K13415 protein brassinosteroid insensitive 1 [EC:2.7.10.1 2.7.11.1] | (RefSeq) CURL3; brassinosteroid LRR receptor kinase precursor (A)	ko04075: Plant hormone signal transduction
Solyc03g062660.3	0.723333	0.83	0.198451	K13415 protein brassinosteroid insensitive 1 [EC:2.7.10.1 2.7.11.1] | (RefSeq) CURL3; brassinosteroid LRR receptor kinase precursor (A)	ko04075: Plant hormone signal transduction
Solyc03g093330.3	0.72	0.826667	0.199309	K13415 protein brassinosteroid insensitive 1 [EC:2.7.10.1 2.7.11.1] | (RefSeq) CURL3; brassinosteroid LRR receptor kinase precursor (A)	ko04075: Plant hormone signal transduction
Solyc03g111793.1	30.0667	29.3067	-0.036936	K13415 protein brassinosteroid insensitive 1 [EC:2.7.10.1 2.7.11.1] | (RefSeq) CURL3; brassinosteroid LRR receptor kinase precursor (A)	ko04075: Plant hormone signal transduction
Solyc03g114080.2	0.276667	0.283333	0.0343515	K13415 protein brassinosteroid insensitive 1 [EC:2.7.10.1 2.7.11.1] | (RefSeq) CURL3; brassinosteroid LRR receptor kinase precursor (A)	ko04075: Plant hormone signal transduction
Solyc03g115610.3	8.74667	4.72	-0.889946	K13415 protein brassinosteroid insensitive 1 [EC:2.7.10.1 2.7.11.1] | (RefSeq) CURL3; brassinosteroid LRR receptor kinase precursor (A)	ko04075: Plant hormone signal transduction
Solyc03g117550.1	1.22333	1.21333	-0.0118416	K13415 protein brassinosteroid insensitive 1 [EC:2.7.10.1 2.7.11.1] | (RefSeq) CURL3; brassinosteroid LRR receptor kinase precursor (A)	ko04075: Plant hormone signal transduction
Solyc03g118510.3	5.67333	8.81333	0.635491	K13415 protein brassinosteroid insensitive 1 [EC:2.7.10.1 2.7.11.1] | (RefSeq) CURL3; brassinosteroid LRR receptor kinase precursor (A)	ko04075: Plant hormone signal transduction
Solyc03g123780.3	3.47	2.98667	-0.216399	K13415 protein brassinosteroid insensitive 1 [EC:2.7.10.1 2.7.11.1] | (RefSeq) CURL3; brassinosteroid LRR receptor kinase precursor (A)	ko04075: Plant hormone signal transduction
Solyc03g124050.3	0	0.04	#DIV/0!	K13415 protein brassinosteroid insensitive 1 [EC:2.7.10.1 2.7.11.1] | (RefSeq) CURL3; brassinosteroid LRR receptor kinase precursor (A)	ko04075: Plant hormone signal transduction
Solyc04g008430.1	0.396667	0.373333	-0.0874628	K13415 protein brassinosteroid insensitive 1 [EC:2.7.10.1 2.7.11.1] | (RefSeq) CURL3; brassinosteroid LRR receptor kinase precursor (A)	ko04075: Plant hormone signal transduction
Solyc04g008650.3	0.856667	1.17333	0.453807	K13415 protein brassinosteroid insensitive 1 [EC:2.7.10.1 2.7.11.1] | (RefSeq) CURL3; brassinosteroid LRR receptor kinase precursor (A)	ko04075: Plant hormone signal transduction
Solyc04g015600.3	2.66333	3.24	0.282761	K13415 protein brassinosteroid insensitive 1 [EC:2.7.10.1 2.7.11.1] | (RefSeq) CURL3; brassinosteroid LRR receptor kinase precursor (A)	ko04075: Plant hormone signal transduction
Solyc04g051510.1	21.63	21.0867	-0.0367026	K13415 protein brassinosteroid insensitive 1 [EC:2.7.10.1 2.7.11.1] | (RefSeq) CURL3; brassinosteroid LRR receptor kinase precursor (A)	ko04075: Plant hormone signal transduction
Solyc04g064940.3	0.396667	0.856667	1.11081	K13415 protein brassinosteroid insensitive 1 [EC:2.7.10.1 2.7.11.1] | (RefSeq) CURL3; brassinosteroid LRR receptor kinase precursor (A)	ko04075: Plant hormone signal transduction
Solyc04g071870.1	23.5367	19.2067	-0.293303	K13415 protein brassinosteroid insensitive 1 [EC:2.7.10.1 2.7.11.1] | (RefSeq) CURL3; brassinosteroid LRR receptor kinase precursor (A)	ko04075: Plant hormone signal transduction
Solyc04g078590.3	0.186667	0.416667	1.15843	K13415 protein brassinosteroid insensitive 1 [EC:2.7.10.1 2.7.11.1] | (RefSeq) CURL3; brassinosteroid LRR receptor kinase precursor (A)	ko04075: Plant hormone signal transduction
Solyc04g079690.3	0.2	0.336667	0.751321	K13415 protein brassinosteroid insensitive 1 [EC:2.7.10.1 2.7.11.1] | (RefSeq) CURL3; brassinosteroid LRR receptor kinase precursor (A)	ko04075: Plant hormone signal transduction
Solyc05g006570.1	0.46	0.826667	0.845672	K13415 protein brassinosteroid insensitive 1 [EC:2.7.10.1 2.7.11.1] | (RefSeq) CURL3; brassinosteroid LRR receptor kinase precursor (A)	ko04075: Plant hormone signal transduction
Solyc05g008860.3	3.84667	4.62	0.264284	K13415 protein brassinosteroid insensitive 1 [EC:2.7.10.1 2.7.11.1] | (RefSeq) CURL3; brassinosteroid LRR receptor kinase precursor (A)	ko04075: Plant hormone signal transduction
Solyc05g009100.3	0.986667	1.26667	0.360402	K13415 protein brassinosteroid insensitive 1 [EC:2.7.10.1 2.7.11.1] | (RefSeq) CURL3; brassinosteroid LRR receptor kinase precursor (A)	ko04075: Plant hormone signal transduction
Solyc05g023760.3	4.12667	4.73	0.196863	K13415 protein brassinosteroid insensitive 1 [EC:2.7.10.1 2.7.11.1] | (RefSeq) CURL3; brassinosteroid LRR receptor kinase precursor (A)	ko04075: Plant hormone signal transduction
Solyc05g051640.3	1.44	2.15667	0.582734	K13415 protein brassinosteroid insensitive 1 [EC:2.7.10.1 2.7.11.1] | (RefSeq) CURL3; brassinosteroid LRR receptor kinase precursor (A)	ko04075: Plant hormone signal transduction
Solyc05g052350.3	5.26667	5.35	0.0226487	K13415 protein brassinosteroid insensitive 1 [EC:2.7.10.1 2.7.11.1] | (RefSeq) CURL3; brassinosteroid LRR receptor kinase precursor (A)	ko04075: Plant hormone signal transduction
Solyc06g050560.3	0.243333	0.393333	0.692818	K13415 protein brassinosteroid insensitive 1 [EC:2.7.10.1 2.7.11.1] | (RefSeq) CURL3; brassinosteroid LRR receptor kinase precursor (A)	ko04075: Plant hormone signal transduction
Solyc06g065260.3	9.78	10.0233	0.035456	K13415 protein brassinosteroid insensitive 1 [EC:2.7.10.1 2.7.11.1] | (RefSeq) CURL3; brassinosteroid LRR receptor kinase precursor (A)	ko04075: Plant hormone signal transduction
Solyc06g069650.3	0.0666667	0.00666667	-3.32193	K13415 protein brassinosteroid insensitive 1 [EC:2.7.10.1 2.7.11.1] | (RefSeq) CURL3; brassinosteroid LRR receptor kinase precursor (A)	ko04075: Plant hormone signal transduction
Solyc06g071810.1	121.763	111.647	-0.12514	K13415 protein brassinosteroid insensitive 1 [EC:2.7.10.1 2.7.11.1] | (RefSeq) CURL3; brassinosteroid LRR receptor kinase precursor (A)	ko04075: Plant hormone signal transduction
Solyc06g082920.3	26.69	21.1167	-0.337917	K13415 protein brassinosteroid insensitive 1 [EC:2.7.10.1 2.7.11.1] | (RefSeq) CURL3; brassinosteroid LRR receptor kinase precursor (A)	ko04075: Plant hormone signal transduction
Solyc07g005540.1	2.58667	4.87333	0.913815	K13415 protein brassinosteroid insensitive 1 [EC:2.7.10.1 2.7.11.1] | (RefSeq) CURL3; brassinosteroid LRR receptor kinase precursor (A)	ko04075: Plant hormone signal transduction
Solyc07g017230.3	0.01	0	#NUM!	K13415 protein brassinosteroid insensitive 1 [EC:2.7.10.1 2.7.11.1] | (RefSeq) CURL3; brassinosteroid LRR receptor kinase precursor (A)	ko04075: Plant hormone signal transduction
Solyc07g062040.3	0.136667	0.143333	0.0687128	K13415 protein brassinosteroid insensitive 1 [EC:2.7.10.1 2.7.11.1] | (RefSeq) CURL3; brassinosteroid LRR receptor kinase precursor (A)	ko04075: Plant hormone signal transduction
Solyc07g063000.3	3.02667	2.93	-0.0468291	K13415 protein brassinosteroid insensitive 1 [EC:2.7.10.1 2.7.11.1] | (RefSeq) CURL3; brassinosteroid LRR receptor kinase precursor (A)	ko04075: Plant hormone signal transduction
Solyc07g065240.2	0.77	0.55	-0.485427	K13415 protein brassinosteroid insensitive 1 [EC:2.7.10.1 2.7.11.1] | (RefSeq) CURL3; brassinosteroid LRR receptor kinase precursor (A)	ko04075: Plant hormone signal transduction
Solyc07g066230.3	0.97	0.876667	-0.145956	K13415 protein brassinosteroid insensitive 1 [EC:2.7.10.1 2.7.11.1] | (RefSeq) CURL3; brassinosteroid LRR receptor kinase precursor (A)	ko04075: Plant hormone signal transduction
Solyc08g066490.3	1.77	2.12667	0.264845	K13415 protein brassinosteroid insensitive 1 [EC:2.7.10.1 2.7.11.1] | (RefSeq) CURL3; brassinosteroid LRR receptor kinase precursor (A)	ko04075: Plant hormone signal transduction
Solyc08g069170.2	0.02	0	#NUM!	K13415 protein brassinosteroid insensitive 1 [EC:2.7.10.1 2.7.11.1] | (RefSeq) CURL3; brassinosteroid LRR receptor kinase precursor (A)	ko04075: Plant hormone signal transduction
Solyc08g082460.3	0.09	0.1	0.152003	K13415 protein brassinosteroid insensitive 1 [EC:2.7.10.1 2.7.11.1] | (RefSeq) CURL3; brassinosteroid LRR receptor kinase precursor (A)	ko04075: Plant hormone signal transduction
Solyc09g008860.3	2.77667	3.46667	0.320195	K13415 protein brassinosteroid insensitive 1 [EC:2.7.10.1 2.7.11.1] | (RefSeq) CURL3; brassinosteroid LRR receptor kinase precursor (A)	ko04075: Plant hormone signal transduction
Solyc09g015170.3	2.36	2.85333	0.273861	K13415 protein brassinosteroid insensitive 1 [EC:2.7.10.1 2.7.11.1] | (RefSeq) CURL3; brassinosteroid LRR receptor kinase precursor (A)	ko04075: Plant hormone signal transduction
Solyc09g061930.3	1.36	1.26	-0.110183	K13415 protein brassinosteroid insensitive 1 [EC:2.7.10.1 2.7.11.1] | (RefSeq) CURL3; brassinosteroid LRR receptor kinase precursor (A)	ko04075: Plant hormone signal transduction
Solyc09g098420.2	0.04	0	#NUM!	K13415 protein brassinosteroid insensitive 1 [EC:2.7.10.1 2.7.11.1] | (RefSeq) CURL3; brassinosteroid LRR receptor kinase precursor (A)	ko04075: Plant hormone signal transduction
Solyc10g079170.2	0.833333	1.01333	0.282143	K13415 protein brassinosteroid insensitive 1 [EC:2.7.10.1 2.7.11.1] | (RefSeq) CURL3; brassinosteroid LRR receptor kinase precursor (A)	ko04075: Plant hormone signal transduction
Solyc11g011020.2	4.72	5.89	0.319481	K13415 protein brassinosteroid insensitive 1 [EC:2.7.10.1 2.7.11.1] | (RefSeq) CURL3; brassinosteroid LRR receptor kinase precursor (A)	ko04075: Plant hormone signal transduction
Solyc11g011875.1	0.41	0	#NUM!	K13415 protein brassinosteroid insensitive 1 [EC:2.7.10.1 2.7.11.1] | (RefSeq) CURL3; brassinosteroid LRR receptor kinase precursor (A)	ko04075: Plant hormone signal transduction
Solyc11g017270.2	50.36	43.8667	-0.199153	K13415 protein brassinosteroid insensitive 1 [EC:2.7.10.1 2.7.11.1] | (RefSeq) CURL3; brassinosteroid LRR receptor kinase precursor (A)	ko04075: Plant hormone signal transduction
Solyc11g069960.2	74.3867	90.2767	0.279309	K13415 protein brassinosteroid insensitive 1 [EC:2.7.10.1 2.7.11.1] | (RefSeq) CURL3; brassinosteroid LRR receptor kinase precursor (A)	ko04075: Plant hormone signal transduction
Solyc12g089160.2	27.04	25.1967	-0.101862	K13415 protein brassinosteroid insensitive 1 [EC:2.7.10.1 2.7.11.1] | (RefSeq) CURL3; brassinosteroid LRR receptor kinase precursor (A)	ko04075: Plant hormone signal transduction
Solyc12g096710.2	34.5867	32.08	-0.108542	K13415 protein brassinosteroid insensitive 1 [EC:2.7.10.1 2.7.11.1] | (RefSeq) CURL3; brassinosteroid LRR receptor kinase precursor (A)	ko04075: Plant hormone signal transduction
Solyc12g096720.2	3.15667	6.87333	1.12261	K13415 protein brassinosteroid insensitive 1 [EC:2.7.10.1 2.7.11.1] | (RefSeq) CURL3; brassinosteroid LRR receptor kinase precursor (A)	ko04075: Plant hormone signal transduction
Solyc01g104050.3	17.1267	20.18	0.236682	K13416 brassinosteroid insensitive 1-associated receptor kinase 1 [EC:2.7.10.1 2.7.11.1] | (RefSeq) SERK3A; somatic embryogenesis receptor kinase 3A precursor (A)	ko04016: MAPK signaling pathway - plant; ko04075: Plant hormone signal transduction; ko04626: Plant-pathogen interaction
Solyc02g071810.3	1.60667	2.34	0.542438	K13416 brassinosteroid insensitive 1-associated receptor kinase 1 [EC:2.7.10.1 2.7.11.1] | (RefSeq) SERK3A; somatic embryogenesis receptor kinase 3A precursor (A)	ko04016: MAPK signaling pathway - plant; ko04075: Plant hormone signal transduction; ko04626: Plant-pathogen interaction
Solyc02g071820.3	1.15667	2.19667	0.925343	K13416 brassinosteroid insensitive 1-associated receptor kinase 1 [EC:2.7.10.1 2.7.11.1] | (RefSeq) SERK3A; somatic embryogenesis receptor kinase 3A precursor (A)	ko04016: MAPK signaling pathway - plant; ko04075: Plant hormone signal transduction; ko04626: Plant-pathogen interaction
Solyc02g071860.3	36.14	35.8433	-0.0118917	K13416 brassinosteroid insensitive 1-associated receptor kinase 1 [EC:2.7.10.1 2.7.11.1] | (RefSeq) SERK3A; somatic embryogenesis receptor kinase 3A precursor (A)	ko04016: MAPK signaling pathway - plant; ko04075: Plant hormone signal transduction; ko04626: Plant-pathogen interaction
Solyc02g071880.3	2.60667	3.18333	0.288332	K13416 brassinosteroid insensitive 1-associated receptor kinase 1 [EC:2.7.10.1 2.7.11.1] | (RefSeq) SERK3A; somatic embryogenesis receptor kinase 3A precursor (A)	ko04016: MAPK signaling pathway - plant; ko04075: Plant hormone signal transduction; ko04626: Plant-pathogen interaction
Solyc02g078170.2	3.42	2.96667	-0.205153	K13416 brassinosteroid insensitive 1-associated receptor kinase 1 [EC:2.7.10.1 2.7.11.1] | (RefSeq) SERK3A; somatic embryogenesis receptor kinase 3A precursor (A)	ko04016: MAPK signaling pathway - plant; ko04075: Plant hormone signal transduction; ko04626: Plant-pathogen interaction
Solyc02g078750.3	2.38	1.86	-0.355659	K13416 brassinosteroid insensitive 1-associated receptor kinase 1 [EC:2.7.10.1 2.7.11.1] | (RefSeq) SERK3A; somatic embryogenesis receptor kinase 3A precursor (A)	ko04016: MAPK signaling pathway - plant; ko04075: Plant hormone signal transduction; ko04626: Plant-pathogen interaction
Solyc02g081470.3	0.426667	0.733333	0.78136	K13416 brassinosteroid insensitive 1-associated receptor kinase 1 [EC:2.7.10.1 2.7.11.1] | (RefSeq) SERK3A; somatic embryogenesis receptor kinase 3A precursor (A)	ko04016: MAPK signaling pathway - plant; ko04075: Plant hormone signal transduction; ko04626: Plant-pathogen interaction
Solyc02g081510.2	0.546667	1.03333	0.918572	K13416 brassinosteroid insensitive 1-associated receptor kinase 1 [EC:2.7.10.1 2.7.11.1] | (RefSeq) SERK3A; somatic embryogenesis receptor kinase 3A precursor (A)	ko04016: MAPK signaling pathway - plant; ko04075: Plant hormone signal transduction; ko04626: Plant-pathogen interaction
Solyc02g085430.3	0.306667	0.223333	-0.457473	K13416 brassinosteroid insensitive 1-associated receptor kinase 1 [EC:2.7.10.1 2.7.11.1] | (RefSeq) SERK3A; somatic embryogenesis receptor kinase 3A precursor (A)	ko04016: MAPK signaling pathway - plant; ko04075: Plant hormone signal transduction; ko04626: Plant-pathogen interaction
Solyc02g092940.3	12.9833	12.69	-0.0329688	K13416 brassinosteroid insensitive 1-associated receptor kinase 1 [EC:2.7.10.1 2.7.11.1] | (RefSeq) SERK3A; somatic embryogenesis receptor kinase 3A precursor (A)	ko04016: MAPK signaling pathway - plant; ko04075: Plant hormone signal transduction; ko04626: Plant-pathogen interaction
Solyc03g007790.3	0.13	0.0866667	-0.584963	K13416 brassinosteroid insensitive 1-associated receptor kinase 1 [EC:2.7.10.1 2.7.11.1] | (RefSeq) SERK3A; somatic embryogenesis receptor kinase 3A precursor (A)	ko04016: MAPK signaling pathway - plant; ko04075: Plant hormone signal transduction; ko04626: Plant-pathogen interaction
Solyc03g034060.3	0.1	0.09	-0.152003	K13416 brassinosteroid insensitive 1-associated receptor kinase 1 [EC:2.7.10.1 2.7.11.1] | (RefSeq) SERK3A; somatic embryogenesis receptor kinase 3A precursor (A)	ko04016: MAPK signaling pathway - plant; ko04075: Plant hormone signal transduction; ko04626: Plant-pathogen interaction
Solyc03g078360.2	7.27	8.11667	0.158932	K13416 brassinosteroid insensitive 1-associated receptor kinase 1 [EC:2.7.10.1 2.7.11.1] | (RefSeq) SERK3A; somatic embryogenesis receptor kinase 3A precursor (A)	ko04016: MAPK signaling pathway - plant; ko04075: Plant hormone signal transduction; ko04626: Plant-pathogen interaction
Solyc03g080060.1	31.33	29.4267	-0.0904206	K13416 brassinosteroid insensitive 1-associated receptor kinase 1 [EC:2.7.10.1 2.7.11.1] | (RefSeq) SERK3A; somatic embryogenesis receptor kinase 3A precursor (A)	ko04016: MAPK signaling pathway - plant; ko04075: Plant hormone signal transduction; ko04626: Plant-pathogen interaction
Solyc03g083510.3	0.29	0.526667	0.860837	K13416 brassinosteroid insensitive 1-associated receptor kinase 1 [EC:2.7.10.1 2.7.11.1] | (RefSeq) SERK3A; somatic embryogenesis receptor kinase 3A precursor (A)	ko04016: MAPK signaling pathway - plant; ko04075: Plant hormone signal transduction; ko04626: Plant-pathogen interaction
Solyc03g095490.3	7.17667	8.02	0.160288	K13416 brassinosteroid insensitive 1-associated receptor kinase 1 [EC:2.7.10.1 2.7.11.1] | (RefSeq) SERK3A; somatic embryogenesis receptor kinase 3A precursor (A)	ko04016: MAPK signaling pathway - plant; ko04075: Plant hormone signal transduction; ko04626: Plant-pathogen interaction
Solyc03g111670.3	30.7	34.27	0.158708	K13416 brassinosteroid insensitive 1-associated receptor kinase 1 [EC:2.7.10.1 2.7.11.1] | (RefSeq) SERK3A; somatic embryogenesis receptor kinase 3A precursor (A)	ko04016: MAPK signaling pathway - plant; ko04075: Plant hormone signal transduction; ko04626: Plant-pathogen interaction
Solyc03g116760.3	12.1667	13.06	0.102221	K13416 brassinosteroid insensitive 1-associated receptor kinase 1 [EC:2.7.10.1 2.7.11.1] | (RefSeq) SERK3A; somatic embryogenesis receptor kinase 3A precursor (A)	ko04016: MAPK signaling pathway - plant; ko04075: Plant hormone signal transduction; ko04626: Plant-pathogen interaction
Solyc04g015460.3	0.806667	1.02	0.338525	K13416 brassinosteroid insensitive 1-associated receptor kinase 1 [EC:2.7.10.1 2.7.11.1] | (RefSeq) SERK3A; somatic embryogenesis receptor kinase 3A precursor (A)	ko04016: MAPK signaling pathway - plant; ko04075: Plant hormone signal transduction; ko04626: Plant-pathogen interaction
Solyc05g005070.3	9.67	10.0467	0.0551291	K13416 brassinosteroid insensitive 1-associated receptor kinase 1 [EC:2.7.10.1 2.7.11.1] | (RefSeq) SERK3A; somatic embryogenesis receptor kinase 3A precursor (A)	ko04016: MAPK signaling pathway - plant; ko04075: Plant hormone signal transduction; ko04626: Plant-pathogen interaction
Solyc05g005125.1	5.16333	5.2	0.0102089	K13416 brassinosteroid insensitive 1-associated receptor kinase 1 [EC:2.7.10.1 2.7.11.1] | (RefSeq) SERK3A; somatic embryogenesis receptor kinase 3A precursor (A)	ko04016: MAPK signaling pathway - plant; ko04075: Plant hormone signal transduction; ko04626: Plant-pathogen interaction
Solyc05g008310.3	3.35	2.21333	-0.59794	K13416 brassinosteroid insensitive 1-associated receptor kinase 1 [EC:2.7.10.1 2.7.11.1] | (RefSeq) SERK3A; somatic embryogenesis receptor kinase 3A precursor (A)	ko04016: MAPK signaling pathway - plant; ko04075: Plant hormone signal transduction; ko04626: Plant-pathogen interaction
Solyc05g018910.2	0	0.116667	#DIV/0!	K13416 brassinosteroid insensitive 1-associated receptor kinase 1 [EC:2.7.10.1 2.7.11.1] | (RefSeq) SERK3A; somatic embryogenesis receptor kinase 3A precursor (A)	ko04016: MAPK signaling pathway - plant; ko04075: Plant hormone signal transduction; ko04626: Plant-pathogen interaction
Solyc05g053010.1	30.7133	30.38	-0.0157432	K13416 brassinosteroid insensitive 1-associated receptor kinase 1 [EC:2.7.10.1 2.7.11.1] | (RefSeq) SERK3A; somatic embryogenesis receptor kinase 3A precursor (A)	ko04016: MAPK signaling pathway - plant; ko04075: Plant hormone signal transduction; ko04626: Plant-pathogen interaction
Solyc06g048560.1	0	0.06	#DIV/0!	K13416 brassinosteroid insensitive 1-associated receptor kinase 1 [EC:2.7.10.1 2.7.11.1] | (RefSeq) SERK3A; somatic embryogenesis receptor kinase 3A precursor (A)	ko04016: MAPK signaling pathway - plant; ko04075: Plant hormone signal transduction; ko04626: Plant-pathogen interaction
Solyc06g048620.3	1.14333	1.49333	0.38529	K13416 brassinosteroid insensitive 1-associated receptor kinase 1 [EC:2.7.10.1 2.7.11.1] | (RefSeq) SERK3A; somatic embryogenesis receptor kinase 3A precursor (A)	ko04016: MAPK signaling pathway - plant; ko04075: Plant hormone signal transduction; ko04626: Plant-pathogen interaction
Solyc06g048950.3	5.09667	6	0.235408	K13416 brassinosteroid insensitive 1-associated receptor kinase 1 [EC:2.7.10.1 2.7.11.1] | (RefSeq) SERK3A; somatic embryogenesis receptor kinase 3A precursor (A)	ko04016: MAPK signaling pathway - plant; ko04075: Plant hormone signal transduction; ko04626: Plant-pathogen interaction
Solyc06g082610.3	9.69333	9.90333	0.0309213	K13416 brassinosteroid insensitive 1-associated receptor kinase 1 [EC:2.7.10.1 2.7.11.1] | (RefSeq) SERK3A; somatic embryogenesis receptor kinase 3A precursor (A)	ko04016: MAPK signaling pathway - plant; ko04075: Plant hormone signal transduction; ko04626: Plant-pathogen interaction
Solyc07g053130.3	18.9533	20.2767	0.0973689	K13416 brassinosteroid insensitive 1-associated receptor kinase 1 [EC:2.7.10.1 2.7.11.1] | (RefSeq) SERK3A; somatic embryogenesis receptor kinase 3A precursor (A)	ko04016: MAPK signaling pathway - plant; ko04075: Plant hormone signal transduction; ko04626: Plant-pathogen interaction
Solyc07g053220.2	22.3633	22.1067	-0.0166537	K13416 brassinosteroid insensitive 1-associated receptor kinase 1 [EC:2.7.10.1 2.7.11.1] | (RefSeq) SERK3A; somatic embryogenesis receptor kinase 3A precursor (A)	ko04016: MAPK signaling pathway - plant; ko04075: Plant hormone signal transduction; ko04626: Plant-pathogen interaction
Solyc07g055570.1	0.433333	0.486667	0.167457	K13416 brassinosteroid insensitive 1-associated receptor kinase 1 [EC:2.7.10.1 2.7.11.1] | (RefSeq) SERK3A; somatic embryogenesis receptor kinase 3A precursor (A)	ko04016: MAPK signaling pathway - plant; ko04075: Plant hormone signal transduction; ko04626: Plant-pathogen interaction
Solyc07g055630.3	24.7133	23.8333	-0.0523089	K13416 brassinosteroid insensitive 1-associated receptor kinase 1 [EC:2.7.10.1 2.7.11.1] | (RefSeq) SERK3A; somatic embryogenesis receptor kinase 3A precursor (A)	ko04016: MAPK signaling pathway - plant; ko04075: Plant hormone signal transduction; ko04626: Plant-pathogen interaction
Solyc07g055810.3	28.4167	43.6633	0.619685	K13416 brassinosteroid insensitive 1-associated receptor kinase 1 [EC:2.7.10.1 2.7.11.1] | (RefSeq) SERK3A; somatic embryogenesis receptor kinase 3A precursor (A)	ko04016: MAPK signaling pathway - plant; ko04075: Plant hormone signal transduction; ko04626: Plant-pathogen interaction
Solyc07g056270.3	12.84	17.3533	0.434568	K13416 brassinosteroid insensitive 1-associated receptor kinase 1 [EC:2.7.10.1 2.7.11.1] | (RefSeq) SERK3A; somatic embryogenesis receptor kinase 3A precursor (A)	ko04016: MAPK signaling pathway - plant; ko04075: Plant hormone signal transduction; ko04626: Plant-pathogen interaction
Solyc07g066550.3	0.283333	0.27	-0.0695409	K13416 brassinosteroid insensitive 1-associated receptor kinase 1 [EC:2.7.10.1 2.7.11.1] | (RefSeq) SERK3A; somatic embryogenesis receptor kinase 3A precursor (A)	ko04016: MAPK signaling pathway - plant; ko04075: Plant hormone signal transduction; ko04626: Plant-pathogen interaction
Solyc08g079460.3	5.65333	6.06	0.100216	K13416 brassinosteroid insensitive 1-associated receptor kinase 1 [EC:2.7.10.1 2.7.11.1] | (RefSeq) SERK3A; somatic embryogenesis receptor kinase 3A precursor (A)	ko04016: MAPK signaling pathway - plant; ko04075: Plant hormone signal transduction; ko04626: Plant-pathogen interaction
Solyc08g081940.3	5.04	5.81	0.205114	K13416 brassinosteroid insensitive 1-associated receptor kinase 1 [EC:2.7.10.1 2.7.11.1] | (RefSeq) SERK3A; somatic embryogenesis receptor kinase 3A precursor (A)	ko04016: MAPK signaling pathway - plant; ko04075: Plant hormone signal transduction; ko04626: Plant-pathogen interaction
Solyc09g007510.2	2.24	1.81333	-0.304855	K13416 brassinosteroid insensitive 1-associated receptor kinase 1 [EC:2.7.10.1 2.7.11.1] | (RefSeq) SERK3A; somatic embryogenesis receptor kinase 3A precursor (A)	ko04016: MAPK signaling pathway - plant; ko04075: Plant hormone signal transduction; ko04626: Plant-pathogen interaction
Solyc09g015520.3	1.89333	2.00667	0.0838726	K13416 brassinosteroid insensitive 1-associated receptor kinase 1 [EC:2.7.10.1 2.7.11.1] | (RefSeq) SERK3A; somatic embryogenesis receptor kinase 3A precursor (A)	ko04016: MAPK signaling pathway - plant; ko04075: Plant hormone signal transduction; ko04626: Plant-pathogen interaction
Solyc09g030450.3	1.37	2.61667	0.933554	K13416 brassinosteroid insensitive 1-associated receptor kinase 1 [EC:2.7.10.1 2.7.11.1] | (RefSeq) SERK3A; somatic embryogenesis receptor kinase 3A precursor (A)	ko04016: MAPK signaling pathway - plant; ko04075: Plant hormone signal transduction; ko04626: Plant-pathogen interaction
Solyc09g075910.1	15.5367	10.9033	-0.510908	K13416 brassinosteroid insensitive 1-associated receptor kinase 1 [EC:2.7.10.1 2.7.11.1] | (RefSeq) SERK3A; somatic embryogenesis receptor kinase 3A precursor (A)	ko04016: MAPK signaling pathway - plant; ko04075: Plant hormone signal transduction; ko04626: Plant-pathogen interaction
Solyc09g091990.3	13.6333	13.3	-0.0357121	K13416 brassinosteroid insensitive 1-associated receptor kinase 1 [EC:2.7.10.1 2.7.11.1] | (RefSeq) SERK3A; somatic embryogenesis receptor kinase 3A precursor (A)	ko04016: MAPK signaling pathway - plant; ko04075: Plant hormone signal transduction; ko04626: Plant-pathogen interaction
Solyc10g005640.3	16.56	13.98	-0.244338	K13416 brassinosteroid insensitive 1-associated receptor kinase 1 [EC:2.7.10.1 2.7.11.1] | (RefSeq) SERK3A; somatic embryogenesis receptor kinase 3A precursor (A)	ko04016: MAPK signaling pathway - plant; ko04075: Plant hormone signal transduction; ko04626: Plant-pathogen interaction
Solyc10g006690.3	6.79333	8.31	0.290729	K13416 brassinosteroid insensitive 1-associated receptor kinase 1 [EC:2.7.10.1 2.7.11.1] | (RefSeq) SERK3A; somatic embryogenesis receptor kinase 3A precursor (A)	ko04016: MAPK signaling pathway - plant; ko04075: Plant hormone signal transduction; ko04626: Plant-pathogen interaction
Solyc10g006710.3	2.27333	1.82	-0.320871	K13416 brassinosteroid insensitive 1-associated receptor kinase 1 [EC:2.7.10.1 2.7.11.1] | (RefSeq) SERK3A; somatic embryogenesis receptor kinase 3A precursor (A)	ko04016: MAPK signaling pathway - plant; ko04075: Plant hormone signal transduction; ko04626: Plant-pathogen interaction
Solyc10g047140.2	14.6967	12.22	-0.266245	K13416 brassinosteroid insensitive 1-associated receptor kinase 1 [EC:2.7.10.1 2.7.11.1] | (RefSeq) SERK3A; somatic embryogenesis receptor kinase 3A precursor (A)	ko04016: MAPK signaling pathway - plant; ko04075: Plant hormone signal transduction; ko04626: Plant-pathogen interaction
Solyc10g076760.2	0.966667	0.97	0.00496625	K13416 brassinosteroid insensitive 1-associated receptor kinase 1 [EC:2.7.10.1 2.7.11.1] | (RefSeq) SERK3A; somatic embryogenesis receptor kinase 3A precursor (A)	ko04016: MAPK signaling pathway - plant; ko04075: Plant hormone signal transduction; ko04626: Plant-pathogen interaction
Solyc10g084250.1	4.03	4.75667	0.239171	K13416 brassinosteroid insensitive 1-associated receptor kinase 1 [EC:2.7.10.1 2.7.11.1] | (RefSeq) SERK3A; somatic embryogenesis receptor kinase 3A precursor (A)	ko04016: MAPK signaling pathway - plant; ko04075: Plant hormone signal transduction; ko04626: Plant-pathogen interaction
Solyc10g084860.1	2.48	2.71333	0.129726	K13416 brassinosteroid insensitive 1-associated receptor kinase 1 [EC:2.7.10.1 2.7.11.1] | (RefSeq) SERK3A; somatic embryogenesis receptor kinase 3A precursor (A)	ko04016: MAPK signaling pathway - plant; ko04075: Plant hormone signal transduction; ko04626: Plant-pathogen interaction
Solyc11g013083.1	0.253333	0.266667	0.0740006	K13416 brassinosteroid insensitive 1-associated receptor kinase 1 [EC:2.7.10.1 2.7.11.1] | (RefSeq) SERK3A; somatic embryogenesis receptor kinase 3A precursor (A)	ko04016: MAPK signaling pathway - plant; ko04075: Plant hormone signal transduction; ko04626: Plant-pathogen interaction
Solyc12g014350.2	1.91667	2.32333	0.277597	K13416 brassinosteroid insensitive 1-associated receptor kinase 1 [EC:2.7.10.1 2.7.11.1] | (RefSeq) SERK3A; somatic embryogenesis receptor kinase 3A precursor (A)	ko04016: MAPK signaling pathway - plant; ko04075: Plant hormone signal transduction; ko04626: Plant-pathogen interaction
novel.2431	0.616667	0.616667	3.20343e-16	K13416 brassinosteroid insensitive 1-associated receptor kinase 1 [EC:2.7.10.1 2.7.11.1] | (RefSeq) SERK3A; somatic embryogenesis receptor kinase 3A precursor (A)	ko04016: MAPK signaling pathway - plant; ko04075: Plant hormone signal transduction; ko04626: Plant-pathogen interaction
Solyc01g009810.3	13.5033	9.33	-0.533367	K13416 brassinosteroid insensitive 1-associated receptor kinase 1 [EC:2.7.10.1 2.7.11.1] | (RefSeq) SERK3B; somatic embryogenesis receptor kinase 3B precursor (A)	ko04016: MAPK signaling pathway - plant; ko04075: Plant hormone signal transduction; ko04626: Plant-pathogen interaction
Solyc01g104970.3	7.68667	6.03	-0.3502	K13416 brassinosteroid insensitive 1-associated receptor kinase 1 [EC:2.7.10.1 2.7.11.1] | (RefSeq) SERK3B; somatic embryogenesis receptor kinase 3B precursor (A)	ko04016: MAPK signaling pathway - plant; ko04075: Plant hormone signal transduction; ko04626: Plant-pathogen interaction
Solyc01g104980.3	0.45	0.526667	0.226965	K13416 brassinosteroid insensitive 1-associated receptor kinase 1 [EC:2.7.10.1 2.7.11.1] | (RefSeq) SERK3B; somatic embryogenesis receptor kinase 3B precursor (A)	ko04016: MAPK signaling pathway - plant; ko04075: Plant hormone signal transduction; ko04626: Plant-pathogen interaction
Solyc01g111950.3	0.0333333	0.0766667	1.20163	K13416 brassinosteroid insensitive 1-associated receptor kinase 1 [EC:2.7.10.1 2.7.11.1] | (RefSeq) SERK3B; somatic embryogenesis receptor kinase 3B precursor (A)	ko04016: MAPK signaling pathway - plant; ko04075: Plant hormone signal transduction; ko04626: Plant-pathogen interaction
Solyc02g072070.3	0.0266667	0.0333333	0.321928	K13416 brassinosteroid insensitive 1-associated receptor kinase 1 [EC:2.7.10.1 2.7.11.1] | (RefSeq) SERK3B; somatic embryogenesis receptor kinase 3B precursor (A)	ko04016: MAPK signaling pathway - plant; ko04075: Plant hormone signal transduction; ko04626: Plant-pathogen interaction
Solyc03g031980.3	4.93	3.33333	-0.564622	K13416 brassinosteroid insensitive 1-associated receptor kinase 1 [EC:2.7.10.1 2.7.11.1] | (RefSeq) SERK3B; somatic embryogenesis receptor kinase 3B precursor (A)	ko04016: MAPK signaling pathway - plant; ko04075: Plant hormone signal transduction; ko04626: Plant-pathogen interaction
Solyc03g112730.3	0.15	0.05	-1.58496	K13416 brassinosteroid insensitive 1-associated receptor kinase 1 [EC:2.7.10.1 2.7.11.1] | (RefSeq) SERK3B; somatic embryogenesis receptor kinase 3B precursor (A)	ko04016: MAPK signaling pathway - plant; ko04075: Plant hormone signal transduction; ko04626: Plant-pathogen interaction
Solyc04g008370.2	2.57333	3.00667	0.224527	K13416 brassinosteroid insensitive 1-associated receptor kinase 1 [EC:2.7.10.1 2.7.11.1] | (RefSeq) SERK3B; somatic embryogenesis receptor kinase 3B precursor (A)	ko04016: MAPK signaling pathway - plant; ko04075: Plant hormone signal transduction; ko04626: Plant-pathogen interaction
Solyc04g077357.1	0.1	0.476667	2.25298	K13416 brassinosteroid insensitive 1-associated receptor kinase 1 [EC:2.7.10.1 2.7.11.1] | (RefSeq) SERK3B; somatic embryogenesis receptor kinase 3B precursor (A)	ko04016: MAPK signaling pathway - plant; ko04075: Plant hormone signal transduction; ko04626: Plant-pathogen interaction
Solyc05g009050.3	11.88	12.8567	0.113982	K13416 brassinosteroid insensitive 1-associated receptor kinase 1 [EC:2.7.10.1 2.7.11.1] | (RefSeq) SERK3B; somatic embryogenesis receptor kinase 3B precursor (A)	ko04016: MAPK signaling pathway - plant; ko04075: Plant hormone signal transduction; ko04626: Plant-pathogen interaction
Solyc05g009090.2	6.23333	7.06	0.179664	K13416 brassinosteroid insensitive 1-associated receptor kinase 1 [EC:2.7.10.1 2.7.11.1] | (RefSeq) SERK3B; somatic embryogenesis receptor kinase 3B precursor (A)	ko04016: MAPK signaling pathway - plant; ko04075: Plant hormone signal transduction; ko04626: Plant-pathogen interaction
Solyc06g068910.3	0.616667	0.483333	-0.351472	K13416 brassinosteroid insensitive 1-associated receptor kinase 1 [EC:2.7.10.1 2.7.11.1] | (RefSeq) SERK3B; somatic embryogenesis receptor kinase 3B precursor (A)	ko04016: MAPK signaling pathway - plant; ko04075: Plant hormone signal transduction; ko04626: Plant-pathogen interaction
Solyc07g053120.3	7.57667	8.97667	0.244617	K13416 brassinosteroid insensitive 1-associated receptor kinase 1 [EC:2.7.10.1 2.7.11.1] | (RefSeq) SERK3B; somatic embryogenesis receptor kinase 3B precursor (A)	ko04016: MAPK signaling pathway - plant; ko04075: Plant hormone signal transduction; ko04626: Plant-pathogen interaction
Solyc07g065610.1	0.336667	0.493333	0.551242	K13416 brassinosteroid insensitive 1-associated receptor kinase 1 [EC:2.7.10.1 2.7.11.1] | (RefSeq) SERK3B; somatic embryogenesis receptor kinase 3B precursor (A)	ko04016: MAPK signaling pathway - plant; ko04075: Plant hormone signal transduction; ko04626: Plant-pathogen interaction
Solyc09g011330.2	7.39667	8.54	0.207361	K13416 brassinosteroid insensitive 1-associated receptor kinase 1 [EC:2.7.10.1 2.7.11.1] | (RefSeq) SERK3B; somatic embryogenesis receptor kinase 3B precursor (A)	ko04016: MAPK signaling pathway - plant; ko04075: Plant hormone signal transduction; ko04626: Plant-pathogen interaction
Solyc09g075920.1	16.84	13.12	-0.360124	K13416 brassinosteroid insensitive 1-associated receptor kinase 1 [EC:2.7.10.1 2.7.11.1] | (RefSeq) SERK3B; somatic embryogenesis receptor kinase 3B precursor (A)	ko04016: MAPK signaling pathway - plant; ko04075: Plant hormone signal transduction; ko04626: Plant-pathogen interaction
Solyc10g051330.2	0	0.00666667	#DIV/0!	K13416 brassinosteroid insensitive 1-associated receptor kinase 1 [EC:2.7.10.1 2.7.11.1] | (RefSeq) SERK3B; somatic embryogenesis receptor kinase 3B precursor (A)	ko04016: MAPK signaling pathway - plant; ko04075: Plant hormone signal transduction; ko04626: Plant-pathogen interaction
Solyc10g081190.2	493.513	389.91	-0.339948	K13416 brassinosteroid insensitive 1-associated receptor kinase 1 [EC:2.7.10.1 2.7.11.1] | (RefSeq) SERK3B; somatic embryogenesis receptor kinase 3B precursor (A)	ko04016: MAPK signaling pathway - plant; ko04075: Plant hormone signal transduction; ko04626: Plant-pathogen interaction
Solyc11g011873.1	0.02	0	#NUM!	K13416 brassinosteroid insensitive 1-associated receptor kinase 1 [EC:2.7.10.1 2.7.11.1] | (RefSeq) SERK3B; somatic embryogenesis receptor kinase 3B precursor (A)	ko04016: MAPK signaling pathway - plant; ko04075: Plant hormone signal transduction; ko04626: Plant-pathogen interaction
Solyc11g011880.2	0.643333	1.48	1.20196	K13416 brassinosteroid insensitive 1-associated receptor kinase 1 [EC:2.7.10.1 2.7.11.1] | (RefSeq) SERK3B; somatic embryogenesis receptor kinase 3B precursor (A)	ko04016: MAPK signaling pathway - plant; ko04075: Plant hormone signal transduction; ko04626: Plant-pathogen interaction
Solyc00g050430.3	1.17667	1.31	0.154861	K13422 transcription factor MYC2 | (RefSeq) MYC1; transcription factor MYC1 (A)	ko04016: MAPK signaling pathway - plant; ko04075: Plant hormone signal transduction
Solyc01g096370.3	11.3233	10.5233	-0.105707	K13422 transcription factor MYC2 | (RefSeq) MYC1; transcription factor MYC1 (A)	ko04016: MAPK signaling pathway - plant; ko04075: Plant hormone signal transduction
Solyc01g106460.3	0.04	0.0333333	-0.263034	K13422 transcription factor MYC2 | (RefSeq) MYC1; transcription factor MYC1 (A)	ko04016: MAPK signaling pathway - plant; ko04075: Plant hormone signal transduction
Solyc02g063430.3	1.46	2.07333	0.505984	K13422 transcription factor MYC2 | (RefSeq) MYC1; transcription factor MYC1 (A)	ko04016: MAPK signaling pathway - plant; ko04075: Plant hormone signal transduction
Solyc02g091800.3	0.926667	0.25	-1.89012	K13422 transcription factor MYC2 | (RefSeq) MYC1; transcription factor MYC1 (A)	ko04016: MAPK signaling pathway - plant; ko04075: Plant hormone signal transduction
Solyc02g091810.2	0	0.116667	#DIV/0!	K13422 transcription factor MYC2 | (RefSeq) MYC1; transcription factor MYC1 (A)	ko04016: MAPK signaling pathway - plant; ko04075: Plant hormone signal transduction
Solyc02g091820.2	0.23	0.09	-1.35364	K13422 transcription factor MYC2 | (RefSeq) MYC1; transcription factor MYC1 (A)	ko04016: MAPK signaling pathway - plant; ko04075: Plant hormone signal transduction
Solyc03g095980.3	1.67333	3.31	0.984106	K13422 transcription factor MYC2 | (RefSeq) MYC1; transcription factor MYC1 (A)	ko04016: MAPK signaling pathway - plant; ko04075: Plant hormone signal transduction
Solyc03g118310.3	0.09	0.256667	1.5119	K13422 transcription factor MYC2 | (RefSeq) MYC1; transcription factor MYC1 (A)	ko04016: MAPK signaling pathway - plant; ko04075: Plant hormone signal transduction
Solyc05g005300.2	0.526667	0.276667	-0.928741	K13422 transcription factor MYC2 | (RefSeq) MYC1; transcription factor MYC1 (A)	ko04016: MAPK signaling pathway - plant; ko04075: Plant hormone signal transduction
Solyc05g014590.3	0.193333	0.383333	0.987509	K13422 transcription factor MYC2 | (RefSeq) MYC1; transcription factor MYC1 (A)	ko04016: MAPK signaling pathway - plant; ko04075: Plant hormone signal transduction
Solyc06g068870.3	24.0167	21.1467	-0.183606	K13422 transcription factor MYC2 | (RefSeq) MYC1; transcription factor MYC1 (A)	ko04016: MAPK signaling pathway - plant; ko04075: Plant hormone signal transduction
Solyc06g083980.2	12.8	11.5033	-0.154092	K13422 transcription factor MYC2 | (RefSeq) MYC1; transcription factor MYC1 (A)	ko04016: MAPK signaling pathway - plant; ko04075: Plant hormone signal transduction
Solyc07g018010.3	15.1867	18.5667	0.28991	K13422 transcription factor MYC2 | (RefSeq) MYC1; transcription factor MYC1 (A)	ko04016: MAPK signaling pathway - plant; ko04075: Plant hormone signal transduction
Solyc08g005050.3	39.1167	40.28	0.0422802	K13422 transcription factor MYC2 | (RefSeq) MYC1; transcription factor MYC1 (A)	ko04016: MAPK signaling pathway - plant; ko04075: Plant hormone signal transduction
Solyc08g008600.3	0.01	0	#NUM!	K13422 transcription factor MYC2 | (RefSeq) MYC1; transcription factor MYC1 (A)	ko04016: MAPK signaling pathway - plant; ko04075: Plant hormone signal transduction
Solyc08g062780.2	0.0366667	0.0266667	-0.459432	K13422 transcription factor MYC2 | (RefSeq) MYC1; transcription factor MYC1 (A)	ko04016: MAPK signaling pathway - plant; ko04075: Plant hormone signal transduction
Solyc08g081140.3	27.91	17.1267	-0.704538	K13422 transcription factor MYC2 | (RefSeq) MYC1; transcription factor MYC1 (A)	ko04016: MAPK signaling pathway - plant; ko04075: Plant hormone signal transduction
Solyc08g083170.1	0.0966667	0	#NUM!	K13422 transcription factor MYC2 | (RefSeq) MYC1; transcription factor MYC1 (A)	ko04016: MAPK signaling pathway - plant; ko04075: Plant hormone signal transduction
Solyc10g009270.3	2.49667	0.243333	-3.359	K13422 transcription factor MYC2 | (RefSeq) MYC1; transcription factor MYC1 (A)	ko04016: MAPK signaling pathway - plant; ko04075: Plant hormone signal transduction
Solyc10g009290.1	11	9.51667	-0.208975	K13422 transcription factor MYC2 | (RefSeq) MYC1; transcription factor MYC1 (A)	ko04016: MAPK signaling pathway - plant; ko04075: Plant hormone signal transduction
Solyc01g096050.3	20.4433	20.02	-0.0301885	K13422 transcription factor MYC2 | (RefSeq) MYC2; transcription factor MYC2 (A)	ko04016: MAPK signaling pathway - plant; ko04075: Plant hormone signal transduction
Solyc02g091690.3	0.36	0.193333	-0.896907	K13422 transcription factor MYC2 | (RefSeq) MYC2; transcription factor MYC2 (A)	ko04016: MAPK signaling pathway - plant; ko04075: Plant hormone signal transduction
Solyc05g050560.1	11.2933	11.1067	-0.0240455	K13422 transcription factor MYC2 | (RefSeq) MYC2; transcription factor MYC2 (A)	ko04016: MAPK signaling pathway - plant; ko04075: Plant hormone signal transduction
Solyc07g053290.3	8.19667	5.58	-0.554772	K13422 transcription factor MYC2 | (RefSeq) MYC2; transcription factor MYC2 (A)	ko04016: MAPK signaling pathway - plant; ko04075: Plant hormone signal transduction
Solyc08g076930.1	158.933	152.67	-0.0580051	K13422 transcription factor MYC2 | (RefSeq) MYC2; transcription factor MYC2 (A)	ko04016: MAPK signaling pathway - plant; ko04075: Plant hormone signal transduction
Solyc09g065100.2	4.03667	4.03333	-0.00119182	K13422 transcription factor MYC2 | (RefSeq) MYC2; transcription factor MYC2 (A)	ko04016: MAPK signaling pathway - plant; ko04075: Plant hormone signal transduction
Solyc00g174330.3	147.487	86.63	-0.767646	K13449 pathogenesis-related protein 1 | (RefSeq) P4; pathogenesis-related leaf protein 4 precursor (A)	ko04016: MAPK signaling pathway - plant; ko04075: Plant hormone signal transduction; ko04626: Plant-pathogen interaction
Solyc02g065470.1	30.22	29.4133	-0.0390334	K13449 pathogenesis-related protein 1 | (RefSeq) pathogenesis-related leaf protein 6 (A)	ko04016: MAPK signaling pathway - plant; ko04075: Plant hormone signal transduction; ko04626: Plant-pathogen interaction
Solyc07g006710.2	26.42	24.0867	-0.133396	K13449 pathogenesis-related protein 1 | (RefSeq) pathogenesis-related leaf protein 6 (A)	ko04016: MAPK signaling pathway - plant; ko04075: Plant hormone signal transduction; ko04626: Plant-pathogen interaction
Solyc01g106630.2	21.8733	20.97	-0.0608462	K13449 pathogenesis-related protein 1 | (RefSeq) PR1 protein precursor (A)	ko04016: MAPK signaling pathway - plant; ko04075: Plant hormone signal transduction; ko04626: Plant-pathogen interaction
Solyc10g085960.1	1.95667	1.81	-0.112408	K13449 pathogenesis-related protein 1 | (RefSeq) PR1 protein precursor (A)	ko04016: MAPK signaling pathway - plant; ko04075: Plant hormone signal transduction; ko04626: Plant-pathogen interaction
novel.413	0.543333	0	#NUM!	K13449 pathogenesis-related protein 1 | (RefSeq) PR1 protein precursor (A)	ko04016: MAPK signaling pathway - plant; ko04075: Plant hormone signal transduction; ko04626: Plant-pathogen interaction
Solyc09g007020.2	48.62	50.5933	0.0573974	K13449 pathogenesis-related protein 1 | (RefSeq) PR1a2; pathogenesis-related protein precursor (A)	ko04016: MAPK signaling pathway - plant; ko04075: Plant hormone signal transduction; ko04626: Plant-pathogen interaction
Solyc00g174340.2	4997	3250.26	-0.620508	K13449 pathogenesis-related protein 1 | (RefSeq) PR1b1; pathogenesis-related leaf protein 6 precursor (A)	ko04016: MAPK signaling pathway - plant; ko04075: Plant hormone signal transduction; ko04626: Plant-pathogen interaction
Solyc05g052620.3	27.53	31.9967	0.216917	K13463 coronatine-insensitive protein 1 | (RefSeq) Coi1; coronatine-insensitive 1 (A)	ko04075: Plant hormone signal transduction
Solyc01g005440.3	83.4767	56.79	-0.555736	K13464 jasmonate ZIM domain-containing protein | (RefSeq) jasmonate ZIM-domain protein 3 (A)	ko04075: Plant hormone signal transduction
Solyc11g011030.2	77.06	41.6767	-0.886742	K13464 jasmonate ZIM domain-containing protein | (RefSeq) Prg1; Pto-responsive gene 1 protein (A)	ko04075: Plant hormone signal transduction
Solyc07g042170.3	245.833	267.157	0.120005	K13464 jasmonate ZIM domain-containing protein | (RefSeq) protein TIFY 10b-like (A)	ko04075: Plant hormone signal transduction
Solyc12g049400.2	1.26667	1.14	-0.152003	K13464 jasmonate ZIM domain-containing protein | (RefSeq) protein TIFY 10b-like (A)	ko04075: Plant hormone signal transduction
Solyc01g103600.3	0.796667	1.41	0.823647	K13464 jasmonate ZIM domain-containing protein | (RefSeq) protein TIFY 3A-like isoform X2 (A)	ko04075: Plant hormone signal transduction
Solyc03g118540.3	3.21333	2.81667	-0.190082	K13464 jasmonate ZIM domain-containing protein | (RefSeq) protein TIFY 6B isoform X1 (A)	ko04075: Plant hormone signal transduction
Solyc06g068930.2	0.0533333	0.0433333	-0.29956	K13464 jasmonate ZIM domain-containing protein | (RefSeq) protein TIFY 6B isoform X1 (A)	ko04075: Plant hormone signal transduction
Solyc12g009220.2	286.76	225.19	-0.348701	K13464 jasmonate ZIM domain-containing protein | (RefSeq) SlJAZ2; jasmonate ZIM-domain protein 2 (A)	ko04075: Plant hormone signal transduction
Solyc03g122190.3	62.18	62.4167	0.0054807	K13464 jasmonate ZIM domain-containing protein | (RefSeq) SRG1; salt responsive protein 1 (A)	ko04075: Plant hormone signal transduction
Solyc06g084120.3	2.91333	3.21333	0.1414	K13464 jasmonate ZIM domain-containing protein | (RefSeq) SRG1; salt responsive protein 1 (A)	ko04075: Plant hormone signal transduction
Solyc01g111310.3	2.53333	2.82	0.154658	K13946 auxin influx carrier (AUX1 LAX family) | (RefSeq) LAX2 protein (A)	ko04075: Plant hormone signal transduction
Solyc11g013310.2	8.12667	8.60667	0.0827909	K13946 auxin influx carrier (AUX1 LAX family) | (RefSeq) LAX3 protein (A)	ko04075: Plant hormone signal transduction
Solyc10g076790.2	2.98667	2.99	0.00160925	K13946 auxin influx carrier (AUX1 LAX family) | (RefSeq) LAX4 protein (A)	ko04075: Plant hormone signal transduction
Solyc10g055260.2	0.0766667	0.153333	1	K13946 auxin influx carrier (AUX1 LAX family) | (RefSeq) LAX5 protein (A)	ko04075: Plant hormone signal transduction
Solyc09g014380.3	20.4067	23.4733	0.201982	K13946 auxin influx carrier (AUX1 LAX family) | (RefSeq) SlLAX1; protein LAX1 (A)	ko04075: Plant hormone signal transduction
Solyc10g078670.2	0	0.03	#DIV/0!	K14431 transcription factor TGA | (RefSeq) bZIP transcription factor TGA10-like (A)	ko04075: Plant hormone signal transduction
Solyc10g080400.2	1.59333	3.09	0.955559	K14431 transcription factor TGA | (RefSeq) bZIP transcription factor TGA10-like (A)	ko04075: Plant hormone signal transduction
Solyc10g080410.2	0	0.0133333	#DIV/0!	K14431 transcription factor TGA | (RefSeq) bZIP transcription factor TGA10-like (A)	ko04075: Plant hormone signal transduction
Solyc04g054320.3	14.4233	14.91	0.0478756	K14431 transcription factor TGA | (RefSeq) NITF; leucine-zipper transcription factor (A)	ko04075: Plant hormone signal transduction
Solyc04g011670.3	16.6133	14.0867	-0.238011	K14431 transcription factor TGA | (RefSeq) TGACG-sequence-specific DNA-binding protein TGA-1A isoform X1 (A)	ko04075: Plant hormone signal transduction
Solyc04g076970.3	2.44667	1.94667	-0.329812	K14431 transcription factor TGA | (RefSeq) TGACG-sequence-specific DNA-binding protein TGA-2.1 (A)	ko04075: Plant hormone signal transduction
Solyc10g080770.2	10.15	10.1	-0.00712443	K14431 transcription factor TGA | (RefSeq) TGACG-sequence-specific DNA-binding protein TGA-2.1 (A)	ko04075: Plant hormone signal transduction
Solyc10g080780.2	8.86	8.75667	-0.0169249	K14431 transcription factor TGA | (RefSeq) TGACG-sequence-specific DNA-binding protein TGA-2.1 (A)	ko04075: Plant hormone signal transduction
Solyc10g085210.2	0.02	0.0433333	1.11548	K14431 transcription factor TGA | (RefSeq) TGACG-sequence-specific DNA-binding protein TGA-2.1 (A)	ko04075: Plant hormone signal transduction
novel.1021	141.24	125.263	-0.173185	K14431 transcription factor TGA | (RefSeq) TGACG-sequence-specific DNA-binding protein TGA-2.1 (A)	ko04075: Plant hormone signal transduction
Solyc09g005610.3	9.01	3.97667	-1.17997	K14431 transcription factor TGA | (RefSeq) transcription factor TGA1 (A)	ko04075: Plant hormone signal transduction
Solyc12g056850.2	21.4767	21.3767	-0.00673319	K14431 transcription factor TGA | (RefSeq) transcription factor TGA1 (A)	ko04075: Plant hormone signal transduction
Solyc04g072460.3	10.1167	8.97	-0.173554	K14431 transcription factor TGA | (RefSeq) transcription factor TGA1 isoform X2 (A)	ko04075: Plant hormone signal transduction
Solyc11g064950.2	21.9867	25.2767	0.201177	K14431 transcription factor TGA | (RefSeq) transcription factor TGA2.2 (A)	ko04075: Plant hormone signal transduction
Solyc11g064953.1	9.23	8.2	-0.170707	K14431 transcription factor TGA | (RefSeq) transcription factor TGA2.2 (A)	ko04075: Plant hormone signal transduction
Solyc01g008730.3	6.39667	8.42667	0.397642	K14431 transcription factor TGA | (RefSeq) transcription factor TGA2.2-like (A)	ko04075: Plant hormone signal transduction
Solyc05g009650.3	0.236667	0.31	0.389412	K14431 transcription factor TGA | (RefSeq) transcription factor TGA2.3-like (A)	ko04075: Plant hormone signal transduction
Solyc05g009660.3	2.19	2.20667	0.0109378	K14431 transcription factor TGA | (RefSeq) transcription factor TGA2.3-like (A)	ko04075: Plant hormone signal transduction
Solyc06g074320.3	0.156667	0.226667	0.532874	K14431 transcription factor TGA | (RefSeq) transcription factor TGA9 isoform X1 (A)	ko04075: Plant hormone signal transduction
Solyc02g083520.2	1.42667	1.47333	0.0464356	K14432 ABA responsive element binding factor | (RefSeq) ABSCISIC ACID-INSENSITIVE 5-like protein 2 (A)	ko04075: Plant hormone signal transduction
Solyc10g076920.2	0.836667	1.09	0.381603	K14432 ABA responsive element binding factor | (RefSeq) ABSCISIC ACID-INSENSITIVE 5-like protein 2 (A)	ko04075: Plant hormone signal transduction
Solyc10g081350.2	4.54667	5.83333	0.359511	K14432 ABA responsive element binding factor | (RefSeq) ABSCISIC ACID-INSENSITIVE 5-like protein 2 (A)	ko04075: Plant hormone signal transduction
Solyc01g108087.1	26.87	22.27	-0.270895	K14432 ABA responsive element binding factor | (RefSeq) ABSCISIC ACID-INSENSITIVE 5-like protein 7 (A)	ko04075: Plant hormone signal transduction
Solyc04g078840.3	0.59	0.643333	0.124851	K14432 ABA responsive element binding factor | (RefSeq) AREB; AREB-like protein (A)	ko04075: Plant hormone signal transduction
Solyc01g104650.3	4.54333	3.76667	-0.270463	K14432 ABA responsive element binding factor | (RefSeq) bZIP transcription factor 12 isoform X1 (A)	ko04075: Plant hormone signal transduction
Solyc04g071510.3	3.13	3.26667	0.0616566	K14432 ABA responsive element binding factor | (RefSeq) G-box-binding factor 4 isoform X1 (A)	ko04075: Plant hormone signal transduction
Solyc01g008973.1	1.25667	1.05333	-0.25464	K14432 ABA responsive element binding factor | (RefSeq) LOW QUALITY PROTEIN: ABSCISIC ACID-INSENSITIVE 5-like protein 2 (A)	ko04075: Plant hormone signal transduction
Solyc01g008977.1	3.18333	4.01667	0.335461	K14432 ABA responsive element binding factor | (RefSeq) LOW QUALITY PROTEIN: ABSCISIC ACID-INSENSITIVE 5-like protein 2 (A)	ko04075: Plant hormone signal transduction
Solyc01g097330.3	17.9633	12.77	-0.492297	K14432 ABA responsive element binding factor | (RefSeq) protein ABSCISIC ACID-INSENSITIVE 5 isoform X1 (A)	ko04075: Plant hormone signal transduction
Solyc02g089420.1	0.14	0.306667	1.13124	K14432 ABA responsive element binding factor | (RefSeq) protein ABSCISIC ACID-INSENSITIVE 5 isoform X1 (A)	ko04075: Plant hormone signal transduction
Solyc03g046440.2	0.25	0.273333	0.128733	K14432 ABA responsive element binding factor | (RefSeq) protein ABSCISIC ACID-INSENSITIVE 5 isoform X1 (A)	ko04075: Plant hormone signal transduction
Solyc09g009490.3	0.256667	0.556667	1.11692	K14432 ABA responsive element binding factor | (RefSeq) protein ABSCISIC ACID-INSENSITIVE 5 isoform X1 (A)	ko04075: Plant hormone signal transduction
Solyc11g044560.2	22.5533	20.4067	-0.1443	K14432 ABA responsive element binding factor | (RefSeq) SlABF4; ABA responsive transcription factor (A)	ko04075: Plant hormone signal transduction
Solyc09g083280.3	47.4033	35.4533	-0.419067	K14484 auxin-responsive protein IAA | (RefSeq) IAA1 (A)	ko04075: Plant hormone signal transduction
Solyc06g008590.3	2.05667	3.05	0.568501	K14484 auxin-responsive protein IAA | (RefSeq) IAA10; IAA10 protein (A)	ko04075: Plant hormone signal transduction
Solyc09g064530.3	3.08667	3.33333	0.110916	K14484 auxin-responsive protein IAA | (RefSeq) IAA12 (A)	ko04075: Plant hormone signal transduction
Solyc09g090910.2	3.23	3.13667	-0.0423019	K14484 auxin-responsive protein IAA | (RefSeq) IAA13 (A)	ko04075: Plant hormone signal transduction
Solyc09g083290.3	74.16	97.2	0.390315	K14484 auxin-responsive protein IAA | (RefSeq) IAA14 (A)	ko04075: Plant hormone signal transduction
Solyc03g120380.3	1.18	2.01667	0.773186	K14484 auxin-responsive protein IAA | (RefSeq) IAA19 (A)	ko04075: Plant hormone signal transduction
Solyc06g084080.3	0.403333	0.386667	-0.0608822	K14484 auxin-responsive protein IAA | (RefSeq) IAA2 (A)	ko04075: Plant hormone signal transduction
Solyc03g005350.3	4.69667	4.6	-0.0300033	K14484 auxin-responsive protein IAA | (RefSeq) IAA21; AUX/IAA 2 (A)	ko04075: Plant hormone signal transduction
Solyc03g005355.1	0.356667	0.603333	0.758379	K14484 auxin-responsive protein IAA | (RefSeq) IAA21; AUX/IAA 2 (A)	ko04075: Plant hormone signal transduction
Solyc06g008580.3	0.296667	1.39	2.22817	K14484 auxin-responsive protein IAA | (RefSeq) IAA22 (A)	ko04075: Plant hormone signal transduction
Solyc03g121060.3	0.0833333	0.103333	0.31034	K14484 auxin-responsive protein IAA | (RefSeq) IAA26 (A)	ko04075: Plant hormone signal transduction
Solyc08g021820.3	0.553333	0.58	0.0679041	K14484 auxin-responsive protein IAA | (RefSeq) IAA29 (A)	ko04075: Plant hormone signal transduction
Solyc09g065840.3	0.446667	1.01	1.17708	K14484 auxin-responsive protein IAA | (RefSeq) IAA3; IAA3 protein (A)	ko04075: Plant hormone signal transduction
Solyc09g065850.3	0.19	0.113333	-0.745427	K14484 auxin-responsive protein IAA | (RefSeq) IAA3; IAA3 protein (A)	ko04075: Plant hormone signal transduction
Solyc07g008020.3	25.66	32.31	0.33246	K14484 auxin-responsive protein IAA | (RefSeq) IAA35 (A)	ko04075: Plant hormone signal transduction
Solyc06g066020.3	1.80333	0.55	-1.71316	K14484 auxin-responsive protein IAA | (RefSeq) IAA36 (A)	ko04075: Plant hormone signal transduction
Solyc06g053840.3	20.0867	21.1867	0.0769185	K14484 auxin-responsive protein IAA | (RefSeq) IAA4; auxin-responsive protein IAA4 (A)	ko04075: Plant hormone signal transduction
Solyc12g096980.2	0.26	0.186667	-0.478047	K14484 auxin-responsive protein IAA | (RefSeq) IAA5; auxin-regulated IAA5 (A)	ko04075: Plant hormone signal transduction
Solyc06g053830.3	24.2367	17.2067	-0.494224	K14484 auxin-responsive protein IAA | (RefSeq) IAA7; IAA7 protein (A)	ko04075: Plant hormone signal transduction
Solyc03g120410.2	7.86667	6.20333	-0.342709	K14484 auxin-responsive protein IAA | (RefSeq) IAA8; protein IAA8 (A)	ko04075: Plant hormone signal transduction
Solyc01g097290.3	112.307	119.443	0.0888828	K14484 auxin-responsive protein IAA | (RefSeq) SlIAA16; auxin responsive protein IAA16 (A)	ko04075: Plant hormone signal transduction
Solyc03g120500.3	3.71667	3.43333	-0.114399	K14484 auxin-responsive protein IAA | (RefSeq) SlIAA27; auxin-regulated IAA27 (A)	ko04075: Plant hormone signal transduction
Solyc12g007230.2	9.35667	11.46	0.29254	K14484 auxin-responsive protein IAA | (RefSeq) SlIAA8; auxin-regulated IAA8 (A)	ko04075: Plant hormone signal transduction
Solyc04g076850.3	102.573	99.19	-0.0483891	K14484 auxin-responsive protein IAA | (RefSeq) SlIAA9; auxin-responsive protein IAA9 (A)	ko04075: Plant hormone signal transduction
Solyc02g079190.3	27.3067	29.3367	0.103452	K14485 transport inhibitor response 1 | (RefSeq) protein AUXIN SIGNALING F-BOX 2 (A)	ko04075: Plant hormone signal transduction
Solyc04g074980.3	12.11	12.8367	0.0840718	K14485 transport inhibitor response 1 | (RefSeq) TIR1-like protein (A)	ko04075: Plant hormone signal transduction
Solyc05g009250.2	1.63667	2.21333	0.43546	K14485 transport inhibitor response 1 | (RefSeq) TIR1-like protein (A)	ko04075: Plant hormone signal transduction
Solyc06g007850.3	1.95333	2.13667	0.129424	K14485 transport inhibitor response 1 | (RefSeq) TIR1-like protein (A)	ko04075: Plant hormone signal transduction
Solyc06g008780.2	0	0.0433333	#DIV/0!	K14485 transport inhibitor response 1 | (RefSeq) TIR1-like protein (A)	ko04075: Plant hormone signal transduction
Solyc06g008803.1	4.13333	5	0.274622	K14485 transport inhibitor response 1 | (RefSeq) TIR1-like protein (A)	ko04075: Plant hormone signal transduction
Solyc06g008805.1	6.77667	5.93333	-0.191733	K14485 transport inhibitor response 1 | (RefSeq) TIR1-like protein (A)	ko04075: Plant hormone signal transduction
Solyc06g008807.1	4.81	3.84333	-0.323679	K14485 transport inhibitor response 1 | (RefSeq) TIR1-like protein (A)	ko04075: Plant hormone signal transduction
Solyc06g084483.1	4.61667	3.57	-0.370927	K14485 transport inhibitor response 1 | (RefSeq) TIR1-like protein (A)	ko04075: Plant hormone signal transduction
Solyc09g074520.3	31.3733	34.46	0.135384	K14485 transport inhibitor response 1 | (RefSeq) TIR1-like protein (A)	ko04075: Plant hormone signal transduction
Solyc05g056040.3	22.65	20.9433	-0.11302	K14486 auxin response factor | (RefSeq) ARF12; auxin response factor 12 (A)	ko04075: Plant hormone signal transduction
Solyc08g008380.3	5.23667	4.60667	-0.184926	K14486 auxin response factor | (RefSeq) ARF12; auxin response factor 12 (A)	ko04075: Plant hormone signal transduction
Solyc02g077560.3	15.2	12.3533	-0.299171	K14486 auxin response factor | (RefSeq) ARF3; auxin response factor 3 (A)	ko04075: Plant hormone signal transduction
Solyc02g037530.3	5.02333	5.61667	0.161069	K14486 auxin response factor | (RefSeq) ARF5; auxin response factor 5 (A)	ko04075: Plant hormone signal transduction
Solyc04g081235.1	2.27333	1.48333	-0.615966	K14486 auxin response factor | (RefSeq) ARF5; auxin response factor 5 (A)	ko04075: Plant hormone signal transduction
Solyc07g043620.3	4.9	4.9	3.20343e-16	K14486 auxin response factor | (RefSeq) ARF5; auxin response factor 5 (A)	ko04075: Plant hormone signal transduction
Solyc09g007810.3	5.85	5.90333	0.0130932	K14486 auxin response factor | (RefSeq) ARF5; auxin response factor 5 (A)	ko04075: Plant hormone signal transduction
Solyc11g013480.2	1.92333	1.51667	-0.342705	K14486 auxin response factor | (RefSeq) ARF5; auxin response factor 5 (A)	ko04075: Plant hormone signal transduction
Solyc08g082630.3	0.466667	0.393333	-0.24664	K14486 auxin response factor | (RefSeq) ARF9; auxin response factor 9 (A)	ko04075: Plant hormone signal transduction
Solyc01g103050.3	62.99	60.1567	-0.0663982	K14486 auxin response factor | (RefSeq) auxin response factor 1 (A)	ko04075: Plant hormone signal transduction
Solyc03g118290.3	66.4233	60.1867	-0.142246	K14486 auxin response factor | (RefSeq) auxin response factor 1 (A)	ko04075: Plant hormone signal transduction
Solyc11g069190.2	28.32	29.2667	0.0474372	K14486 auxin response factor | (RefSeq) auxin response factor 1 (A)	ko04075: Plant hormone signal transduction
Solyc11g069500.2	4.43	4.85333	0.131669	K14486 auxin response factor | (RefSeq) auxin response factor 1 (A)	ko04075: Plant hormone signal transduction
Solyc12g042075.1	18.8733	11.5867	-0.703884	K14486 auxin response factor | (RefSeq) auxin response factor 1 (A)	ko04075: Plant hormone signal transduction
Solyc12g042077.1	11.12	6.77667	-0.714509	K14486 auxin response factor | (RefSeq) auxin response factor 1 (A)	ko04075: Plant hormone signal transduction
Solyc01g096070.3	19.2767	22.0733	0.195449	K14486 auxin response factor | (RefSeq) auxin response factor 18 (A)	ko04075: Plant hormone signal transduction
Solyc00g188857.1	24.3867	21.82	-0.160441	K14486 auxin response factor | (RefSeq) auxin response factor 7 isoform X1 (A)	ko04075: Plant hormone signal transduction
Solyc03g031970.3	10.8633	10.1367	-0.0998835	K14486 auxin response factor | (RefSeq) auxin response factor 7 isoform X1 (A)	ko04075: Plant hormone signal transduction
Solyc05g047460.3	6.26	6.58333	0.0726556	K14486 auxin response factor | (RefSeq) auxin response factor 7 isoform X1 (A)	ko04075: Plant hormone signal transduction
Solyc06g075150.3	0.543333	0.883333	0.70112	K14486 auxin response factor | (RefSeq) auxin response factor 7 isoform X1 (A)	ko04075: Plant hormone signal transduction
Solyc07g016180.3	0.54	0.48	-0.169925	K14486 auxin response factor | (RefSeq) auxin response factor 7 isoform X1 (A)	ko04075: Plant hormone signal transduction
Solyc07g042260.3	3.26667	5.38667	0.721574	K14486 auxin response factor | (RefSeq) auxin response factor 7 isoform X1 (A)	ko04075: Plant hormone signal transduction
Solyc12g006340.2	4.68667	3.93	-0.254033	K14486 auxin response factor | (RefSeq) auxin response factor 7 isoform X1 (A)	ko04075: Plant hormone signal transduction
Solyc12g006350.2	2.39	2.05333	-0.219043	K14486 auxin response factor | (RefSeq) auxin response factor 7 isoform X1 (A)	ko04075: Plant hormone signal transduction
Solyc10g008520.3	49.9233	54.9	0.137092	K14487 auxin responsive GH3 gene family | (RefSeq) indole-3-acetic acid-amido synthetase GH3.10 (A)	ko04075: Plant hormone signal transduction
Solyc07g054580.3	1.36	2.75	1.01582	K14487 auxin responsive GH3 gene family | (RefSeq) indole-3-acetic acid-amido synthetase GH3.10-like (A)	ko04075: Plant hormone signal transduction
Solyc08g068490.3	5.32333	6.32667	0.249116	K14487 auxin responsive GH3 gene family | (RefSeq) indole-3-acetic acid-amido synthetase GH3.10-like (A)	ko04075: Plant hormone signal transduction
Solyc07g053030.3	0.203333	0.176667	-0.202817	K14487 auxin responsive GH3 gene family | (RefSeq) indole-3-acetic acid-amido synthetase GH3.6 (A)	ko04075: Plant hormone signal transduction
Solyc07g063850.3	0.76	0.433333	-0.810522	K14487 auxin responsive GH3 gene family | (RefSeq) indole-3-acetic acid-amido synthetase GH3.6 (A)	ko04075: Plant hormone signal transduction
Solyc10g006630.2	0	0.0966667	#DIV/0!	K14487 auxin responsive GH3 gene family | (RefSeq) indole-3-acetic acid-amido synthetase GH3.6 (A)	ko04075: Plant hormone signal transduction
Solyc10g079900.2	0.0133333	0.0233333	0.807355	K14487 auxin responsive GH3 gene family | (RefSeq) indole-3-acetic acid-amido synthetase GH3.6 (A)	ko04075: Plant hormone signal transduction
Solyc12g005310.2	0.0433333	0.126667	1.54749	K14487 auxin responsive GH3 gene family | (RefSeq) indole-3-acetic acid-amido synthetase GH3.6 (A)	ko04075: Plant hormone signal transduction
Solyc10g006600.3	0.703333	0.47	-0.581548	K14487 auxin responsive GH3 gene family | (RefSeq) indole-3-acetic acid-amido synthetase GH3.6-like (A)	ko04075: Plant hormone signal transduction
Solyc10g006610.3	0.04	0.136667	1.77259	K14487 auxin responsive GH3 gene family | (RefSeq) indole-3-acetic acid-amido synthetase GH3.6-like (A)	ko04075: Plant hormone signal transduction
Solyc01g107390.3	2.12667	1.10333	-0.946725	K14487 auxin responsive GH3 gene family | (RefSeq) probable indole-3-acetic acid-amido synthetase GH3.1 (A)	ko04075: Plant hormone signal transduction
Solyc02g064804.1	0.666667	0.43	-0.632629	K14487 auxin responsive GH3 gene family | (RefSeq) probable indole-3-acetic acid-amido synthetase GH3.1 (A)	ko04075: Plant hormone signal transduction
Solyc02g064830.3	2.25	1.69	-0.412902	K14487 auxin responsive GH3 gene family | (RefSeq) probable indole-3-acetic acid-amido synthetase GH3.1 (A)	ko04075: Plant hormone signal transduction
Solyc02g092820.3	0	0.0566667	#DIV/0!	K14487 auxin responsive GH3 gene family | (RefSeq) probable indole-3-acetic acid-amido synthetase GH3.1 (A)	ko04075: Plant hormone signal transduction
novel.250	4.21333	2.37	-0.830075	K14487 auxin responsive GH3 gene family | (RefSeq) probable indole-3-acetic acid-amido synthetase GH3.1 (A)	ko04075: Plant hormone signal transduction
Solyc01g091030.3	43.1867	40.0067	-0.110346	K14488 SAUR family protein | (RefSeq) auxin-induced protein 10A5 (A)	ko04075: Plant hormone signal transduction
Solyc10g018340.1	2.91333	2.85333	-0.0300225	K14488 SAUR family protein | (RefSeq) auxin-induced protein 10A5 (A)	ko04075: Plant hormone signal transduction
Solyc01g110840.3	0.0733333	0	#NUM!	K14488 SAUR family protein | (RefSeq) auxin-induced protein 15A (A)	ko04075: Plant hormone signal transduction
Solyc01g110900.1	0.1	0	#NUM!	K14488 SAUR family protein | (RefSeq) auxin-induced protein 15A (A)	ko04075: Plant hormone signal transduction
Solyc03g097510.1	0.116667	0.0366667	-1.66985	K14488 SAUR family protein | (RefSeq) auxin-induced protein 15A (A)	ko04075: Plant hormone signal transduction
Solyc04g052890.2	0.1	0	#NUM!	K14488 SAUR family protein | (RefSeq) auxin-induced protein 15A (A)	ko04075: Plant hormone signal transduction
Solyc04g053020.2	0.126667	0.216667	0.77444	K14488 SAUR family protein | (RefSeq) auxin-induced protein 15A (A)	ko04075: Plant hormone signal transduction
Solyc09g007970.2	0.113333	0.79	2.80128	K14488 SAUR family protein | (RefSeq) auxin-induced protein 15A (A)	ko04075: Plant hormone signal transduction
Solyc10g086200.1	0.1	0.136667	0.450661	K14488 SAUR family protein | (RefSeq) auxin-induced protein 15A (A)	ko04075: Plant hormone signal transduction
Solyc11g011660.2	0.103333	0.0566667	-0.866733	K14488 SAUR family protein | (RefSeq) auxin-induced protein 15A (A)	ko04075: Plant hormone signal transduction
novel.458	0.82	0.786667	-0.0598715	K14488 SAUR family protein | (RefSeq) auxin-induced protein 15A (A)	ko04075: Plant hormone signal transduction
novel.532	0.356667	0.806667	1.1774	K14488 SAUR family protein | (RefSeq) auxin-induced protein 15A (A)	ko04075: Plant hormone signal transduction
Solyc01g110647.1	0	0.33	#DIV/0!	K14488 SAUR family protein | (RefSeq) auxin-induced protein 15A-like (A)	ko04075: Plant hormone signal transduction
Solyc01g110660.3	3.44333	2.1	-0.713417	K14488 SAUR family protein | (RefSeq) auxin-induced protein 15A-like (A)	ko04075: Plant hormone signal transduction
Solyc01g110670.3	3.79333	3.33	-0.187944	K14488 SAUR family protein | (RefSeq) auxin-induced protein 15A-like (A)	ko04075: Plant hormone signal transduction
Solyc01g110680.3	2.04667	2.88333	0.494461	K14488 SAUR family protein | (RefSeq) auxin-induced protein 15A-like (A)	ko04075: Plant hormone signal transduction
Solyc01g110710.3	0.0733333	1.06667	3.8625	K14488 SAUR family protein | (RefSeq) auxin-induced protein 15A-like (A)	ko04075: Plant hormone signal transduction
Solyc01g110730.3	1.30333	1.65	0.34026	K14488 SAUR family protein | (RefSeq) auxin-induced protein 15A-like (A)	ko04075: Plant hormone signal transduction
Solyc01g110735.1	1.71	1.59667	-0.0989332	K14488 SAUR family protein | (RefSeq) auxin-induced protein 15A-like (A)	ko04075: Plant hormone signal transduction
Solyc01g110780.1	0.14	0	#NUM!	K14488 SAUR family protein | (RefSeq) auxin-induced protein 15A-like (A)	ko04075: Plant hormone signal transduction
Solyc01g110785.1	0	0.0733333	#DIV/0!	K14488 SAUR family protein | (RefSeq) auxin-induced protein 15A-like (A)	ko04075: Plant hormone signal transduction
Solyc01g110800.3	0.58	1.14333	0.979121	K14488 SAUR family protein | (RefSeq) auxin-induced protein 15A-like (A)	ko04075: Plant hormone signal transduction
Solyc01g110843.1	2.73	2.30667	-0.243091	K14488 SAUR family protein | (RefSeq) auxin-induced protein 15A-like (A)	ko04075: Plant hormone signal transduction
Solyc01g110860.1	0.196667	0	#NUM!	K14488 SAUR family protein | (RefSeq) auxin-induced protein 15A-like (A)	ko04075: Plant hormone signal transduction
Solyc01g110870.3	0	0.176667	#DIV/0!	K14488 SAUR family protein | (RefSeq) auxin-induced protein 15A-like (A)	ko04075: Plant hormone signal transduction
Solyc01g110880.1	1.85667	0.34	-2.44911	K14488 SAUR family protein | (RefSeq) auxin-induced protein 15A-like (A)	ko04075: Plant hormone signal transduction
Solyc01g110910.3	0.203333	0.4	0.976153	K14488 SAUR family protein | (RefSeq) auxin-induced protein 15A-like (A)	ko04075: Plant hormone signal transduction
Solyc01g110913.1	0.223333	0.206667	-0.111893	K14488 SAUR family protein | (RefSeq) auxin-induced protein 15A-like (A)	ko04075: Plant hormone signal transduction
Solyc01g110917.1	6.74333	4.81667	-0.485427	K14488 SAUR family protein | (RefSeq) auxin-induced protein 15A-like (A)	ko04075: Plant hormone signal transduction
Solyc01g110920.3	12.99	16.5867	0.352623	K14488 SAUR family protein | (RefSeq) auxin-induced protein 15A-like (A)	ko04075: Plant hormone signal transduction
Solyc01g110930.1	0.953333	1.59	0.737974	K14488 SAUR family protein | (RefSeq) auxin-induced protein 15A-like (A)	ko04075: Plant hormone signal transduction
Solyc01g110940.3	1.69667	2.44	0.524178	K14488 SAUR family protein | (RefSeq) auxin-induced protein 15A-like (A)	ko04075: Plant hormone signal transduction
Solyc01g110970.3	3.60333	4.25333	0.239262	K14488 SAUR family protein | (RefSeq) auxin-induced protein 15A-like (A)	ko04075: Plant hormone signal transduction
Solyc01g111010.3	0.356667	0.753333	1.07871	K14488 SAUR family protein | (RefSeq) auxin-induced protein 15A-like (A)	ko04075: Plant hormone signal transduction
Solyc09g009990.3	6.22	7.16	0.203045	K14488 SAUR family protein | (RefSeq) auxin-induced protein 15A-like (A)	ko04075: Plant hormone signal transduction
Solyc01g110560.3	4.50333	5.49667	0.287564	K14488 SAUR family protein | (RefSeq) auxin-induced protein 6B (A)	ko04075: Plant hormone signal transduction
Solyc01g110790.3	0	0.136667	#DIV/0!	K14488 SAUR family protein | (RefSeq) auxin-responsive protein SAUR19-like (A)	ko04075: Plant hormone signal transduction
Solyc04g052970.2	0.776667	0.136667	-2.50663	K14488 SAUR family protein | (RefSeq) auxin-responsive protein SAUR21-like (A)	ko04075: Plant hormone signal transduction
Solyc04g053000.1	1.74	1.66	-0.0679041	K14488 SAUR family protein | (RefSeq) auxin-responsive protein SAUR21-like (A)	ko04075: Plant hormone signal transduction
Solyc10g052540.1	0.643333	1.04333	0.697562	K14488 SAUR family protein | (RefSeq) auxin-responsive protein SAUR21-like (A)	ko04075: Plant hormone signal transduction
Solyc10g052545.1	0.393333	0.543333	0.466085	K14488 SAUR family protein | (RefSeq) auxin-responsive protein SAUR21-like (A)	ko04075: Plant hormone signal transduction
Solyc11g011655.1	0.673333	0	#NUM!	K14488 SAUR family protein | (RefSeq) auxin-responsive protein SAUR21-like (A)	ko04075: Plant hormone signal transduction
Solyc11g011680.1	0.396667	0.13	-1.60942	K14488 SAUR family protein | (RefSeq) auxin-responsive protein SAUR21-like (A)	ko04075: Plant hormone signal transduction
Solyc11g011700.1	0.24	0.0633333	-1.922	K14488 SAUR family protein | (RefSeq) auxin-responsive protein SAUR21-like (A)	ko04075: Plant hormone signal transduction
Solyc11g011720.1	0	0.06	#DIV/0!	K14488 SAUR family protein | (RefSeq) auxin-responsive protein SAUR21-like (A)	ko04075: Plant hormone signal transduction
Solyc01g111000.3	1.6	2.50333	0.645779	K14488 SAUR family protein | (RefSeq) auxin-responsive protein SAUR22-like (A)	ko04075: Plant hormone signal transduction
Solyc01g096340.3	277.937	200.837	-0.468733	K14488 SAUR family protein | (RefSeq) auxin-responsive protein SAUR32 (A)	ko04075: Plant hormone signal transduction
Solyc03g082510.1	60.31	52.91	-0.188857	K14488 SAUR family protein | (RefSeq) auxin-responsive protein SAUR32 (A)	ko04075: Plant hormone signal transduction
Solyc03g082520.1	48.72	42.1167	-0.210123	K14488 SAUR family protein | (RefSeq) auxin-responsive protein SAUR32 (A)	ko04075: Plant hormone signal transduction
Solyc03g082530.1	67.8767	80.4733	0.245595	K14488 SAUR family protein | (RefSeq) auxin-responsive protein SAUR32 (A)	ko04075: Plant hormone signal transduction
Solyc05g056430.2	10.4733	7.95	-0.397694	K14488 SAUR family protein | (RefSeq) auxin-responsive protein SAUR32 (A)	ko04075: Plant hormone signal transduction
Solyc05g056440.2	4.93667	9.02	0.86959	K14488 SAUR family protein | (RefSeq) auxin-responsive protein SAUR32 (A)	ko04075: Plant hormone signal transduction
Solyc06g053290.1	34.7667	27.4067	-0.343178	K14488 SAUR family protein | (RefSeq) auxin-responsive protein SAUR32 (A)	ko04075: Plant hormone signal transduction
Solyc08g007435.1	0	0.0366667	#DIV/0!	K14488 SAUR family protein | (RefSeq) auxin-responsive protein SAUR36-like (A)	ko04075: Plant hormone signal transduction
Solyc08g079140.1	0.826667	0.743333	-0.153296	K14488 SAUR family protein | (RefSeq) auxin-responsive protein SAUR36-like (A)	ko04075: Plant hormone signal transduction
Solyc08g079150.1	0.903333	0.8	-0.175258	K14488 SAUR family protein | (RefSeq) auxin-responsive protein SAUR36-like (A)	ko04075: Plant hormone signal transduction
Solyc01g110590.3	1.46333	0.373333	-1.97072	K14488 SAUR family protein | (RefSeq) auxin-responsive protein SAUR50 (A)	ko04075: Plant hormone signal transduction
Solyc02g062230.1	13.3633	15.8333	0.244685	K14488 SAUR family protein | (RefSeq) auxin-responsive protein SAUR50 (A)	ko04075: Plant hormone signal transduction
Solyc03g033590.1	10.8633	9.93	-0.129601	K14488 SAUR family protein | (RefSeq) auxin-responsive protein SAUR50 (A)	ko04075: Plant hormone signal transduction
Solyc04g081250.1	0	0.416667	#DIV/0!	K14488 SAUR family protein | (RefSeq) auxin-responsive protein SAUR50 (A)	ko04075: Plant hormone signal transduction
Solyc04g081270.1	0.606667	0.216667	-1.48543	K14488 SAUR family protein | (RefSeq) auxin-responsive protein SAUR50 (A)	ko04075: Plant hormone signal transduction
Solyc07g014620.1	0.663333	0.523333	-0.342004	K14488 SAUR family protein | (RefSeq) auxin-responsive protein SAUR50 (A)	ko04075: Plant hormone signal transduction
Solyc10g054720.1	0.593333	0.59	-0.00812788	K14488 SAUR family protein | (RefSeq) auxin-responsive protein SAUR50 (A)	ko04075: Plant hormone signal transduction
Solyc11g069095.1	0.17	0.54	1.66742	K14488 SAUR family protein | (RefSeq) auxin-responsive protein SAUR50 (A)	ko04075: Plant hormone signal transduction
Solyc01g110600.2	0.06	0.21	1.80735	K14488 SAUR family protein | (RefSeq) auxin-responsive protein SAUR50-like (A)	ko04075: Plant hormone signal transduction
Solyc01g110610.3	0	0.09	#DIV/0!	K14488 SAUR family protein | (RefSeq) auxin-responsive protein SAUR50-like (A)	ko04075: Plant hormone signal transduction
Solyc02g084005.1	0.503333	0.996667	0.985597	K14488 SAUR family protein | (RefSeq) auxin-responsive protein SAUR50-like (A)	ko04075: Plant hormone signal transduction
Solyc05g046320.1	0.983333	1.84	0.903953	K14488 SAUR family protein | (RefSeq) auxin-responsive protein SAUR50-like (A)	ko04075: Plant hormone signal transduction
Solyc07g042490.1	41.0333	32.0433	-0.356772	K14488 SAUR family protein | (RefSeq) auxin-responsive protein SAUR71 (A)	ko04075: Plant hormone signal transduction
Solyc07g066560.1	9.00333	10.03	0.15579	K14488 SAUR family protein | (RefSeq) auxin-responsive protein SAUR71 (A)	ko04075: Plant hormone signal transduction
Solyc09g008175.1	0	0.29	#DIV/0!	K14488 SAUR family protein | (RefSeq) auxin-responsive protein SAUR71-like (A)	ko04075: Plant hormone signal transduction
Solyc10g083320.2	0.963333	0.296667	-1.69919	K14488 SAUR family protein | (RefSeq) auxin-responsive protein SAUR71-like (A)	ko04075: Plant hormone signal transduction
Solyc10g084020.1	0.0466667	0.233333	2.32193	K14488 SAUR family protein | (RefSeq) auxin-responsive protein SAUR71-like (A)	ko04075: Plant hormone signal transduction
Solyc10g084023.1	0.24	0.996667	2.05408	K14488 SAUR family protein | (RefSeq) auxin-responsive protein SAUR71-like (A)	ko04075: Plant hormone signal transduction
Solyc10g084037.1	0	0.81	#DIV/0!	K14488 SAUR family protein | (RefSeq) auxin-responsive protein SAUR71-like (A)	ko04075: Plant hormone signal transduction
Solyc03g124030.3	21.61	25.96	0.264591	K14488 SAUR family protein | (RefSeq) auxin-responsive protein SAUR72-like (A)	ko04075: Plant hormone signal transduction
Solyc06g053260.1	244.51	153.68	-0.669964	K14488 SAUR family protein | (RefSeq) small auxin-up protein 58 (A)	ko04075: Plant hormone signal transduction
Solyc11g011605.1	0.19	0	#NUM!	K14488 SAUR family protein | (RefSeq) uncharacterized protein LOC101254455 isoform X2 (A)	ko04075: Plant hormone signal transduction
Solyc05g025920.3	0.11	0.326667	1.57032	K14488 SAUR family protein | (RefSeq) uncharacterized protein LOC101264326 isoform X1 (A)	ko04075: Plant hormone signal transduction
Solyc07g042470.3	3.16	1.92	-0.718818	K14488 SAUR family protein | (RefSeq) uncharacterized protein LOC101268587 isoform X2 (A)	ko04075: Plant hormone signal transduction
Solyc07g047770.3	11.8633	12.8533	0.115633	K14489 arabidopsis histidine kinase 2/3/4 (cytokinin receptor) [EC:2.7.13.3] | (RefSeq) histidine kinase 2 (A)	ko04075: Plant hormone signal transduction
Solyc05g015610.3	14.4267	9.41333	-0.61596	K14489 arabidopsis histidine kinase 2/3/4 (cytokinin receptor) [EC:2.7.13.3] | (RefSeq) histidine kinase 3 (A)	ko04075: Plant hormone signal transduction
Solyc08g068960.3	0.163333	0.0766667	-1.09115	K14489 arabidopsis histidine kinase 2/3/4 (cytokinin receptor) [EC:2.7.13.3] | (RefSeq) histidine kinase 3 (A)	ko04075: Plant hormone signal transduction
Solyc02g083670.3	10.4067	6.94667	-0.583115	K14489 arabidopsis histidine kinase 2/3/4 (cytokinin receptor) [EC:2.7.13.3] | (RefSeq) histidine kinase 4 (A)	ko04075: Plant hormone signal transduction
Solyc04g008110.3	3.26	2.29667	-0.50533	K14489 arabidopsis histidine kinase 2/3/4 (cytokinin receptor) [EC:2.7.13.3] | (RefSeq) histidine kinase 4 (A)	ko04075: Plant hormone signal transduction
Solyc01g080540.3	75.1867	67.0667	-0.164881	K14490 histidine-containing phosphotransfer peotein | (RefSeq) histidine-containing phosphotransfer protein 1 (A)	ko04075: Plant hormone signal transduction
Solyc01g098400.3	0.52	0.2	-1.37851	K14490 histidine-containing phosphotransfer peotein | (RefSeq) histidine-containing phosphotransfer protein 1 (A)	ko04075: Plant hormone signal transduction
Solyc06g084410.3	18.7567	17.58	-0.0934684	K14490 histidine-containing phosphotransfer peotein | (RefSeq) histidine-containing phosphotransfer protein 1 (A)	ko04075: Plant hormone signal transduction
Solyc11g070150.2	0.363333	0.476667	0.391687	K14490 histidine-containing phosphotransfer peotein | (RefSeq) histidine-containing phosphotransfer protein 4 (A)	ko04075: Plant hormone signal transduction
Solyc08g066350.2	15.38	12.99	-0.243654	K14490 histidine-containing phosphotransfer peotein | (RefSeq) histidine-containing phosphotransfer protein 4-like (A)	ko04075: Plant hormone signal transduction
Solyc03g116720.2	0.283333	0.16	-0.824428	K14490 histidine-containing phosphotransfer peotein | (RefSeq) pseudo histidine-containing phosphotransfer protein 6 (A)	ko04075: Plant hormone signal transduction
Solyc01g065540.3	2.70667	1.83	-0.564674	K14491 two-component response regulator ARR-B family | (RefSeq) two-component response regulator ORR24-like (A)	ko04075: Plant hormone signal transduction
Solyc02g076670.3	0.826667	1.07333	0.376721	K14491 two-component response regulator ARR-B family | (RefSeq) two-component response regulator ORR24-like (A)	ko04075: Plant hormone signal transduction
Solyc02g080740.2	0	0.04	#DIV/0!	K14491 two-component response regulator ARR-B family | (RefSeq) two-component response regulator ORR24-like (A)	ko04075: Plant hormone signal transduction
Solyc02g090400.3	9.46	7.9	-0.259988	K14491 two-component response regulator ARR-B family | (RefSeq) two-component response regulator ORR24-like (A)	ko04075: Plant hormone signal transduction
Solyc03g006150.2	0	0.05	#DIV/0!	K14491 two-component response regulator ARR-B family | (RefSeq) two-component response regulator ORR24-like (A)	ko04075: Plant hormone signal transduction
Solyc03g026250.2	3.78333	3.52333	-0.102717	K14491 two-component response regulator ARR-B family | (RefSeq) two-component response regulator ORR24-like (A)	ko04075: Plant hormone signal transduction
Solyc04g008050.3	14.5133	10.8967	-0.413492	K14491 two-component response regulator ARR-B family | (RefSeq) two-component response regulator ORR24-like (A)	ko04075: Plant hormone signal transduction
Solyc04g008480.2	0.136667	0.103333	-0.403356	K14491 two-component response regulator ARR-B family | (RefSeq) two-component response regulator ORR24-like (A)	ko04075: Plant hormone signal transduction
Solyc04g079600.3	1.01667	1.50333	0.564318	K14491 two-component response regulator ARR-B family | (RefSeq) two-component response regulator ORR24-like (A)	ko04075: Plant hormone signal transduction
Solyc05g007890.3	6.49	8.44667	0.380164	K14491 two-component response regulator ARR-B family | (RefSeq) two-component response regulator ORR24-like (A)	ko04075: Plant hormone signal transduction
Solyc05g009720.3	5.73333	3.6	-0.671377	K14491 two-component response regulator ARR-B family | (RefSeq) two-component response regulator ORR24-like (A)	ko04075: Plant hormone signal transduction
Solyc05g051060.3	2.49	2.9	0.219907	K14491 two-component response regulator ARR-B family | (RefSeq) two-component response regulator ORR24-like (A)	ko04075: Plant hormone signal transduction
Solyc05g054390.3	14.1733	12.2267	-0.213148	K14491 two-component response regulator ARR-B family | (RefSeq) two-component response regulator ORR24-like (A)	ko04075: Plant hormone signal transduction
Solyc05g055940.3	52.6433	42.2233	-0.31821	K14491 two-component response regulator ARR-B family | (RefSeq) two-component response regulator ORR24-like (A)	ko04075: Plant hormone signal transduction
Solyc06g005680.3	0.163333	0.0433333	-1.91427	K14491 two-component response regulator ARR-B family | (RefSeq) two-component response regulator ORR24-like (A)	ko04075: Plant hormone signal transduction
Solyc06g008200.3	14.0367	10.2067	-0.459689	K14491 two-component response regulator ARR-B family | (RefSeq) two-component response regulator ORR24-like (A)	ko04075: Plant hormone signal transduction
Solyc06g051060.3	1.76333	1.95	0.145169	K14491 two-component response regulator ARR-B family | (RefSeq) two-component response regulator ORR24-like (A)	ko04075: Plant hormone signal transduction
Solyc06g066340.3	15.88	12.5133	-0.343745	K14491 two-component response regulator ARR-B family | (RefSeq) two-component response regulator ORR24-like (A)	ko04075: Plant hormone signal transduction
Solyc06g076350.3	1.27333	0.79	-0.688686	K14491 two-component response regulator ARR-B family | (RefSeq) two-component response regulator ORR24-like (A)	ko04075: Plant hormone signal transduction
Solyc07g005140.3	4.70333	6.15667	0.388466	K14491 two-component response regulator ARR-B family | (RefSeq) two-component response regulator ORR24-like (A)	ko04075: Plant hormone signal transduction
Solyc07g045000.3	0.373333	0.133333	-1.48543	K14491 two-component response regulator ARR-B family | (RefSeq) two-component response regulator ORR24-like (A)	ko04075: Plant hormone signal transduction
Solyc07g053630.3	50.8667	39.52	-0.364138	K14491 two-component response regulator ARR-B family | (RefSeq) two-component response regulator ORR24-like (A)	ko04075: Plant hormone signal transduction
Solyc08g005260.2	2.05333	2.89667	0.496426	K14491 two-component response regulator ARR-B family | (RefSeq) two-component response regulator ORR24-like (A)	ko04075: Plant hormone signal transduction
Solyc08g076400.3	12.01	7.89333	-0.60553	K14491 two-component response regulator ARR-B family | (RefSeq) two-component response regulator ORR24-like (A)	ko04075: Plant hormone signal transduction
Solyc09g005030.2	1.23	1.15	-0.0970245	K14491 two-component response regulator ARR-B family | (RefSeq) two-component response regulator ORR24-like (A)	ko04075: Plant hormone signal transduction
Solyc09g072830.3	23.0633	20.0733	-0.200321	K14491 two-component response regulator ARR-B family | (RefSeq) two-component response regulator ORR24-like (A)	ko04075: Plant hormone signal transduction
Solyc09g091880.3	1.92	2.9	0.594947	K14491 two-component response regulator ARR-B family | (RefSeq) two-component response regulator ORR24-like (A)	ko04075: Plant hormone signal transduction
Solyc10g008160.3	21.4867	16.18	-0.40923	K14491 two-component response regulator ARR-B family | (RefSeq) two-component response regulator ORR24-like (A)	ko04075: Plant hormone signal transduction
Solyc10g076460.2	0.25	0.34	0.443607	K14491 two-component response regulator ARR-B family | (RefSeq) two-component response regulator ORR24-like (A)	ko04075: Plant hormone signal transduction
Solyc10g078310.2	9.51667	10.3967	0.127593	K14491 two-component response regulator ARR-B family | (RefSeq) two-component response regulator ORR24-like (A)	ko04075: Plant hormone signal transduction
Solyc10g080460.2	0.14	0.0266667	-2.39232	K14491 two-component response regulator ARR-B family | (RefSeq) two-component response regulator ORR24-like (A)	ko04075: Plant hormone signal transduction
Solyc10g080960.1	11.19	11.3167	0.016239	K14491 two-component response regulator ARR-B family | (RefSeq) two-component response regulator ORR24-like (A)	ko04075: Plant hormone signal transduction
Solyc10g083340.2	1.36	1.63667	0.267154	K14491 two-component response regulator ARR-B family | (RefSeq) two-component response regulator ORR24-like (A)	ko04075: Plant hormone signal transduction
Solyc10g085620.2	4.22667	3.84	-0.138414	K14491 two-component response regulator ARR-B family | (RefSeq) two-component response regulator ORR24-like (A)	ko04075: Plant hormone signal transduction
Solyc11g011770.2	3.87	4.49	0.214382	K14491 two-component response regulator ARR-B family | (RefSeq) two-component response regulator ORR24-like (A)	ko04075: Plant hormone signal transduction
Solyc11g022470.2	13.43	15.7167	0.226836	K14491 two-component response regulator ARR-B family | (RefSeq) two-component response regulator ORR24-like (A)	ko04075: Plant hormone signal transduction
Solyc11g067280.2	18.6533	14.8067	-0.333187	K14491 two-component response regulator ARR-B family | (RefSeq) two-component response regulator ORR24-like (A)	ko04075: Plant hormone signal transduction
Solyc12g006280.2	0.183333	0.133333	-0.459432	K14491 two-component response regulator ARR-B family | (RefSeq) two-component response regulator ORR24-like (A)	ko04075: Plant hormone signal transduction
Solyc12g006800.2	6.46667	6.14333	-0.0740006	K14491 two-component response regulator ARR-B family | (RefSeq) two-component response regulator ORR24-like (A)	ko04075: Plant hormone signal transduction
Solyc12g010330.2	6.20333	6.07333	-0.0305551	K14491 two-component response regulator ARR-B family | (RefSeq) two-component response regulator ORR24-like (A)	ko04075: Plant hormone signal transduction
Solyc12g017370.2	11.9767	11.4233	-0.0682427	K14491 two-component response regulator ARR-B family | (RefSeq) two-component response regulator ORR24-like (A)	ko04075: Plant hormone signal transduction
Solyc12g098370.2	9.8	15.63	0.673464	K14491 two-component response regulator ARR-B family | (RefSeq) two-component response regulator ORR24-like (A)	ko04075: Plant hormone signal transduction
Solyc01g091810.1	0.106667	0	#NUM!	K14491 two-component response regulator ARR-B family | (RefSeq) two-component response regulator ORR26 isoform X1 (A)	ko04075: Plant hormone signal transduction
Solyc04g015290.3	9.21333	9.03	-0.0289972	K14491 two-component response regulator ARR-B family | (RefSeq) two-component response regulator ORR26 isoform X1 (A)	ko04075: Plant hormone signal transduction
Solyc05g014260.3	17.9633	13.0733	-0.458428	K14491 two-component response regulator ARR-B family | (RefSeq) two-component response regulator ORR26 isoform X1 (A)	ko04075: Plant hormone signal transduction
Solyc06g061030.3	14.87	12.2033	-0.285129	K14491 two-component response regulator ARR-B family | (RefSeq) two-component response regulator ORR26 isoform X1 (A)	ko04075: Plant hormone signal transduction
Solyc07g009110.2	0.0233333	0	#NUM!	K14491 two-component response regulator ARR-B family | (RefSeq) two-component response regulator ORR26 isoform X1 (A)	ko04075: Plant hormone signal transduction
Solyc08g077230.3	13.74	12.86	-0.0954914	K14491 two-component response regulator ARR-B family | (RefSeq) two-component response regulator ORR26 isoform X1 (A)	ko04075: Plant hormone signal transduction
Solyc10g078720.2	1.52333	0.686667	-1.14955	K14491 two-component response regulator ARR-B family | (RefSeq) two-component response regulator ORR26 isoform X1 (A)	ko04075: Plant hormone signal transduction
Solyc03g113720.3	9.33667	8.62	-0.11522	K14492 two-component response regulator ARR-A family | (RefSeq) two-component response regulator ARR15 (A)	ko04075: Plant hormone signal transduction
Solyc06g048930.3	2.55	2.07	-0.300866	K14492 two-component response regulator ARR-A family | (RefSeq) two-component response regulator ARR17 (A)	ko04075: Plant hormone signal transduction
Solyc06g048600.3	0.0566667	0.266667	2.23447	K14492 two-component response regulator ARR-A family | (RefSeq) two-component response regulator ARR17-like isoform X1 (A)	ko04075: Plant hormone signal transduction
Solyc05g006420.3	23.3667	26.54	0.183716	K14492 two-component response regulator ARR-A family | (RefSeq) two-component response regulator ARR5 (A)	ko04075: Plant hormone signal transduction
Solyc10g079595.1	15.9067	19.2733	0.276975	K14492 two-component response regulator ARR-A family | (RefSeq) two-component response regulator ARR9 (A)	ko04075: Plant hormone signal transduction
Solyc02g071220.3	89.3233	107.34	0.265079	K14492 two-component response regulator ARR-A family | (RefSeq) two-component response regulator ORR3-like (A)	ko04075: Plant hormone signal transduction
Solyc10g079710.2	2.15667	3.63333	0.752491	K14492 two-component response regulator ARR-A family | (RefSeq) two-component response regulator ORR9 (A)	ko04075: Plant hormone signal transduction
Solyc02g069800.1	100.32	57.3633	-0.806408	K14493 gibberellin receptor GID1 [EC:3.-.-.-] | (RefSeq) gibberellin receptor GID1B (A)	ko04075: Plant hormone signal transduction
Solyc05g014320.3	8.47333	7.23667	-0.227604	K14493 gibberellin receptor GID1 [EC:3.-.-.-] | (RefSeq) gibberellin receptor GID1B (A)	ko04075: Plant hormone signal transduction
Solyc05g051670.2	0.126667	0.0233333	-2.44057	K14493 gibberellin receptor GID1 [EC:3.-.-.-] | (RefSeq) gibberellin receptor GID1B (A)	ko04075: Plant hormone signal transduction
Solyc06g035520.3	6.12	2.95667	-1.04956	K14493 gibberellin receptor GID1 [EC:3.-.-.-] | (RefSeq) gibberellin receptor GID1B (A)	ko04075: Plant hormone signal transduction
Solyc07g040890.1	7.44	5.92333	-0.328893	K14493 gibberellin receptor GID1 [EC:3.-.-.-] | (RefSeq) gibberellin receptor GID1B (A)	ko04075: Plant hormone signal transduction
Solyc07g040900.2	0.04	0	#NUM!	K14493 gibberellin receptor GID1 [EC:3.-.-.-] | (RefSeq) gibberellin receptor GID1B (A)	ko04075: Plant hormone signal transduction
Solyc09g075710.2	4.36667	3.80667	-0.198004	K14493 gibberellin receptor GID1 [EC:3.-.-.-] | (RefSeq) gibberellin receptor GID1B (A)	ko04075: Plant hormone signal transduction
Solyc10g050880.1	5.66	1.01333	-2.48169	K14493 gibberellin receptor GID1 [EC:3.-.-.-] | (RefSeq) gibberellin receptor GID1B (A)	ko04075: Plant hormone signal transduction
Solyc01g094010.3	22.4167	29.2433	0.383536	K14493 gibberellin receptor GID1 [EC:3.-.-.-] | (RefSeq) gibberellin receptor GID1C (A)	ko04075: Plant hormone signal transduction
Solyc01g098390.3	18.12	20.2567	0.160814	K14493 gibberellin receptor GID1 [EC:3.-.-.-] | (RefSeq) gibberellin receptor GID1C (A)	ko04075: Plant hormone signal transduction
Solyc01g108560.3	12.5	11.5233	-0.11737	K14493 gibberellin receptor GID1 [EC:3.-.-.-] | (RefSeq) gibberellin receptor GID1C (A)	ko04075: Plant hormone signal transduction
Solyc04g079190.3	16.26	14.06	-0.209731	K14493 gibberellin receptor GID1 [EC:3.-.-.-] | (RefSeq) gibberellin receptor GID1C (A)	ko04075: Plant hormone signal transduction
Solyc05g051660.1	105.2	94.4767	-0.155105	K14493 gibberellin receptor GID1 [EC:3.-.-.-] | (RefSeq) gibberellin receptor GID1C (A)	ko04075: Plant hormone signal transduction
Solyc06g054290.2	0	0.923333	#DIV/0!	K14493 gibberellin receptor GID1 [EC:3.-.-.-] | (RefSeq) gibberellin receptor GID1C (A)	ko04075: Plant hormone signal transduction
Solyc10g054780.2	60.2633	43.67	-0.464638	K14493 gibberellin receptor GID1 [EC:3.-.-.-] | (RefSeq) gibberellin receptor GID1C (A)	ko04075: Plant hormone signal transduction
Solyc11g045460.2	12.94	5.08	-1.34894	K14493 gibberellin receptor GID1 [EC:3.-.-.-] | (RefSeq) gibberellin receptor GID1C (A)	ko04075: Plant hormone signal transduction
Solyc01g098140.3	2.30667	1.63	-0.500938	K14493 gibberellin receptor GID1 [EC:3.-.-.-] | (RefSeq) SlGID1b-1; gibberellin receptor GID1b-1 (A)	ko04075: Plant hormone signal transduction
Solyc02g085800.1	0.36	0.183333	-0.973528	K14493 gibberellin receptor GID1 [EC:3.-.-.-] | (RefSeq) SlGID1b-1; gibberellin receptor GID1b-1 (A)	ko04075: Plant hormone signal transduction
Solyc03g005100.3	2.84667	4.1	0.52635	K14493 gibberellin receptor GID1 [EC:3.-.-.-] | (RefSeq) SlGID1b-1; gibberellin receptor GID1b-1 (A)	ko04075: Plant hormone signal transduction
Solyc04g005230.3	0.02	0	#NUM!	K14493 gibberellin receptor GID1 [EC:3.-.-.-] | (RefSeq) SlGID1b-1; gibberellin receptor GID1b-1 (A)	ko04075: Plant hormone signal transduction
Solyc05g009610.1	82.3733	71.43	-0.205647	K14493 gibberellin receptor GID1 [EC:3.-.-.-] | (RefSeq) SlGID1b-1; gibberellin receptor GID1b-1 (A)	ko04075: Plant hormone signal transduction
Solyc07g040880.3	0.37	0.143333	-1.36815	K14493 gibberellin receptor GID1 [EC:3.-.-.-] | (RefSeq) SlGID1b-1; gibberellin receptor GID1b-1 (A)	ko04075: Plant hormone signal transduction
Solyc09g074270.3	28.98	23.6667	-0.292201	K14493 gibberellin receptor GID1 [EC:3.-.-.-] | (RefSeq) SlGID1b-1; gibberellin receptor GID1b-1 (A)	ko04075: Plant hormone signal transduction
Solyc03g123400.1	1.84	1.29667	-0.504898	K14494 DELLA protein | (RefSeq) DELLA protein GAI (A)	ko04075: Plant hormone signal transduction
Solyc04g064550.1	19.07	16.2367	-0.232049	K14494 DELLA protein | (RefSeq) DELLA protein GAI (A)	ko04075: Plant hormone signal transduction
Solyc12g049320.2	0.196667	0.0566667	-1.79518	K14494 DELLA protein | (RefSeq) DELLA protein GAI (A)	ko04075: Plant hormone signal transduction
Solyc10g086370.2	0.526667	0.71	0.430929	K14494 DELLA protein | (RefSeq) DELLA protein GAI-like (A)	ko04075: Plant hormone signal transduction
Solyc01g008910.2	2.95667	2.87667	-0.0395735	K14494 DELLA protein | (RefSeq) GAI; DELLA protein GAI (A)	ko04075: Plant hormone signal transduction
Solyc01g059950.1	0.29	0.613333	1.08062	K14494 DELLA protein | (RefSeq) GAI; DELLA protein GAI (A)	ko04075: Plant hormone signal transduction
Solyc01g079370.3	0.103333	0	#NUM!	K14494 DELLA protein | (RefSeq) GAI; DELLA protein GAI (A)	ko04075: Plant hormone signal transduction
Solyc01g090950.3	17.05	16.76	-0.0247496	K14494 DELLA protein | (RefSeq) GAI; DELLA protein GAI (A)	ko04075: Plant hormone signal transduction
Solyc02g085340.1	10.0033	10.6033	0.0840371	K14494 DELLA protein | (RefSeq) GAI; DELLA protein GAI (A)	ko04075: Plant hormone signal transduction
Solyc02g085600.1	23.9467	22.9633	-0.0604928	K14494 DELLA protein | (RefSeq) GAI; DELLA protein GAI (A)	ko04075: Plant hormone signal transduction
Solyc02g092370.1	2.8	3.59333	0.359896	K14494 DELLA protein | (RefSeq) GAI; DELLA protein GAI (A)	ko04075: Plant hormone signal transduction
Solyc02g092570.1	0.42	0.306667	-0.453718	K14494 DELLA protein | (RefSeq) GAI; DELLA protein GAI (A)	ko04075: Plant hormone signal transduction
Solyc03g025170.1	27.92	36.83	0.399582	K14494 DELLA protein | (RefSeq) GAI; DELLA protein GAI (A)	ko04075: Plant hormone signal transduction
Solyc04g011630.2	11.1	9.81333	-0.177745	K14494 DELLA protein | (RefSeq) GAI; DELLA protein GAI (A)	ko04075: Plant hormone signal transduction
Solyc04g014830.2	1.71	2.98333	0.802929	K14494 DELLA protein | (RefSeq) GAI; DELLA protein GAI (A)	ko04075: Plant hormone signal transduction
Solyc05g053090.2	3.57	3.33333	-0.0989585	K14494 DELLA protein | (RefSeq) GAI; DELLA protein GAI (A)	ko04075: Plant hormone signal transduction
Solyc05g053420.1	0.05	0.0766667	0.616671	K14494 DELLA protein | (RefSeq) GAI; DELLA protein GAI (A)	ko04075: Plant hormone signal transduction
Solyc05g054170.3	8.56667	9.78667	0.192084	K14494 DELLA protein | (RefSeq) GAI; DELLA protein GAI (A)	ko04075: Plant hormone signal transduction
Solyc06g035610.3	0.07	0	#NUM!	K14494 DELLA protein | (RefSeq) GAI; DELLA protein GAI (A)	ko04075: Plant hormone signal transduction
Solyc06g036170.1	25.3833	21.6967	-0.226408	K14494 DELLA protein | (RefSeq) GAI; DELLA protein GAI (A)	ko04075: Plant hormone signal transduction
Solyc06g076280.2	34.7667	31.0767	-0.161873	K14494 DELLA protein | (RefSeq) GAI; DELLA protein GAI (A)	ko04075: Plant hormone signal transduction
Solyc07g043330.2	17.6133	16.5367	-0.0909995	K14494 DELLA protein | (RefSeq) GAI; DELLA protein GAI (A)	ko04075: Plant hormone signal transduction
Solyc07g047950.1	20.2033	18.97	-0.0908737	K14494 DELLA protein | (RefSeq) GAI; DELLA protein GAI (A)	ko04075: Plant hormone signal transduction
Solyc07g052960.2	1.73667	2.03333	0.227526	K14494 DELLA protein | (RefSeq) GAI; DELLA protein GAI (A)	ko04075: Plant hormone signal transduction
Solyc07g063940.2	57.2633	42.5667	-0.427888	K14494 DELLA protein | (RefSeq) GAI; DELLA protein GAI (A)	ko04075: Plant hormone signal transduction
Solyc07g065270.1	6.60667	16.9233	1.35702	K14494 DELLA protein | (RefSeq) GAI; DELLA protein GAI (A)	ko04075: Plant hormone signal transduction
Solyc08g014030.1	2.53333	3.66667	0.533432	K14494 DELLA protein | (RefSeq) GAI; DELLA protein GAI (A)	ko04075: Plant hormone signal transduction
Solyc08g078800.2	9.70667	10.1767	0.0682172	K14494 DELLA protein | (RefSeq) GAI; DELLA protein GAI (A)	ko04075: Plant hormone signal transduction
Solyc08g080400.1	1.5	1.40333	-0.0961048	K14494 DELLA protein | (RefSeq) GAI; DELLA protein GAI (A)	ko04075: Plant hormone signal transduction
Solyc09g010920.1	7.87667	5.21	-0.596302	K14494 DELLA protein | (RefSeq) GAI; DELLA protein GAI (A)	ko04075: Plant hormone signal transduction
Solyc09g018460.1	0.633333	0.17	-1.89743	K14494 DELLA protein | (RefSeq) GAI; DELLA protein GAI (A)	ko04075: Plant hormone signal transduction
Solyc10g074680.2	0.153333	0.146667	-0.0641303	K14494 DELLA protein | (RefSeq) GAI; DELLA protein GAI (A)	ko04075: Plant hormone signal transduction
Solyc10g086530.1	0.47	0.963333	1.03537	K14494 DELLA protein | (RefSeq) GAI; DELLA protein GAI (A)	ko04075: Plant hormone signal transduction
Solyc11g011260.1	44.22	51.2233	0.212102	K14494 DELLA protein | (RefSeq) GAI; DELLA protein GAI (A)	ko04075: Plant hormone signal transduction
Solyc11g012510.2	58.4933	46.71	-0.324541	K14494 DELLA protein | (RefSeq) GAI; DELLA protein GAI (A)	ko04075: Plant hormone signal transduction
Solyc11g013150.1	1.34	2.06	0.620411	K14494 DELLA protein | (RefSeq) GAI; DELLA protein GAI (A)	ko04075: Plant hormone signal transduction
Solyc12g005340.2	185.337	181.327	-0.0315572	K14494 DELLA protein | (RefSeq) GAI; DELLA protein GAI (A)	ko04075: Plant hormone signal transduction
Solyc12g099900.1	15.8	11.2367	-0.49171	K14494 DELLA protein | (RefSeq) GAI; DELLA protein GAI (A)	ko04075: Plant hormone signal transduction
Solyc04g078390.2	72.82	81.3167	0.159216	K14495 F-box protein GID2 | (RefSeq) SlGID2; F-box protein GID2 (A)	ko04075: Plant hormone signal transduction
Solyc05g040040.1	0	0.0366667	#DIV/0!	K14495 F-box protein GID2 | (RefSeq) SlGID2; F-box protein GID2 (A)	ko04075: Plant hormone signal transduction
Solyc07g047680.2	2.28333	3.51333	0.621699	K14495 F-box protein GID2 | (RefSeq) SlGID2; F-box protein GID2 (A)	ko04075: Plant hormone signal transduction
Solyc09g065020.3	13.6267	11.5133	-0.243127	K14495 F-box protein GID2 | (RefSeq) SlGID2; F-box protein GID2 (A)	ko04075: Plant hormone signal transduction
Solyc08g065410.2	0.986667	1.35	0.452325	K14496 abscisic acid receptor PYR/PYL family | (RefSeq) abscisic acid receptor PYL2-like (A)	ko04016: MAPK signaling pathway - plant; ko04075: Plant hormone signal transduction
Solyc12g095970.2	6.53333	4.39667	-0.571409	K14496 abscisic acid receptor PYR/PYL family | (RefSeq) abscisic acid receptor PYL2-like (A)	ko04016: MAPK signaling pathway - plant; ko04075: Plant hormone signal transduction
Solyc08g082180.3	27.4733	26.34	-0.0607766	K14496 abscisic acid receptor PYR/PYL family | (RefSeq) abscisic acid receptor PYL3 (A)	ko04016: MAPK signaling pathway - plant; ko04075: Plant hormone signal transduction
Solyc03g095780.2	2.44	2.65	0.119111	K14496 abscisic acid receptor PYR/PYL family | (RefSeq) abscisic acid receptor PYL4 (A)	ko04016: MAPK signaling pathway - plant; ko04075: Plant hormone signal transduction
Solyc06g050500.2	2.54667	7.37333	1.53371	K14496 abscisic acid receptor PYR/PYL family | (RefSeq) abscisic acid receptor PYL4 (A)	ko04016: MAPK signaling pathway - plant; ko04075: Plant hormone signal transduction
Solyc10g085310.1	13.79	15.9867	0.213247	K14496 abscisic acid receptor PYR/PYL family | (RefSeq) abscisic acid receptor PYL4 (A)	ko04016: MAPK signaling pathway - plant; ko04075: Plant hormone signal transduction
Solyc05g005865.1	12.56	6.22	-1.01385	K14496 abscisic acid receptor PYR/PYL family | (RefSeq) abscisic acid receptor PYL4-like (A)	ko04016: MAPK signaling pathway - plant; ko04075: Plant hormone signal transduction
Solyc09g015380.1	0.456667	0	#NUM!	K14496 abscisic acid receptor PYR/PYL family | (RefSeq) abscisic acid receptor PYL4-like (A)	ko04016: MAPK signaling pathway - plant; ko04075: Plant hormone signal transduction
Solyc10g076410.1	1.87333	2.63333	0.491283	K14496 abscisic acid receptor PYR/PYL family | (RefSeq) abscisic acid receptor PYL4-like (A)	ko04016: MAPK signaling pathway - plant; ko04075: Plant hormone signal transduction
Solyc12g055990.2	14.33	16.79	0.228564	K14496 abscisic acid receptor PYR/PYL family | (RefSeq) abscisic acid receptor PYL9 (A)	ko04016: MAPK signaling pathway - plant; ko04075: Plant hormone signal transduction
Solyc06g061180.1	51.0733	49.7367	-0.0382604	K14496 abscisic acid receptor PYR/PYL family | (RefSeq) abscisic acid receptor PYR1 (A)	ko04016: MAPK signaling pathway - plant; ko04075: Plant hormone signal transduction
Solyc08g076960.1	6.37333	8.88667	0.479594	K14496 abscisic acid receptor PYR/PYL family | (RefSeq) abscisic acid receptor PYR1 (A)	ko04016: MAPK signaling pathway - plant; ko04075: Plant hormone signal transduction
Solyc01g095700.3	20.98	18.76	-0.161355	K14496 abscisic acid receptor PYR/PYL family | (RefSeq) regulatory component of ABA receptor3-like (A)	ko04016: MAPK signaling pathway - plant; ko04075: Plant hormone signal transduction
Solyc03g121880.3	87.1833	51.6533	-0.755191	K14497 protein phosphatase 2C [EC:3.1.3.16] | (RefSeq) PP2C-1; protein phosphatase 2C ABI2 homolog (A)	ko04016: MAPK signaling pathway - plant; ko04075: Plant hormone signal transduction
Solyc03g096670.3	16.9133	6.60333	-1.35689	K14497 protein phosphatase 2C [EC:3.1.3.16] | (RefSeq) PP2C-2; protein phosphatase 2C AHG3 homolog (A)	ko04016: MAPK signaling pathway - plant; ko04075: Plant hormone signal transduction
Solyc06g076400.3	29.2467	25.2267	-0.213323	K14497 protein phosphatase 2C [EC:3.1.3.16] | (RefSeq) probable protein phosphatase 2C 24 (A)	ko04016: MAPK signaling pathway - plant; ko04075: Plant hormone signal transduction
Solyc08g062650.3	10.9667	11.1967	0.0299442	K14497 protein phosphatase 2C [EC:3.1.3.16] | (RefSeq) probable protein phosphatase 2C 6 (A)	ko04016: MAPK signaling pathway - plant; ko04075: Plant hormone signal transduction
Solyc09g065650.3	3.01333	4.23667	0.491569	K14497 protein phosphatase 2C [EC:3.1.3.16] | (RefSeq) probable protein phosphatase 2C 6 (A)	ko04016: MAPK signaling pathway - plant; ko04075: Plant hormone signal transduction
Solyc10g076320.2	0.0866667	0.00666667	-3.70044	K14497 protein phosphatase 2C [EC:3.1.3.16] | (RefSeq) probable protein phosphatase 2C 6 (A)	ko04016: MAPK signaling pathway - plant; ko04075: Plant hormone signal transduction
Solyc10g085370.2	0.0166667	0.14	3.07039	K14497 protein phosphatase 2C [EC:3.1.3.16] | (RefSeq) probable protein phosphatase 2C 6 (A)	ko04016: MAPK signaling pathway - plant; ko04075: Plant hormone signal transduction
Solyc03g006920.3	2.62333	1.86	-0.496099	K14497 protein phosphatase 2C [EC:3.1.3.16] | (RefSeq) probable protein phosphatase 2C 75 (A)	ko04016: MAPK signaling pathway - plant; ko04075: Plant hormone signal transduction
Solyc06g082700.1	0.28	0.96	1.77761	K14497 protein phosphatase 2C [EC:3.1.3.16] | (RefSeq) probable protein phosphatase 2C 75 (A)	ko04016: MAPK signaling pathway - plant; ko04075: Plant hormone signal transduction
Solyc03g006960.3	2.47667	2.80333	0.178744	K14497 protein phosphatase 2C [EC:3.1.3.16] | (RefSeq) probable protein phosphatase 2C 75 isoform X2 (A)	ko04016: MAPK signaling pathway - plant; ko04075: Plant hormone signal transduction
Solyc08g065500.2	0.0166667	0	#NUM!	K14497 protein phosphatase 2C [EC:3.1.3.16] | (RefSeq) protein phosphatase 2C (A)	ko04016: MAPK signaling pathway - plant; ko04075: Plant hormone signal transduction
Solyc08g065540.3	0.423333	0.0566667	-2.90122	K14497 protein phosphatase 2C [EC:3.1.3.16] | (RefSeq) protein phosphatase 2C (A)	ko04016: MAPK signaling pathway - plant; ko04075: Plant hormone signal transduction
Solyc05g052980.3	151.263	154.653	0.0319756	K14497 protein phosphatase 2C [EC:3.1.3.16] | (RefSeq) protein phosphatase 2C 37 (A)	ko04016: MAPK signaling pathway - plant; ko04075: Plant hormone signal transduction
Solyc10g008490.3	2.64	2.87667	0.12386	K14497 protein phosphatase 2C [EC:3.1.3.16] | (RefSeq) protein phosphatase 2C 37 (A)	ko04016: MAPK signaling pathway - plant; ko04075: Plant hormone signal transduction
Solyc07g040990.3	16.8167	12.5267	-0.424889	K14497 protein phosphatase 2C [EC:3.1.3.16] | (RefSeq) protein phosphatase 2C 50 isoform X2 (A)	ko04016: MAPK signaling pathway - plant; ko04075: Plant hormone signal transduction
Solyc03g007230.3	1.88	1.12667	-0.738672	K14497 protein phosphatase 2C [EC:3.1.3.16] | (RefSeq) protein phosphatase 2C 51-like (A)	ko04016: MAPK signaling pathway - plant; ko04075: Plant hormone signal transduction
Solyc06g084100.3	0.0166667	0.04	1.26303	K14497 protein phosphatase 2C [EC:3.1.3.16] | (RefSeq) protein phosphatase 2C 51-like (A)	ko04016: MAPK signaling pathway - plant; ko04075: Plant hormone signal transduction
Solyc07g054300.3	10.7267	14.2367	0.40841	K14497 protein phosphatase 2C [EC:3.1.3.16] | (RefSeq) protein phosphatase 2C 51-like (A)	ko04016: MAPK signaling pathway - plant; ko04075: Plant hormone signal transduction
Solyc07g066260.3	28.4233	29.0533	0.0316279	K14497 protein phosphatase 2C [EC:3.1.3.16] | (RefSeq) protein phosphatase 2C 51-like (A)	ko04016: MAPK signaling pathway - plant; ko04075: Plant hormone signal transduction
Solyc12g096020.2	63.24	53.15	-0.250768	K14497 protein phosphatase 2C [EC:3.1.3.16] | (RefSeq) protein phosphatase 2C 53 isoform X1 (A)	ko04016: MAPK signaling pathway - plant; ko04075: Plant hormone signal transduction
Solyc04g074500.3	9.50667	8.80333	-0.11089	K14498 serine/threonine-protein kinase SRK2 [EC:2.7.11.1] | (RefSeq) serine/threonine-protein kinase SAPK2 (A)	ko04016: MAPK signaling pathway - plant; ko04075: Plant hormone signal transduction
Solyc11g010130.2	6.05	9.38667	0.633678	K14498 serine/threonine-protein kinase SRK2 [EC:2.7.11.1] | (RefSeq) serine/threonine-protein kinase SAPK2 (A)	ko04016: MAPK signaling pathway - plant; ko04075: Plant hormone signal transduction
Solyc08g077780.3	30.46	22.5267	-0.435282	K14498 serine/threonine-protein kinase SRK2 [EC:2.7.11.1] | (RefSeq) serine/threonine-protein kinase SAPK3 (A)	ko04016: MAPK signaling pathway - plant; ko04075: Plant hormone signal transduction
Solyc01g103940.3	55.4967	54.1533	-0.035351	K14498 serine/threonine-protein kinase SRK2 [EC:2.7.11.1] | (RefSeq) serine/threonine-protein kinase SRK2B (A)	ko04016: MAPK signaling pathway - plant; ko04075: Plant hormone signal transduction
Solyc01g108280.3	19.8233	17.7133	-0.162364	K14498 serine/threonine-protein kinase SRK2 [EC:2.7.11.1] | (RefSeq) serine/threonine-protein kinase SRK2E (A)	ko04016: MAPK signaling pathway - plant; ko04075: Plant hormone signal transduction
Solyc02g090390.3	4.28	5.44333	0.34688	K14498 serine/threonine-protein kinase SRK2 [EC:2.7.11.1] | (RefSeq) serine/threonine-protein kinase SRK2I isoform X1 (A)	ko04016: MAPK signaling pathway - plant; ko04075: Plant hormone signal transduction
Solyc04g012160.3	41.8167	42.7733	0.0326336	K14498 serine/threonine-protein kinase SRK2 [EC:2.7.11.1] | (RefSeq) SRK2C; SNF1-related kinase (A)	ko04016: MAPK signaling pathway - plant; ko04075: Plant hormone signal transduction
Solyc04g079110.1	24.08	17.96	-0.423048	K14499 BRI1 kinase inhibitor 1 | (RefSeq) BRI1 kinase inhibitor 1 (A)	ko04075: Plant hormone signal transduction
Solyc09g075750.1	10.7133	9.01667	-0.248741	K14499 BRI1 kinase inhibitor 1 | (RefSeq) BRI1 kinase inhibitor 1 (A)	ko04075: Plant hormone signal transduction
Solyc12g088870.1	77.6567	75.37	-0.0431194	K14499 BRI1 kinase inhibitor 1 | (RefSeq) BRI1 kinase inhibitor 1 (A)	ko04075: Plant hormone signal transduction
Solyc04g082260.3	1.48333	0.816667	-0.861024	K14500 BR-signaling kinase [EC:2.7.11.1] | (RefSeq) serine/threonine-protein kinase BSK1 (A)	ko04075: Plant hormone signal transduction
Solyc01g080880.3	24.36	21.7733	-0.161952	K14500 BR-signaling kinase [EC:2.7.11.1] | (RefSeq) serine/threonine-protein kinase BSK2 (A)	ko04075: Plant hormone signal transduction
Solyc06g076600.2	2.57333	2.41667	-0.0906199	K14500 BR-signaling kinase [EC:2.7.11.1] | (RefSeq) serine/threonine-protein kinase BSK7 (A)	ko04075: Plant hormone signal transduction
Solyc09g011750.3	1.47667	1.55667	0.0761159	K14500 BR-signaling kinase [EC:2.7.11.1] | (RefSeq) serine/threonine-protein kinase BSK7 (A)	ko04075: Plant hormone signal transduction
Solyc10g085000.2	5.77667	4.68	-0.303729	K14500 BR-signaling kinase [EC:2.7.11.1] | (RefSeq) serine/threonine-protein kinase BSK7 (A)	ko04075: Plant hormone signal transduction
Solyc11g064890.2	23.3633	23.4033	0.0024679	K14500 BR-signaling kinase [EC:2.7.11.1] | (RefSeq) serine/threonine-protein kinase BSK7 (A)	ko04075: Plant hormone signal transduction
Solyc12g099830.2	23.9467	22.42	-0.0950386	K14500 BR-signaling kinase [EC:2.7.11.1] | (RefSeq) serine/threonine-protein kinase BSK7 (A)	ko04075: Plant hormone signal transduction
Solyc02g072300.3	40.1033	42.83	0.0948995	K14502 protein brassinosteroid insensitive 2 [EC:2.7.11.1] | (RefSeq) GSK3 kinase BIN2-like protein (A)	ko04075: Plant hormone signal transduction
Solyc07g055200.3	35.6567	31.7167	-0.168931	K14502 protein brassinosteroid insensitive 2 [EC:2.7.11.1] | (RefSeq) shaggy-related protein kinase eta (A)	ko04075: Plant hormone signal transduction
Solyc03g006070.3	18.1833	19.12	0.0724658	K14502 protein brassinosteroid insensitive 2 [EC:2.7.11.1] | (RefSeq) shaggy-related protein kinase eta isoform X1 (A)	ko04075: Plant hormone signal transduction
Solyc02g063010.3	40.3933	41.39	0.035165	K14503 brassinosteroid resistant 1/2 | (RefSeq) BES1/BZR1 homolog protein 2 (A)	ko04075: Plant hormone signal transduction
Solyc02g071990.3	10.2067	11.1733	0.130548	K14503 brassinosteroid resistant 1/2 | (RefSeq) BES1/BZR1 homolog protein 2 (A)	ko04075: Plant hormone signal transduction
Solyc07g062260.3	5.05333	4.76667	-0.0842546	K14503 brassinosteroid resistant 1/2 | (RefSeq) BES1/BZR1 homolog protein 2 (A)	ko04075: Plant hormone signal transduction
Solyc03g005990.3	8.31	10.7133	0.366487	K14503 brassinosteroid resistant 1/2 | (RefSeq) LAT61; mature anther-specific protein LAT61 (A)	ko04075: Plant hormone signal transduction
Solyc12g089040.2	56.49	51.9567	-0.120687	K14503 brassinosteroid resistant 1/2 | (RefSeq) LAT61; mature anther-specific protein LAT61 (A)	ko04075: Plant hormone signal transduction
Solyc04g079980.3	14.0067	14.6733	0.067083	K14503 brassinosteroid resistant 1/2 | (RefSeq) protein BRASSINAZOLE-RESISTANT 1 (A)	ko04075: Plant hormone signal transduction
Solyc03g093120.3	35.3433	31.9933	-0.143667	K14504 xyloglucan:xyloglucosyl transferase TCH4 [EC:2.4.1.207] | (RefSeq) probable xyloglucan endotransglucosylase/hydrolase protein 23 (A)	ko04075: Plant hormone signal transduction
Solyc05g046290.3	0.533333	0.303333	-0.814133	K14504 xyloglucan:xyloglucosyl transferase TCH4 [EC:2.4.1.207] | (RefSeq) probable xyloglucan endotransglucosylase/hydrolase protein 23 (A)	ko04075: Plant hormone signal transduction
Solyc07g006850.2	12.2533	4.99667	-1.29414	K14504 xyloglucan:xyloglucosyl transferase TCH4 [EC:2.4.1.207] | (RefSeq) probable xyloglucan endotransglucosylase/hydrolase protein 25 (A)	ko04075: Plant hormone signal transduction
Solyc12g017230.2	1.07	0.916667	-0.223142	K14504 xyloglucan:xyloglucosyl transferase TCH4 [EC:2.4.1.207] | (RefSeq) tXET-B1; xyloglucan endo-transglycosylase precursor (A)	ko04075: Plant hormone signal transduction
Solyc07g056000.3	138.69	169.743	0.291491	K14504 xyloglucan:xyloglucosyl transferase TCH4 [EC:2.4.1.207] | (RefSeq) tXET-B2; xyloglycan endo-transglycosylase precursor (A)	ko04075: Plant hormone signal transduction
Solyc03g093130.3	43.6967	41.5767	-0.0717491	K14504 xyloglucan:xyloglucosyl transferase TCH4 [EC:2.4.1.207] | (RefSeq) XTH3; xyloglucan endotransglucosylase-hydrolase XTH3 precursor (A)	ko04075: Plant hormone signal transduction
Solyc02g092980.3	13.9833	12.8567	-0.121192	K14505 cyclin D3, plant | (RefSeq) cycD3; cyclin D3.1 (A)	ko04075: Plant hormone signal transduction
Solyc01g107730.3	4.01333	2.86	-0.488786	K14505 cyclin D3, plant | (RefSeq) cycd3c2; D-type cyclin-2 (A)	ko04075: Plant hormone signal transduction
Solyc04g078470.3	8.65667	8.21	-0.0764294	K14505 cyclin D3, plant | (RefSeq) cycd3c3; D-type cyclin-3 (A)	ko04075: Plant hormone signal transduction
Solyc12g088650.2	5.88667	5.72333	-0.0405953	K14505 cyclin D3, plant | (RefSeq) cyclin-D3-3 (A)	ko04075: Plant hormone signal transduction
Solyc05g050280.3	24.6833	23.5933	-0.065158	K14506 jasmonic acid-amino synthetase [EC:6.3.2.52] | (RefSeq) jasmonic acid-amido synthetase JAR1 (A)	ko04075: Plant hormone signal transduction
Solyc06g048710.2	0	0.05	#DIV/0!	K14506 jasmonic acid-amino synthetase [EC:6.3.2.52] | (RefSeq) jasmonic acid-amido synthetase JAR1 (A)	ko04075: Plant hormone signal transduction
Solyc10g011660.3	22.0467	31.5367	0.51647	K14506 jasmonic acid-amino synthetase [EC:6.3.2.52] | (RefSeq) jasmonic acid-amido synthetase JAR1 (A)	ko04075: Plant hormone signal transduction
Solyc01g095580.3	28.3	23.48	-0.26937	K14506 jasmonic acid-amino synthetase [EC:6.3.2.52] | (RefSeq) jasmonic acid-amido synthetase JAR1-like (A)	ko04075: Plant hormone signal transduction
Solyc10g009610.2	0.00666667	0	#NUM!	K14506 jasmonic acid-amino synthetase [EC:6.3.2.52] | (RefSeq) jasmonic acid-amido synthetase JAR1-like (A)	ko04075: Plant hormone signal transduction
Solyc10g011650.3	0.00666667	0.0433333	2.70044	K14506 jasmonic acid-amino synthetase [EC:6.3.2.52] | (RefSeq) jasmonic acid-amido synthetase JAR1-like (A)	ko04075: Plant hormone signal transduction
Solyc07g040685.1	0.313333	0.473333	0.595158	K14508 regulatory protein NPR1 | (RefSeq) NIM1; non-inducible immunity 1 (A)	ko04075: Plant hormone signal transduction
Solyc07g040690.3	8.39333	6.92333	-0.277777	K14508 regulatory protein NPR1 | (RefSeq) NIM1; non-inducible immunity 1 (A)	ko04075: Plant hormone signal transduction
Solyc02g069310.3	13.21	12.6467	-0.0628733	K14508 regulatory protein NPR1 | (RefSeq) NML1; NIM1-like protein 1 (A)	ko04075: Plant hormone signal transduction
Solyc07g044980.3	56.1067	47.0533	-0.253875	K14508 regulatory protein NPR1 | (RefSeq) NML2; NIM1-like protein 2 (A)	ko04075: Plant hormone signal transduction
Solyc04g040220.3	1.57	1.42667	-0.138116	K14508 regulatory protein NPR1 | (RefSeq) regulatory protein NPR5 (A)	ko04075: Plant hormone signal transduction
Solyc10g079460.1	0.196667	0.313333	0.671946	K14508 regulatory protein NPR1 | (RefSeq) regulatory protein NPR5 (A)	ko04075: Plant hormone signal transduction
Solyc10g079750.2	6.09333	4.44667	-0.454507	K14508 regulatory protein NPR1 | (RefSeq) regulatory protein NPR5 (A)	ko04075: Plant hormone signal transduction
Solyc12g011330.3	7.91667	6.71333	-0.237864	K14509 ethylene receptor [EC:2.7.13.-] | (RefSeq) ETR1; ethylene receptor 1 (A)	ko04016: MAPK signaling pathway - plant; ko04075: Plant hormone signal transduction
Solyc07g056580.3	6.67667	6.81	0.0285268	K14509 ethylene receptor [EC:2.7.13.-] | (RefSeq) ETR2; ethylene receptor 2 (A)	ko04016: MAPK signaling pathway - plant; ko04075: Plant hormone signal transduction
Solyc09g075440.3	14.0467	11.2667	-0.318167	K14509 ethylene receptor [EC:2.7.13.-] | (RefSeq) ETR3; ethylene receptor neverripe (A)	ko04016: MAPK signaling pathway - plant; ko04075: Plant hormone signal transduction
Solyc06g053710.3	3.46333	2.29667	-0.59262	K14509 ethylene receptor [EC:2.7.13.-] | (RefSeq) ETR4; ethylene receptor homolog precursor (A)	ko04016: MAPK signaling pathway - plant; ko04075: Plant hormone signal transduction
Solyc11g006115.1	2.60333	3.56333	0.452867	K14509 ethylene receptor [EC:2.7.13.-] | (RefSeq) ETR5; ethylene receptor homolog precursor (A)	ko04016: MAPK signaling pathway - plant; ko04075: Plant hormone signal transduction
Solyc11g006145.1	6.3	4.93333	-0.352789	K14509 ethylene receptor [EC:2.7.13.-] | (RefSeq) ETR5; ethylene receptor homolog precursor (A)	ko04016: MAPK signaling pathway - plant; ko04075: Plant hormone signal transduction
Solyc11g006170.2	4.76	5.15333	0.114544	K14509 ethylene receptor [EC:2.7.13.-] | (RefSeq) ETR5; ethylene receptor homolog precursor (A)	ko04016: MAPK signaling pathway - plant; ko04075: Plant hormone signal transduction
Solyc11g006180.2	4.77	5.37333	0.171828	K14509 ethylene receptor [EC:2.7.13.-] | (RefSeq) ETR5; ethylene receptor homolog precursor (A)	ko04016: MAPK signaling pathway - plant; ko04075: Plant hormone signal transduction
Solyc09g089610.3	0.376667	0.323333	-0.220266	K14509 ethylene receptor [EC:2.7.13.-] | (RefSeq) ETR6; ethylene receptor precursor (A)	ko04016: MAPK signaling pathway - plant; ko04075: Plant hormone signal transduction
Solyc05g055070.3	6.42667	4.86333	-0.402125	K14509 ethylene receptor [EC:2.7.13.-] | (RefSeq) protein EIN4-like (A)	ko04016: MAPK signaling pathway - plant; ko04075: Plant hormone signal transduction
Solyc01g111880.3	1.08333	1.83	0.756366	K14510 serine/threonine-protein kinase CTR1 [EC:2.7.11.1] | (RefSeq) CTR3; CTR1-like protein kinase (A)	ko04016: MAPK signaling pathway - plant; ko04075: Plant hormone signal transduction
Solyc02g031860.3	18.09	16.3533	-0.145608	K14510 serine/threonine-protein kinase CTR1 [EC:2.7.11.1] | (RefSeq) CTR3; CTR1-like protein kinase (A)	ko04016: MAPK signaling pathway - plant; ko04075: Plant hormone signal transduction
Solyc02g085620.3	0.276667	0.283333	0.0343515	K14510 serine/threonine-protein kinase CTR1 [EC:2.7.11.1] | (RefSeq) CTR3; CTR1-like protein kinase (A)	ko04016: MAPK signaling pathway - plant; ko04075: Plant hormone signal transduction
Solyc03g114210.3	6.1	6.19333	0.0219069	K14510 serine/threonine-protein kinase CTR1 [EC:2.7.11.1] | (RefSeq) CTR3; CTR1-like protein kinase (A)	ko04016: MAPK signaling pathway - plant; ko04075: Plant hormone signal transduction
Solyc03g121780.1	0.0933333	0.203333	1.12338	K14510 serine/threonine-protein kinase CTR1 [EC:2.7.11.1] | (RefSeq) CTR3; CTR1-like protein kinase (A)	ko04016: MAPK signaling pathway - plant; ko04075: Plant hormone signal transduction
Solyc04g076480.3	3.74333	3.06667	-0.287652	K14510 serine/threonine-protein kinase CTR1 [EC:2.7.11.1] | (RefSeq) CTR3; CTR1-like protein kinase (A)	ko04016: MAPK signaling pathway - plant; ko04075: Plant hormone signal transduction
Solyc07g006760.3	8.83333	5.76333	-0.616054	K14510 serine/threonine-protein kinase CTR1 [EC:2.7.11.1] | (RefSeq) CTR3; CTR1-like protein kinase (A)	ko04016: MAPK signaling pathway - plant; ko04075: Plant hormone signal transduction
Solyc07g007125.1	1.15333	0.266667	-2.1127	K14510 serine/threonine-protein kinase CTR1 [EC:2.7.11.1] | (RefSeq) CTR3; CTR1-like protein kinase (A)	ko04016: MAPK signaling pathway - plant; ko04075: Plant hormone signal transduction
Solyc07g055120.3	0.0433333	0.116667	1.42884	K14510 serine/threonine-protein kinase CTR1 [EC:2.7.11.1] | (RefSeq) CTR3; CTR1-like protein kinase (A)	ko04016: MAPK signaling pathway - plant; ko04075: Plant hormone signal transduction
Solyc07g055130.3	2.00333	2	-0.00240249	K14510 serine/threonine-protein kinase CTR1 [EC:2.7.11.1] | (RefSeq) CTR3; CTR1-like protein kinase (A)	ko04016: MAPK signaling pathway - plant; ko04075: Plant hormone signal transduction
Solyc09g009090.3	8.39667	7.28	-0.205878	K14510 serine/threonine-protein kinase CTR1 [EC:2.7.11.1] | (RefSeq) CTR3; CTR1-like protein kinase (A)	ko04016: MAPK signaling pathway - plant; ko04075: Plant hormone signal transduction
Solyc12g019410.2	1.94333	2.24667	0.209253	K14510 serine/threonine-protein kinase CTR1 [EC:2.7.11.1] | (RefSeq) CTR3; CTR1-like protein kinase (A)	ko04016: MAPK signaling pathway - plant; ko04075: Plant hormone signal transduction
Solyc12g099250.2	5.63	5.88667	0.064316	K14510 serine/threonine-protein kinase CTR1 [EC:2.7.11.1] | (RefSeq) CTR3; CTR1-like protein kinase (A)	ko04016: MAPK signaling pathway - plant; ko04075: Plant hormone signal transduction
Solyc01g095550.2	0.833333	0.37	-1.17137	K14510 serine/threonine-protein kinase CTR1 [EC:2.7.11.1] | (RefSeq) CTR4; CTR1-like protein kinase (A)	ko04016: MAPK signaling pathway - plant; ko04075: Plant hormone signal transduction
Solyc02g078140.3	14.2533	13.1433	-0.116968	K14510 serine/threonine-protein kinase CTR1 [EC:2.7.11.1] | (RefSeq) CTR4; CTR1-like protein kinase (A)	ko04016: MAPK signaling pathway - plant; ko04075: Plant hormone signal transduction
Solyc09g082470.3	21.3267	16.9567	-0.330806	K14510 serine/threonine-protein kinase CTR1 [EC:2.7.11.1] | (RefSeq) CTR4; CTR1-like protein kinase (A)	ko04016: MAPK signaling pathway - plant; ko04075: Plant hormone signal transduction
Solyc10g045270.2	3.36333	3.92667	0.223413	K14510 serine/threonine-protein kinase CTR1 [EC:2.7.11.1] | (RefSeq) CTR4; CTR1-like protein kinase (A)	ko04016: MAPK signaling pathway - plant; ko04075: Plant hormone signal transduction
Solyc10g085560.2	7.2	5.89667	-0.288097	K14510 serine/threonine-protein kinase CTR1 [EC:2.7.11.1] | (RefSeq) CTR4; CTR1-like protein kinase (A)	ko04016: MAPK signaling pathway - plant; ko04075: Plant hormone signal transduction
Solyc10g085570.2	4.09	3.52333	-0.21516	K14510 serine/threonine-protein kinase CTR1 [EC:2.7.11.1] | (RefSeq) CTR4; CTR1-like protein kinase (A)	ko04016: MAPK signaling pathway - plant; ko04075: Plant hormone signal transduction
Solyc12g013970.2	0.583333	1.33333	1.19265	K14510 serine/threonine-protein kinase CTR1 [EC:2.7.11.1] | (RefSeq) CTR4; CTR1-like protein kinase (A)	ko04016: MAPK signaling pathway - plant; ko04075: Plant hormone signal transduction
Solyc12g013990.2	4.08667	3.79667	-0.106191	K14510 serine/threonine-protein kinase CTR1 [EC:2.7.11.1] | (RefSeq) CTR4; CTR1-like protein kinase (A)	ko04016: MAPK signaling pathway - plant; ko04075: Plant hormone signal transduction
Solyc12g062280.2	18.0133	17.9667	-0.0037424	K14510 serine/threonine-protein kinase CTR1 [EC:2.7.11.1] | (RefSeq) CTR4; CTR1-like protein kinase (A)	ko04016: MAPK signaling pathway - plant; ko04075: Plant hormone signal transduction
Solyc02g031900.2	23.3	21.82	-0.0946789	K14510 serine/threonine-protein kinase CTR1 [EC:2.7.11.1] | (RefSeq) TCTR1; ethylene-inducible CTR1-like protein kinase (A)	ko04016: MAPK signaling pathway - plant; ko04075: Plant hormone signal transduction
Solyc03g006400.3	1.29667	1.46333	0.174451	K14510 serine/threonine-protein kinase CTR1 [EC:2.7.11.1] | (RefSeq) TCTR1; ethylene-inducible CTR1-like protein kinase (A)	ko04016: MAPK signaling pathway - plant; ko04075: Plant hormone signal transduction
Solyc06g007355.1	0.386667	1.53333	1.98751	K14510 serine/threonine-protein kinase CTR1 [EC:2.7.11.1] | (RefSeq) TCTR1; ethylene-inducible CTR1-like protein kinase (A)	ko04016: MAPK signaling pathway - plant; ko04075: Plant hormone signal transduction
Solyc07g007140.3	38.3433	35.9767	-0.0919142	K14510 serine/threonine-protein kinase CTR1 [EC:2.7.11.1] | (RefSeq) TCTR1; ethylene-inducible CTR1-like protein kinase (A)	ko04016: MAPK signaling pathway - plant; ko04075: Plant hormone signal transduction
Solyc09g018040.1	19.38	16.86	-0.200964	K14510 serine/threonine-protein kinase CTR1 [EC:2.7.11.1] | (RefSeq) TCTR1; ethylene-inducible CTR1-like protein kinase (A)	ko04016: MAPK signaling pathway - plant; ko04075: Plant hormone signal transduction
Solyc10g083610.2	4.37667	3.45333	-0.341843	K14510 serine/threonine-protein kinase CTR1 [EC:2.7.11.1] | (RefSeq) TCTR1; ethylene-inducible CTR1-like protein kinase (A)	ko04016: MAPK signaling pathway - plant; ko04075: Plant hormone signal transduction
Solyc08g014420.3	15.94	13.3633	-0.254372	K14512 mitogen-activated protein kinase 6 [EC:2.7.11.24] | (RefSeq) MPK2; mitogen-activated protein kinase 2 (A)	ko04016: MAPK signaling pathway - plant; ko04075: Plant hormone signal transduction; ko04626: Plant-pathogen interaction
Solyc08g014425.1	8.96667	9.15	0.0292	K14512 mitogen-activated protein kinase 6 [EC:2.7.11.24] | (RefSeq) MPK2; mitogen-activated protein kinase 2 (A)	ko04016: MAPK signaling pathway - plant; ko04075: Plant hormone signal transduction; ko04626: Plant-pathogen interaction
Solyc01g080240.3	55.0433	53.42	-0.0431879	K14512 mitogen-activated protein kinase 6 [EC:2.7.11.24] | (RefSeq) mpka1;1; Mitogen-activated protein kinase (A)	ko04016: MAPK signaling pathway - plant; ko04075: Plant hormone signal transduction; ko04626: Plant-pathogen interaction
Solyc04g007710.3	38.57	33.68	-0.195587	K14512 mitogen-activated protein kinase 6 [EC:2.7.11.24] | (RefSeq) mpka1;1; Mitogen-activated protein kinase (A)	ko04016: MAPK signaling pathway - plant; ko04075: Plant hormone signal transduction; ko04626: Plant-pathogen interaction
Solyc07g056350.3	10.0367	12.4933	0.315878	K14512 mitogen-activated protein kinase 6 [EC:2.7.11.24] | (RefSeq) mpka1;1; Mitogen-activated protein kinase (A)	ko04016: MAPK signaling pathway - plant; ko04075: Plant hormone signal transduction; ko04626: Plant-pathogen interaction
Solyc07g062080.3	19.7867	18.98	-0.0600486	K14512 mitogen-activated protein kinase 6 [EC:2.7.11.24] | (RefSeq) mpka1;1; Mitogen-activated protein kinase (A)	ko04016: MAPK signaling pathway - plant; ko04075: Plant hormone signal transduction; ko04626: Plant-pathogen interaction
Solyc12g019460.2	29.48	24.93	-0.241854	K14512 mitogen-activated protein kinase 6 [EC:2.7.11.24] | (RefSeq) mpka1;1; Mitogen-activated protein kinase (A)	ko04016: MAPK signaling pathway - plant; ko04075: Plant hormone signal transduction; ko04626: Plant-pathogen interaction
Solyc12g040680.2	28.6567	31.2933	0.126985	K14512 mitogen-activated protein kinase 6 [EC:2.7.11.24] | (RefSeq) mpka1;1; Mitogen-activated protein kinase (A)	ko04016: MAPK signaling pathway - plant; ko04075: Plant hormone signal transduction; ko04626: Plant-pathogen interaction
Solyc09g005490.1	1.17667	0.443333	-1.40824	K14513 ethylene-insensitive protein 2 | (RefSeq) EIN2; ethylene signaling protein (A)	ko04016: MAPK signaling pathway - plant; ko04075: Plant hormone signal transduction
Solyc09g005520.2	0.32	0	#NUM!	K14513 ethylene-insensitive protein 2 | (RefSeq) EIN2; ethylene signaling protein (A)	ko04016: MAPK signaling pathway - plant; ko04075: Plant hormone signal transduction
Solyc09g007870.3	18.48	16.6367	-0.151598	K14513 ethylene-insensitive protein 2 | (RefSeq) EIN2; ethylene signaling protein (A)	ko04016: MAPK signaling pathway - plant; ko04075: Plant hormone signal transduction
Solyc06g073720.2	41.4267	36.1267	-0.197496	K14514 ethylene-insensitive protein 3 | (RefSeq) EIL1; EIL1 protein (A)	ko04016: MAPK signaling pathway - plant; ko04075: Plant hormone signal transduction
Solyc01g009170.3	27.55	24.11	-0.192421	K14514 ethylene-insensitive protein 3 | (RefSeq) EIL2; EIL2 protein (A)	ko04016: MAPK signaling pathway - plant; ko04075: Plant hormone signal transduction
Solyc01g096810.3	38.4967	36.85	-0.0630689	K14514 ethylene-insensitive protein 3 | (RefSeq) EIL3; EIL3 protein (A)	ko04016: MAPK signaling pathway - plant; ko04075: Plant hormone signal transduction
Solyc06g073730.2	34.24	37.7767	0.141813	K14514 ethylene-insensitive protein 3 | (RefSeq) EIL4; EIN3-like protein (A)	ko04016: MAPK signaling pathway - plant; ko04075: Plant hormone signal transduction
Solyc01g006650.2	0.393333	0.966667	1.29727	K14514 ethylene-insensitive protein 3 | (RefSeq) ETHYLENE INSENSITIVE 3-like 3 protein isoform X1 (A)	ko04016: MAPK signaling pathway - plant; ko04075: Plant hormone signal transduction
Solyc01g014480.3	6.18333	5.51667	-0.164588	K14514 ethylene-insensitive protein 3 | (RefSeq) ETHYLENE INSENSITIVE 3-like 3 protein isoform X1 (A)	ko04016: MAPK signaling pathway - plant; ko04075: Plant hormone signal transduction
Solyc12g009560.2	18.4933	21.52	0.218673	K14515 EIN3-binding F-box protein | (RefSeq) EBF1; EIN3-binding F-box protein 1 (A)	ko04016: MAPK signaling pathway - plant; ko04075: Plant hormone signal transduction
Solyc08g060810.3	26.1267	26.2967	0.00935686	K14515 EIN3-binding F-box protein | (RefSeq) EBF2; EIN3-binding F-box protein 2 (A)	ko04016: MAPK signaling pathway - plant; ko04075: Plant hormone signal transduction
Solyc07g008250.3	16.0367	14.44	-0.151304	K14515 EIN3-binding F-box protein | (RefSeq) EIN3-binding F-box protein 1 (A)	ko04016: MAPK signaling pathway - plant; ko04075: Plant hormone signal transduction
Solyc01g010500.2	0.186667	0	#NUM!	K14515 EIN3-binding F-box protein | (RefSeq) EIN3-binding F-box protein 1-like (A)	ko04016: MAPK signaling pathway - plant; ko04075: Plant hormone signal transduction
Solyc02g077360.1	0	0.0466667	#DIV/0!	K14516 ethylene-responsive transcription factor 1 | (RefSeq) EREB; ethylene responsive element binding protein (A)	ko04016: MAPK signaling pathway - plant; ko04075: Plant hormone signal transduction
Solyc09g089930.2	9.33	11.39	0.287819	K14516 ethylene-responsive transcription factor 1 | (RefSeq) EREB; ethylene responsive element binding protein (A)	ko04016: MAPK signaling pathway - plant; ko04075: Plant hormone signal transduction
Solyc05g051200.1	2.31	2.37667	0.0410467	K14516 ethylene-responsive transcription factor 1 | (RefSeq) ERF1; ethylene-responsive transcription factor 1 (A)	ko04016: MAPK signaling pathway - plant; ko04075: Plant hormone signal transduction
Solyc03g005500.1	0.573333	0	#NUM!	K14516 ethylene-responsive transcription factor 1 | (RefSeq) ethylene-responsive transcription factor 1B (A)	ko04016: MAPK signaling pathway - plant; ko04075: Plant hormone signal transduction
Solyc04g014530.1	7.51	6.31667	-0.249649	K14516 ethylene-responsive transcription factor 1 | (RefSeq) ethylene-responsive transcription factor 1B (A)	ko04016: MAPK signaling pathway - plant; ko04075: Plant hormone signal transduction
Solyc09g066360.1	0.0766667	0.06	-0.353637	K14516 ethylene-responsive transcription factor 1 | (RefSeq) ethylene-responsive transcription factor 1B (A)	ko04016: MAPK signaling pathway - plant; ko04075: Plant hormone signal transduction
Solyc11g011750.2	6.27667	7.55	0.266478	K14516 ethylene-responsive transcription factor 1 | (RefSeq) ethylene-responsive transcription factor 1B (A)	ko04016: MAPK signaling pathway - plant; ko04075: Plant hormone signal transduction
Solyc01g090790.3	49	47.68	-0.0393975	K16189 phytochrome-interacting factor 4 | (RefSeq) transcription factor PIF4 (A)	ko04075: Plant hormone signal transduction
Solyc02g062690.3	7.61333	5.92	-0.362931	K16189 phytochrome-interacting factor 4 | (RefSeq) transcription factor PIF4 (A)	ko04075: Plant hormone signal transduction
Solyc02g093280.2	0.156667	0.286667	0.871676	K16189 phytochrome-interacting factor 4 | (RefSeq) transcription factor PIF4 (A)	ko04075: Plant hormone signal transduction
Solyc03g097820.2	3.76667	2.77667	-0.439934	K16189 phytochrome-interacting factor 4 | (RefSeq) transcription factor PIF4 (A)	ko04075: Plant hormone signal transduction
Solyc04g005280.3	6.96333	8.30333	0.253913	K16189 phytochrome-interacting factor 4 | (RefSeq) transcription factor PIF4 (A)	ko04075: Plant hormone signal transduction
Solyc04g006990.3	1.96667	1.94333	-0.0172191	K16189 phytochrome-interacting factor 4 | (RefSeq) transcription factor PIF4 (A)	ko04075: Plant hormone signal transduction
Solyc04g076030.2	33.7533	28.9333	-0.222297	K16189 phytochrome-interacting factor 4 | (RefSeq) transcription factor PIF4 (A)	ko04075: Plant hormone signal transduction
Solyc05g009880.3	4.37667	4.98333	0.187279	K16189 phytochrome-interacting factor 4 | (RefSeq) transcription factor PIF4 (A)	ko04075: Plant hormone signal transduction
Solyc06g008030.3	0.846667	1.17667	0.47484	K16189 phytochrome-interacting factor 4 | (RefSeq) transcription factor PIF4 (A)	ko04075: Plant hormone signal transduction
Solyc06g072520.2	0.146667	0.223333	0.606658	K16189 phytochrome-interacting factor 4 | (RefSeq) transcription factor PIF4 (A)	ko04075: Plant hormone signal transduction
Solyc07g043580.3	34.3767	37.7	0.133135	K16189 phytochrome-interacting factor 4 | (RefSeq) transcription factor PIF4 (A)	ko04075: Plant hormone signal transduction
Solyc12g008930.2	0.753333	0.183333	-2.03882	K16189 phytochrome-interacting factor 4 | (RefSeq) transcription factor PIF4 (A)	ko04075: Plant hormone signal transduction
Solyc12g010170.2	0.993333	0.196667	-2.33653	K16189 phytochrome-interacting factor 4 | (RefSeq) transcription factor PIF4 (A)	ko04075: Plant hormone signal transduction
Solyc01g089970.3	389.883	390.5	0.00228006	K00940 nucleoside-diphosphate kinase [EC:2.7.4.6] | (RefSeq) NDK; nucleoside diphosphate kinase (A)	ko00230: Purine metabolism; ko00240: Pyrimidine metabolism; ko01100: Metabolic pathways; ko01110: Biosynthesis of secondary metabolites; ko01240: Biosynthesis of cofactors; ko04016: MAPK signaling pathway - plant
Solyc08g008340.3	17.5767	18.8133	0.098094	K00940 nucleoside-diphosphate kinase [EC:2.7.4.6] | (RefSeq) nucleoside diphosphate kinase 3 (A)	ko00230: Purine metabolism; ko00240: Pyrimidine metabolism; ko01100: Metabolic pathways; ko01110: Biosynthesis of secondary metabolites; ko01240: Biosynthesis of cofactors; ko04016: MAPK signaling pathway - plant
Solyc08g082430.3	201.507	198.643	-0.0206472	K00940 nucleoside-diphosphate kinase [EC:2.7.4.6] | (RefSeq) nucleoside diphosphate kinase 3 (A)	ko00230: Purine metabolism; ko00240: Pyrimidine metabolism; ko01100: Metabolic pathways; ko01110: Biosynthesis of secondary metabolites; ko01240: Biosynthesis of cofactors; ko04016: MAPK signaling pathway - plant
Solyc01g058720.3	199.897	158.68	-0.333134	K02183 calmodulin | (RefSeq) calcium-binding protein CP1 (A)	ko04016: MAPK signaling pathway - plant; ko04070: Phosphatidylinositol signaling system; ko04626: Plant-pathogen interaction
Solyc10g077010.2	189.943	155.657	-0.287202	K02183 calmodulin | (RefSeq) calmodulin (A)	ko04016: MAPK signaling pathway - plant; ko04070: Phosphatidylinositol signaling system; ko04626: Plant-pathogen interaction
Solyc11g072240.2	191.11	224.04	0.229353	K02183 calmodulin | (RefSeq) calmodulin (A)	ko04016: MAPK signaling pathway - plant; ko04070: Phosphatidylinositol signaling system; ko04626: Plant-pathogen interaction
Solyc12g099990.2	63.7633	53.9467	-0.241193	K02183 calmodulin | (RefSeq) calmodulin (A)	ko04016: MAPK signaling pathway - plant; ko04070: Phosphatidylinositol signaling system; ko04626: Plant-pathogen interaction
Solyc02g067220.3	0.0333333	0.276667	3.05311	K02183 calmodulin | (RefSeq) probable calcium-binding protein CML30 (A)	ko04016: MAPK signaling pathway - plant; ko04070: Phosphatidylinositol signaling system; ko04626: Plant-pathogen interaction
Solyc02g088090.1	282.173	235.917	-0.258304	K02183 calmodulin | (RefSeq) probable calcium-binding protein CML30 (A)	ko04016: MAPK signaling pathway - plant; ko04070: Phosphatidylinositol signaling system; ko04626: Plant-pathogen interaction
Solyc06g069740.1	21.3233	12.9633	-0.717996	K02183 calmodulin | (RefSeq) probable calcium-binding protein CML30 (A)	ko04016: MAPK signaling pathway - plant; ko04070: Phosphatidylinositol signaling system; ko04626: Plant-pathogen interaction
Solyc01g008950.3	167.47	182.683	0.125442	K02183 calmodulin | (RefSeq) SlCaM1; calmodulin 1 (A)	ko04016: MAPK signaling pathway - plant; ko04070: Phosphatidylinositol signaling system; ko04626: Plant-pathogen interaction
Solyc10g081170.2	236.497	303.217	0.358529	K02183 calmodulin | (RefSeq) SlCaM2; calmodulin 2 (A)	ko04016: MAPK signaling pathway - plant; ko04070: Phosphatidylinositol signaling system; ko04626: Plant-pathogen interaction
Solyc03g098050.3	345.733	370.84	0.101137	K02183 calmodulin | (RefSeq) SlCaM6; calmodulin (A)	ko04016: MAPK signaling pathway - plant; ko04070: Phosphatidylinositol signaling system; ko04626: Plant-pathogen interaction
Solyc12g094620.2	212.17	311.137	0.552328	K03781 catalase [EC:1.11.1.6] | (RefSeq) cat1; catalase isozyme 1 (A)	ko00380: Tryptophan metabolism; ko00630: Glyoxylate and dicarboxylate metabolism; ko01100: Metabolic pathways; ko01110: Biosynthesis of secondary metabolites; ko01200: Carbon metabolism; ko04016: MAPK signaling pathway - plant; ko04146: Peroxisome
Solyc01g099420.2	3.50667	2.79667	-0.326392	K03781 catalase [EC:1.11.1.6] | (RefSeq) CAT2; catalase isozyme 2 (A)	ko00380: Tryptophan metabolism; ko00630: Glyoxylate and dicarboxylate metabolism; ko01100: Metabolic pathways; ko01110: Biosynthesis of secondary metabolites; ko01200: Carbon metabolism; ko04016: MAPK signaling pathway - plant; ko04146: Peroxisome
Solyc01g100630.2	4.28667	4.36667	0.0266762	K03781 catalase [EC:1.11.1.6] | (RefSeq) CAT2; catalase isozyme 2 (A)	ko00380: Tryptophan metabolism; ko00630: Glyoxylate and dicarboxylate metabolism; ko01100: Metabolic pathways; ko01110: Biosynthesis of secondary metabolites; ko01200: Carbon metabolism; ko04016: MAPK signaling pathway - plant; ko04146: Peroxisome
Solyc01g100640.3	8.34	8.01	-0.0582451	K03781 catalase [EC:1.11.1.6] | (RefSeq) CAT2; catalase isozyme 2 (A)	ko00380: Tryptophan metabolism; ko00630: Glyoxylate and dicarboxylate metabolism; ko01100: Metabolic pathways; ko01110: Biosynthesis of secondary metabolites; ko01200: Carbon metabolism; ko04016: MAPK signaling pathway - plant; ko04146: Peroxisome
Solyc02g082760.3	927.077	875.013	-0.0833836	K03781 catalase [EC:1.11.1.6] | (RefSeq) CAT2; catalase isozyme 2 (A)	ko00380: Tryptophan metabolism; ko00630: Glyoxylate and dicarboxylate metabolism; ko01100: Metabolic pathways; ko01110: Biosynthesis of secondary metabolites; ko01200: Carbon metabolism; ko04016: MAPK signaling pathway - plant; ko04146: Peroxisome
Solyc04g082460.3	2.96667	2.20667	-0.426974	K03781 catalase [EC:1.11.1.6] | (RefSeq) catalase isozyme 3 (A)	ko00380: Tryptophan metabolism; ko00630: Glyoxylate and dicarboxylate metabolism; ko01100: Metabolic pathways; ko01110: Biosynthesis of secondary metabolites; ko01200: Carbon metabolism; ko04016: MAPK signaling pathway - plant; ko04146: Peroxisome
Solyc03g123800.2	59.6867	63.3933	0.0869224	K13413 mitogen-activated protein kinase kinase 4/5 [EC:2.7.12.2] | (RefSeq) MKK2; mitogen-activated protein kinase kinase 2 (A)	ko04016: MAPK signaling pathway - plant; ko04075: Plant hormone signal transduction; ko04626: Plant-pathogen interaction
Solyc01g104530.3	9.93667	8.74667	-0.184029	K13414 mitogen-activated protein kinase kinase kinase 1 [EC:2.7.11.25] | (RefSeq) mitogen-activated protein kinase kinase kinase 1-like (A)	ko04016: MAPK signaling pathway - plant; ko04626: Plant-pathogen interaction
Solyc07g053165.1	53.41	66.6833	0.320216	K13414 mitogen-activated protein kinase kinase kinase 1 [EC:2.7.11.25] | (RefSeq) mitogen-activated protein kinase kinase kinase 1-like (A)	ko04016: MAPK signaling pathway - plant; ko04626: Plant-pathogen interaction
Solyc07g053170.3	30.1133	35.2333	0.226539	K13414 mitogen-activated protein kinase kinase kinase 1 [EC:2.7.11.25] | (RefSeq) mitogen-activated protein kinase kinase kinase 1-like (A)	ko04016: MAPK signaling pathway - plant; ko04626: Plant-pathogen interaction
Solyc01g104050.3	17.1267	20.18	0.236682	K13416 brassinosteroid insensitive 1-associated receptor kinase 1 [EC:2.7.10.1 2.7.11.1] | (RefSeq) SERK3A; somatic embryogenesis receptor kinase 3A precursor (A)	ko04016: MAPK signaling pathway - plant; ko04075: Plant hormone signal transduction; ko04626: Plant-pathogen interaction
Solyc02g071810.3	1.60667	2.34	0.542438	K13416 brassinosteroid insensitive 1-associated receptor kinase 1 [EC:2.7.10.1 2.7.11.1] | (RefSeq) SERK3A; somatic embryogenesis receptor kinase 3A precursor (A)	ko04016: MAPK signaling pathway - plant; ko04075: Plant hormone signal transduction; ko04626: Plant-pathogen interaction
Solyc02g071820.3	1.15667	2.19667	0.925343	K13416 brassinosteroid insensitive 1-associated receptor kinase 1 [EC:2.7.10.1 2.7.11.1] | (RefSeq) SERK3A; somatic embryogenesis receptor kinase 3A precursor (A)	ko04016: MAPK signaling pathway - plant; ko04075: Plant hormone signal transduction; ko04626: Plant-pathogen interaction
Solyc02g071860.3	36.14	35.8433	-0.0118917	K13416 brassinosteroid insensitive 1-associated receptor kinase 1 [EC:2.7.10.1 2.7.11.1] | (RefSeq) SERK3A; somatic embryogenesis receptor kinase 3A precursor (A)	ko04016: MAPK signaling pathway - plant; ko04075: Plant hormone signal transduction; ko04626: Plant-pathogen interaction
Solyc02g071880.3	2.60667	3.18333	0.288332	K13416 brassinosteroid insensitive 1-associated receptor kinase 1 [EC:2.7.10.1 2.7.11.1] | (RefSeq) SERK3A; somatic embryogenesis receptor kinase 3A precursor (A)	ko04016: MAPK signaling pathway - plant; ko04075: Plant hormone signal transduction; ko04626: Plant-pathogen interaction
Solyc02g078170.2	3.42	2.96667	-0.205153	K13416 brassinosteroid insensitive 1-associated receptor kinase 1 [EC:2.7.10.1 2.7.11.1] | (RefSeq) SERK3A; somatic embryogenesis receptor kinase 3A precursor (A)	ko04016: MAPK signaling pathway - plant; ko04075: Plant hormone signal transduction; ko04626: Plant-pathogen interaction
Solyc02g078750.3	2.38	1.86	-0.355659	K13416 brassinosteroid insensitive 1-associated receptor kinase 1 [EC:2.7.10.1 2.7.11.1] | (RefSeq) SERK3A; somatic embryogenesis receptor kinase 3A precursor (A)	ko04016: MAPK signaling pathway - plant; ko04075: Plant hormone signal transduction; ko04626: Plant-pathogen interaction
Solyc02g081470.3	0.426667	0.733333	0.78136	K13416 brassinosteroid insensitive 1-associated receptor kinase 1 [EC:2.7.10.1 2.7.11.1] | (RefSeq) SERK3A; somatic embryogenesis receptor kinase 3A precursor (A)	ko04016: MAPK signaling pathway - plant; ko04075: Plant hormone signal transduction; ko04626: Plant-pathogen interaction
Solyc02g081510.2	0.546667	1.03333	0.918572	K13416 brassinosteroid insensitive 1-associated receptor kinase 1 [EC:2.7.10.1 2.7.11.1] | (RefSeq) SERK3A; somatic embryogenesis receptor kinase 3A precursor (A)	ko04016: MAPK signaling pathway - plant; ko04075: Plant hormone signal transduction; ko04626: Plant-pathogen interaction
Solyc02g085430.3	0.306667	0.223333	-0.457473	K13416 brassinosteroid insensitive 1-associated receptor kinase 1 [EC:2.7.10.1 2.7.11.1] | (RefSeq) SERK3A; somatic embryogenesis receptor kinase 3A precursor (A)	ko04016: MAPK signaling pathway - plant; ko04075: Plant hormone signal transduction; ko04626: Plant-pathogen interaction
Solyc02g092940.3	12.9833	12.69	-0.0329688	K13416 brassinosteroid insensitive 1-associated receptor kinase 1 [EC:2.7.10.1 2.7.11.1] | (RefSeq) SERK3A; somatic embryogenesis receptor kinase 3A precursor (A)	ko04016: MAPK signaling pathway - plant; ko04075: Plant hormone signal transduction; ko04626: Plant-pathogen interaction
Solyc03g007790.3	0.13	0.0866667	-0.584963	K13416 brassinosteroid insensitive 1-associated receptor kinase 1 [EC:2.7.10.1 2.7.11.1] | (RefSeq) SERK3A; somatic embryogenesis receptor kinase 3A precursor (A)	ko04016: MAPK signaling pathway - plant; ko04075: Plant hormone signal transduction; ko04626: Plant-pathogen interaction
Solyc03g034060.3	0.1	0.09	-0.152003	K13416 brassinosteroid insensitive 1-associated receptor kinase 1 [EC:2.7.10.1 2.7.11.1] | (RefSeq) SERK3A; somatic embryogenesis receptor kinase 3A precursor (A)	ko04016: MAPK signaling pathway - plant; ko04075: Plant hormone signal transduction; ko04626: Plant-pathogen interaction
Solyc03g078360.2	7.27	8.11667	0.158932	K13416 brassinosteroid insensitive 1-associated receptor kinase 1 [EC:2.7.10.1 2.7.11.1] | (RefSeq) SERK3A; somatic embryogenesis receptor kinase 3A precursor (A)	ko04016: MAPK signaling pathway - plant; ko04075: Plant hormone signal transduction; ko04626: Plant-pathogen interaction
Solyc03g080060.1	31.33	29.4267	-0.0904206	K13416 brassinosteroid insensitive 1-associated receptor kinase 1 [EC:2.7.10.1 2.7.11.1] | (RefSeq) SERK3A; somatic embryogenesis receptor kinase 3A precursor (A)	ko04016: MAPK signaling pathway - plant; ko04075: Plant hormone signal transduction; ko04626: Plant-pathogen interaction
Solyc03g083510.3	0.29	0.526667	0.860837	K13416 brassinosteroid insensitive 1-associated receptor kinase 1 [EC:2.7.10.1 2.7.11.1] | (RefSeq) SERK3A; somatic embryogenesis receptor kinase 3A precursor (A)	ko04016: MAPK signaling pathway - plant; ko04075: Plant hormone signal transduction; ko04626: Plant-pathogen interaction
Solyc03g095490.3	7.17667	8.02	0.160288	K13416 brassinosteroid insensitive 1-associated receptor kinase 1 [EC:2.7.10.1 2.7.11.1] | (RefSeq) SERK3A; somatic embryogenesis receptor kinase 3A precursor (A)	ko04016: MAPK signaling pathway - plant; ko04075: Plant hormone signal transduction; ko04626: Plant-pathogen interaction
Solyc03g111670.3	30.7	34.27	0.158708	K13416 brassinosteroid insensitive 1-associated receptor kinase 1 [EC:2.7.10.1 2.7.11.1] | (RefSeq) SERK3A; somatic embryogenesis receptor kinase 3A precursor (A)	ko04016: MAPK signaling pathway - plant; ko04075: Plant hormone signal transduction; ko04626: Plant-pathogen interaction
Solyc03g116760.3	12.1667	13.06	0.102221	K13416 brassinosteroid insensitive 1-associated receptor kinase 1 [EC:2.7.10.1 2.7.11.1] | (RefSeq) SERK3A; somatic embryogenesis receptor kinase 3A precursor (A)	ko04016: MAPK signaling pathway - plant; ko04075: Plant hormone signal transduction; ko04626: Plant-pathogen interaction
Solyc04g015460.3	0.806667	1.02	0.338525	K13416 brassinosteroid insensitive 1-associated receptor kinase 1 [EC:2.7.10.1 2.7.11.1] | (RefSeq) SERK3A; somatic embryogenesis receptor kinase 3A precursor (A)	ko04016: MAPK signaling pathway - plant; ko04075: Plant hormone signal transduction; ko04626: Plant-pathogen interaction
Solyc05g005070.3	9.67	10.0467	0.0551291	K13416 brassinosteroid insensitive 1-associated receptor kinase 1 [EC:2.7.10.1 2.7.11.1] | (RefSeq) SERK3A; somatic embryogenesis receptor kinase 3A precursor (A)	ko04016: MAPK signaling pathway - plant; ko04075: Plant hormone signal transduction; ko04626: Plant-pathogen interaction
Solyc05g005125.1	5.16333	5.2	0.0102089	K13416 brassinosteroid insensitive 1-associated receptor kinase 1 [EC:2.7.10.1 2.7.11.1] | (RefSeq) SERK3A; somatic embryogenesis receptor kinase 3A precursor (A)	ko04016: MAPK signaling pathway - plant; ko04075: Plant hormone signal transduction; ko04626: Plant-pathogen interaction
Solyc05g008310.3	3.35	2.21333	-0.59794	K13416 brassinosteroid insensitive 1-associated receptor kinase 1 [EC:2.7.10.1 2.7.11.1] | (RefSeq) SERK3A; somatic embryogenesis receptor kinase 3A precursor (A)	ko04016: MAPK signaling pathway - plant; ko04075: Plant hormone signal transduction; ko04626: Plant-pathogen interaction
Solyc05g018910.2	0	0.116667	#DIV/0!	K13416 brassinosteroid insensitive 1-associated receptor kinase 1 [EC:2.7.10.1 2.7.11.1] | (RefSeq) SERK3A; somatic embryogenesis receptor kinase 3A precursor (A)	ko04016: MAPK signaling pathway - plant; ko04075: Plant hormone signal transduction; ko04626: Plant-pathogen interaction
Solyc05g053010.1	30.7133	30.38	-0.0157432	K13416 brassinosteroid insensitive 1-associated receptor kinase 1 [EC:2.7.10.1 2.7.11.1] | (RefSeq) SERK3A; somatic embryogenesis receptor kinase 3A precursor (A)	ko04016: MAPK signaling pathway - plant; ko04075: Plant hormone signal transduction; ko04626: Plant-pathogen interaction
Solyc06g048560.1	0	0.06	#DIV/0!	K13416 brassinosteroid insensitive 1-associated receptor kinase 1 [EC:2.7.10.1 2.7.11.1] | (RefSeq) SERK3A; somatic embryogenesis receptor kinase 3A precursor (A)	ko04016: MAPK signaling pathway - plant; ko04075: Plant hormone signal transduction; ko04626: Plant-pathogen interaction
Solyc06g048620.3	1.14333	1.49333	0.38529	K13416 brassinosteroid insensitive 1-associated receptor kinase 1 [EC:2.7.10.1 2.7.11.1] | (RefSeq) SERK3A; somatic embryogenesis receptor kinase 3A precursor (A)	ko04016: MAPK signaling pathway - plant; ko04075: Plant hormone signal transduction; ko04626: Plant-pathogen interaction
Solyc06g048950.3	5.09667	6	0.235408	K13416 brassinosteroid insensitive 1-associated receptor kinase 1 [EC:2.7.10.1 2.7.11.1] | (RefSeq) SERK3A; somatic embryogenesis receptor kinase 3A precursor (A)	ko04016: MAPK signaling pathway - plant; ko04075: Plant hormone signal transduction; ko04626: Plant-pathogen interaction
Solyc06g082610.3	9.69333	9.90333	0.0309213	K13416 brassinosteroid insensitive 1-associated receptor kinase 1 [EC:2.7.10.1 2.7.11.1] | (RefSeq) SERK3A; somatic embryogenesis receptor kinase 3A precursor (A)	ko04016: MAPK signaling pathway - plant; ko04075: Plant hormone signal transduction; ko04626: Plant-pathogen interaction
Solyc07g053130.3	18.9533	20.2767	0.0973689	K13416 brassinosteroid insensitive 1-associated receptor kinase 1 [EC:2.7.10.1 2.7.11.1] | (RefSeq) SERK3A; somatic embryogenesis receptor kinase 3A precursor (A)	ko04016: MAPK signaling pathway - plant; ko04075: Plant hormone signal transduction; ko04626: Plant-pathogen interaction
Solyc07g053220.2	22.3633	22.1067	-0.0166537	K13416 brassinosteroid insensitive 1-associated receptor kinase 1 [EC:2.7.10.1 2.7.11.1] | (RefSeq) SERK3A; somatic embryogenesis receptor kinase 3A precursor (A)	ko04016: MAPK signaling pathway - plant; ko04075: Plant hormone signal transduction; ko04626: Plant-pathogen interaction
Solyc07g055570.1	0.433333	0.486667	0.167457	K13416 brassinosteroid insensitive 1-associated receptor kinase 1 [EC:2.7.10.1 2.7.11.1] | (RefSeq) SERK3A; somatic embryogenesis receptor kinase 3A precursor (A)	ko04016: MAPK signaling pathway - plant; ko04075: Plant hormone signal transduction; ko04626: Plant-pathogen interaction
Solyc07g055630.3	24.7133	23.8333	-0.0523089	K13416 brassinosteroid insensitive 1-associated receptor kinase 1 [EC:2.7.10.1 2.7.11.1] | (RefSeq) SERK3A; somatic embryogenesis receptor kinase 3A precursor (A)	ko04016: MAPK signaling pathway - plant; ko04075: Plant hormone signal transduction; ko04626: Plant-pathogen interaction
Solyc07g055810.3	28.4167	43.6633	0.619685	K13416 brassinosteroid insensitive 1-associated receptor kinase 1 [EC:2.7.10.1 2.7.11.1] | (RefSeq) SERK3A; somatic embryogenesis receptor kinase 3A precursor (A)	ko04016: MAPK signaling pathway - plant; ko04075: Plant hormone signal transduction; ko04626: Plant-pathogen interaction
Solyc07g056270.3	12.84	17.3533	0.434568	K13416 brassinosteroid insensitive 1-associated receptor kinase 1 [EC:2.7.10.1 2.7.11.1] | (RefSeq) SERK3A; somatic embryogenesis receptor kinase 3A precursor (A)	ko04016: MAPK signaling pathway - plant; ko04075: Plant hormone signal transduction; ko04626: Plant-pathogen interaction
Solyc07g066550.3	0.283333	0.27	-0.0695409	K13416 brassinosteroid insensitive 1-associated receptor kinase 1 [EC:2.7.10.1 2.7.11.1] | (RefSeq) SERK3A; somatic embryogenesis receptor kinase 3A precursor (A)	ko04016: MAPK signaling pathway - plant; ko04075: Plant hormone signal transduction; ko04626: Plant-pathogen interaction
Solyc08g079460.3	5.65333	6.06	0.100216	K13416 brassinosteroid insensitive 1-associated receptor kinase 1 [EC:2.7.10.1 2.7.11.1] | (RefSeq) SERK3A; somatic embryogenesis receptor kinase 3A precursor (A)	ko04016: MAPK signaling pathway - plant; ko04075: Plant hormone signal transduction; ko04626: Plant-pathogen interaction
Solyc08g081940.3	5.04	5.81	0.205114	K13416 brassinosteroid insensitive 1-associated receptor kinase 1 [EC:2.7.10.1 2.7.11.1] | (RefSeq) SERK3A; somatic embryogenesis receptor kinase 3A precursor (A)	ko04016: MAPK signaling pathway - plant; ko04075: Plant hormone signal transduction; ko04626: Plant-pathogen interaction
Solyc09g007510.2	2.24	1.81333	-0.304855	K13416 brassinosteroid insensitive 1-associated receptor kinase 1 [EC:2.7.10.1 2.7.11.1] | (RefSeq) SERK3A; somatic embryogenesis receptor kinase 3A precursor (A)	ko04016: MAPK signaling pathway - plant; ko04075: Plant hormone signal transduction; ko04626: Plant-pathogen interaction
Solyc09g015520.3	1.89333	2.00667	0.0838726	K13416 brassinosteroid insensitive 1-associated receptor kinase 1 [EC:2.7.10.1 2.7.11.1] | (RefSeq) SERK3A; somatic embryogenesis receptor kinase 3A precursor (A)	ko04016: MAPK signaling pathway - plant; ko04075: Plant hormone signal transduction; ko04626: Plant-pathogen interaction
Solyc09g030450.3	1.37	2.61667	0.933554	K13416 brassinosteroid insensitive 1-associated receptor kinase 1 [EC:2.7.10.1 2.7.11.1] | (RefSeq) SERK3A; somatic embryogenesis receptor kinase 3A precursor (A)	ko04016: MAPK signaling pathway - plant; ko04075: Plant hormone signal transduction; ko04626: Plant-pathogen interaction
Solyc09g075910.1	15.5367	10.9033	-0.510908	K13416 brassinosteroid insensitive 1-associated receptor kinase 1 [EC:2.7.10.1 2.7.11.1] | (RefSeq) SERK3A; somatic embryogenesis receptor kinase 3A precursor (A)	ko04016: MAPK signaling pathway - plant; ko04075: Plant hormone signal transduction; ko04626: Plant-pathogen interaction
Solyc09g091990.3	13.6333	13.3	-0.0357121	K13416 brassinosteroid insensitive 1-associated receptor kinase 1 [EC:2.7.10.1 2.7.11.1] | (RefSeq) SERK3A; somatic embryogenesis receptor kinase 3A precursor (A)	ko04016: MAPK signaling pathway - plant; ko04075: Plant hormone signal transduction; ko04626: Plant-pathogen interaction
Solyc10g005640.3	16.56	13.98	-0.244338	K13416 brassinosteroid insensitive 1-associated receptor kinase 1 [EC:2.7.10.1 2.7.11.1] | (RefSeq) SERK3A; somatic embryogenesis receptor kinase 3A precursor (A)	ko04016: MAPK signaling pathway - plant; ko04075: Plant hormone signal transduction; ko04626: Plant-pathogen interaction
Solyc10g006690.3	6.79333	8.31	0.290729	K13416 brassinosteroid insensitive 1-associated receptor kinase 1 [EC:2.7.10.1 2.7.11.1] | (RefSeq) SERK3A; somatic embryogenesis receptor kinase 3A precursor (A)	ko04016: MAPK signaling pathway - plant; ko04075: Plant hormone signal transduction; ko04626: Plant-pathogen interaction
Solyc10g006710.3	2.27333	1.82	-0.320871	K13416 brassinosteroid insensitive 1-associated receptor kinase 1 [EC:2.7.10.1 2.7.11.1] | (RefSeq) SERK3A; somatic embryogenesis receptor kinase 3A precursor (A)	ko04016: MAPK signaling pathway - plant; ko04075: Plant hormone signal transduction; ko04626: Plant-pathogen interaction
Solyc10g047140.2	14.6967	12.22	-0.266245	K13416 brassinosteroid insensitive 1-associated receptor kinase 1 [EC:2.7.10.1 2.7.11.1] | (RefSeq) SERK3A; somatic embryogenesis receptor kinase 3A precursor (A)	ko04016: MAPK signaling pathway - plant; ko04075: Plant hormone signal transduction; ko04626: Plant-pathogen interaction
Solyc10g076760.2	0.966667	0.97	0.00496625	K13416 brassinosteroid insensitive 1-associated receptor kinase 1 [EC:2.7.10.1 2.7.11.1] | (RefSeq) SERK3A; somatic embryogenesis receptor kinase 3A precursor (A)	ko04016: MAPK signaling pathway - plant; ko04075: Plant hormone signal transduction; ko04626: Plant-pathogen interaction
Solyc10g084250.1	4.03	4.75667	0.239171	K13416 brassinosteroid insensitive 1-associated receptor kinase 1 [EC:2.7.10.1 2.7.11.1] | (RefSeq) SERK3A; somatic embryogenesis receptor kinase 3A precursor (A)	ko04016: MAPK signaling pathway - plant; ko04075: Plant hormone signal transduction; ko04626: Plant-pathogen interaction
Solyc10g084860.1	2.48	2.71333	0.129726	K13416 brassinosteroid insensitive 1-associated receptor kinase 1 [EC:2.7.10.1 2.7.11.1] | (RefSeq) SERK3A; somatic embryogenesis receptor kinase 3A precursor (A)	ko04016: MAPK signaling pathway - plant; ko04075: Plant hormone signal transduction; ko04626: Plant-pathogen interaction
Solyc11g013083.1	0.253333	0.266667	0.0740006	K13416 brassinosteroid insensitive 1-associated receptor kinase 1 [EC:2.7.10.1 2.7.11.1] | (RefSeq) SERK3A; somatic embryogenesis receptor kinase 3A precursor (A)	ko04016: MAPK signaling pathway - plant; ko04075: Plant hormone signal transduction; ko04626: Plant-pathogen interaction
Solyc12g014350.2	1.91667	2.32333	0.277597	K13416 brassinosteroid insensitive 1-associated receptor kinase 1 [EC:2.7.10.1 2.7.11.1] | (RefSeq) SERK3A; somatic embryogenesis receptor kinase 3A precursor (A)	ko04016: MAPK signaling pathway - plant; ko04075: Plant hormone signal transduction; ko04626: Plant-pathogen interaction
novel.2431	0.616667	0.616667	3.20343e-16	K13416 brassinosteroid insensitive 1-associated receptor kinase 1 [EC:2.7.10.1 2.7.11.1] | (RefSeq) SERK3A; somatic embryogenesis receptor kinase 3A precursor (A)	ko04016: MAPK signaling pathway - plant; ko04075: Plant hormone signal transduction; ko04626: Plant-pathogen interaction
Solyc01g009810.3	13.5033	9.33	-0.533367	K13416 brassinosteroid insensitive 1-associated receptor kinase 1 [EC:2.7.10.1 2.7.11.1] | (RefSeq) SERK3B; somatic embryogenesis receptor kinase 3B precursor (A)	ko04016: MAPK signaling pathway - plant; ko04075: Plant hormone signal transduction; ko04626: Plant-pathogen interaction
Solyc01g104970.3	7.68667	6.03	-0.3502	K13416 brassinosteroid insensitive 1-associated receptor kinase 1 [EC:2.7.10.1 2.7.11.1] | (RefSeq) SERK3B; somatic embryogenesis receptor kinase 3B precursor (A)	ko04016: MAPK signaling pathway - plant; ko04075: Plant hormone signal transduction; ko04626: Plant-pathogen interaction
Solyc01g104980.3	0.45	0.526667	0.226965	K13416 brassinosteroid insensitive 1-associated receptor kinase 1 [EC:2.7.10.1 2.7.11.1] | (RefSeq) SERK3B; somatic embryogenesis receptor kinase 3B precursor (A)	ko04016: MAPK signaling pathway - plant; ko04075: Plant hormone signal transduction; ko04626: Plant-pathogen interaction
Solyc01g111950.3	0.0333333	0.0766667	1.20163	K13416 brassinosteroid insensitive 1-associated receptor kinase 1 [EC:2.7.10.1 2.7.11.1] | (RefSeq) SERK3B; somatic embryogenesis receptor kinase 3B precursor (A)	ko04016: MAPK signaling pathway - plant; ko04075: Plant hormone signal transduction; ko04626: Plant-pathogen interaction
Solyc02g072070.3	0.0266667	0.0333333	0.321928	K13416 brassinosteroid insensitive 1-associated receptor kinase 1 [EC:2.7.10.1 2.7.11.1] | (RefSeq) SERK3B; somatic embryogenesis receptor kinase 3B precursor (A)	ko04016: MAPK signaling pathway - plant; ko04075: Plant hormone signal transduction; ko04626: Plant-pathogen interaction
Solyc03g031980.3	4.93	3.33333	-0.564622	K13416 brassinosteroid insensitive 1-associated receptor kinase 1 [EC:2.7.10.1 2.7.11.1] | (RefSeq) SERK3B; somatic embryogenesis receptor kinase 3B precursor (A)	ko04016: MAPK signaling pathway - plant; ko04075: Plant hormone signal transduction; ko04626: Plant-pathogen interaction
Solyc03g112730.3	0.15	0.05	-1.58496	K13416 brassinosteroid insensitive 1-associated receptor kinase 1 [EC:2.7.10.1 2.7.11.1] | (RefSeq) SERK3B; somatic embryogenesis receptor kinase 3B precursor (A)	ko04016: MAPK signaling pathway - plant; ko04075: Plant hormone signal transduction; ko04626: Plant-pathogen interaction
Solyc04g008370.2	2.57333	3.00667	0.224527	K13416 brassinosteroid insensitive 1-associated receptor kinase 1 [EC:2.7.10.1 2.7.11.1] | (RefSeq) SERK3B; somatic embryogenesis receptor kinase 3B precursor (A)	ko04016: MAPK signaling pathway - plant; ko04075: Plant hormone signal transduction; ko04626: Plant-pathogen interaction
Solyc04g077357.1	0.1	0.476667	2.25298	K13416 brassinosteroid insensitive 1-associated receptor kinase 1 [EC:2.7.10.1 2.7.11.1] | (RefSeq) SERK3B; somatic embryogenesis receptor kinase 3B precursor (A)	ko04016: MAPK signaling pathway - plant; ko04075: Plant hormone signal transduction; ko04626: Plant-pathogen interaction
Solyc05g009050.3	11.88	12.8567	0.113982	K13416 brassinosteroid insensitive 1-associated receptor kinase 1 [EC:2.7.10.1 2.7.11.1] | (RefSeq) SERK3B; somatic embryogenesis receptor kinase 3B precursor (A)	ko04016: MAPK signaling pathway - plant; ko04075: Plant hormone signal transduction; ko04626: Plant-pathogen interaction
Solyc05g009090.2	6.23333	7.06	0.179664	K13416 brassinosteroid insensitive 1-associated receptor kinase 1 [EC:2.7.10.1 2.7.11.1] | (RefSeq) SERK3B; somatic embryogenesis receptor kinase 3B precursor (A)	ko04016: MAPK signaling pathway - plant; ko04075: Plant hormone signal transduction; ko04626: Plant-pathogen interaction
Solyc06g068910.3	0.616667	0.483333	-0.351472	K13416 brassinosteroid insensitive 1-associated receptor kinase 1 [EC:2.7.10.1 2.7.11.1] | (RefSeq) SERK3B; somatic embryogenesis receptor kinase 3B precursor (A)	ko04016: MAPK signaling pathway - plant; ko04075: Plant hormone signal transduction; ko04626: Plant-pathogen interaction
Solyc07g053120.3	7.57667	8.97667	0.244617	K13416 brassinosteroid insensitive 1-associated receptor kinase 1 [EC:2.7.10.1 2.7.11.1] | (RefSeq) SERK3B; somatic embryogenesis receptor kinase 3B precursor (A)	ko04016: MAPK signaling pathway - plant; ko04075: Plant hormone signal transduction; ko04626: Plant-pathogen interaction
Solyc07g065610.1	0.336667	0.493333	0.551242	K13416 brassinosteroid insensitive 1-associated receptor kinase 1 [EC:2.7.10.1 2.7.11.1] | (RefSeq) SERK3B; somatic embryogenesis receptor kinase 3B precursor (A)	ko04016: MAPK signaling pathway - plant; ko04075: Plant hormone signal transduction; ko04626: Plant-pathogen interaction
Solyc09g011330.2	7.39667	8.54	0.207361	K13416 brassinosteroid insensitive 1-associated receptor kinase 1 [EC:2.7.10.1 2.7.11.1] | (RefSeq) SERK3B; somatic embryogenesis receptor kinase 3B precursor (A)	ko04016: MAPK signaling pathway - plant; ko04075: Plant hormone signal transduction; ko04626: Plant-pathogen interaction
Solyc09g075920.1	16.84	13.12	-0.360124	K13416 brassinosteroid insensitive 1-associated receptor kinase 1 [EC:2.7.10.1 2.7.11.1] | (RefSeq) SERK3B; somatic embryogenesis receptor kinase 3B precursor (A)	ko04016: MAPK signaling pathway - plant; ko04075: Plant hormone signal transduction; ko04626: Plant-pathogen interaction
Solyc10g051330.2	0	0.00666667	#DIV/0!	K13416 brassinosteroid insensitive 1-associated receptor kinase 1 [EC:2.7.10.1 2.7.11.1] | (RefSeq) SERK3B; somatic embryogenesis receptor kinase 3B precursor (A)	ko04016: MAPK signaling pathway - plant; ko04075: Plant hormone signal transduction; ko04626: Plant-pathogen interaction
Solyc10g081190.2	493.513	389.91	-0.339948	K13416 brassinosteroid insensitive 1-associated receptor kinase 1 [EC:2.7.10.1 2.7.11.1] | (RefSeq) SERK3B; somatic embryogenesis receptor kinase 3B precursor (A)	ko04016: MAPK signaling pathway - plant; ko04075: Plant hormone signal transduction; ko04626: Plant-pathogen interaction
Solyc11g011873.1	0.02	0	#NUM!	K13416 brassinosteroid insensitive 1-associated receptor kinase 1 [EC:2.7.10.1 2.7.11.1] | (RefSeq) SERK3B; somatic embryogenesis receptor kinase 3B precursor (A)	ko04016: MAPK signaling pathway - plant; ko04075: Plant hormone signal transduction; ko04626: Plant-pathogen interaction
Solyc11g011880.2	0.643333	1.48	1.20196	K13416 brassinosteroid insensitive 1-associated receptor kinase 1 [EC:2.7.10.1 2.7.11.1] | (RefSeq) SERK3B; somatic embryogenesis receptor kinase 3B precursor (A)	ko04016: MAPK signaling pathway - plant; ko04075: Plant hormone signal transduction; ko04626: Plant-pathogen interaction
Solyc02g031790.2	1.09667	1.86667	0.767339	K13420 LRR receptor-like serine/threonine-protein kinase FLS2 [EC:2.7.11.1] | (RefSeq) LRR receptor-like serine/threonine-protein kinase EFR (A)	ko04016: MAPK signaling pathway - plant; ko04626: Plant-pathogen interaction
Solyc02g068820.2	7.94667	11.0167	0.471266	K13420 LRR receptor-like serine/threonine-protein kinase FLS2 [EC:2.7.11.1] | (RefSeq) LRR receptor-like serine/threonine-protein kinase EFR (A)	ko04016: MAPK signaling pathway - plant; ko04626: Plant-pathogen interaction
Solyc02g068830.2	19.87	20.4733	0.0431541	K13420 LRR receptor-like serine/threonine-protein kinase FLS2 [EC:2.7.11.1] | (RefSeq) LRR receptor-like serine/threonine-protein kinase EFR (A)	ko04016: MAPK signaling pathway - plant; ko04626: Plant-pathogen interaction
Solyc02g068863.1	2.72333	2.08	-0.38879	K13420 LRR receptor-like serine/threonine-protein kinase FLS2 [EC:2.7.11.1] | (RefSeq) LRR receptor-like serine/threonine-protein kinase EFR (A)	ko04016: MAPK signaling pathway - plant; ko04626: Plant-pathogen interaction
Solyc02g068867.1	0.13	0.0566667	-1.19794	K13420 LRR receptor-like serine/threonine-protein kinase FLS2 [EC:2.7.11.1] | (RefSeq) LRR receptor-like serine/threonine-protein kinase EFR (A)	ko04016: MAPK signaling pathway - plant; ko04626: Plant-pathogen interaction
Solyc03g006100.3	2.07667	2.06	-0.0116253	K13420 LRR receptor-like serine/threonine-protein kinase FLS2 [EC:2.7.11.1] | (RefSeq) LRR receptor-like serine/threonine-protein kinase EFR (A)	ko04016: MAPK signaling pathway - plant; ko04626: Plant-pathogen interaction
Solyc04g014910.3	13.8033	12.8133	-0.107371	K13420 LRR receptor-like serine/threonine-protein kinase FLS2 [EC:2.7.11.1] | (RefSeq) LRR receptor-like serine/threonine-protein kinase EFR (A)	ko04016: MAPK signaling pathway - plant; ko04626: Plant-pathogen interaction
Solyc06g006010.2	0.00333333	0	#NUM!	K13420 LRR receptor-like serine/threonine-protein kinase FLS2 [EC:2.7.11.1] | (RefSeq) LRR receptor-like serine/threonine-protein kinase EFR (A)	ko04016: MAPK signaling pathway - plant; ko04626: Plant-pathogen interaction
Solyc06g006020.2	0.673333	1.20333	0.837644	K13420 LRR receptor-like serine/threonine-protein kinase FLS2 [EC:2.7.11.1] | (RefSeq) LRR receptor-like serine/threonine-protein kinase EFR (A)	ko04016: MAPK signaling pathway - plant; ko04626: Plant-pathogen interaction
Solyc06g006030.1	0	0.13	#DIV/0!	K13420 LRR receptor-like serine/threonine-protein kinase FLS2 [EC:2.7.11.1] | (RefSeq) LRR receptor-like serine/threonine-protein kinase EFR (A)	ko04016: MAPK signaling pathway - plant; ko04626: Plant-pathogen interaction
Solyc06g006040.2	13.6	11.16	-0.28527	K13420 LRR receptor-like serine/threonine-protein kinase FLS2 [EC:2.7.11.1] | (RefSeq) LRR receptor-like serine/threonine-protein kinase EFR (A)	ko04016: MAPK signaling pathway - plant; ko04626: Plant-pathogen interaction
Solyc06g006050.2	0.00666667	0	#NUM!	K13420 LRR receptor-like serine/threonine-protein kinase FLS2 [EC:2.7.11.1] | (RefSeq) LRR receptor-like serine/threonine-protein kinase EFR (A)	ko04016: MAPK signaling pathway - plant; ko04626: Plant-pathogen interaction
Solyc06g006057.1	0.413333	0.403333	-0.0353331	K13420 LRR receptor-like serine/threonine-protein kinase FLS2 [EC:2.7.11.1] | (RefSeq) LRR receptor-like serine/threonine-protein kinase EFR (A)	ko04016: MAPK signaling pathway - plant; ko04626: Plant-pathogen interaction
Solyc06g048740.2	3.53667	3.83667	0.117463	K13420 LRR receptor-like serine/threonine-protein kinase FLS2 [EC:2.7.11.1] | (RefSeq) LRR receptor-like serine/threonine-protein kinase EFR (A)	ko04016: MAPK signaling pathway - plant; ko04626: Plant-pathogen interaction
Solyc08g075600.2	0.00666667	0.0133333	1	K13420 LRR receptor-like serine/threonine-protein kinase FLS2 [EC:2.7.11.1] | (RefSeq) LRR receptor-like serine/threonine-protein kinase EFR (A)	ko04016: MAPK signaling pathway - plant; ko04626: Plant-pathogen interaction
novel.1006	0.356667	1.21333	1.76633	K13420 LRR receptor-like serine/threonine-protein kinase FLS2 [EC:2.7.11.1] | (RefSeq) LRR receptor-like serine/threonine-protein kinase EFR (A)	ko04016: MAPK signaling pathway - plant; ko04626: Plant-pathogen interaction
novel.1007	4.47333	2.43	-0.880394	K13420 LRR receptor-like serine/threonine-protein kinase FLS2 [EC:2.7.11.1] | (RefSeq) LRR receptor-like serine/threonine-protein kinase EFR (A)	ko04016: MAPK signaling pathway - plant; ko04626: Plant-pathogen interaction
Solyc01g005865.1	14.3733	12.7133	-0.177052	K13420 LRR receptor-like serine/threonine-protein kinase FLS2 [EC:2.7.11.1] | (RefSeq) LRR receptor-like serine/threonine-protein kinase FLS2 (A)	ko04016: MAPK signaling pathway - plant; ko04626: Plant-pathogen interaction
Solyc01g009700.2	5.51333	4.74	-0.218038	K13420 LRR receptor-like serine/threonine-protein kinase FLS2 [EC:2.7.11.1] | (RefSeq) LRR receptor-like serine/threonine-protein kinase FLS2 (A)	ko04016: MAPK signaling pathway - plant; ko04626: Plant-pathogen interaction
Solyc01g016370.2	0.556667	0.173333	-1.68326	K13420 LRR receptor-like serine/threonine-protein kinase FLS2 [EC:2.7.11.1] | (RefSeq) LRR receptor-like serine/threonine-protein kinase FLS2 (A)	ko04016: MAPK signaling pathway - plant; ko04626: Plant-pathogen interaction
Solyc01g107790.2	0.706667	0.0666667	-3.40599	K13420 LRR receptor-like serine/threonine-protein kinase FLS2 [EC:2.7.11.1] | (RefSeq) LRR receptor-like serine/threonine-protein kinase FLS2 (A)	ko04016: MAPK signaling pathway - plant; ko04626: Plant-pathogen interaction
Solyc02g070910.2	1.67333	2.08667	0.318475	K13420 LRR receptor-like serine/threonine-protein kinase FLS2 [EC:2.7.11.1] | (RefSeq) LRR receptor-like serine/threonine-protein kinase FLS2 (A)	ko04016: MAPK signaling pathway - plant; ko04626: Plant-pathogen interaction
Solyc02g070915.1	0.0566667	0	#NUM!	K13420 LRR receptor-like serine/threonine-protein kinase FLS2 [EC:2.7.11.1] | (RefSeq) LRR receptor-like serine/threonine-protein kinase FLS2 (A)	ko04016: MAPK signaling pathway - plant; ko04626: Plant-pathogen interaction
Solyc02g070920.3	0.74	0.786667	0.0882272	K13420 LRR receptor-like serine/threonine-protein kinase FLS2 [EC:2.7.11.1] | (RefSeq) LRR receptor-like serine/threonine-protein kinase FLS2 (A)	ko04016: MAPK signaling pathway - plant; ko04626: Plant-pathogen interaction
Solyc02g084600.3	0.0666667	0.176667	1.40599	K13420 LRR receptor-like serine/threonine-protein kinase FLS2 [EC:2.7.11.1] | (RefSeq) LRR receptor-like serine/threonine-protein kinase FLS2 (A)	ko04016: MAPK signaling pathway - plant; ko04626: Plant-pathogen interaction
Solyc04g054200.3	5.93333	5.44333	-0.124352	K13420 LRR receptor-like serine/threonine-protein kinase FLS2 [EC:2.7.11.1] | (RefSeq) LRR receptor-like serine/threonine-protein kinase FLS2 (A)	ko04016: MAPK signaling pathway - plant; ko04626: Plant-pathogen interaction
Solyc04g074000.3	101.683	90.7567	-0.164008	K13420 LRR receptor-like serine/threonine-protein kinase FLS2 [EC:2.7.11.1] | (RefSeq) LRR receptor-like serine/threonine-protein kinase FLS2 (A)	ko04016: MAPK signaling pathway - plant; ko04626: Plant-pathogen interaction
Solyc07g005010.3	4.79667	4.05333	-0.242923	K13420 LRR receptor-like serine/threonine-protein kinase FLS2 [EC:2.7.11.1] | (RefSeq) LRR receptor-like serine/threonine-protein kinase FLS2 (A)	ko04016: MAPK signaling pathway - plant; ko04626: Plant-pathogen interaction
Solyc08g080830.3	23.6767	23.2333	-0.0272698	K13420 LRR receptor-like serine/threonine-protein kinase FLS2 [EC:2.7.11.1] | (RefSeq) LRR receptor-like serine/threonine-protein kinase FLS2 (A)	ko04016: MAPK signaling pathway - plant; ko04626: Plant-pathogen interaction
Solyc02g072440.3	0.213333	0.31	0.539159	K13420 LRR receptor-like serine/threonine-protein kinase FLS2 [EC:2.7.11.1] | (RefSeq) LRR receptor-like serine/threonine-protein kinase GSO1 isoform X1 (A)	ko04016: MAPK signaling pathway - plant; ko04626: Plant-pathogen interaction
Solyc02g072447.1	9.85667	9.4	-0.0684391	K13420 LRR receptor-like serine/threonine-protein kinase FLS2 [EC:2.7.11.1] | (RefSeq) LRR receptor-like serine/threonine-protein kinase GSO1 isoform X1 (A)	ko04016: MAPK signaling pathway - plant; ko04626: Plant-pathogen interaction
Solyc03g019980.2	0.01	0	#NUM!	K13420 LRR receptor-like serine/threonine-protein kinase FLS2 [EC:2.7.11.1] | (RefSeq) LRR receptor-like serine/threonine-protein kinase GSO1 isoform X1 (A)	ko04016: MAPK signaling pathway - plant; ko04626: Plant-pathogen interaction
Solyc03g096190.2	0.0733333	0.0333333	-1.1375	K13420 LRR receptor-like serine/threonine-protein kinase FLS2 [EC:2.7.11.1] | (RefSeq) LRR receptor-like serine/threonine-protein kinase GSO1 isoform X1 (A)	ko04016: MAPK signaling pathway - plant; ko04626: Plant-pathogen interaction
Solyc03g098400.2	0.706667	0.793333	0.166897	K13420 LRR receptor-like serine/threonine-protein kinase FLS2 [EC:2.7.11.1] | (RefSeq) LRR receptor-like serine/threonine-protein kinase GSO1 isoform X1 (A)	ko04016: MAPK signaling pathway - plant; ko04626: Plant-pathogen interaction
Solyc03g118330.2	0.803333	1.58667	0.981928	K13420 LRR receptor-like serine/threonine-protein kinase FLS2 [EC:2.7.11.1] | (RefSeq) LRR receptor-like serine/threonine-protein kinase GSO1 isoform X1 (A)	ko04016: MAPK signaling pathway - plant; ko04626: Plant-pathogen interaction
Solyc07g018180.2	1.54	1.94667	0.338076	K13420 LRR receptor-like serine/threonine-protein kinase FLS2 [EC:2.7.11.1] | (RefSeq) LRR receptor-like serine/threonine-protein kinase GSO1 isoform X1 (A)	ko04016: MAPK signaling pathway - plant; ko04626: Plant-pathogen interaction
Solyc07g018190.3	0.956667	1.55667	0.702372	K13420 LRR receptor-like serine/threonine-protein kinase FLS2 [EC:2.7.11.1] | (RefSeq) LRR receptor-like serine/threonine-protein kinase GSO1 isoform X1 (A)	ko04016: MAPK signaling pathway - plant; ko04626: Plant-pathogen interaction
Solyc10g085120.2	0.383333	0.94	1.29406	K13420 LRR receptor-like serine/threonine-protein kinase FLS2 [EC:2.7.11.1] | (RefSeq) LRR receptor-like serine/threonine-protein kinase GSO1 isoform X1 (A)	ko04016: MAPK signaling pathway - plant; ko04626: Plant-pathogen interaction
Solyc02g063210.1	0.0866667	0.123333	0.509014	K13420 LRR receptor-like serine/threonine-protein kinase FLS2 [EC:2.7.11.1] | (RefSeq) probable LRR receptor-like serine/threonine-protein kinase At3g47570 (A)	ko04016: MAPK signaling pathway - plant; ko04626: Plant-pathogen interaction
Solyc02g068845.1	0.623333	0.816667	0.389743	K13420 LRR receptor-like serine/threonine-protein kinase FLS2 [EC:2.7.11.1] | (RefSeq) probable LRR receptor-like serine/threonine-protein kinase At3g47570 (A)	ko04016: MAPK signaling pathway - plant; ko04626: Plant-pathogen interaction
Solyc02g072393.1	0.01	0.00333333	-1.58496	K13420 LRR receptor-like serine/threonine-protein kinase FLS2 [EC:2.7.11.1] | (RefSeq) probable LRR receptor-like serine/threonine-protein kinase At3g47570 (A)	ko04016: MAPK signaling pathway - plant; ko04626: Plant-pathogen interaction
Solyc02g072470.3	1.06	1.39	0.391021	K13420 LRR receptor-like serine/threonine-protein kinase FLS2 [EC:2.7.11.1] | (RefSeq) probable LRR receptor-like serine/threonine-protein kinase At3g47570 (A)	ko04016: MAPK signaling pathway - plant; ko04626: Plant-pathogen interaction
Solyc03g006030.3	33.98	33.9333	-0.0019827	K13420 LRR receptor-like serine/threonine-protein kinase FLS2 [EC:2.7.11.1] | (RefSeq) probable LRR receptor-like serine/threonine-protein kinase At3g47570 (A)	ko04016: MAPK signaling pathway - plant; ko04626: Plant-pathogen interaction
Solyc03g006080.3	3.1	3.98	0.3605	K13420 LRR receptor-like serine/threonine-protein kinase FLS2 [EC:2.7.11.1] | (RefSeq) probable LRR receptor-like serine/threonine-protein kinase At3g47570 (A)	ko04016: MAPK signaling pathway - plant; ko04626: Plant-pathogen interaction
Solyc04g009040.3	0.103333	0.406667	1.97654	K13420 LRR receptor-like serine/threonine-protein kinase FLS2 [EC:2.7.11.1] | (RefSeq) probable LRR receptor-like serine/threonine-protein kinase At3g47570 (A)	ko04016: MAPK signaling pathway - plant; ko04626: Plant-pathogen interaction
Solyc06g043275.1	0.256667	0.183333	-0.485427	K13420 LRR receptor-like serine/threonine-protein kinase FLS2 [EC:2.7.11.1] | (RefSeq) probable LRR receptor-like serine/threonine-protein kinase At3g47570 (A)	ko04016: MAPK signaling pathway - plant; ko04626: Plant-pathogen interaction
Solyc10g052880.1	115.67	89.6067	-0.368337	K13420 LRR receptor-like serine/threonine-protein kinase FLS2 [EC:2.7.11.1] | (RefSeq) probable LRR receptor-like serine/threonine-protein kinase At3g47570 (A)	ko04016: MAPK signaling pathway - plant; ko04626: Plant-pathogen interaction
Solyc11g020260.2	0.1	0.103333	0.0473057	K13420 LRR receptor-like serine/threonine-protein kinase FLS2 [EC:2.7.11.1] | (RefSeq) probable LRR receptor-like serine/threonine-protein kinase At3g47570 (A)	ko04016: MAPK signaling pathway - plant; ko04626: Plant-pathogen interaction
Solyc02g063180.3	0.403333	0.416667	0.046921	K13420 LRR receptor-like serine/threonine-protein kinase FLS2 [EC:2.7.11.1] | (RefSeq) putative receptor-like protein kinase At3g47110 (A)	ko04016: MAPK signaling pathway - plant; ko04626: Plant-pathogen interaction
Solyc02g086960.2	6.64667	5.00667	-0.408781	K13420 LRR receptor-like serine/threonine-protein kinase FLS2 [EC:2.7.11.1] | (RefSeq) putative receptor-like protein kinase At3g47110 (A)	ko04016: MAPK signaling pathway - plant; ko04626: Plant-pathogen interaction
Solyc10g045610.1	0.0866667	0.0466667	-0.893085	K13420 LRR receptor-like serine/threonine-protein kinase FLS2 [EC:2.7.11.1] | (RefSeq) putative receptor-like protein kinase At3g47110 (A)	ko04016: MAPK signaling pathway - plant; ko04626: Plant-pathogen interaction
Solyc12g008400.2	1.25	1.06333	-0.233334	K13420 LRR receptor-like serine/threonine-protein kinase FLS2 [EC:2.7.11.1] | (RefSeq) putative receptor-like protein kinase At3g47110 (A)	ko04016: MAPK signaling pathway - plant; ko04626: Plant-pathogen interaction
Solyc04g009640.3	2.29667	1.3	-0.82103	K13420 LRR receptor-like serine/threonine-protein kinase FLS2 [EC:2.7.11.1] | (RefSeq) receptor kinase-like protein Xa21 (A)	ko04016: MAPK signaling pathway - plant; ko04626: Plant-pathogen interaction
Solyc04g012100.2	0.0233333	0.0333333	0.514573	K13420 LRR receptor-like serine/threonine-protein kinase FLS2 [EC:2.7.11.1] | (RefSeq) receptor kinase-like protein Xa21 (A)	ko04016: MAPK signaling pathway - plant; ko04626: Plant-pathogen interaction
Solyc04g012190.2	3.65333	4.08667	0.161711	K13420 LRR receptor-like serine/threonine-protein kinase FLS2 [EC:2.7.11.1] | (RefSeq) receptor kinase-like protein Xa21 (A)	ko04016: MAPK signaling pathway - plant; ko04626: Plant-pathogen interaction
Solyc04g014650.3	1.7	0.953333	-0.834482	K13420 LRR receptor-like serine/threonine-protein kinase FLS2 [EC:2.7.11.1] | (RefSeq) receptor kinase-like protein Xa21 (A)	ko04016: MAPK signaling pathway - plant; ko04626: Plant-pathogen interaction
Solyc04g014900.3	9.18	8.00667	-0.197292	K13420 LRR receptor-like serine/threonine-protein kinase FLS2 [EC:2.7.11.1] | (RefSeq) receptor kinase-like protein Xa21 (A)	ko04016: MAPK signaling pathway - plant; ko04626: Plant-pathogen interaction
Solyc04g015980.3	0.593333	0.83	0.484269	K13420 LRR receptor-like serine/threonine-protein kinase FLS2 [EC:2.7.11.1] | (RefSeq) receptor kinase-like protein Xa21 (A)	ko04016: MAPK signaling pathway - plant; ko04626: Plant-pathogen interaction
Solyc07g006770.2	0.89	1.04333	0.229323	K13420 LRR receptor-like serine/threonine-protein kinase FLS2 [EC:2.7.11.1] | (RefSeq) receptor kinase-like protein Xa21 (A)	ko04016: MAPK signaling pathway - plant; ko04626: Plant-pathogen interaction
Solyc00g050430.3	1.17667	1.31	0.154861	K13422 transcription factor MYC2 | (RefSeq) MYC1; transcription factor MYC1 (A)	ko04016: MAPK signaling pathway - plant; ko04075: Plant hormone signal transduction
Solyc01g096370.3	11.3233	10.5233	-0.105707	K13422 transcription factor MYC2 | (RefSeq) MYC1; transcription factor MYC1 (A)	ko04016: MAPK signaling pathway - plant; ko04075: Plant hormone signal transduction
Solyc01g106460.3	0.04	0.0333333	-0.263034	K13422 transcription factor MYC2 | (RefSeq) MYC1; transcription factor MYC1 (A)	ko04016: MAPK signaling pathway - plant; ko04075: Plant hormone signal transduction
Solyc02g063430.3	1.46	2.07333	0.505984	K13422 transcription factor MYC2 | (RefSeq) MYC1; transcription factor MYC1 (A)	ko04016: MAPK signaling pathway - plant; ko04075: Plant hormone signal transduction
Solyc02g091800.3	0.926667	0.25	-1.89012	K13422 transcription factor MYC2 | (RefSeq) MYC1; transcription factor MYC1 (A)	ko04016: MAPK signaling pathway - plant; ko04075: Plant hormone signal transduction
Solyc02g091810.2	0	0.116667	#DIV/0!	K13422 transcription factor MYC2 | (RefSeq) MYC1; transcription factor MYC1 (A)	ko04016: MAPK signaling pathway - plant; ko04075: Plant hormone signal transduction
Solyc02g091820.2	0.23	0.09	-1.35364	K13422 transcription factor MYC2 | (RefSeq) MYC1; transcription factor MYC1 (A)	ko04016: MAPK signaling pathway - plant; ko04075: Plant hormone signal transduction
Solyc03g095980.3	1.67333	3.31	0.984106	K13422 transcription factor MYC2 | (RefSeq) MYC1; transcription factor MYC1 (A)	ko04016: MAPK signaling pathway - plant; ko04075: Plant hormone signal transduction
Solyc03g118310.3	0.09	0.256667	1.5119	K13422 transcription factor MYC2 | (RefSeq) MYC1; transcription factor MYC1 (A)	ko04016: MAPK signaling pathway - plant; ko04075: Plant hormone signal transduction
Solyc05g005300.2	0.526667	0.276667	-0.928741	K13422 transcription factor MYC2 | (RefSeq) MYC1; transcription factor MYC1 (A)	ko04016: MAPK signaling pathway - plant; ko04075: Plant hormone signal transduction
Solyc05g014590.3	0.193333	0.383333	0.987509	K13422 transcription factor MYC2 | (RefSeq) MYC1; transcription factor MYC1 (A)	ko04016: MAPK signaling pathway - plant; ko04075: Plant hormone signal transduction
Solyc06g068870.3	24.0167	21.1467	-0.183606	K13422 transcription factor MYC2 | (RefSeq) MYC1; transcription factor MYC1 (A)	ko04016: MAPK signaling pathway - plant; ko04075: Plant hormone signal transduction
Solyc06g083980.2	12.8	11.5033	-0.154092	K13422 transcription factor MYC2 | (RefSeq) MYC1; transcription factor MYC1 (A)	ko04016: MAPK signaling pathway - plant; ko04075: Plant hormone signal transduction
Solyc07g018010.3	15.1867	18.5667	0.28991	K13422 transcription factor MYC2 | (RefSeq) MYC1; transcription factor MYC1 (A)	ko04016: MAPK signaling pathway - plant; ko04075: Plant hormone signal transduction
Solyc08g005050.3	39.1167	40.28	0.0422802	K13422 transcription factor MYC2 | (RefSeq) MYC1; transcription factor MYC1 (A)	ko04016: MAPK signaling pathway - plant; ko04075: Plant hormone signal transduction
Solyc08g008600.3	0.01	0	#NUM!	K13422 transcription factor MYC2 | (RefSeq) MYC1; transcription factor MYC1 (A)	ko04016: MAPK signaling pathway - plant; ko04075: Plant hormone signal transduction
Solyc08g062780.2	0.0366667	0.0266667	-0.459432	K13422 transcription factor MYC2 | (RefSeq) MYC1; transcription factor MYC1 (A)	ko04016: MAPK signaling pathway - plant; ko04075: Plant hormone signal transduction
Solyc08g081140.3	27.91	17.1267	-0.704538	K13422 transcription factor MYC2 | (RefSeq) MYC1; transcription factor MYC1 (A)	ko04016: MAPK signaling pathway - plant; ko04075: Plant hormone signal transduction
Solyc08g083170.1	0.0966667	0	#NUM!	K13422 transcription factor MYC2 | (RefSeq) MYC1; transcription factor MYC1 (A)	ko04016: MAPK signaling pathway - plant; ko04075: Plant hormone signal transduction
Solyc10g009270.3	2.49667	0.243333	-3.359	K13422 transcription factor MYC2 | (RefSeq) MYC1; transcription factor MYC1 (A)	ko04016: MAPK signaling pathway - plant; ko04075: Plant hormone signal transduction
Solyc10g009290.1	11	9.51667	-0.208975	K13422 transcription factor MYC2 | (RefSeq) MYC1; transcription factor MYC1 (A)	ko04016: MAPK signaling pathway - plant; ko04075: Plant hormone signal transduction
Solyc01g096050.3	20.4433	20.02	-0.0301885	K13422 transcription factor MYC2 | (RefSeq) MYC2; transcription factor MYC2 (A)	ko04016: MAPK signaling pathway - plant; ko04075: Plant hormone signal transduction
Solyc02g091690.3	0.36	0.193333	-0.896907	K13422 transcription factor MYC2 | (RefSeq) MYC2; transcription factor MYC2 (A)	ko04016: MAPK signaling pathway - plant; ko04075: Plant hormone signal transduction
Solyc05g050560.1	11.2933	11.1067	-0.0240455	K13422 transcription factor MYC2 | (RefSeq) MYC2; transcription factor MYC2 (A)	ko04016: MAPK signaling pathway - plant; ko04075: Plant hormone signal transduction
Solyc07g053290.3	8.19667	5.58	-0.554772	K13422 transcription factor MYC2 | (RefSeq) MYC2; transcription factor MYC2 (A)	ko04016: MAPK signaling pathway - plant; ko04075: Plant hormone signal transduction
Solyc08g076930.1	158.933	152.67	-0.0580051	K13422 transcription factor MYC2 | (RefSeq) MYC2; transcription factor MYC2 (A)	ko04016: MAPK signaling pathway - plant; ko04075: Plant hormone signal transduction
Solyc09g065100.2	4.03667	4.03333	-0.00119182	K13422 transcription factor MYC2 | (RefSeq) MYC2; transcription factor MYC2 (A)	ko04016: MAPK signaling pathway - plant; ko04075: Plant hormone signal transduction
Solyc01g089960.3	0.75	1.49	0.99035	K13424 WRKY transcription factor 33 | (RefSeq) probable WRKY transcription factor 26 (A)	ko04016: MAPK signaling pathway - plant; ko04626: Plant-pathogen interaction
Solyc02g032950.3	30.6433	18.0667	-0.762243	K13424 WRKY transcription factor 33 | (RefSeq) probable WRKY transcription factor 26 (A)	ko04016: MAPK signaling pathway - plant; ko04626: Plant-pathogen interaction
Solyc02g080890.3	32.2533	21.08	-0.613573	K13424 WRKY transcription factor 33 | (RefSeq) probable WRKY transcription factor 26 (A)	ko04016: MAPK signaling pathway - plant; ko04626: Plant-pathogen interaction
Solyc02g088345.1	10.5833	19.72	0.897865	K13424 WRKY transcription factor 33 | (RefSeq) probable WRKY transcription factor 26 (A)	ko04016: MAPK signaling pathway - plant; ko04626: Plant-pathogen interaction
Solyc03g104810.3	19.1767	17.2233	-0.154988	K13424 WRKY transcription factor 33 | (RefSeq) probable WRKY transcription factor 26 (A)	ko04016: MAPK signaling pathway - plant; ko04626: Plant-pathogen interaction
Solyc06g068460.3	241.497	271.313	0.167957	K13424 WRKY transcription factor 33 | (RefSeq) probable WRKY transcription factor 26 (A)	ko04016: MAPK signaling pathway - plant; ko04626: Plant-pathogen interaction
Solyc07g005650.3	3.54667	3.44333	-0.0426579	K13424 WRKY transcription factor 33 | (RefSeq) probable WRKY transcription factor 26 (A)	ko04016: MAPK signaling pathway - plant; ko04626: Plant-pathogen interaction
Solyc07g051840.3	14.0033	11.9367	-0.23037	K13424 WRKY transcription factor 33 | (RefSeq) probable WRKY transcription factor 26 (A)	ko04016: MAPK signaling pathway - plant; ko04626: Plant-pathogen interaction
Solyc08g062490.3	18.86	19	0.0106697	K13424 WRKY transcription factor 33 | (RefSeq) probable WRKY transcription factor 26 (A)	ko04016: MAPK signaling pathway - plant; ko04626: Plant-pathogen interaction
Solyc09g014990.3	171.703	126.833	-0.436984	K13424 WRKY transcription factor 33 | (RefSeq) probable WRKY transcription factor 26 (A)	ko04016: MAPK signaling pathway - plant; ko04626: Plant-pathogen interaction
Solyc01g079260.3	46.3733	39.5367	-0.230104	K13424 WRKY transcription factor 33 | (RefSeq) SlWRKY33A; WRKY transcription factor 33A (A)	ko04016: MAPK signaling pathway - plant; ko04626: Plant-pathogen interaction
Solyc02g071130.3	1.38333	0.383333	-1.85148	K13424 WRKY transcription factor 33 | (RefSeq) SlWRKY33A; WRKY transcription factor 33A (A)	ko04016: MAPK signaling pathway - plant; ko04626: Plant-pathogen interaction
Solyc04g051540.3	0.316667	0.803333	1.34303	K13424 WRKY transcription factor 33 | (RefSeq) SlWRKY33A; WRKY transcription factor 33A (A)	ko04016: MAPK signaling pathway - plant; ko04626: Plant-pathogen interaction
Solyc05g012500.3	3.21	4.24	0.401491	K13424 WRKY transcription factor 33 | (RefSeq) SlWRKY33A; WRKY transcription factor 33A (A)	ko04016: MAPK signaling pathway - plant; ko04626: Plant-pathogen interaction
Solyc05g053380.3	5.3	3.56667	-0.571416	K13424 WRKY transcription factor 33 | (RefSeq) SlWRKY33A; WRKY transcription factor 33A (A)	ko04016: MAPK signaling pathway - plant; ko04626: Plant-pathogen interaction
Solyc06g066360.2	0.253333	0.0733333	-1.7885	K13424 WRKY transcription factor 33 | (RefSeq) SlWRKY33A; WRKY transcription factor 33A (A)	ko04016: MAPK signaling pathway - plant; ko04626: Plant-pathogen interaction
Solyc06g066370.3	198.927	213.557	0.102382	K13424 WRKY transcription factor 33 | (RefSeq) SlWRKY33A; WRKY transcription factor 33A (A)	ko04016: MAPK signaling pathway - plant; ko04626: Plant-pathogen interaction
Solyc12g011200.2	0.0666667	0.13	0.963474	K13424 WRKY transcription factor 33 | (RefSeq) SlWRKY33A; WRKY transcription factor 33A (A)	ko04016: MAPK signaling pathway - plant; ko04626: Plant-pathogen interaction
Solyc03g095770.3	192.257	224.663	0.224731	K13425 WRKY transcription factor 22 | (RefSeq) probable WRKY transcription factor 4 (A)	ko04016: MAPK signaling pathway - plant; ko04626: Plant-pathogen interaction
Solyc01g079360.3	10.0167	10.6	0.0816618	K13425 WRKY transcription factor 22 | (RefSeq) WRKY transcription factor 22 (A)	ko04016: MAPK signaling pathway - plant; ko04626: Plant-pathogen interaction
Solyc01g095100.3	8.2	9.71667	0.244838	K13425 WRKY transcription factor 22 | (RefSeq) WRKY transcription factor 22 (A)	ko04016: MAPK signaling pathway - plant; ko04626: Plant-pathogen interaction
Solyc02g021680.3	0.04	0	#NUM!	K13425 WRKY transcription factor 22 | (RefSeq) WRKY transcription factor 22 (A)	ko04016: MAPK signaling pathway - plant; ko04626: Plant-pathogen interaction
Solyc02g072190.3	2.96667	1.91	-0.63527	K13425 WRKY transcription factor 22 | (RefSeq) WRKY transcription factor 22 (A)	ko04016: MAPK signaling pathway - plant; ko04626: Plant-pathogen interaction
Solyc02g093050.3	39.5633	28.4233	-0.477088	K13425 WRKY transcription factor 22 | (RefSeq) WRKY transcription factor 22 (A)	ko04016: MAPK signaling pathway - plant; ko04626: Plant-pathogen interaction
Solyc03g007380.2	12.73	4.48667	-1.50452	K13425 WRKY transcription factor 22 | (RefSeq) WRKY transcription factor 22 (A)	ko04016: MAPK signaling pathway - plant; ko04626: Plant-pathogen interaction
Solyc04g078550.3	143.42	130.427	-0.137007	K13425 WRKY transcription factor 22 | (RefSeq) WRKY transcription factor 22 (A)	ko04016: MAPK signaling pathway - plant; ko04626: Plant-pathogen interaction
Solyc06g008610.3	17.6633	19.14	0.115833	K13425 WRKY transcription factor 22 | (RefSeq) WRKY transcription factor 22 (A)	ko04016: MAPK signaling pathway - plant; ko04626: Plant-pathogen interaction
Solyc07g055280.3	5.37	6.51333	0.278474	K13425 WRKY transcription factor 22 | (RefSeq) WRKY transcription factor 22 (A)	ko04016: MAPK signaling pathway - plant; ko04626: Plant-pathogen interaction
Solyc08g006320.3	296.283	286.913	-0.0463625	K13425 WRKY transcription factor 22 | (RefSeq) WRKY transcription factor 22 (A)	ko04016: MAPK signaling pathway - plant; ko04626: Plant-pathogen interaction
Solyc08g008280.3	95.99	83.1233	-0.207631	K13425 WRKY transcription factor 22 | (RefSeq) WRKY transcription factor 22 (A)	ko04016: MAPK signaling pathway - plant; ko04626: Plant-pathogen interaction
Solyc09g066010.3	4.07333	3.90667	-0.0602717	K13425 WRKY transcription factor 22 | (RefSeq) WRKY transcription factor 22 (A)	ko04016: MAPK signaling pathway - plant; ko04626: Plant-pathogen interaction
Solyc10g009550.3	67.26	67.23	-0.000643629	K13425 WRKY transcription factor 22 | (RefSeq) WRKY transcription factor 22 (A)	ko04016: MAPK signaling pathway - plant; ko04626: Plant-pathogen interaction
Solyc12g096350.2	22.0567	15.72	-0.488614	K13425 WRKY transcription factor 22 | (RefSeq) WRKY transcription factor 22 (A)	ko04016: MAPK signaling pathway - plant; ko04626: Plant-pathogen interaction
Solyc01g095630.3	410.05	374.01	-0.132723	K13425 WRKY transcription factor 22 | (RefSeq) WRKY transcription factor 22-like (A)	ko04016: MAPK signaling pathway - plant; ko04626: Plant-pathogen interaction
Solyc03g082820.3	2.57667	2.01333	-0.35592	K13425 WRKY transcription factor 22 | (RefSeq) WRKY transcription factor 22-like (A)	ko04016: MAPK signaling pathway - plant; ko04626: Plant-pathogen interaction
Solyc08g082110.3	27.6267	17.23	-0.681139	K13425 WRKY transcription factor 22 | (RefSeq) WRKY transcription factor 22-like (A)	ko04016: MAPK signaling pathway - plant; ko04626: Plant-pathogen interaction
Solyc10g011910.3	45.8767	47.0533	0.0365364	K13425 WRKY transcription factor 22 | (RefSeq) WRKY transcription factor 22-like (A)	ko04016: MAPK signaling pathway - plant; ko04626: Plant-pathogen interaction
Solyc08g081610.3	0.426667	2.08	2.2854	K13426 WRKY transcription factor 29 | (RefSeq) probable WRKY transcription factor 29 (A)	ko04016: MAPK signaling pathway - plant; ko04626: Plant-pathogen interaction
Solyc06g075570.2	0.11	0.0566667	-0.956931	K13447 respiratory burst oxidase [EC:1.6.3.- 1.11.1.-] | (RefSeq) RBOH1; NADPH oxidase (A)	ko04016: MAPK signaling pathway - plant; ko04626: Plant-pathogen interaction
Solyc08g081690.3	18.8767	13.47	-0.486854	K13447 respiratory burst oxidase [EC:1.6.3.- 1.11.1.-] | (RefSeq) RBOH1; NADPH oxidase (A)	ko04016: MAPK signaling pathway - plant; ko04626: Plant-pathogen interaction
Solyc11g072800.2	0.0433333	0.0333333	-0.378512	K13447 respiratory burst oxidase [EC:1.6.3.- 1.11.1.-] | (RefSeq) RBOH1; NADPH oxidase (A)	ko04016: MAPK signaling pathway - plant; ko04626: Plant-pathogen interaction
Solyc06g068690.3	0.803333	0.636667	-0.335461	K13447 respiratory burst oxidase [EC:1.6.3.- 1.11.1.-] | (RefSeq) respiratory burst oxidase homolog protein D (A)	ko04016: MAPK signaling pathway - plant; ko04626: Plant-pathogen interaction
Solyc07g042460.2	0.386667	0.246667	-0.648528	K13447 respiratory burst oxidase [EC:1.6.3.- 1.11.1.-] | (RefSeq) respiratory burst oxidase homolog protein E isoform X2 (A)	ko04016: MAPK signaling pathway - plant; ko04626: Plant-pathogen interaction
Solyc05g025680.2	0.02	0.5	4.64386	K13447 respiratory burst oxidase [EC:1.6.3.- 1.11.1.-] | (RefSeq) respiratory burst oxidase homolog protein E-like isoform X1 (A)	ko04016: MAPK signaling pathway - plant; ko04626: Plant-pathogen interaction
Solyc05g025683.1	0.116667	0.156667	0.425306	K13447 respiratory burst oxidase [EC:1.6.3.- 1.11.1.-] | (RefSeq) respiratory burst oxidase homolog protein E-like isoform X1 (A)	ko04016: MAPK signaling pathway - plant; ko04626: Plant-pathogen interaction
Solyc05g025687.1	0.0233333	0.323333	3.79256	K13447 respiratory burst oxidase [EC:1.6.3.- 1.11.1.-] | (RefSeq) respiratory burst oxidase homolog protein E-like isoform X1 (A)	ko04016: MAPK signaling pathway - plant; ko04626: Plant-pathogen interaction
Solyc03g117980.3	83.8467	78.0533	-0.103293	K13447 respiratory burst oxidase [EC:1.6.3.- 1.11.1.-] | (RefSeq) Wfi1; whitefly-induced gp91-phox (A)	ko04016: MAPK signaling pathway - plant; ko04626: Plant-pathogen interaction
Solyc00g174330.3	147.487	86.63	-0.767646	K13449 pathogenesis-related protein 1 | (RefSeq) P4; pathogenesis-related leaf protein 4 precursor (A)	ko04016: MAPK signaling pathway - plant; ko04075: Plant hormone signal transduction; ko04626: Plant-pathogen interaction
Solyc02g065470.1	30.22	29.4133	-0.0390334	K13449 pathogenesis-related protein 1 | (RefSeq) pathogenesis-related leaf protein 6 (A)	ko04016: MAPK signaling pathway - plant; ko04075: Plant hormone signal transduction; ko04626: Plant-pathogen interaction
Solyc07g006710.2	26.42	24.0867	-0.133396	K13449 pathogenesis-related protein 1 | (RefSeq) pathogenesis-related leaf protein 6 (A)	ko04016: MAPK signaling pathway - plant; ko04075: Plant hormone signal transduction; ko04626: Plant-pathogen interaction
Solyc01g106630.2	21.8733	20.97	-0.0608462	K13449 pathogenesis-related protein 1 | (RefSeq) PR1 protein precursor (A)	ko04016: MAPK signaling pathway - plant; ko04075: Plant hormone signal transduction; ko04626: Plant-pathogen interaction
Solyc10g085960.1	1.95667	1.81	-0.112408	K13449 pathogenesis-related protein 1 | (RefSeq) PR1 protein precursor (A)	ko04016: MAPK signaling pathway - plant; ko04075: Plant hormone signal transduction; ko04626: Plant-pathogen interaction
novel.413	0.543333	0	#NUM!	K13449 pathogenesis-related protein 1 | (RefSeq) PR1 protein precursor (A)	ko04016: MAPK signaling pathway - plant; ko04075: Plant hormone signal transduction; ko04626: Plant-pathogen interaction
Solyc09g007020.2	48.62	50.5933	0.0573974	K13449 pathogenesis-related protein 1 | (RefSeq) PR1a2; pathogenesis-related protein precursor (A)	ko04016: MAPK signaling pathway - plant; ko04075: Plant hormone signal transduction; ko04626: Plant-pathogen interaction
Solyc00g174340.2	4997	3250.26	-0.620508	K13449 pathogenesis-related protein 1 | (RefSeq) PR1b1; pathogenesis-related leaf protein 6 precursor (A)	ko04016: MAPK signaling pathway - plant; ko04075: Plant hormone signal transduction; ko04626: Plant-pathogen interaction
Solyc08g065410.2	0.986667	1.35	0.452325	K14496 abscisic acid receptor PYR/PYL family | (RefSeq) abscisic acid receptor PYL2-like (A)	ko04016: MAPK signaling pathway - plant; ko04075: Plant hormone signal transduction
Solyc12g095970.2	6.53333	4.39667	-0.571409	K14496 abscisic acid receptor PYR/PYL family | (RefSeq) abscisic acid receptor PYL2-like (A)	ko04016: MAPK signaling pathway - plant; ko04075: Plant hormone signal transduction
Solyc08g082180.3	27.4733	26.34	-0.0607766	K14496 abscisic acid receptor PYR/PYL family | (RefSeq) abscisic acid receptor PYL3 (A)	ko04016: MAPK signaling pathway - plant; ko04075: Plant hormone signal transduction
Solyc03g095780.2	2.44	2.65	0.119111	K14496 abscisic acid receptor PYR/PYL family | (RefSeq) abscisic acid receptor PYL4 (A)	ko04016: MAPK signaling pathway - plant; ko04075: Plant hormone signal transduction
Solyc06g050500.2	2.54667	7.37333	1.53371	K14496 abscisic acid receptor PYR/PYL family | (RefSeq) abscisic acid receptor PYL4 (A)	ko04016: MAPK signaling pathway - plant; ko04075: Plant hormone signal transduction
Solyc10g085310.1	13.79	15.9867	0.213247	K14496 abscisic acid receptor PYR/PYL family | (RefSeq) abscisic acid receptor PYL4 (A)	ko04016: MAPK signaling pathway - plant; ko04075: Plant hormone signal transduction
Solyc05g005865.1	12.56	6.22	-1.01385	K14496 abscisic acid receptor PYR/PYL family | (RefSeq) abscisic acid receptor PYL4-like (A)	ko04016: MAPK signaling pathway - plant; ko04075: Plant hormone signal transduction
Solyc09g015380.1	0.456667	0	#NUM!	K14496 abscisic acid receptor PYR/PYL family | (RefSeq) abscisic acid receptor PYL4-like (A)	ko04016: MAPK signaling pathway - plant; ko04075: Plant hormone signal transduction
Solyc10g076410.1	1.87333	2.63333	0.491283	K14496 abscisic acid receptor PYR/PYL family | (RefSeq) abscisic acid receptor PYL4-like (A)	ko04016: MAPK signaling pathway - plant; ko04075: Plant hormone signal transduction
Solyc12g055990.2	14.33	16.79	0.228564	K14496 abscisic acid receptor PYR/PYL family | (RefSeq) abscisic acid receptor PYL9 (A)	ko04016: MAPK signaling pathway - plant; ko04075: Plant hormone signal transduction
Solyc06g061180.1	51.0733	49.7367	-0.0382604	K14496 abscisic acid receptor PYR/PYL family | (RefSeq) abscisic acid receptor PYR1 (A)	ko04016: MAPK signaling pathway - plant; ko04075: Plant hormone signal transduction
Solyc08g076960.1	6.37333	8.88667	0.479594	K14496 abscisic acid receptor PYR/PYL family | (RefSeq) abscisic acid receptor PYR1 (A)	ko04016: MAPK signaling pathway - plant; ko04075: Plant hormone signal transduction
Solyc01g095700.3	20.98	18.76	-0.161355	K14496 abscisic acid receptor PYR/PYL family | (RefSeq) regulatory component of ABA receptor3-like (A)	ko04016: MAPK signaling pathway - plant; ko04075: Plant hormone signal transduction
Solyc03g121880.3	87.1833	51.6533	-0.755191	K14497 protein phosphatase 2C [EC:3.1.3.16] | (RefSeq) PP2C-1; protein phosphatase 2C ABI2 homolog (A)	ko04016: MAPK signaling pathway - plant; ko04075: Plant hormone signal transduction
Solyc03g096670.3	16.9133	6.60333	-1.35689	K14497 protein phosphatase 2C [EC:3.1.3.16] | (RefSeq) PP2C-2; protein phosphatase 2C AHG3 homolog (A)	ko04016: MAPK signaling pathway - plant; ko04075: Plant hormone signal transduction
Solyc06g076400.3	29.2467	25.2267	-0.213323	K14497 protein phosphatase 2C [EC:3.1.3.16] | (RefSeq) probable protein phosphatase 2C 24 (A)	ko04016: MAPK signaling pathway - plant; ko04075: Plant hormone signal transduction
Solyc08g062650.3	10.9667	11.1967	0.0299442	K14497 protein phosphatase 2C [EC:3.1.3.16] | (RefSeq) probable protein phosphatase 2C 6 (A)	ko04016: MAPK signaling pathway - plant; ko04075: Plant hormone signal transduction
Solyc09g065650.3	3.01333	4.23667	0.491569	K14497 protein phosphatase 2C [EC:3.1.3.16] | (RefSeq) probable protein phosphatase 2C 6 (A)	ko04016: MAPK signaling pathway - plant; ko04075: Plant hormone signal transduction
Solyc10g076320.2	0.0866667	0.00666667	-3.70044	K14497 protein phosphatase 2C [EC:3.1.3.16] | (RefSeq) probable protein phosphatase 2C 6 (A)	ko04016: MAPK signaling pathway - plant; ko04075: Plant hormone signal transduction
Solyc10g085370.2	0.0166667	0.14	3.07039	K14497 protein phosphatase 2C [EC:3.1.3.16] | (RefSeq) probable protein phosphatase 2C 6 (A)	ko04016: MAPK signaling pathway - plant; ko04075: Plant hormone signal transduction
Solyc03g006920.3	2.62333	1.86	-0.496099	K14497 protein phosphatase 2C [EC:3.1.3.16] | (RefSeq) probable protein phosphatase 2C 75 (A)	ko04016: MAPK signaling pathway - plant; ko04075: Plant hormone signal transduction
Solyc06g082700.1	0.28	0.96	1.77761	K14497 protein phosphatase 2C [EC:3.1.3.16] | (RefSeq) probable protein phosphatase 2C 75 (A)	ko04016: MAPK signaling pathway - plant; ko04075: Plant hormone signal transduction
Solyc03g006960.3	2.47667	2.80333	0.178744	K14497 protein phosphatase 2C [EC:3.1.3.16] | (RefSeq) probable protein phosphatase 2C 75 isoform X2 (A)	ko04016: MAPK signaling pathway - plant; ko04075: Plant hormone signal transduction
Solyc08g065500.2	0.0166667	0	#NUM!	K14497 protein phosphatase 2C [EC:3.1.3.16] | (RefSeq) protein phosphatase 2C (A)	ko04016: MAPK signaling pathway - plant; ko04075: Plant hormone signal transduction
Solyc08g065540.3	0.423333	0.0566667	-2.90122	K14497 protein phosphatase 2C [EC:3.1.3.16] | (RefSeq) protein phosphatase 2C (A)	ko04016: MAPK signaling pathway - plant; ko04075: Plant hormone signal transduction
Solyc05g052980.3	151.263	154.653	0.0319756	K14497 protein phosphatase 2C [EC:3.1.3.16] | (RefSeq) protein phosphatase 2C 37 (A)	ko04016: MAPK signaling pathway - plant; ko04075: Plant hormone signal transduction
Solyc10g008490.3	2.64	2.87667	0.12386	K14497 protein phosphatase 2C [EC:3.1.3.16] | (RefSeq) protein phosphatase 2C 37 (A)	ko04016: MAPK signaling pathway - plant; ko04075: Plant hormone signal transduction
Solyc07g040990.3	16.8167	12.5267	-0.424889	K14497 protein phosphatase 2C [EC:3.1.3.16] | (RefSeq) protein phosphatase 2C 50 isoform X2 (A)	ko04016: MAPK signaling pathway - plant; ko04075: Plant hormone signal transduction
Solyc03g007230.3	1.88	1.12667	-0.738672	K14497 protein phosphatase 2C [EC:3.1.3.16] | (RefSeq) protein phosphatase 2C 51-like (A)	ko04016: MAPK signaling pathway - plant; ko04075: Plant hormone signal transduction
Solyc06g084100.3	0.0166667	0.04	1.26303	K14497 protein phosphatase 2C [EC:3.1.3.16] | (RefSeq) protein phosphatase 2C 51-like (A)	ko04016: MAPK signaling pathway - plant; ko04075: Plant hormone signal transduction
Solyc07g054300.3	10.7267	14.2367	0.40841	K14497 protein phosphatase 2C [EC:3.1.3.16] | (RefSeq) protein phosphatase 2C 51-like (A)	ko04016: MAPK signaling pathway - plant; ko04075: Plant hormone signal transduction
Solyc07g066260.3	28.4233	29.0533	0.0316279	K14497 protein phosphatase 2C [EC:3.1.3.16] | (RefSeq) protein phosphatase 2C 51-like (A)	ko04016: MAPK signaling pathway - plant; ko04075: Plant hormone signal transduction
Solyc12g096020.2	63.24	53.15	-0.250768	K14497 protein phosphatase 2C [EC:3.1.3.16] | (RefSeq) protein phosphatase 2C 53 isoform X1 (A)	ko04016: MAPK signaling pathway - plant; ko04075: Plant hormone signal transduction
Solyc04g074500.3	9.50667	8.80333	-0.11089	K14498 serine/threonine-protein kinase SRK2 [EC:2.7.11.1] | (RefSeq) serine/threonine-protein kinase SAPK2 (A)	ko04016: MAPK signaling pathway - plant; ko04075: Plant hormone signal transduction
Solyc11g010130.2	6.05	9.38667	0.633678	K14498 serine/threonine-protein kinase SRK2 [EC:2.7.11.1] | (RefSeq) serine/threonine-protein kinase SAPK2 (A)	ko04016: MAPK signaling pathway - plant; ko04075: Plant hormone signal transduction
Solyc08g077780.3	30.46	22.5267	-0.435282	K14498 serine/threonine-protein kinase SRK2 [EC:2.7.11.1] | (RefSeq) serine/threonine-protein kinase SAPK3 (A)	ko04016: MAPK signaling pathway - plant; ko04075: Plant hormone signal transduction
Solyc01g103940.3	55.4967	54.1533	-0.035351	K14498 serine/threonine-protein kinase SRK2 [EC:2.7.11.1] | (RefSeq) serine/threonine-protein kinase SRK2B (A)	ko04016: MAPK signaling pathway - plant; ko04075: Plant hormone signal transduction
Solyc01g108280.3	19.8233	17.7133	-0.162364	K14498 serine/threonine-protein kinase SRK2 [EC:2.7.11.1] | (RefSeq) serine/threonine-protein kinase SRK2E (A)	ko04016: MAPK signaling pathway - plant; ko04075: Plant hormone signal transduction
Solyc02g090390.3	4.28	5.44333	0.34688	K14498 serine/threonine-protein kinase SRK2 [EC:2.7.11.1] | (RefSeq) serine/threonine-protein kinase SRK2I isoform X1 (A)	ko04016: MAPK signaling pathway - plant; ko04075: Plant hormone signal transduction
Solyc04g012160.3	41.8167	42.7733	0.0326336	K14498 serine/threonine-protein kinase SRK2 [EC:2.7.11.1] | (RefSeq) SRK2C; SNF1-related kinase (A)	ko04016: MAPK signaling pathway - plant; ko04075: Plant hormone signal transduction
Solyc12g011330.3	7.91667	6.71333	-0.237864	K14509 ethylene receptor [EC:2.7.13.-] | (RefSeq) ETR1; ethylene receptor 1 (A)	ko04016: MAPK signaling pathway - plant; ko04075: Plant hormone signal transduction
Solyc07g056580.3	6.67667	6.81	0.0285268	K14509 ethylene receptor [EC:2.7.13.-] | (RefSeq) ETR2; ethylene receptor 2 (A)	ko04016: MAPK signaling pathway - plant; ko04075: Plant hormone signal transduction
Solyc09g075440.3	14.0467	11.2667	-0.318167	K14509 ethylene receptor [EC:2.7.13.-] | (RefSeq) ETR3; ethylene receptor neverripe (A)	ko04016: MAPK signaling pathway - plant; ko04075: Plant hormone signal transduction
Solyc06g053710.3	3.46333	2.29667	-0.59262	K14509 ethylene receptor [EC:2.7.13.-] | (RefSeq) ETR4; ethylene receptor homolog precursor (A)	ko04016: MAPK signaling pathway - plant; ko04075: Plant hormone signal transduction
Solyc11g006115.1	2.60333	3.56333	0.452867	K14509 ethylene receptor [EC:2.7.13.-] | (RefSeq) ETR5; ethylene receptor homolog precursor (A)	ko04016: MAPK signaling pathway - plant; ko04075: Plant hormone signal transduction
Solyc11g006145.1	6.3	4.93333	-0.352789	K14509 ethylene receptor [EC:2.7.13.-] | (RefSeq) ETR5; ethylene receptor homolog precursor (A)	ko04016: MAPK signaling pathway - plant; ko04075: Plant hormone signal transduction
Solyc11g006170.2	4.76	5.15333	0.114544	K14509 ethylene receptor [EC:2.7.13.-] | (RefSeq) ETR5; ethylene receptor homolog precursor (A)	ko04016: MAPK signaling pathway - plant; ko04075: Plant hormone signal transduction
Solyc11g006180.2	4.77	5.37333	0.171828	K14509 ethylene receptor [EC:2.7.13.-] | (RefSeq) ETR5; ethylene receptor homolog precursor (A)	ko04016: MAPK signaling pathway - plant; ko04075: Plant hormone signal transduction
Solyc09g089610.3	0.376667	0.323333	-0.220266	K14509 ethylene receptor [EC:2.7.13.-] | (RefSeq) ETR6; ethylene receptor precursor (A)	ko04016: MAPK signaling pathway - plant; ko04075: Plant hormone signal transduction
Solyc05g055070.3	6.42667	4.86333	-0.402125	K14509 ethylene receptor [EC:2.7.13.-] | (RefSeq) protein EIN4-like (A)	ko04016: MAPK signaling pathway - plant; ko04075: Plant hormone signal transduction
Solyc01g111880.3	1.08333	1.83	0.756366	K14510 serine/threonine-protein kinase CTR1 [EC:2.7.11.1] | (RefSeq) CTR3; CTR1-like protein kinase (A)	ko04016: MAPK signaling pathway - plant; ko04075: Plant hormone signal transduction
Solyc02g031860.3	18.09	16.3533	-0.145608	K14510 serine/threonine-protein kinase CTR1 [EC:2.7.11.1] | (RefSeq) CTR3; CTR1-like protein kinase (A)	ko04016: MAPK signaling pathway - plant; ko04075: Plant hormone signal transduction
Solyc02g085620.3	0.276667	0.283333	0.0343515	K14510 serine/threonine-protein kinase CTR1 [EC:2.7.11.1] | (RefSeq) CTR3; CTR1-like protein kinase (A)	ko04016: MAPK signaling pathway - plant; ko04075: Plant hormone signal transduction
Solyc03g114210.3	6.1	6.19333	0.0219069	K14510 serine/threonine-protein kinase CTR1 [EC:2.7.11.1] | (RefSeq) CTR3; CTR1-like protein kinase (A)	ko04016: MAPK signaling pathway - plant; ko04075: Plant hormone signal transduction
Solyc03g121780.1	0.0933333	0.203333	1.12338	K14510 serine/threonine-protein kinase CTR1 [EC:2.7.11.1] | (RefSeq) CTR3; CTR1-like protein kinase (A)	ko04016: MAPK signaling pathway - plant; ko04075: Plant hormone signal transduction
Solyc04g076480.3	3.74333	3.06667	-0.287652	K14510 serine/threonine-protein kinase CTR1 [EC:2.7.11.1] | (RefSeq) CTR3; CTR1-like protein kinase (A)	ko04016: MAPK signaling pathway - plant; ko04075: Plant hormone signal transduction
Solyc07g006760.3	8.83333	5.76333	-0.616054	K14510 serine/threonine-protein kinase CTR1 [EC:2.7.11.1] | (RefSeq) CTR3; CTR1-like protein kinase (A)	ko04016: MAPK signaling pathway - plant; ko04075: Plant hormone signal transduction
Solyc07g007125.1	1.15333	0.266667	-2.1127	K14510 serine/threonine-protein kinase CTR1 [EC:2.7.11.1] | (RefSeq) CTR3; CTR1-like protein kinase (A)	ko04016: MAPK signaling pathway - plant; ko04075: Plant hormone signal transduction
Solyc07g055120.3	0.0433333	0.116667	1.42884	K14510 serine/threonine-protein kinase CTR1 [EC:2.7.11.1] | (RefSeq) CTR3; CTR1-like protein kinase (A)	ko04016: MAPK signaling pathway - plant; ko04075: Plant hormone signal transduction
Solyc07g055130.3	2.00333	2	-0.00240249	K14510 serine/threonine-protein kinase CTR1 [EC:2.7.11.1] | (RefSeq) CTR3; CTR1-like protein kinase (A)	ko04016: MAPK signaling pathway - plant; ko04075: Plant hormone signal transduction
Solyc09g009090.3	8.39667	7.28	-0.205878	K14510 serine/threonine-protein kinase CTR1 [EC:2.7.11.1] | (RefSeq) CTR3; CTR1-like protein kinase (A)	ko04016: MAPK signaling pathway - plant; ko04075: Plant hormone signal transduction
Solyc12g019410.2	1.94333	2.24667	0.209253	K14510 serine/threonine-protein kinase CTR1 [EC:2.7.11.1] | (RefSeq) CTR3; CTR1-like protein kinase (A)	ko04016: MAPK signaling pathway - plant; ko04075: Plant hormone signal transduction
Solyc12g099250.2	5.63	5.88667	0.064316	K14510 serine/threonine-protein kinase CTR1 [EC:2.7.11.1] | (RefSeq) CTR3; CTR1-like protein kinase (A)	ko04016: MAPK signaling pathway - plant; ko04075: Plant hormone signal transduction
Solyc01g095550.2	0.833333	0.37	-1.17137	K14510 serine/threonine-protein kinase CTR1 [EC:2.7.11.1] | (RefSeq) CTR4; CTR1-like protein kinase (A)	ko04016: MAPK signaling pathway - plant; ko04075: Plant hormone signal transduction
Solyc02g078140.3	14.2533	13.1433	-0.116968	K14510 serine/threonine-protein kinase CTR1 [EC:2.7.11.1] | (RefSeq) CTR4; CTR1-like protein kinase (A)	ko04016: MAPK signaling pathway - plant; ko04075: Plant hormone signal transduction
Solyc09g082470.3	21.3267	16.9567	-0.330806	K14510 serine/threonine-protein kinase CTR1 [EC:2.7.11.1] | (RefSeq) CTR4; CTR1-like protein kinase (A)	ko04016: MAPK signaling pathway - plant; ko04075: Plant hormone signal transduction
Solyc10g045270.2	3.36333	3.92667	0.223413	K14510 serine/threonine-protein kinase CTR1 [EC:2.7.11.1] | (RefSeq) CTR4; CTR1-like protein kinase (A)	ko04016: MAPK signaling pathway - plant; ko04075: Plant hormone signal transduction
Solyc10g085560.2	7.2	5.89667	-0.288097	K14510 serine/threonine-protein kinase CTR1 [EC:2.7.11.1] | (RefSeq) CTR4; CTR1-like protein kinase (A)	ko04016: MAPK signaling pathway - plant; ko04075: Plant hormone signal transduction
Solyc10g085570.2	4.09	3.52333	-0.21516	K14510 serine/threonine-protein kinase CTR1 [EC:2.7.11.1] | (RefSeq) CTR4; CTR1-like protein kinase (A)	ko04016: MAPK signaling pathway - plant; ko04075: Plant hormone signal transduction
Solyc12g013970.2	0.583333	1.33333	1.19265	K14510 serine/threonine-protein kinase CTR1 [EC:2.7.11.1] | (RefSeq) CTR4; CTR1-like protein kinase (A)	ko04016: MAPK signaling pathway - plant; ko04075: Plant hormone signal transduction
Solyc12g013990.2	4.08667	3.79667	-0.106191	K14510 serine/threonine-protein kinase CTR1 [EC:2.7.11.1] | (RefSeq) CTR4; CTR1-like protein kinase (A)	ko04016: MAPK signaling pathway - plant; ko04075: Plant hormone signal transduction
Solyc12g062280.2	18.0133	17.9667	-0.0037424	K14510 serine/threonine-protein kinase CTR1 [EC:2.7.11.1] | (RefSeq) CTR4; CTR1-like protein kinase (A)	ko04016: MAPK signaling pathway - plant; ko04075: Plant hormone signal transduction
Solyc02g031900.2	23.3	21.82	-0.0946789	K14510 serine/threonine-protein kinase CTR1 [EC:2.7.11.1] | (RefSeq) TCTR1; ethylene-inducible CTR1-like protein kinase (A)	ko04016: MAPK signaling pathway - plant; ko04075: Plant hormone signal transduction
Solyc03g006400.3	1.29667	1.46333	0.174451	K14510 serine/threonine-protein kinase CTR1 [EC:2.7.11.1] | (RefSeq) TCTR1; ethylene-inducible CTR1-like protein kinase (A)	ko04016: MAPK signaling pathway - plant; ko04075: Plant hormone signal transduction
Solyc06g007355.1	0.386667	1.53333	1.98751	K14510 serine/threonine-protein kinase CTR1 [EC:2.7.11.1] | (RefSeq) TCTR1; ethylene-inducible CTR1-like protein kinase (A)	ko04016: MAPK signaling pathway - plant; ko04075: Plant hormone signal transduction
Solyc07g007140.3	38.3433	35.9767	-0.0919142	K14510 serine/threonine-protein kinase CTR1 [EC:2.7.11.1] | (RefSeq) TCTR1; ethylene-inducible CTR1-like protein kinase (A)	ko04016: MAPK signaling pathway - plant; ko04075: Plant hormone signal transduction
Solyc09g018040.1	19.38	16.86	-0.200964	K14510 serine/threonine-protein kinase CTR1 [EC:2.7.11.1] | (RefSeq) TCTR1; ethylene-inducible CTR1-like protein kinase (A)	ko04016: MAPK signaling pathway - plant; ko04075: Plant hormone signal transduction
Solyc10g083610.2	4.37667	3.45333	-0.341843	K14510 serine/threonine-protein kinase CTR1 [EC:2.7.11.1] | (RefSeq) TCTR1; ethylene-inducible CTR1-like protein kinase (A)	ko04016: MAPK signaling pathway - plant; ko04075: Plant hormone signal transduction
Solyc08g014420.3	15.94	13.3633	-0.254372	K14512 mitogen-activated protein kinase 6 [EC:2.7.11.24] | (RefSeq) MPK2; mitogen-activated protein kinase 2 (A)	ko04016: MAPK signaling pathway - plant; ko04075: Plant hormone signal transduction; ko04626: Plant-pathogen interaction
Solyc08g014425.1	8.96667	9.15	0.0292	K14512 mitogen-activated protein kinase 6 [EC:2.7.11.24] | (RefSeq) MPK2; mitogen-activated protein kinase 2 (A)	ko04016: MAPK signaling pathway - plant; ko04075: Plant hormone signal transduction; ko04626: Plant-pathogen interaction
Solyc01g080240.3	55.0433	53.42	-0.0431879	K14512 mitogen-activated protein kinase 6 [EC:2.7.11.24] | (RefSeq) mpka1;1; Mitogen-activated protein kinase (A)	ko04016: MAPK signaling pathway - plant; ko04075: Plant hormone signal transduction; ko04626: Plant-pathogen interaction
Solyc04g007710.3	38.57	33.68	-0.195587	K14512 mitogen-activated protein kinase 6 [EC:2.7.11.24] | (RefSeq) mpka1;1; Mitogen-activated protein kinase (A)	ko04016: MAPK signaling pathway - plant; ko04075: Plant hormone signal transduction; ko04626: Plant-pathogen interaction
Solyc07g056350.3	10.0367	12.4933	0.315878	K14512 mitogen-activated protein kinase 6 [EC:2.7.11.24] | (RefSeq) mpka1;1; Mitogen-activated protein kinase (A)	ko04016: MAPK signaling pathway - plant; ko04075: Plant hormone signal transduction; ko04626: Plant-pathogen interaction
Solyc07g062080.3	19.7867	18.98	-0.0600486	K14512 mitogen-activated protein kinase 6 [EC:2.7.11.24] | (RefSeq) mpka1;1; Mitogen-activated protein kinase (A)	ko04016: MAPK signaling pathway - plant; ko04075: Plant hormone signal transduction; ko04626: Plant-pathogen interaction
Solyc12g019460.2	29.48	24.93	-0.241854	K14512 mitogen-activated protein kinase 6 [EC:2.7.11.24] | (RefSeq) mpka1;1; Mitogen-activated protein kinase (A)	ko04016: MAPK signaling pathway - plant; ko04075: Plant hormone signal transduction; ko04626: Plant-pathogen interaction
Solyc12g040680.2	28.6567	31.2933	0.126985	K14512 mitogen-activated protein kinase 6 [EC:2.7.11.24] | (RefSeq) mpka1;1; Mitogen-activated protein kinase (A)	ko04016: MAPK signaling pathway - plant; ko04075: Plant hormone signal transduction; ko04626: Plant-pathogen interaction
Solyc09g005490.1	1.17667	0.443333	-1.40824	K14513 ethylene-insensitive protein 2 | (RefSeq) EIN2; ethylene signaling protein (A)	ko04016: MAPK signaling pathway - plant; ko04075: Plant hormone signal transduction
Solyc09g005520.2	0.32	0	#NUM!	K14513 ethylene-insensitive protein 2 | (RefSeq) EIN2; ethylene signaling protein (A)	ko04016: MAPK signaling pathway - plant; ko04075: Plant hormone signal transduction
Solyc09g007870.3	18.48	16.6367	-0.151598	K14513 ethylene-insensitive protein 2 | (RefSeq) EIN2; ethylene signaling protein (A)	ko04016: MAPK signaling pathway - plant; ko04075: Plant hormone signal transduction
Solyc06g073720.2	41.4267	36.1267	-0.197496	K14514 ethylene-insensitive protein 3 | (RefSeq) EIL1; EIL1 protein (A)	ko04016: MAPK signaling pathway - plant; ko04075: Plant hormone signal transduction
Solyc01g009170.3	27.55	24.11	-0.192421	K14514 ethylene-insensitive protein 3 | (RefSeq) EIL2; EIL2 protein (A)	ko04016: MAPK signaling pathway - plant; ko04075: Plant hormone signal transduction
Solyc01g096810.3	38.4967	36.85	-0.0630689	K14514 ethylene-insensitive protein 3 | (RefSeq) EIL3; EIL3 protein (A)	ko04016: MAPK signaling pathway - plant; ko04075: Plant hormone signal transduction
Solyc06g073730.2	34.24	37.7767	0.141813	K14514 ethylene-insensitive protein 3 | (RefSeq) EIL4; EIN3-like protein (A)	ko04016: MAPK signaling pathway - plant; ko04075: Plant hormone signal transduction
Solyc01g006650.2	0.393333	0.966667	1.29727	K14514 ethylene-insensitive protein 3 | (RefSeq) ETHYLENE INSENSITIVE 3-like 3 protein isoform X1 (A)	ko04016: MAPK signaling pathway - plant; ko04075: Plant hormone signal transduction
Solyc01g014480.3	6.18333	5.51667	-0.164588	K14514 ethylene-insensitive protein 3 | (RefSeq) ETHYLENE INSENSITIVE 3-like 3 protein isoform X1 (A)	ko04016: MAPK signaling pathway - plant; ko04075: Plant hormone signal transduction
Solyc12g009560.2	18.4933	21.52	0.218673	K14515 EIN3-binding F-box protein | (RefSeq) EBF1; EIN3-binding F-box protein 1 (A)	ko04016: MAPK signaling pathway - plant; ko04075: Plant hormone signal transduction
Solyc08g060810.3	26.1267	26.2967	0.00935686	K14515 EIN3-binding F-box protein | (RefSeq) EBF2; EIN3-binding F-box protein 2 (A)	ko04016: MAPK signaling pathway - plant; ko04075: Plant hormone signal transduction
Solyc07g008250.3	16.0367	14.44	-0.151304	K14515 EIN3-binding F-box protein | (RefSeq) EIN3-binding F-box protein 1 (A)	ko04016: MAPK signaling pathway - plant; ko04075: Plant hormone signal transduction
Solyc01g010500.2	0.186667	0	#NUM!	K14515 EIN3-binding F-box protein | (RefSeq) EIN3-binding F-box protein 1-like (A)	ko04016: MAPK signaling pathway - plant; ko04075: Plant hormone signal transduction
Solyc02g077360.1	0	0.0466667	#DIV/0!	K14516 ethylene-responsive transcription factor 1 | (RefSeq) EREB; ethylene responsive element binding protein (A)	ko04016: MAPK signaling pathway - plant; ko04075: Plant hormone signal transduction
Solyc09g089930.2	9.33	11.39	0.287819	K14516 ethylene-responsive transcription factor 1 | (RefSeq) EREB; ethylene responsive element binding protein (A)	ko04016: MAPK signaling pathway - plant; ko04075: Plant hormone signal transduction
Solyc05g051200.1	2.31	2.37667	0.0410467	K14516 ethylene-responsive transcription factor 1 | (RefSeq) ERF1; ethylene-responsive transcription factor 1 (A)	ko04016: MAPK signaling pathway - plant; ko04075: Plant hormone signal transduction
Solyc03g005500.1	0.573333	0	#NUM!	K14516 ethylene-responsive transcription factor 1 | (RefSeq) ethylene-responsive transcription factor 1B (A)	ko04016: MAPK signaling pathway - plant; ko04075: Plant hormone signal transduction
Solyc04g014530.1	7.51	6.31667	-0.249649	K14516 ethylene-responsive transcription factor 1 | (RefSeq) ethylene-responsive transcription factor 1B (A)	ko04016: MAPK signaling pathway - plant; ko04075: Plant hormone signal transduction
Solyc09g066360.1	0.0766667	0.06	-0.353637	K14516 ethylene-responsive transcription factor 1 | (RefSeq) ethylene-responsive transcription factor 1B (A)	ko04016: MAPK signaling pathway - plant; ko04075: Plant hormone signal transduction
Solyc11g011750.2	6.27667	7.55	0.266478	K14516 ethylene-responsive transcription factor 1 | (RefSeq) ethylene-responsive transcription factor 1B (A)	ko04016: MAPK signaling pathway - plant; ko04075: Plant hormone signal transduction
Solyc11g062120.2	17.09	14.2133	-0.265907	K17686 P-type Cu+ transporter [EC:7.2.2.8] | (RefSeq) copper-transporting ATPase HMA4-like (A)	ko04016: MAPK signaling pathway - plant
Solyc01g105160.3	8.2	9.14333	0.157096	K17686 P-type Cu+ transporter [EC:7.2.2.8] | (RefSeq) copper-transporting ATPase PAA1, chloroplastic isoform X1 (A)	ko04016: MAPK signaling pathway - plant
Solyc01g105165.1	77.0733	71.8533	-0.101177	K17686 P-type Cu+ transporter [EC:7.2.2.8] | (RefSeq) copper-transporting ATPase PAA1, chloroplastic isoform X1 (A)	ko04016: MAPK signaling pathway - plant
Solyc08g061570.2	0.376667	0.813333	1.11056	K17686 P-type Cu+ transporter [EC:7.2.2.8] | (RefSeq) copper-transporting ATPase PAA2, chloroplastic (A)	ko04016: MAPK signaling pathway - plant
Solyc08g061580.3	0.84	0.37	-1.18286	K17686 P-type Cu+ transporter [EC:7.2.2.8] | (RefSeq) copper-transporting ATPase PAA2, chloroplastic (A)	ko04016: MAPK signaling pathway - plant
Solyc08g061610.3	12.4267	13.3933	0.108076	K17686 P-type Cu+ transporter [EC:7.2.2.8] | (RefSeq) copper-transporting ATPase PAA2, chloroplastic (A)	ko04016: MAPK signaling pathway - plant
Solyc02g068490.3	19.6933	15.6633	-0.330316	K17686 P-type Cu+ transporter [EC:7.2.2.8] | (RefSeq) copper-transporting ATPase RAN1 (A)	ko04016: MAPK signaling pathway - plant
Solyc08g080890.3	0.84	0.95	0.177538	K17686 P-type Cu+ transporter [EC:7.2.2.8] | (RefSeq) LOW QUALITY PROTEIN: probable copper-transporting ATPase HMA5 (A)	ko04016: MAPK signaling pathway - plant
Solyc04g080730.3	20.7233	23.7967	0.199503	K20535 mitogen-activated protein kinase 1/2 [EC:2.7.11.24] | (RefSeq) MPK9; mitogen-activated protein kinase 9 (A)	ko04016: MAPK signaling pathway - plant
Solyc06g005170.3	307.93	278.58	-0.144511	K20536 mitogen-activated protein kinase 3 [EC:2.7.11.24] | (RefSeq) MPK3; mitogen-activated protein kinase 3 (A)	ko04016: MAPK signaling pathway - plant; ko04626: Plant-pathogen interaction
Solyc02g084870.3	6.92667	5.30333	-0.385262	K20537 mitogen-activated protein kinase 7/14 [EC:2.7.11.24] | (RefSeq) MAPK8; mitogen-activated protein kinase 8 (A)	ko04016: MAPK signaling pathway - plant
Solyc10g007505.1	26.05	23.91	-0.123669	K20537 mitogen-activated protein kinase 7/14 [EC:2.7.11.24] | (RefSeq) MAPK8; mitogen-activated protein kinase 8 (A)	ko04016: MAPK signaling pathway - plant
Solyc02g061770.3	11.34	3.61667	-1.64869	K20547 basic endochitinase B [EC:3.2.1.14] | (RefSeq) CHI14; basic endochitinase precursor (A)	ko00520: Amino sugar and nucleotide sugar metabolism; ko01100: Metabolic pathways; ko04016: MAPK signaling pathway - plant
Solyc02g082950.3	1.25333	0.55	-1.18827	K20547 basic endochitinase B [EC:3.2.1.14] | (RefSeq) CHI14; basic endochitinase precursor (A)	ko00520: Amino sugar and nucleotide sugar metabolism; ko01100: Metabolic pathways; ko04016: MAPK signaling pathway - plant
Solyc09g098530.3	14.6	12.08	-0.273348	K20547 basic endochitinase B [EC:3.2.1.14] | (RefSeq) CHI14; basic endochitinase precursor (A)	ko00520: Amino sugar and nucleotide sugar metabolism; ko01100: Metabolic pathways; ko04016: MAPK signaling pathway - plant
Solyc09g098540.3	39.29	38.75	-0.0199659	K20547 basic endochitinase B [EC:3.2.1.14] | (RefSeq) CHI14; basic endochitinase precursor (A)	ko00520: Amino sugar and nucleotide sugar metabolism; ko01100: Metabolic pathways; ko04016: MAPK signaling pathway - plant
Solyc12g098810.2	3.56	4.73667	0.411995	K20547 basic endochitinase B [EC:3.2.1.14] | (RefSeq) CHI14; basic endochitinase precursor (A)	ko00520: Amino sugar and nucleotide sugar metabolism; ko01100: Metabolic pathways; ko04016: MAPK signaling pathway - plant
Solyc02g082930.3	71.48	29.82	-1.26126	K20547 basic endochitinase B [EC:3.2.1.14] | (RefSeq) CHI17; acidic 27 kDa endochitinase precursor (A)	ko00520: Amino sugar and nucleotide sugar metabolism; ko01100: Metabolic pathways; ko04016: MAPK signaling pathway - plant
Solyc02g082920.3	1665.8	936.23	-0.831283	K20547 basic endochitinase B [EC:3.2.1.14] | (RefSeq) CHI3; acidic 26 kDa endochitinase precursor (A)	ko00520: Amino sugar and nucleotide sugar metabolism; ko01100: Metabolic pathways; ko04016: MAPK signaling pathway - plant
Solyc01g097270.3	138.357	90.3	-0.615594	K20547 basic endochitinase B [EC:3.2.1.14] | (RefSeq) CHI9; basic 30 kDa endochitinase precursor (A)	ko00520: Amino sugar and nucleotide sugar metabolism; ko01100: Metabolic pathways; ko04016: MAPK signaling pathway - plant
Solyc03g116225.1	0.143333	0	#NUM!	K20547 basic endochitinase B [EC:3.2.1.14] | (RefSeq) CHI9; basic 30 kDa endochitinase precursor (A)	ko00520: Amino sugar and nucleotide sugar metabolism; ko01100: Metabolic pathways; ko04016: MAPK signaling pathway - plant
Solyc10g017970.1	0.413333	0	#NUM!	K20547 basic endochitinase B [EC:3.2.1.14] | (RefSeq) CHI9; basic 30 kDa endochitinase precursor (A)	ko00520: Amino sugar and nucleotide sugar metabolism; ko01100: Metabolic pathways; ko04016: MAPK signaling pathway - plant
Solyc10g055810.2	624.177	392.21	-0.670328	K20547 basic endochitinase B [EC:3.2.1.14] | (RefSeq) CHI9; basic 30 kDa endochitinase precursor (A)	ko00520: Amino sugar and nucleotide sugar metabolism; ko01100: Metabolic pathways; ko04016: MAPK signaling pathway - plant
Solyc10g074440.2	4.67333	5.01	0.100359	K20547 basic endochitinase B [EC:3.2.1.14] | (RefSeq) endochitinase (A)	ko00520: Amino sugar and nucleotide sugar metabolism; ko01100: Metabolic pathways; ko04016: MAPK signaling pathway - plant
Solyc10g055820.2	0.883333	0.346667	-1.34941	K20547 basic endochitinase B [EC:3.2.1.14] | (RefSeq) endochitinase 3-like (A)	ko00520: Amino sugar and nucleotide sugar metabolism; ko01100: Metabolic pathways; ko04016: MAPK signaling pathway - plant
Solyc07g009500.2	2.33	0.106667	-4.44915	K20547 basic endochitinase B [EC:3.2.1.14] | (RefSeq) endochitinase 4 (A)	ko00520: Amino sugar and nucleotide sugar metabolism; ko01100: Metabolic pathways; ko04016: MAPK signaling pathway - plant
Solyc10g055780.1	0.506667	1.82667	1.8501	K20547 basic endochitinase B [EC:3.2.1.14] | (RefSeq) endochitinase 4 (A)	ko00520: Amino sugar and nucleotide sugar metabolism; ko01100: Metabolic pathways; ko04016: MAPK signaling pathway - plant
Solyc10g055790.1	0.07	0.323333	2.2076	K20547 basic endochitinase B [EC:3.2.1.14] | (RefSeq) endochitinase 4 (A)	ko00520: Amino sugar and nucleotide sugar metabolism; ko01100: Metabolic pathways; ko04016: MAPK signaling pathway - plant
Solyc10g055800.2	123.303	79.1667	-0.639247	K20547 basic endochitinase B [EC:3.2.1.14] | (RefSeq) endochitinase 4 (A)	ko00520: Amino sugar and nucleotide sugar metabolism; ko01100: Metabolic pathways; ko04016: MAPK signaling pathway - plant
Solyc04g049010.3	5.71	5.47	-0.0619499	K20553 5'-3' exoribonuclease 4 [EC:3.1.13.-] | (RefSeq) XRN4; ethylene insensitive 5/7 (A)	ko04016: MAPK signaling pathway - plant
Solyc04g081280.3	6.97667	6.56667	-0.0873767	K20553 5'-3' exoribonuclease 4 [EC:3.1.13.-] | (RefSeq) XRN4; ethylene insensitive 5/7 (A)	ko04016: MAPK signaling pathway - plant
Solyc12g089280.2	8.59333	6.65	-0.369864	K20553 5'-3' exoribonuclease 4 [EC:3.1.13.-] | (RefSeq) XRN4; ethylene insensitive 5/7 (A)	ko04016: MAPK signaling pathway - plant
Solyc01g110480.3	110.253	96.5833	-0.190976	K20557 transcription factor VIP1 | (RefSeq) transcription factor VIP1 (A)	ko04016: MAPK signaling pathway - plant
Solyc04g071160.3	14.1	11.1333	-0.34081	K20557 transcription factor VIP1 | (RefSeq) transcription factor VIP1 (A)	ko04016: MAPK signaling pathway - plant
Solyc04g081190.3	5.64	5.67	0.00765357	K20557 transcription factor VIP1 | (RefSeq) transcription factor VIP1 (A)	ko04016: MAPK signaling pathway - plant
Solyc06g048630.3	16.2133	18.08	0.157214	K20557 transcription factor VIP1 | (RefSeq) transcription factor VIP1 (A)	ko04016: MAPK signaling pathway - plant
Solyc06g049040.3	6	6.50667	0.116956	K20557 transcription factor VIP1 | (RefSeq) transcription factor VIP1 (A)	ko04016: MAPK signaling pathway - plant
Solyc06g060490.3	34.01	31.33	-0.118414	K20557 transcription factor VIP1 | (RefSeq) transcription factor VIP1 (A)	ko04016: MAPK signaling pathway - plant
Solyc07g053450.3	0.26	0.44	0.758992	K20557 transcription factor VIP1 | (RefSeq) transcription factor VIP1 (A)	ko04016: MAPK signaling pathway - plant
Solyc07g062713.1	0.0333333	0	#NUM!	K20557 transcription factor VIP1 | (RefSeq) transcription factor VIP1 (A)	ko04016: MAPK signaling pathway - plant
Solyc12g010800.2	2.52667	3.17667	0.330278	K20557 transcription factor VIP1 | (RefSeq) transcription factor VIP1 (A)	ko04016: MAPK signaling pathway - plant
Solyc01g080050.3	0.113333	0.136667	0.270089	K20558 transcription factor SPEECHLESS | (RefSeq) transcription factor SPEECHLESS (A)	ko04016: MAPK signaling pathway - plant
Solyc01g098720.3	0.2	0	#NUM!	K20558 transcription factor SPEECHLESS | (RefSeq) transcription factor SPEECHLESS (A)	ko04016: MAPK signaling pathway - plant
Solyc03g007410.3	0.92	1.53333	0.736966	K20558 transcription factor SPEECHLESS | (RefSeq) transcription factor SPEECHLESS (A)	ko04016: MAPK signaling pathway - plant
Solyc04g074810.3	0.256667	0.343333	0.419714	K20558 transcription factor SPEECHLESS | (RefSeq) transcription factor SPEECHLESS (A)	ko04016: MAPK signaling pathway - plant
Solyc05g053660.2	9.03	5.75667	-0.649492	K20558 transcription factor SPEECHLESS | (RefSeq) transcription factor SPEECHLESS (A)	ko04016: MAPK signaling pathway - plant
Solyc09g091760.2	1.98	1.69333	-0.225634	K20558 transcription factor SPEECHLESS | (RefSeq) transcription factor SPEECHLESS (A)	ko04016: MAPK signaling pathway - plant
Solyc11g010340.2	0.26	0.14	-0.893085	K20558 transcription factor SPEECHLESS | (RefSeq) transcription factor SPEECHLESS (A)	ko04016: MAPK signaling pathway - plant
Solyc12g087855.1	0.0166667	0.116667	2.80735	K20558 transcription factor SPEECHLESS | (RefSeq) transcription factor SPEECHLESS (A)	ko04016: MAPK signaling pathway - plant
Solyc01g094960.3	5.69667	5.95333	0.0635797	K20600 mitogen-activated protein kinase 4 [EC:2.7.11.24] | (RefSeq) MAPK5; mitogen-activated protein kinase 5 (A)	ko04016: MAPK signaling pathway - plant; ko04626: Plant-pathogen interaction
Solyc01g094965.1	0.363333	0.32	-0.183222	K20600 mitogen-activated protein kinase 4 [EC:2.7.11.24] | (RefSeq) MAPK5; mitogen-activated protein kinase 5 (A)	ko04016: MAPK signaling pathway - plant; ko04626: Plant-pathogen interaction
Solyc10g007500.3	40.06	41.6833	0.0573082	K20600 mitogen-activated protein kinase 4 [EC:2.7.11.24] | (RefSeq) MAPK5; mitogen-activated protein kinase 5 (A)	ko04016: MAPK signaling pathway - plant; ko04626: Plant-pathogen interaction
Solyc05g049970.3	20.7233	18.07	-0.19766	K20600 mitogen-activated protein kinase 4 [EC:2.7.11.24] | (RefSeq) MAPK6; mitogen-activated protein kinase 6 (A)	ko04016: MAPK signaling pathway - plant; ko04626: Plant-pathogen interaction
Solyc08g081495.1	10.9567	8.54	-0.359501	K20600 mitogen-activated protein kinase 4 [EC:2.7.11.24] | (RefSeq) MAPK7; mitogen-activated protein kinase 7 (A)	ko04016: MAPK signaling pathway - plant; ko04626: Plant-pathogen interaction
Solyc12g009020.2	71.6767	57.7133	-0.312599	K20603 mitogen-activated protein kinase kinase 2 [EC:2.7.12.2] | (RefSeq) mek1; MAP kinase kinase (A)	ko04016: MAPK signaling pathway - plant
Solyc03g097920.1	80.44	114.09	0.504187	K20604 mitogen-activated protein kinase kinase 9 [EC:2.7.12.2] | (RefSeq) MKK4; MAPKK (A)	ko04016: MAPK signaling pathway - plant
Solyc01g079750.3	2.24	2.51	0.164189	K20606 mitogen-activated protein kinase kinase kinase ANP1 [EC:2.7.11.25] | (RefSeq) mitogen-activated protein kinase kinase kinase NPK1 (A)	ko04016: MAPK signaling pathway - plant
Solyc01g098980.3	0.32	0.9	1.49185	K20606 mitogen-activated protein kinase kinase kinase ANP1 [EC:2.7.11.25] | (RefSeq) mitogen-activated protein kinase kinase kinase NPK1 (A)	ko04016: MAPK signaling pathway - plant
Solyc11g033270.2	8.03667	10.16	0.338231	K20606 mitogen-activated protein kinase kinase kinase ANP1 [EC:2.7.11.25] | (RefSeq) mitogen-activated protein kinase kinase kinase NPK1 (A)	ko04016: MAPK signaling pathway - plant
Solyc03g019850.3	1.92333	1.35667	-0.503543	K20607 mitogen-activated protein kinase kinase 3 [EC:2.7.12.2] | (RefSeq) mitogen-activated protein kinase kinase 3 (A)	ko04016: MAPK signaling pathway - plant
Solyc03g019873.1	1.92667	1.94667	0.0148989	K20607 mitogen-activated protein kinase kinase 3 [EC:2.7.12.2] | (RefSeq) mitogen-activated protein kinase kinase 3 (A)	ko04016: MAPK signaling pathway - plant
Solyc09g056430.3	1.91	0.753333	-1.34221	K20714 serine/threonine-protein kinase OXI1 [EC:2.7.11.1] | (RefSeq) serine/threonine-protein kinase OXI1 (A)	ko04016: MAPK signaling pathway - plant
Solyc11g061720.1	3.81	5.47333	0.522629	K20714 serine/threonine-protein kinase OXI1 [EC:2.7.11.1] | (RefSeq) serine/threonine-protein kinase OXI1 (A)	ko04016: MAPK signaling pathway - plant
Solyc03g117640.1	7.87667	6.65	-0.244231	K20716 mitogen-activated protein kinase kinase kinase 17/18 | (RefSeq) mitogen-activated protein kinase kinase kinase 17-like (A)	ko04016: MAPK signaling pathway - plant
Solyc06g065655.1	1.17333	1.83333	0.643856	K20716 mitogen-activated protein kinase kinase kinase 17/18 | (RefSeq) mitogen-activated protein kinase kinase kinase 17-like (A)	ko04016: MAPK signaling pathway - plant
Solyc06g068510.1	0.973333	1.54	0.661924	K20716 mitogen-activated protein kinase kinase kinase 17/18 | (RefSeq) mitogen-activated protein kinase kinase kinase 17-like (A)	ko04016: MAPK signaling pathway - plant
Solyc07g051920.1	0.113333	0	#NUM!	K20716 mitogen-activated protein kinase kinase kinase 17/18 | (RefSeq) mitogen-activated protein kinase kinase kinase 17-like (A)	ko04016: MAPK signaling pathway - plant
Solyc02g064980.1	31.1333	33.3733	0.100236	K20716 mitogen-activated protein kinase kinase kinase 17/18 | (RefSeq) mitogen-activated protein kinase kinase kinase 18-like (A)	ko04016: MAPK signaling pathway - plant
Solyc02g090970.1	42.56	41.5733	-0.0338397	K20716 mitogen-activated protein kinase kinase kinase 17/18 | (RefSeq) mitogen-activated protein kinase kinase kinase 18-like (A)	ko04016: MAPK signaling pathway - plant
Solyc02g090980.1	2.09333	3.51333	0.747038	K20716 mitogen-activated protein kinase kinase kinase 17/18 | (RefSeq) mitogen-activated protein kinase kinase kinase 18-like (A)	ko04016: MAPK signaling pathway - plant
Solyc02g090990.1	8.25667	4.98333	-0.728448	K20716 mitogen-activated protein kinase kinase kinase 17/18 | (RefSeq) mitogen-activated protein kinase kinase kinase 18-like (A)	ko04016: MAPK signaling pathway - plant
Solyc06g036180.3	0.186667	0.363333	0.960829	K20716 mitogen-activated protein kinase kinase kinase 17/18 | (RefSeq) mitogen-activated protein kinase kinase kinase 18-like (A)	ko04016: MAPK signaling pathway - plant
Solyc06g065790.1	0.0333333	0	#NUM!	K20716 mitogen-activated protein kinase kinase kinase 17/18 | (RefSeq) mitogen-activated protein kinase kinase kinase 18-like (A)	ko04016: MAPK signaling pathway - plant
Solyc07g051860.1	0.983333	1.03	0.0668919	K20716 mitogen-activated protein kinase kinase kinase 17/18 | (RefSeq) mitogen-activated protein kinase kinase kinase 18-like (A)	ko04016: MAPK signaling pathway - plant
Solyc07g051870.1	0.0866667	0.0533333	-0.70044	K20716 mitogen-activated protein kinase kinase kinase 17/18 | (RefSeq) mitogen-activated protein kinase kinase kinase 18-like (A)	ko04016: MAPK signaling pathway - plant
Solyc07g051880.1	0.356667	0.66	0.88789	K20716 mitogen-activated protein kinase kinase kinase 17/18 | (RefSeq) mitogen-activated protein kinase kinase kinase 18-like (A)	ko04016: MAPK signaling pathway - plant
Solyc07g051890.1	0.266667	0.126667	-1.074	K20716 mitogen-activated protein kinase kinase kinase 17/18 | (RefSeq) mitogen-activated protein kinase kinase kinase 18-like (A)	ko04016: MAPK signaling pathway - plant
Solyc07g051930.2	0.16	0.13	-0.29956	K20716 mitogen-activated protein kinase kinase kinase 17/18 | (RefSeq) mitogen-activated protein kinase kinase kinase 18-like (A)	ko04016: MAPK signaling pathway - plant
Solyc07g064820.1	21.4933	17.85	-0.267965	K20716 mitogen-activated protein kinase kinase kinase 17/18 | (RefSeq) mitogen-activated protein kinase kinase kinase 18-like (A)	ko04016: MAPK signaling pathway - plant
Solyc08g069090.1	0.0166667	0	#NUM!	K20716 mitogen-activated protein kinase kinase kinase 17/18 | (RefSeq) mitogen-activated protein kinase kinase kinase 18-like (A)	ko04016: MAPK signaling pathway - plant
Solyc06g036080.3	5.14667	5.05333	-0.026403	K20717 mitogen-activated protein kinase kinase kinase YODA [EC:2.7.11.25] | (RefSeq) mitogen-activated protein kinase kinase kinase YODA (A)	ko04016: MAPK signaling pathway - plant
Solyc08g081210.3	9.17	8.23	-0.156029	K20717 mitogen-activated protein kinase kinase kinase YODA [EC:2.7.11.25] | (RefSeq) mitogen-activated protein kinase kinase kinase YODA isoform X1 (A)	ko04016: MAPK signaling pathway - plant
Solyc03g025360.3	8.77667	9.11	0.0537779	K20717 mitogen-activated protein kinase kinase kinase YODA [EC:2.7.11.25] | (RefSeq) mitogen-activated protein kinase kinase kinase YODA-like (A)	ko04016: MAPK signaling pathway - plant
Solyc01g103530.3	4.55333	5.73333	0.332451	K20718 LRR receptor-like serine/threonine-protein kinase ERECTA [EC:2.7.11.1] | (RefSeq) LRR receptor-like serine/threonine-protein kinase ERECTA (A)	ko04016: MAPK signaling pathway - plant
Solyc02g091840.3	15.5567	17.02	0.129698	K20718 LRR receptor-like serine/threonine-protein kinase ERECTA [EC:2.7.11.1] | (RefSeq) LRR receptor-like serine/threonine-protein kinase ERECTA (A)	ko04016: MAPK signaling pathway - plant
Solyc02g091860.3	4.32333	3.92	-0.14129	K20718 LRR receptor-like serine/threonine-protein kinase ERECTA [EC:2.7.11.1] | (RefSeq) LRR receptor-like serine/threonine-protein kinase ERECTA (A)	ko04016: MAPK signaling pathway - plant
Solyc02g093100.3	7.16	8.5	0.247503	K20718 LRR receptor-like serine/threonine-protein kinase ERECTA [EC:2.7.11.1] | (RefSeq) LRR receptor-like serine/threonine-protein kinase ERECTA (A)	ko04016: MAPK signaling pathway - plant
Solyc03g019830.3	0.103333	0.01	-3.36923	K20718 LRR receptor-like serine/threonine-protein kinase ERECTA [EC:2.7.11.1] | (RefSeq) LRR receptor-like serine/threonine-protein kinase ERECTA (A)	ko04016: MAPK signaling pathway - plant
Solyc03g043770.3	1.62333	1.68333	0.0523616	K20718 LRR receptor-like serine/threonine-protein kinase ERECTA [EC:2.7.11.1] | (RefSeq) LRR receptor-like serine/threonine-protein kinase ERECTA (A)	ko04016: MAPK signaling pathway - plant
Solyc03g064010.3	2.82	3.36333	0.254197	K20718 LRR receptor-like serine/threonine-protein kinase ERECTA [EC:2.7.11.1] | (RefSeq) LRR receptor-like serine/threonine-protein kinase ERECTA (A)	ko04016: MAPK signaling pathway - plant
Solyc03g093380.2	0.253333	0.296667	0.227806	K20718 LRR receptor-like serine/threonine-protein kinase ERECTA [EC:2.7.11.1] | (RefSeq) LRR receptor-like serine/threonine-protein kinase ERECTA (A)	ko04016: MAPK signaling pathway - plant
Solyc04g050170.3	0.16	0.333333	1.05889	K20718 LRR receptor-like serine/threonine-protein kinase ERECTA [EC:2.7.11.1] | (RefSeq) LRR receptor-like serine/threonine-protein kinase ERECTA (A)	ko04016: MAPK signaling pathway - plant
Solyc04g077010.3	19.8733	16.6167	-0.258203	K20718 LRR receptor-like serine/threonine-protein kinase ERECTA [EC:2.7.11.1] | (RefSeq) LRR receptor-like serine/threonine-protein kinase ERECTA (A)	ko04016: MAPK signaling pathway - plant
Solyc05g015150.3	0.41	1.31333	1.67954	K20718 LRR receptor-like serine/threonine-protein kinase ERECTA [EC:2.7.11.1] | (RefSeq) LRR receptor-like serine/threonine-protein kinase ERECTA (A)	ko04016: MAPK signaling pathway - plant
Solyc08g061560.3	4.26667	7.18667	0.752213	K20718 LRR receptor-like serine/threonine-protein kinase ERECTA [EC:2.7.11.1] | (RefSeq) LRR receptor-like serine/threonine-protein kinase ERECTA (A)	ko04016: MAPK signaling pathway - plant
Solyc09g091260.3	1.31333	1.83333	0.481236	K20718 LRR receptor-like serine/threonine-protein kinase ERECTA [EC:2.7.11.1] | (RefSeq) LRR receptor-like serine/threonine-protein kinase ERECTA (A)	ko04016: MAPK signaling pathway - plant
Solyc12g009190.2	1.1	0.833333	-0.400538	K20718 LRR receptor-like serine/threonine-protein kinase ERECTA [EC:2.7.11.1] | (RefSeq) LRR receptor-like serine/threonine-protein kinase ERECTA (A)	ko04016: MAPK signaling pathway - plant
Solyc01g007960.3	12.0067	10.2433	-0.22915	K20718 LRR receptor-like serine/threonine-protein kinase ERECTA [EC:2.7.11.1] | (RefSeq) LRR receptor-like serine/threonine-protein kinase ERL1 (A)	ko04016: MAPK signaling pathway - plant
Solyc01g106500.3	2.41667	1.64333	-0.556393	K20718 LRR receptor-like serine/threonine-protein kinase ERECTA [EC:2.7.11.1] | (RefSeq) LRR receptor-like serine/threonine-protein kinase ERL1 (A)	ko04016: MAPK signaling pathway - plant
Solyc01g107650.3	9.74333	9.6	-0.021381	K20718 LRR receptor-like serine/threonine-protein kinase ERECTA [EC:2.7.11.1] | (RefSeq) LRR receptor-like serine/threonine-protein kinase ERL1 (A)	ko04016: MAPK signaling pathway - plant
Solyc03g007050.3	0.45	1.02	1.18057	K20718 LRR receptor-like serine/threonine-protein kinase ERECTA [EC:2.7.11.1] | (RefSeq) LRR receptor-like serine/threonine-protein kinase ERL1 (A)	ko04016: MAPK signaling pathway - plant
Solyc03g082450.3	0.41	0.526667	0.361266	K20718 LRR receptor-like serine/threonine-protein kinase ERECTA [EC:2.7.11.1] | (RefSeq) LRR receptor-like serine/threonine-protein kinase ERL1 (A)	ko04016: MAPK signaling pathway - plant
Solyc03g082470.3	1.01333	0.87	-0.220022	K20718 LRR receptor-like serine/threonine-protein kinase ERECTA [EC:2.7.11.1] | (RefSeq) LRR receptor-like serine/threonine-protein kinase ERL1 (A)	ko04016: MAPK signaling pathway - plant
Solyc03g093460.3	7.32667	8.08	0.141198	K20718 LRR receptor-like serine/threonine-protein kinase ERECTA [EC:2.7.11.1] | (RefSeq) LRR receptor-like serine/threonine-protein kinase ERL1 (A)	ko04016: MAPK signaling pathway - plant
Solyc03g112580.3	0.533333	2.32333	2.12309	K20718 LRR receptor-like serine/threonine-protein kinase ERECTA [EC:2.7.11.1] | (RefSeq) LRR receptor-like serine/threonine-protein kinase ERL1 (A)	ko04016: MAPK signaling pathway - plant
Solyc03g113450.3	1.7	2.03333	0.258312	K20718 LRR receptor-like serine/threonine-protein kinase ERECTA [EC:2.7.11.1] | (RefSeq) LRR receptor-like serine/threonine-protein kinase ERL1 (A)	ko04016: MAPK signaling pathway - plant
Solyc03g123860.3	0.573333	0.59	0.0413408	K20718 LRR receptor-like serine/threonine-protein kinase ERECTA [EC:2.7.11.1] | (RefSeq) LRR receptor-like serine/threonine-protein kinase ERL1 (A)	ko04016: MAPK signaling pathway - plant
Solyc04g071680.2	0.0433333	0.09	1.05445	K20718 LRR receptor-like serine/threonine-protein kinase ERECTA [EC:2.7.11.1] | (RefSeq) LRR receptor-like serine/threonine-protein kinase ERL1 (A)	ko04016: MAPK signaling pathway - plant
Solyc04g074050.3	1.68667	1.92667	0.191932	K20718 LRR receptor-like serine/threonine-protein kinase ERECTA [EC:2.7.11.1] | (RefSeq) LRR receptor-like serine/threonine-protein kinase ERL1 (A)	ko04016: MAPK signaling pathway - plant
Solyc04g076990.3	40.0767	38.4033	-0.061531	K20718 LRR receptor-like serine/threonine-protein kinase ERECTA [EC:2.7.11.1] | (RefSeq) LRR receptor-like serine/threonine-protein kinase ERL1 (A)	ko04016: MAPK signaling pathway - plant
Solyc04g081590.3	13.02	12.6367	-0.0431135	K20718 LRR receptor-like serine/threonine-protein kinase ERECTA [EC:2.7.11.1] | (RefSeq) LRR receptor-like serine/threonine-protein kinase ERL1 (A)	ko04016: MAPK signaling pathway - plant
Solyc05g007230.3	0.0366667	0.0433333	0.241008	K20718 LRR receptor-like serine/threonine-protein kinase ERECTA [EC:2.7.11.1] | (RefSeq) LRR receptor-like serine/threonine-protein kinase ERL1 (A)	ko04016: MAPK signaling pathway - plant
Solyc05g025780.3	0.01	0.06	2.58496	K20718 LRR receptor-like serine/threonine-protein kinase ERECTA [EC:2.7.11.1] | (RefSeq) LRR receptor-like serine/threonine-protein kinase ERL1 (A)	ko04016: MAPK signaling pathway - plant
Solyc07g053600.3	6.18667	3.99333	-0.631569	K20718 LRR receptor-like serine/threonine-protein kinase ERECTA [EC:2.7.11.1] | (RefSeq) LRR receptor-like serine/threonine-protein kinase ERL1 (A)	ko04016: MAPK signaling pathway - plant
Solyc07g056410.3	0.363333	0.34	-0.095759	K20718 LRR receptor-like serine/threonine-protein kinase ERECTA [EC:2.7.11.1] | (RefSeq) LRR receptor-like serine/threonine-protein kinase ERL1 (A)	ko04016: MAPK signaling pathway - plant
Solyc07g062030.3	0.823333	0.783333	-0.0718503	K20718 LRR receptor-like serine/threonine-protein kinase ERECTA [EC:2.7.11.1] | (RefSeq) LRR receptor-like serine/threonine-protein kinase ERL1 (A)	ko04016: MAPK signaling pathway - plant
Solyc07g065860.3	1.08667	2.05	0.915714	K20718 LRR receptor-like serine/threonine-protein kinase ERECTA [EC:2.7.11.1] | (RefSeq) LRR receptor-like serine/threonine-protein kinase ERL1 (A)	ko04016: MAPK signaling pathway - plant
Solyc08g066270.2	2.01	1.27	-0.662367	K20718 LRR receptor-like serine/threonine-protein kinase ERECTA [EC:2.7.11.1] | (RefSeq) LRR receptor-like serine/threonine-protein kinase ERL1 (A)	ko04016: MAPK signaling pathway - plant
Solyc08g066310.2	14.9167	12.49	-0.256152	K20718 LRR receptor-like serine/threonine-protein kinase ERECTA [EC:2.7.11.1] | (RefSeq) LRR receptor-like serine/threonine-protein kinase ERL1 (A)	ko04016: MAPK signaling pathway - plant
Solyc08g066320.3	5.92	6.96333	0.234181	K20718 LRR receptor-like serine/threonine-protein kinase ERECTA [EC:2.7.11.1] | (RefSeq) LRR receptor-like serine/threonine-protein kinase ERL1 (A)	ko04016: MAPK signaling pathway - plant
Solyc08g074760.3	35.7533	42.1	0.235742	K20718 LRR receptor-like serine/threonine-protein kinase ERECTA [EC:2.7.11.1] | (RefSeq) LRR receptor-like serine/threonine-protein kinase ERL1 (A)	ko04016: MAPK signaling pathway - plant
Solyc09g005170.2	0.13	0.223333	0.780687	K20718 LRR receptor-like serine/threonine-protein kinase ERECTA [EC:2.7.11.1] | (RefSeq) LRR receptor-like serine/threonine-protein kinase ERL1 (A)	ko04016: MAPK signaling pathway - plant
Solyc09g005190.2	0.14	0.53	1.92057	K20718 LRR receptor-like serine/threonine-protein kinase ERECTA [EC:2.7.11.1] | (RefSeq) LRR receptor-like serine/threonine-protein kinase ERL1 (A)	ko04016: MAPK signaling pathway - plant
Solyc09g007110.3	5.17667	6.31	0.285617	K20718 LRR receptor-like serine/threonine-protein kinase ERECTA [EC:2.7.11.1] | (RefSeq) LRR receptor-like serine/threonine-protein kinase ERL1 (A)	ko04016: MAPK signaling pathway - plant
Solyc09g060100.3	6.12	6.59333	0.107476	K20718 LRR receptor-like serine/threonine-protein kinase ERECTA [EC:2.7.11.1] | (RefSeq) LRR receptor-like serine/threonine-protein kinase ERL1 (A)	ko04016: MAPK signaling pathway - plant
Solyc09g064520.3	0.566667	0.753333	0.410788	K20718 LRR receptor-like serine/threonine-protein kinase ERECTA [EC:2.7.11.1] | (RefSeq) LRR receptor-like serine/threonine-protein kinase ERL1 (A)	ko04016: MAPK signaling pathway - plant
Solyc10g076550.2	57.3	55.9033	-0.0356008	K20718 LRR receptor-like serine/threonine-protein kinase ERECTA [EC:2.7.11.1] | (RefSeq) LRR receptor-like serine/threonine-protein kinase ERL1 (A)	ko04016: MAPK signaling pathway - plant
Solyc11g017280.2	3.41667	3.86667	0.178501	K20718 LRR receptor-like serine/threonine-protein kinase ERECTA [EC:2.7.11.1] | (RefSeq) LRR receptor-like serine/threonine-protein kinase ERL1 (A)	ko04016: MAPK signaling pathway - plant
Solyc11g020280.2	13.9167	12.1367	-0.197441	K20718 LRR receptor-like serine/threonine-protein kinase ERECTA [EC:2.7.11.1] | (RefSeq) LRR receptor-like serine/threonine-protein kinase ERL1 (A)	ko04016: MAPK signaling pathway - plant
Solyc12g008500.2	5.88333	4.41333	-0.414765	K20718 LRR receptor-like serine/threonine-protein kinase ERECTA [EC:2.7.11.1] | (RefSeq) LRR receptor-like serine/threonine-protein kinase ERL1 (A)	ko04016: MAPK signaling pathway - plant
novel.2727	12.71	8.16667	-0.638145	K20718 LRR receptor-like serine/threonine-protein kinase ERECTA [EC:2.7.11.1] | (RefSeq) LRR receptor-like serine/threonine-protein kinase ERL1 (A)	ko04016: MAPK signaling pathway - plant
Solyc11g005720.1	47.3933	49.66	0.0674001	K20725 MAP kinase substrate 1 | (RefSeq) protein MKS1 (A)	ko04016: MAPK signaling pathway - plant
novel.1501	1.12667	1.67	0.567787	K20725 MAP kinase substrate 1 | (RefSeq) protein MKS1 (A)	ko04016: MAPK signaling pathway - plant
Solyc06g060470.1	0.243333	0.23	-0.0813001	K20725 MAP kinase substrate 1 | (RefSeq) protein MKS1-like (A)	ko04016: MAPK signaling pathway - plant
Solyc01g104340.2	0.656667	1.28	0.962911	K20726 transmembrane protein 222 | (RefSeq) green ripe (A)	ko04016: MAPK signaling pathway - plant
Solyc08g065320.3	12.4533	7.49667	-0.732211	K20726 transmembrane protein 222 | (RefSeq) green ripe-like 1 (A)	ko04016: MAPK signaling pathway - plant
Solyc02g062420.3	6.34667	6.67	0.0716877	K20726 transmembrane protein 222 | (RefSeq) green ripe-like 2 (A)	ko04016: MAPK signaling pathway - plant
Solyc12g010720.1	3.44333	5.60333	0.702479	K20729 protein EPIDERMAL PATTERNING FACTOR 1/2 | (RefSeq) protein EPIDERMAL PATTERNING FACTOR 1 (A)	ko04016: MAPK signaling pathway - plant
Solyc04g072490.3	2.28667	2.34	0.0332625	K20729 protein EPIDERMAL PATTERNING FACTOR 1/2 | (RefSeq) transcription termination factor MTERF5, chloroplastic-like (A)	ko04016: MAPK signaling pathway - plant
Solyc04g072530.2	0.916667	0.813333	-0.17255	K20729 protein EPIDERMAL PATTERNING FACTOR 1/2 | (RefSeq) transcription termination factor MTERF5, chloroplastic-like (A)	ko04016: MAPK signaling pathway - plant
Solyc00g095860.1	1.13667	1.33333	0.230228	K20772 1-aminocyclopropane-1-carboxylate synthase 1/2/6 [EC:4.4.1.14] | (RefSeq) 1-aminocyclopropane-1-carboxylate synthase-like (A)	ko00270: Cysteine and methionine metabolism; ko01100: Metabolic pathways; ko01110: Biosynthesis of secondary metabolites; ko04016: MAPK signaling pathway - plant
Solyc08g081555.1	47.06	41.4367	-0.183593	K20772 1-aminocyclopropane-1-carboxylate synthase 1/2/6 [EC:4.4.1.14] | (RefSeq) ACS1A; 1-aminocyclopropane-1-carboxylate synthase (A)	ko00270: Cysteine and methionine metabolism; ko01100: Metabolic pathways; ko01110: Biosynthesis of secondary metabolites; ko04016: MAPK signaling pathway - plant
Solyc01g095080.3	0.426667	0.113333	-1.91254	K20772 1-aminocyclopropane-1-carboxylate synthase 1/2/6 [EC:4.4.1.14] | (RefSeq) ACS2; 1-aminocyclopropane-1-carboxylate synthase 2 (A)	ko00270: Cysteine and methionine metabolism; ko01100: Metabolic pathways; ko01110: Biosynthesis of secondary metabolites; ko04016: MAPK signaling pathway - plant
Solyc08g008087.1	250.187	233.357	-0.100468	K20772 1-aminocyclopropane-1-carboxylate synthase 1/2/6 [EC:4.4.1.14] | (RefSeq) ACS6; 1-aminocyclopropane-1-carboxylate synthase (A)	ko00270: Cysteine and methionine metabolism; ko01100: Metabolic pathways; ko01110: Biosynthesis of secondary metabolites; ko04016: MAPK signaling pathway - plant
Solyc08g081540.3	1.83	1.31667	-0.474953	K20772 1-aminocyclopropane-1-carboxylate synthase 1/2/6 [EC:4.4.1.14] | (RefSeq) LE-ACS1B; 1-aminocyclopropane-1-carboxylate synthase-like (A)	ko00270: Cysteine and methionine metabolism; ko01100: Metabolic pathways; ko01110: Biosynthesis of secondary metabolites; ko04016: MAPK signaling pathway - plant
Solyc02g083860.3	92.3867	75.5733	-0.289807	K00475 naringenin 3-dioxygenase [EC:1.14.11.9] | (RefSeq) F3H; flavanone 3-dioxygenase (A)	ko00941: Flavonoid biosynthesis; ko01100: Metabolic pathways; ko01110: Biosynthesis of secondary metabolites
Solyc05g047530.3	0.76	0.683333	-0.15341	K00487 trans-cinnamate 4-monooxygenase [EC:1.14.14.91] | (RefSeq) cytochrome P450 CYP73A100 (A)	ko00130: Ubiquinone and other terpenoid-quinone biosynthesis; ko00940: Phenylpropanoid biosynthesis; ko00941: Flavonoid biosynthesis; ko00945: Stilbenoid, diarylheptanoid and gingerol biosynthesis; ko01100: Metabolic pathways; ko01110: Biosynthesis of secondary metabolites
Solyc06g082535.1	86.7333	49.0833	-0.821353	K00487 trans-cinnamate 4-monooxygenase [EC:1.14.14.91] | (RefSeq) trans-cinnamate 4-monooxygenase (A)	ko00130: Ubiquinone and other terpenoid-quinone biosynthesis; ko00940: Phenylpropanoid biosynthesis; ko00941: Flavonoid biosynthesis; ko00945: Stilbenoid, diarylheptanoid and gingerol biosynthesis; ko01100: Metabolic pathways; ko01110: Biosynthesis of secondary metabolites
Solyc06g082530.2	25.7533	12.1433	-1.08459	K00487 trans-cinnamate 4-monooxygenase [EC:1.14.14.91] | (RefSeq) trans-cinnamate 4-monooxygenase isoform X2 (A)	ko00130: Ubiquinone and other terpenoid-quinone biosynthesis; ko00940: Phenylpropanoid biosynthesis; ko00941: Flavonoid biosynthesis; ko00945: Stilbenoid, diarylheptanoid and gingerol biosynthesis; ko01100: Metabolic pathways; ko01110: Biosynthesis of secondary metabolites
Solyc09g082660.3	89.39	80.85	-0.144866	K00588 caffeoyl-CoA O-methyltransferase [EC:2.1.1.104] | (RefSeq) AnthOMT; flavonoid 3',5'-methyltransferase (A)	ko00940: Phenylpropanoid biosynthesis; ko00941: Flavonoid biosynthesis; ko00945: Stilbenoid, diarylheptanoid and gingerol biosynthesis; ko01100: Metabolic pathways; ko01110: Biosynthesis of secondary metabolites
Solyc02g093230.3	21.64	20.0067	-0.11322	K00588 caffeoyl-CoA O-methyltransferase [EC:2.1.1.104] | (RefSeq) caffeoyl-CoA O-methyltransferase (A)	ko00940: Phenylpropanoid biosynthesis; ko00941: Flavonoid biosynthesis; ko00945: Stilbenoid, diarylheptanoid and gingerol biosynthesis; ko01100: Metabolic pathways; ko01110: Biosynthesis of secondary metabolites
Solyc02g093250.3	15.15	9.4	-0.688585	K00588 caffeoyl-CoA O-methyltransferase [EC:2.1.1.104] | (RefSeq) caffeoyl-CoA O-methyltransferase (A)	ko00940: Phenylpropanoid biosynthesis; ko00941: Flavonoid biosynthesis; ko00945: Stilbenoid, diarylheptanoid and gingerol biosynthesis; ko01100: Metabolic pathways; ko01110: Biosynthesis of secondary metabolites
Solyc02g093255.1	0.0866667	0	#NUM!	K00588 caffeoyl-CoA O-methyltransferase [EC:2.1.1.104] | (RefSeq) caffeoyl-CoA O-methyltransferase (A)	ko00940: Phenylpropanoid biosynthesis; ko00941: Flavonoid biosynthesis; ko00945: Stilbenoid, diarylheptanoid and gingerol biosynthesis; ko01100: Metabolic pathways; ko01110: Biosynthesis of secondary metabolites
Solyc08g006830.3	6.87333	7.53333	0.132278	K00588 caffeoyl-CoA O-methyltransferase [EC:2.1.1.104] | (RefSeq) caffeoyl-CoA O-methyltransferase 5 (A)	ko00940: Phenylpropanoid biosynthesis; ko00941: Flavonoid biosynthesis; ko00945: Stilbenoid, diarylheptanoid and gingerol biosynthesis; ko01100: Metabolic pathways; ko01110: Biosynthesis of secondary metabolites
Solyc10g050160.2	8.95667	6.22667	-0.524502	K00588 caffeoyl-CoA O-methyltransferase [EC:2.1.1.104] | (RefSeq) caffeoyl-CoA O-methyltransferase 5 (A)	ko00940: Phenylpropanoid biosynthesis; ko00941: Flavonoid biosynthesis; ko00945: Stilbenoid, diarylheptanoid and gingerol biosynthesis; ko01100: Metabolic pathways; ko01110: Biosynthesis of secondary metabolites
Solyc01g107910.3	37.9267	33.96	-0.159376	K00588 caffeoyl-CoA O-methyltransferase [EC:2.1.1.104] | (RefSeq) caffeoyl-CoA O-methyltransferase 6 (A)	ko00940: Phenylpropanoid biosynthesis; ko00941: Flavonoid biosynthesis; ko00945: Stilbenoid, diarylheptanoid and gingerol biosynthesis; ko01100: Metabolic pathways; ko01110: Biosynthesis of secondary metabolites
Solyc02g093270.3	78.9633	23.26	-1.76333	K00588 caffeoyl-CoA O-methyltransferase [EC:2.1.1.104] | (RefSeq) caffeoyl-CoA O-methyltransferase-like (A)	ko00940: Phenylpropanoid biosynthesis; ko00941: Flavonoid biosynthesis; ko00945: Stilbenoid, diarylheptanoid and gingerol biosynthesis; ko01100: Metabolic pathways; ko01110: Biosynthesis of secondary metabolites
Solyc03g032220.3	0.126667	0.25	0.980891	K00588 caffeoyl-CoA O-methyltransferase [EC:2.1.1.104] | (RefSeq) probable caffeoyl-CoA O-methyltransferase At4g26220 isoform X1 (A)	ko00940: Phenylpropanoid biosynthesis; ko00941: Flavonoid biosynthesis; ko00945: Stilbenoid, diarylheptanoid and gingerol biosynthesis; ko01100: Metabolic pathways; ko01110: Biosynthesis of secondary metabolites
Solyc04g063210.3	6.45667	5.12333	-0.333707	K00588 caffeoyl-CoA O-methyltransferase [EC:2.1.1.104] | (RefSeq) probable caffeoyl-CoA O-methyltransferase At4g26220 isoform X1 (A)	ko00940: Phenylpropanoid biosynthesis; ko00941: Flavonoid biosynthesis; ko00945: Stilbenoid, diarylheptanoid and gingerol biosynthesis; ko01100: Metabolic pathways; ko01110: Biosynthesis of secondary metabolites
Solyc12g098100.2	0.116667	0.0866667	-0.428843	K00660 chalcone synthase [EC:2.3.1.74] | (RefSeq) chalcone synthase J-like (A)	ko00941: Flavonoid biosynthesis; ko01100: Metabolic pathways; ko01110: Biosynthesis of secondary metabolites; ko04712: Circadian rhythm - plant
Solyc01g090600.3	0	0.01	#DIV/0!	K00660 chalcone synthase [EC:2.3.1.74] | (RefSeq) CHS1; chalcone synthase 1 (A)	ko00941: Flavonoid biosynthesis; ko01100: Metabolic pathways; ko01110: Biosynthesis of secondary metabolites; ko04712: Circadian rhythm - plant
Solyc09g091510.3	72.1933	59.24	-0.285294	K00660 chalcone synthase [EC:2.3.1.74] | (RefSeq) CHS1; chalcone synthase 1 (A)	ko00941: Flavonoid biosynthesis; ko01100: Metabolic pathways; ko01110: Biosynthesis of secondary metabolites; ko04712: Circadian rhythm - plant
Solyc01g111070.3	0.196667	0.233333	0.24664	K00660 chalcone synthase [EC:2.3.1.74] | (RefSeq) CHS2; chalcone synthase 2 (A)	ko00941: Flavonoid biosynthesis; ko01100: Metabolic pathways; ko01110: Biosynthesis of secondary metabolites; ko04712: Circadian rhythm - plant
Solyc01g111080.3	0.31	0.38	0.293731	K00660 chalcone synthase [EC:2.3.1.74] | (RefSeq) CHS2; chalcone synthase 2 (A)	ko00941: Flavonoid biosynthesis; ko01100: Metabolic pathways; ko01110: Biosynthesis of secondary metabolites; ko04712: Circadian rhythm - plant
Solyc05g053550.3	179.68	132.313	-0.441471	K00660 chalcone synthase [EC:2.3.1.74] | (RefSeq) CHS2; chalcone synthase 2 (A)	ko00941: Flavonoid biosynthesis; ko01100: Metabolic pathways; ko01110: Biosynthesis of secondary metabolites; ko04712: Circadian rhythm - plant
Solyc05g010310.3	0.113333	0	#NUM!	K01859 chalcone isomerase [EC:5.5.1.6] | (RefSeq) chalcone--flavonone isomerase (A)	ko00941: Flavonoid biosynthesis; ko01100: Metabolic pathways; ko01110: Biosynthesis of secondary metabolites
Solyc05g010320.3	52.1233	48.2233	-0.112198	K01859 chalcone isomerase [EC:5.5.1.6] | (RefSeq) CHI1; chalcone--flavonone isomerase (A)	ko00941: Flavonoid biosynthesis; ko01100: Metabolic pathways; ko01110: Biosynthesis of secondary metabolites
Solyc05g052240.3	127.347	91.35	-0.479285	K01859 chalcone isomerase [EC:5.5.1.6] | (RefSeq) probable chalcone--flavonone isomerase 3 (A)	ko00941: Flavonoid biosynthesis; ko01100: Metabolic pathways; ko01110: Biosynthesis of secondary metabolites
Solyc08g080040.3	25.1767	22.2133	-0.180661	K05277 anthocyanidin synthase [EC:1.14.20.4] | (RefSeq) leucoanthocyanidin dioxygenase isoform X1 (A)	ko00941: Flavonoid biosynthesis; ko01100: Metabolic pathways; ko01110: Biosynthesis of secondary metabolites
Solyc10g076660.2	1.22	0.81	-0.590887	K05277 anthocyanidin synthase [EC:1.14.20.4] | (RefSeq) leucoanthocyanidin dioxygenase isoform X1 (A)	ko00941: Flavonoid biosynthesis; ko01100: Metabolic pathways; ko01110: Biosynthesis of secondary metabolites
Solyc10g076670.2	0.07	0.05	-0.485427	K05277 anthocyanidin synthase [EC:1.14.20.4] | (RefSeq) leucoanthocyanidin dioxygenase isoform X1 (A)	ko00941: Flavonoid biosynthesis; ko01100: Metabolic pathways; ko01110: Biosynthesis of secondary metabolites
Solyc10g085190.2	0.16	0	#NUM!	K05277 anthocyanidin synthase [EC:1.14.20.4] | (RefSeq) leucoanthocyanidin dioxygenase isoform X1 (A)	ko00941: Flavonoid biosynthesis; ko01100: Metabolic pathways; ko01110: Biosynthesis of secondary metabolites
Solyc02g093080.3	28.7	32.77	0.191325	K05278 flavonol synthase [EC:1.14.20.6] | (RefSeq) flavonol synthase/flavanone 3-hydroxylase (A)	ko00941: Flavonoid biosynthesis; ko01100: Metabolic pathways; ko01110: Biosynthesis of secondary metabolites
Solyc06g068260.2	0	0.0166667	#DIV/0!	K05278 flavonol synthase [EC:1.14.20.6] | (RefSeq) flavonol synthase/flavanone 3-hydroxylase (A)	ko00941: Flavonoid biosynthesis; ko01100: Metabolic pathways; ko01110: Biosynthesis of secondary metabolites
Solyc06g068270.3	0.09	0.133333	0.567041	K05278 flavonol synthase [EC:1.14.20.6] | (RefSeq) flavonol synthase/flavanone 3-hydroxylase (A)	ko00941: Flavonoid biosynthesis; ko01100: Metabolic pathways; ko01110: Biosynthesis of secondary metabolites
Solyc06g069900.3	0.08	0.07	-0.192645	K05278 flavonol synthase [EC:1.14.20.6] | (RefSeq) flavonol synthase/flavanone 3-hydroxylase (A)	ko00941: Flavonoid biosynthesis; ko01100: Metabolic pathways; ko01110: Biosynthesis of secondary metabolites
Solyc10g076840.2	0.33	0.466667	0.499926	K05278 flavonol synthase [EC:1.14.20.6] | (RefSeq) flavonol synthase/flavanone 3-hydroxylase (A)	ko00941: Flavonoid biosynthesis; ko01100: Metabolic pathways; ko01110: Biosynthesis of secondary metabolites
Solyc10g076845.1	0	0.14	#DIV/0!	K05278 flavonol synthase [EC:1.14.20.6] | (RefSeq) flavonol synthase/flavanone 3-hydroxylase (A)	ko00941: Flavonoid biosynthesis; ko01100: Metabolic pathways; ko01110: Biosynthesis of secondary metabolites
Solyc10g086780.2	8.43667	6.14667	-0.456869	K05278 flavonol synthase [EC:1.14.20.6] | (RefSeq) flavonol synthase/flavanone 3-hydroxylase (A)	ko00941: Flavonoid biosynthesis; ko01100: Metabolic pathways; ko01110: Biosynthesis of secondary metabolites
Solyc11g013110.2	97.3633	72.21	-0.43118	K05278 flavonol synthase [EC:1.14.20.6] | (RefSeq) flavonol synthase/flavanone 3-hydroxylase (A)	ko00941: Flavonoid biosynthesis; ko01100: Metabolic pathways; ko01110: Biosynthesis of secondary metabolites
Solyc03g044743.1	0.0766667	0	#NUM!	K05280 flavonoid 3'-monooxygenase [EC:1.14.14.82] | (RefSeq) flavonoid 3'-monooxygenase (A)	ko00941: Flavonoid biosynthesis; ko00944: Flavone and flavonol biosynthesis; ko01100: Metabolic pathways; ko01110: Biosynthesis of secondary metabolites
Solyc03g115220.3	22.25	24.3167	0.12814	K05280 flavonoid 3'-monooxygenase [EC:1.14.14.82] | (RefSeq) flavonoid 3'-monooxygenase (A)	ko00941: Flavonoid biosynthesis; ko00944: Flavone and flavonol biosynthesis; ko01100: Metabolic pathways; ko01110: Biosynthesis of secondary metabolites
Solyc08g079280.3	33.1167	50.1667	0.599172	K05280 flavonoid 3'-monooxygenase [EC:1.14.14.82] | (RefSeq) flavonoid 3'-monooxygenase (A)	ko00941: Flavonoid biosynthesis; ko00944: Flavone and flavonol biosynthesis; ko01100: Metabolic pathways; ko01110: Biosynthesis of secondary metabolites
Solyc08g079285.1	0.103333	0.29	1.48875	K05280 flavonoid 3'-monooxygenase [EC:1.14.14.82] | (RefSeq) flavonoid 3'-monooxygenase (A)	ko00941: Flavonoid biosynthesis; ko00944: Flavone and flavonol biosynthesis; ko01100: Metabolic pathways; ko01110: Biosynthesis of secondary metabolites
Solyc08g079300.3	0.02	0	#NUM!	K05280 flavonoid 3'-monooxygenase [EC:1.14.14.82] | (RefSeq) flavonoid 3'-monooxygenase (A)	ko00941: Flavonoid biosynthesis; ko00944: Flavone and flavonol biosynthesis; ko01100: Metabolic pathways; ko01110: Biosynthesis of secondary metabolites
Solyc08g079310.3	0.913333	1.49667	0.71254	K05280 flavonoid 3'-monooxygenase [EC:1.14.14.82] | (RefSeq) flavonoid 3'-monooxygenase (A)	ko00941: Flavonoid biosynthesis; ko00944: Flavone and flavonol biosynthesis; ko01100: Metabolic pathways; ko01110: Biosynthesis of secondary metabolites
Solyc08g079330.2	0.19	0.02	-3.24793	K05280 flavonoid 3'-monooxygenase [EC:1.14.14.82] | (RefSeq) flavonoid 3'-monooxygenase (A)	ko00941: Flavonoid biosynthesis; ko00944: Flavone and flavonol biosynthesis; ko01100: Metabolic pathways; ko01110: Biosynthesis of secondary metabolites
Solyc08g079370.2	0.01	0	#NUM!	K05280 flavonoid 3'-monooxygenase [EC:1.14.14.82] | (RefSeq) flavonoid 3'-monooxygenase (A)	ko00941: Flavonoid biosynthesis; ko00944: Flavone and flavonol biosynthesis; ko01100: Metabolic pathways; ko01110: Biosynthesis of secondary metabolites
Solyc08g080380.3	0.71	0.763333	0.104494	K05280 flavonoid 3'-monooxygenase [EC:1.14.14.82] | (RefSeq) flavonoid 3'-monooxygenase (A)	ko00941: Flavonoid biosynthesis; ko00944: Flavone and flavonol biosynthesis; ko01100: Metabolic pathways; ko01110: Biosynthesis of secondary metabolites
Solyc08g083410.2	0.0333333	0.03	-0.152003	K05280 flavonoid 3'-monooxygenase [EC:1.14.14.82] | (RefSeq) flavonoid 3'-monooxygenase (A)	ko00941: Flavonoid biosynthesis; ko00944: Flavone and flavonol biosynthesis; ko01100: Metabolic pathways; ko01110: Biosynthesis of secondary metabolites
Solyc08g083500.2	0	0.04	#DIV/0!	K05280 flavonoid 3'-monooxygenase [EC:1.14.14.82] | (RefSeq) flavonoid 3'-monooxygenase (A)	ko00941: Flavonoid biosynthesis; ko00944: Flavone and flavonol biosynthesis; ko01100: Metabolic pathways; ko01110: Biosynthesis of secondary metabolites
Solyc03g031470.3	0.11	0.0833333	-0.400538	K08695 anthocyanidin reductase [EC:1.3.1.77] | (RefSeq) anthocyanidin reductase ((2S)-flavan-3-ol-forming) (A)	ko00941: Flavonoid biosynthesis; ko01100: Metabolic pathways; ko01110: Biosynthesis of secondary metabolites
Solyc04g015590.3	4.12667	3.86	-0.0963761	K08695 anthocyanidin reductase [EC:1.3.1.77] | (RefSeq) anthocyanidin reductase ((2S)-flavan-3-ol-forming) (A)	ko00941: Flavonoid biosynthesis; ko01100: Metabolic pathways; ko01110: Biosynthesis of secondary metabolites
Solyc05g051010.3	0.173333	0.353333	1.02748	K08695 anthocyanidin reductase [EC:1.3.1.77] | (RefSeq) anthocyanidin reductase ((2S)-flavan-3-ol-forming) (A)	ko00941: Flavonoid biosynthesis; ko01100: Metabolic pathways; ko01110: Biosynthesis of secondary metabolites
Solyc10g009505.1	0	0.123333	#DIV/0!	K08695 anthocyanidin reductase [EC:1.3.1.77] | (RefSeq) anthocyanidin reductase ((2S)-flavan-3-ol-forming) (A)	ko00941: Flavonoid biosynthesis; ko01100: Metabolic pathways; ko01110: Biosynthesis of secondary metabolites
Solyc10g009507.1	2.31333	2.17333	-0.0900637	K08695 anthocyanidin reductase [EC:1.3.1.77] | (RefSeq) anthocyanidin reductase ((2S)-flavan-3-ol-forming) (A)	ko00941: Flavonoid biosynthesis; ko01100: Metabolic pathways; ko01110: Biosynthesis of secondary metabolites
Solyc10g009540.1	0	0.133333	#DIV/0!	K08695 anthocyanidin reductase [EC:1.3.1.77] | (RefSeq) anthocyanidin reductase ((2S)-flavan-3-ol-forming) (A)	ko00941: Flavonoid biosynthesis; ko01100: Metabolic pathways; ko01110: Biosynthesis of secondary metabolites
Solyc10g018140.2	0.806667	1.25667	0.639557	K08695 anthocyanidin reductase [EC:1.3.1.77] | (RefSeq) anthocyanidin reductase ((2S)-flavan-3-ol-forming) (A)	ko00941: Flavonoid biosynthesis; ko01100: Metabolic pathways; ko01110: Biosynthesis of secondary metabolites
Solyc12g005350.2	0.0733333	0.226667	1.62803	K08695 anthocyanidin reductase [EC:1.3.1.77] | (RefSeq) anthocyanidin reductase ((2S)-flavan-3-ol-forming) (A)	ko00941: Flavonoid biosynthesis; ko01100: Metabolic pathways; ko01110: Biosynthesis of secondary metabolites
Solyc01g096670.3	12.9233	4.85	-1.41392	K09754 5-O-(4-coumaroyl)-D-quinate 3'-monooxygenase [EC:1.14.14.96] | (RefSeq) cytochrome P450 98A2 (A)	ko00940: Phenylpropanoid biosynthesis; ko00941: Flavonoid biosynthesis; ko00945: Stilbenoid, diarylheptanoid and gingerol biosynthesis; ko01100: Metabolic pathways; ko01110: Biosynthesis of secondary metabolites
Solyc02g064808.1	0.27	0.183333	-0.55849	K09754 5-O-(4-coumaroyl)-D-quinate 3'-monooxygenase [EC:1.14.14.96] | (RefSeq) cytochrome P450 98A2-like (A)	ko00940: Phenylpropanoid biosynthesis; ko00941: Flavonoid biosynthesis; ko00945: Stilbenoid, diarylheptanoid and gingerol biosynthesis; ko01100: Metabolic pathways; ko01110: Biosynthesis of secondary metabolites
Solyc10g078230.2	0.0166667	0.146667	3.1375	K09754 5-O-(4-coumaroyl)-D-quinate 3'-monooxygenase [EC:1.14.14.96] | (RefSeq) cytochrome P450 98A2-like (A)	ko00940: Phenylpropanoid biosynthesis; ko00941: Flavonoid biosynthesis; ko00945: Stilbenoid, diarylheptanoid and gingerol biosynthesis; ko01100: Metabolic pathways; ko01110: Biosynthesis of secondary metabolites
Solyc10g078240.2	21.66	14.5733	-0.571702	K09754 5-O-(4-coumaroyl)-D-quinate 3'-monooxygenase [EC:1.14.14.96] | (RefSeq) cytochrome P450 98A2-like (A)	ko00940: Phenylpropanoid biosynthesis; ko00941: Flavonoid biosynthesis; ko00945: Stilbenoid, diarylheptanoid and gingerol biosynthesis; ko01100: Metabolic pathways; ko01110: Biosynthesis of secondary metabolites
Solyc10g078220.2	0.93	1.08	0.215729	K09754 5-O-(4-coumaroyl)-D-quinate 3'-monooxygenase [EC:1.14.14.96] | (RefSeq) cytochrome P450 98A3 (A)	ko00940: Phenylpropanoid biosynthesis; ko00941: Flavonoid biosynthesis; ko00945: Stilbenoid, diarylheptanoid and gingerol biosynthesis; ko01100: Metabolic pathways; ko01110: Biosynthesis of secondary metabolites
Solyc12g010980.2	85.0433	76.2067	-0.158281	K13065 shikimate O-hydroxycinnamoyltransferase [EC:2.3.1.133] | (RefSeq) acetyl-CoA-benzylalcohol acetyltransferase (A)	ko00940: Phenylpropanoid biosynthesis; ko00941: Flavonoid biosynthesis; ko00945: Stilbenoid, diarylheptanoid and gingerol biosynthesis; ko01100: Metabolic pathways; ko01110: Biosynthesis of secondary metabolites
Solyc02g078510.3	1.49	0.276667	-2.42909	K13065 shikimate O-hydroxycinnamoyltransferase [EC:2.3.1.133] | (RefSeq) acylsugar acyltransferase 3-like (A)	ko00940: Phenylpropanoid biosynthesis; ko00941: Flavonoid biosynthesis; ko00945: Stilbenoid, diarylheptanoid and gingerol biosynthesis; ko01100: Metabolic pathways; ko01110: Biosynthesis of secondary metabolites
Solyc04g012020.1	0.156667	0.0266667	-2.55459	K13065 shikimate O-hydroxycinnamoyltransferase [EC:2.3.1.133] | (RefSeq) acylsugar acyltransferase 3-like (A)	ko00940: Phenylpropanoid biosynthesis; ko00941: Flavonoid biosynthesis; ko00945: Stilbenoid, diarylheptanoid and gingerol biosynthesis; ko01100: Metabolic pathways; ko01110: Biosynthesis of secondary metabolites
Solyc05g039950.2	0.29	0	#NUM!	K13065 shikimate O-hydroxycinnamoyltransferase [EC:2.3.1.133] | (RefSeq) acylsugar acyltransferase 3-like (A)	ko00940: Phenylpropanoid biosynthesis; ko00941: Flavonoid biosynthesis; ko00945: Stilbenoid, diarylheptanoid and gingerol biosynthesis; ko01100: Metabolic pathways; ko01110: Biosynthesis of secondary metabolites
Solyc07g043710.3	0.646667	0.51	-0.342525	K13065 shikimate O-hydroxycinnamoyltransferase [EC:2.3.1.133] | (RefSeq) acylsugar acyltransferase 3-like (A)	ko00940: Phenylpropanoid biosynthesis; ko00941: Flavonoid biosynthesis; ko00945: Stilbenoid, diarylheptanoid and gingerol biosynthesis; ko01100: Metabolic pathways; ko01110: Biosynthesis of secondary metabolites
Solyc08g014490.1	0.326667	0.0266667	-3.61471	K13065 shikimate O-hydroxycinnamoyltransferase [EC:2.3.1.133] | (RefSeq) acylsugar acyltransferase 3-like (A)	ko00940: Phenylpropanoid biosynthesis; ko00941: Flavonoid biosynthesis; ko00945: Stilbenoid, diarylheptanoid and gingerol biosynthesis; ko01100: Metabolic pathways; ko01110: Biosynthesis of secondary metabolites
Solyc08g075200.2	0.436667	0.233333	-0.90414	K13065 shikimate O-hydroxycinnamoyltransferase [EC:2.3.1.133] | (RefSeq) acylsugar acyltransferase 3-like (A)	ko00940: Phenylpropanoid biosynthesis; ko00941: Flavonoid biosynthesis; ko00945: Stilbenoid, diarylheptanoid and gingerol biosynthesis; ko01100: Metabolic pathways; ko01110: Biosynthesis of secondary metabolites
Solyc08g075210.2	19.77	18.42	-0.10204	K13065 shikimate O-hydroxycinnamoyltransferase [EC:2.3.1.133] | (RefSeq) acylsugar acyltransferase 3-like (A)	ko00940: Phenylpropanoid biosynthesis; ko00941: Flavonoid biosynthesis; ko00945: Stilbenoid, diarylheptanoid and gingerol biosynthesis; ko01100: Metabolic pathways; ko01110: Biosynthesis of secondary metabolites
Solyc11g069680.1	0.02	0	#NUM!	K13065 shikimate O-hydroxycinnamoyltransferase [EC:2.3.1.133] | (RefSeq) acylsugar acyltransferase 3-like (A)	ko00940: Phenylpropanoid biosynthesis; ko00941: Flavonoid biosynthesis; ko00945: Stilbenoid, diarylheptanoid and gingerol biosynthesis; ko01100: Metabolic pathways; ko01110: Biosynthesis of secondary metabolites
Solyc06g074710.1	5.19333	1.39667	-1.89467	K13065 shikimate O-hydroxycinnamoyltransferase [EC:2.3.1.133] | (RefSeq) agmatine coumaroyltransferase-2 (A)	ko00940: Phenylpropanoid biosynthesis; ko00941: Flavonoid biosynthesis; ko00945: Stilbenoid, diarylheptanoid and gingerol biosynthesis; ko01100: Metabolic pathways; ko01110: Biosynthesis of secondary metabolites
Solyc02g079490.3	3.28333	5.63333	0.778828	K13065 shikimate O-hydroxycinnamoyltransferase [EC:2.3.1.133] | (RefSeq) agmatine coumaroyltransferase-2-like (A)	ko00940: Phenylpropanoid biosynthesis; ko00941: Flavonoid biosynthesis; ko00945: Stilbenoid, diarylheptanoid and gingerol biosynthesis; ko01100: Metabolic pathways; ko01110: Biosynthesis of secondary metabolites
Solyc11g071470.1	6.40333	1.81333	-1.82018	K13065 shikimate O-hydroxycinnamoyltransferase [EC:2.3.1.133] | (RefSeq) agmatine hydroxycinnamoyltransferase 1-like (A)	ko00940: Phenylpropanoid biosynthesis; ko00941: Flavonoid biosynthesis; ko00945: Stilbenoid, diarylheptanoid and gingerol biosynthesis; ko01100: Metabolic pathways; ko01110: Biosynthesis of secondary metabolites
Solyc11g071480.1	0.443333	0.0133333	-5.05528	K13065 shikimate O-hydroxycinnamoyltransferase [EC:2.3.1.133] | (RefSeq) agmatine hydroxycinnamoyltransferase 1-like (A)	ko00940: Phenylpropanoid biosynthesis; ko00941: Flavonoid biosynthesis; ko00945: Stilbenoid, diarylheptanoid and gingerol biosynthesis; ko01100: Metabolic pathways; ko01110: Biosynthesis of secondary metabolites
Solyc12g088170.2	55.23	51.7567	-0.0937074	K13065 shikimate O-hydroxycinnamoyltransferase [EC:2.3.1.133] | (RefSeq) anthocyanin acyltransferase (A)	ko00940: Phenylpropanoid biosynthesis; ko00941: Flavonoid biosynthesis; ko00945: Stilbenoid, diarylheptanoid and gingerol biosynthesis; ko01100: Metabolic pathways; ko01110: Biosynthesis of secondary metabolites
Solyc01g105550.1	0.0533333	0	#NUM!	K13065 shikimate O-hydroxycinnamoyltransferase [EC:2.3.1.133] | (RefSeq) AT1; AT1 protein (A)	ko00940: Phenylpropanoid biosynthesis; ko00941: Flavonoid biosynthesis; ko00945: Stilbenoid, diarylheptanoid and gingerol biosynthesis; ko01100: Metabolic pathways; ko01110: Biosynthesis of secondary metabolites
Solyc08g007210.3	9.59	5.25667	-0.867383	K13065 shikimate O-hydroxycinnamoyltransferase [EC:2.3.1.133] | (RefSeq) AT3; AT3 protein (A)	ko00940: Phenylpropanoid biosynthesis; ko00941: Flavonoid biosynthesis; ko00945: Stilbenoid, diarylheptanoid and gingerol biosynthesis; ko01100: Metabolic pathways; ko01110: Biosynthesis of secondary metabolites
Solyc08g078030.3	0.61	0.18	-1.76081	K13065 shikimate O-hydroxycinnamoyltransferase [EC:2.3.1.133] | (RefSeq) AT3; AT3 protein (A)	ko00940: Phenylpropanoid biosynthesis; ko00941: Flavonoid biosynthesis; ko00945: Stilbenoid, diarylheptanoid and gingerol biosynthesis; ko01100: Metabolic pathways; ko01110: Biosynthesis of secondary metabolites
Solyc01g008300.2	0.2	0.273333	0.450661	K13065 shikimate O-hydroxycinnamoyltransferase [EC:2.3.1.133] | (RefSeq) BAHD acyltransferase At5g47980-like isoform X1 (A)	ko00940: Phenylpropanoid biosynthesis; ko00941: Flavonoid biosynthesis; ko00945: Stilbenoid, diarylheptanoid and gingerol biosynthesis; ko01100: Metabolic pathways; ko01110: Biosynthesis of secondary metabolites
Solyc11g008630.2	34.9367	42.6267	0.287014	K13065 shikimate O-hydroxycinnamoyltransferase [EC:2.3.1.133] | (RefSeq) fatty alcohol:caffeoyl-CoA acyltransferase (A)	ko00940: Phenylpropanoid biosynthesis; ko00941: Flavonoid biosynthesis; ko00945: Stilbenoid, diarylheptanoid and gingerol biosynthesis; ko01100: Metabolic pathways; ko01110: Biosynthesis of secondary metabolites
Solyc07g005760.3	23.56	16.99	-0.471654	K13065 shikimate O-hydroxycinnamoyltransferase [EC:2.3.1.133] | (RefSeq) hqt; hydroxycinnamoyl CoA quinate transferase (A)	ko00940: Phenylpropanoid biosynthesis; ko00941: Flavonoid biosynthesis; ko00945: Stilbenoid, diarylheptanoid and gingerol biosynthesis; ko01100: Metabolic pathways; ko01110: Biosynthesis of secondary metabolites
Solyc07g005765.1	1.96333	1.34333	-0.547488	K13065 shikimate O-hydroxycinnamoyltransferase [EC:2.3.1.133] | (RefSeq) hqt; hydroxycinnamoyl CoA quinate transferase (A)	ko00940: Phenylpropanoid biosynthesis; ko00941: Flavonoid biosynthesis; ko00945: Stilbenoid, diarylheptanoid and gingerol biosynthesis; ko01100: Metabolic pathways; ko01110: Biosynthesis of secondary metabolites
Solyc09g092270.3	22.7467	15.2633	-0.575585	K13065 shikimate O-hydroxycinnamoyltransferase [EC:2.3.1.133] | (RefSeq) hqt; hydroxycinnamoyl CoA quinate transferase (A)	ko00940: Phenylpropanoid biosynthesis; ko00941: Flavonoid biosynthesis; ko00945: Stilbenoid, diarylheptanoid and gingerol biosynthesis; ko01100: Metabolic pathways; ko01110: Biosynthesis of secondary metabolites
Solyc02g081770.1	0.0333333	0.0533333	0.678072	K13065 shikimate O-hydroxycinnamoyltransferase [EC:2.3.1.133] | (RefSeq) pelargonidin 3-O-(6-caffeoylglucoside) 5-O-(6-O-malonylglucoside) 4'''-malonyltransferase-like (A)	ko00940: Phenylpropanoid biosynthesis; ko00941: Flavonoid biosynthesis; ko00945: Stilbenoid, diarylheptanoid and gingerol biosynthesis; ko01100: Metabolic pathways; ko01110: Biosynthesis of secondary metabolites
Solyc07g052060.2	0.133333	0.62	2.21723	K13065 shikimate O-hydroxycinnamoyltransferase [EC:2.3.1.133] | (RefSeq) pelargonidin 3-O-(6-caffeoylglucoside) 5-O-(6-O-malonylglucoside) 4'''-malonyltransferase-like (A)	ko00940: Phenylpropanoid biosynthesis; ko00941: Flavonoid biosynthesis; ko00945: Stilbenoid, diarylheptanoid and gingerol biosynthesis; ko01100: Metabolic pathways; ko01110: Biosynthesis of secondary metabolites
Solyc12g005430.1	3.38667	2.41667	-0.486848	K13065 shikimate O-hydroxycinnamoyltransferase [EC:2.3.1.133] | (RefSeq) pelargonidin 3-O-(6-caffeoylglucoside) 5-O-(6-O-malonylglucoside) 4'''-malonyltransferase-like (A)	ko00940: Phenylpropanoid biosynthesis; ko00941: Flavonoid biosynthesis; ko00945: Stilbenoid, diarylheptanoid and gingerol biosynthesis; ko01100: Metabolic pathways; ko01110: Biosynthesis of secondary metabolites
novel.2648	6.96667	2.98	-1.22516	K13065 shikimate O-hydroxycinnamoyltransferase [EC:2.3.1.133] | (RefSeq) pelargonidin 3-O-(6-caffeoylglucoside) 5-O-(6-O-malonylglucoside) 4'''-malonyltransferase-like (A)	ko00940: Phenylpropanoid biosynthesis; ko00941: Flavonoid biosynthesis; ko00945: Stilbenoid, diarylheptanoid and gingerol biosynthesis; ko01100: Metabolic pathways; ko01110: Biosynthesis of secondary metabolites
Solyc07g008380.2	0.74	0.553333	-0.419376	K13065 shikimate O-hydroxycinnamoyltransferase [EC:2.3.1.133] | (RefSeq) salutaridinol 7-O-acetyltransferase-like (A)	ko00940: Phenylpropanoid biosynthesis; ko00941: Flavonoid biosynthesis; ko00945: Stilbenoid, diarylheptanoid and gingerol biosynthesis; ko01100: Metabolic pathways; ko01110: Biosynthesis of secondary metabolites
Solyc07g008390.2	0.0666667	0.0766667	0.201634	K13065 shikimate O-hydroxycinnamoyltransferase [EC:2.3.1.133] | (RefSeq) salutaridinol 7-O-acetyltransferase-like (A)	ko00940: Phenylpropanoid biosynthesis; ko00941: Flavonoid biosynthesis; ko00945: Stilbenoid, diarylheptanoid and gingerol biosynthesis; ko01100: Metabolic pathways; ko01110: Biosynthesis of secondary metabolites
Solyc12g087980.2	0.53	0.35	-0.598637	K13065 shikimate O-hydroxycinnamoyltransferase [EC:2.3.1.133] | (RefSeq) spermidine hydroxycinnamoyl transferase (A)	ko00940: Phenylpropanoid biosynthesis; ko00941: Flavonoid biosynthesis; ko00945: Stilbenoid, diarylheptanoid and gingerol biosynthesis; ko01100: Metabolic pathways; ko01110: Biosynthesis of secondary metabolites
Solyc04g082360.2	3.33	3.12333	-0.0924356	K13065 shikimate O-hydroxycinnamoyltransferase [EC:2.3.1.133] | (RefSeq) vinorine synthase (A)	ko00940: Phenylpropanoid biosynthesis; ko00941: Flavonoid biosynthesis; ko00945: Stilbenoid, diarylheptanoid and gingerol biosynthesis; ko01100: Metabolic pathways; ko01110: Biosynthesis of secondary metabolites
Solyc06g051320.3	0.136667	0.326667	1.25716	K13065 shikimate O-hydroxycinnamoyltransferase [EC:2.3.1.133] | (RefSeq) vinorine synthase (A)	ko00940: Phenylpropanoid biosynthesis; ko00941: Flavonoid biosynthesis; ko00945: Stilbenoid, diarylheptanoid and gingerol biosynthesis; ko01100: Metabolic pathways; ko01110: Biosynthesis of secondary metabolites
Solyc07g006680.1	22.6967	20.3533	-0.157215	K13065 shikimate O-hydroxycinnamoyltransferase [EC:2.3.1.133] | (RefSeq) vinorine synthase (A)	ko00940: Phenylpropanoid biosynthesis; ko00941: Flavonoid biosynthesis; ko00945: Stilbenoid, diarylheptanoid and gingerol biosynthesis; ko01100: Metabolic pathways; ko01110: Biosynthesis of secondary metabolites
Solyc05g050760.1	0	0.233333	#DIV/0!	K13065 shikimate O-hydroxycinnamoyltransferase [EC:2.3.1.133] | (RefSeq) vinorine synthase-like (A)	ko00940: Phenylpropanoid biosynthesis; ko00941: Flavonoid biosynthesis; ko00945: Stilbenoid, diarylheptanoid and gingerol biosynthesis; ko01100: Metabolic pathways; ko01110: Biosynthesis of secondary metabolites
Solyc07g006670.1	5.94333	5.17	-0.201108	K13065 shikimate O-hydroxycinnamoyltransferase [EC:2.3.1.133] | (RefSeq) vinorine synthase-like (A)	ko00940: Phenylpropanoid biosynthesis; ko00941: Flavonoid biosynthesis; ko00945: Stilbenoid, diarylheptanoid and gingerol biosynthesis; ko01100: Metabolic pathways; ko01110: Biosynthesis of secondary metabolites
Solyc12g096770.1	100.57	52.9733	-0.924862	K13065 shikimate O-hydroxycinnamoyltransferase [EC:2.3.1.133] | (RefSeq) vinorine synthase-like (A)	ko00940: Phenylpropanoid biosynthesis; ko00941: Flavonoid biosynthesis; ko00945: Stilbenoid, diarylheptanoid and gingerol biosynthesis; ko01100: Metabolic pathways; ko01110: Biosynthesis of secondary metabolites
Solyc12g096790.1	0.0533333	0	#NUM!	K13065 shikimate O-hydroxycinnamoyltransferase [EC:2.3.1.133] | (RefSeq) vinorine synthase-like (A)	ko00940: Phenylpropanoid biosynthesis; ko00941: Flavonoid biosynthesis; ko00945: Stilbenoid, diarylheptanoid and gingerol biosynthesis; ko01100: Metabolic pathways; ko01110: Biosynthesis of secondary metabolites
Solyc12g096800.1	4.59	2.53	-0.859357	K13065 shikimate O-hydroxycinnamoyltransferase [EC:2.3.1.133] | (RefSeq) vinorine synthase-like (A)	ko00940: Phenylpropanoid biosynthesis; ko00941: Flavonoid biosynthesis; ko00945: Stilbenoid, diarylheptanoid and gingerol biosynthesis; ko01100: Metabolic pathways; ko01110: Biosynthesis of secondary metabolites
Solyc01g094070.3	0.0366667	0.206667	2.49476	K13082 bifunctional dihydroflavonol 4-reductase/flavanone 4-reductase [EC:1.1.1.219 1.1.1.234] | (RefSeq) dihydroflavonol 4-reductase (A)	ko00941: Flavonoid biosynthesis; ko01100: Metabolic pathways; ko01110: Biosynthesis of secondary metabolites
Solyc02g085020.3	75.2733	63.28	-0.250389	K13082 bifunctional dihydroflavonol 4-reductase/flavanone 4-reductase [EC:1.1.1.219 1.1.1.234] | (RefSeq) dihydroflavonol 4-reductase (A)	ko00941: Flavonoid biosynthesis; ko01100: Metabolic pathways; ko01110: Biosynthesis of secondary metabolites
Solyc10g009503.1	0.16	0	#NUM!	K13082 bifunctional dihydroflavonol 4-reductase/flavanone 4-reductase [EC:1.1.1.219 1.1.1.234] | (RefSeq) dihydroflavonol 4-reductase (A)	ko00941: Flavonoid biosynthesis; ko01100: Metabolic pathways; ko01110: Biosynthesis of secondary metabolites
Solyc10g009530.3	0.796667	1.1	0.465455	K13082 bifunctional dihydroflavonol 4-reductase/flavanone 4-reductase [EC:1.1.1.219 1.1.1.234] | (RefSeq) dihydroflavonol 4-reductase (A)	ko00941: Flavonoid biosynthesis; ko01100: Metabolic pathways; ko01110: Biosynthesis of secondary metabolites
Solyc08g079317.1	0.256667	0.406667	0.663951	K13083 flavonoid 3',5'-hydroxylase [EC:1.14.14.81] | (RefSeq) putative flavonoid 3'5' hydroxylase (A)	ko00941: Flavonoid biosynthesis; ko00944: Flavone and flavonol biosynthesis; ko01110: Biosynthesis of secondary metabolites
Solyc01g107475.1	0	0.0666667	#DIV/0!	K13260 isoflavone/4'-methoxyisoflavone 2'-hydroxylase [EC:1.14.14.90 1.14.14.89] | (RefSeq) cytochrome P450 81D1-like (A)	ko00943: Isoflavonoid biosynthesis; ko01100: Metabolic pathways; ko01110: Biosynthesis of secondary metabolites
Solyc02g092870.2	0.0766667	0.0466667	-0.716207	K13260 isoflavone/4'-methoxyisoflavone 2'-hydroxylase [EC:1.14.14.90 1.14.14.89] | (RefSeq) cytochrome P450 81D1-like (A)	ko00943: Isoflavonoid biosynthesis; ko01100: Metabolic pathways; ko01110: Biosynthesis of secondary metabolites
Solyc04g078280.3	4.16333	3.08	-0.434809	K13260 isoflavone/4'-methoxyisoflavone 2'-hydroxylase [EC:1.14.14.90 1.14.14.89] | (RefSeq) cytochrome P450 81D1-like (A)	ko00943: Isoflavonoid biosynthesis; ko01100: Metabolic pathways; ko01110: Biosynthesis of secondary metabolites
Solyc04g078290.3	16.3367	9.61	-0.765505	K13260 isoflavone/4'-methoxyisoflavone 2'-hydroxylase [EC:1.14.14.90 1.14.14.89] | (RefSeq) cytochrome P450 81D1-like (A)	ko00943: Isoflavonoid biosynthesis; ko01100: Metabolic pathways; ko01110: Biosynthesis of secondary metabolites
Solyc04g078360.2	0.846667	0.72	-0.233797	K13260 isoflavone/4'-methoxyisoflavone 2'-hydroxylase [EC:1.14.14.90 1.14.14.89] | (RefSeq) cytochrome P450 81D1-like (A)	ko00943: Isoflavonoid biosynthesis; ko01100: Metabolic pathways; ko01110: Biosynthesis of secondary metabolites
Solyc07g014670.3	19.37	14.5633	-0.411483	K13260 isoflavone/4'-methoxyisoflavone 2'-hydroxylase [EC:1.14.14.90 1.14.14.89] | (RefSeq) cytochrome P450 81D1-like (A)	ko00943: Isoflavonoid biosynthesis; ko01100: Metabolic pathways; ko01110: Biosynthesis of secondary metabolites
Solyc09g031875.1	0.533333	0.246667	-1.11247	K13260 isoflavone/4'-methoxyisoflavone 2'-hydroxylase [EC:1.14.14.90 1.14.14.89] | (RefSeq) cytochrome P450 81D1-like (A)	ko00943: Isoflavonoid biosynthesis; ko01100: Metabolic pathways; ko01110: Biosynthesis of secondary metabolites
Solyc12g088460.2	3.62667	3.18	-0.189617	K13260 isoflavone/4'-methoxyisoflavone 2'-hydroxylase [EC:1.14.14.90 1.14.14.89] | (RefSeq) cytochrome P450 81D1-like (A)	ko00943: Isoflavonoid biosynthesis; ko01100: Metabolic pathways; ko01110: Biosynthesis of secondary metabolites
Solyc12g088510.1	0	0.05	#DIV/0!	K13260 isoflavone/4'-methoxyisoflavone 2'-hydroxylase [EC:1.14.14.90 1.14.14.89] | (RefSeq) cytochrome P450 81D1-like (A)	ko00943: Isoflavonoid biosynthesis; ko01100: Metabolic pathways; ko01110: Biosynthesis of secondary metabolites
Solyc03g032020.3	5.97667	5.09667	-0.229787	K00021 hydroxymethylglutaryl-CoA reductase (NADPH) [EC:1.1.1.34] | (RefSeq) 3-hydroxy-3-methylglutaryl-coenzyme A reductase 3 (A)	ko00900: Terpenoid backbone biosynthesis; ko01100: Metabolic pathways; ko01110: Biosynthesis of secondary metabolites
Solyc02g038740.3	2.02333	1.74667	-0.21213	K00021 hydroxymethylglutaryl-CoA reductase (NADPH) [EC:1.1.1.34] | (RefSeq) HMG2; 3-hydroxy-3-methylglutaryl-coenzyme A reductase 2 (A)	ko00900: Terpenoid backbone biosynthesis; ko01100: Metabolic pathways; ko01110: Biosynthesis of secondary metabolites
Solyc02g082260.3	5.61333	4.4	-0.351354	K00021 hydroxymethylglutaryl-CoA reductase (NADPH) [EC:1.1.1.34] | (RefSeq) HMGR; 3-hydroxy-3-methylglutaryl-coenzyme A reductase 1 (A)	ko00900: Terpenoid backbone biosynthesis; ko01100: Metabolic pathways; ko01110: Biosynthesis of secondary metabolites
Solyc03g114340.3	133.117	127.987	-0.0566977	K00099 1-deoxy-D-xylulose-5-phosphate reductoisomerase [EC:1.1.1.267] | (RefSeq) DXR; 1-deoxy-D-xylulose-5-phosphate reductoisomerase (A)	ko00900: Terpenoid backbone biosynthesis; ko01100: Metabolic pathways; ko01110: Biosynthesis of secondary metabolites
Solyc07g045050.3	32.5167	31.0233	-0.0678257	K00457 4-hydroxyphenylpyruvate dioxygenase [EC:1.13.11.27] | (RefSeq) 4-hydroxyphenylpyruvate dioxygenase (A)	ko00130: Ubiquinone and other terpenoid-quinone biosynthesis; ko00350: Tyrosine metabolism; ko00360: Phenylalanine metabolism; ko01100: Metabolic pathways; ko01240: Biosynthesis of cofactors
Solyc05g041200.3	65.2267	49.9933	-0.383726	K00457 4-hydroxyphenylpyruvate dioxygenase [EC:1.13.11.27] | (RefSeq) 4-hydroxyphenylpyruvate dioxygenase-like (A)	ko00130: Ubiquinone and other terpenoid-quinone biosynthesis; ko00350: Tyrosine metabolism; ko00360: Phenylalanine metabolism; ko01100: Metabolic pathways; ko01240: Biosynthesis of cofactors
Solyc05g047530.3	0.76	0.683333	-0.15341	K00487 trans-cinnamate 4-monooxygenase [EC:1.14.14.91] | (RefSeq) cytochrome P450 CYP73A100 (A)	ko00130: Ubiquinone and other terpenoid-quinone biosynthesis; ko00940: Phenylpropanoid biosynthesis; ko00941: Flavonoid biosynthesis; ko00945: Stilbenoid, diarylheptanoid and gingerol biosynthesis; ko01100: Metabolic pathways; ko01110: Biosynthesis of secondary metabolites
Solyc06g082535.1	86.7333	49.0833	-0.821353	K00487 trans-cinnamate 4-monooxygenase [EC:1.14.14.91] | (RefSeq) trans-cinnamate 4-monooxygenase (A)	ko00130: Ubiquinone and other terpenoid-quinone biosynthesis; ko00940: Phenylpropanoid biosynthesis; ko00941: Flavonoid biosynthesis; ko00945: Stilbenoid, diarylheptanoid and gingerol biosynthesis; ko01100: Metabolic pathways; ko01110: Biosynthesis of secondary metabolites
Solyc06g082530.2	25.7533	12.1433	-1.08459	K00487 trans-cinnamate 4-monooxygenase [EC:1.14.14.91] | (RefSeq) trans-cinnamate 4-monooxygenase isoform X2 (A)	ko00130: Ubiquinone and other terpenoid-quinone biosynthesis; ko00940: Phenylpropanoid biosynthesis; ko00941: Flavonoid biosynthesis; ko00945: Stilbenoid, diarylheptanoid and gingerol biosynthesis; ko01100: Metabolic pathways; ko01110: Biosynthesis of secondary metabolites
Solyc00g085070.3	0.01	0.01	0	K00511 squalene monooxygenase [EC:1.14.14.17] | (RefSeq) bc2.1; squalene monooxigenase 2 (A)	ko00100: Steroid biosynthesis; ko00909: Sesquiterpenoid and triterpenoid biosynthesis; ko01100: Metabolic pathways; ko01110: Biosynthesis of secondary metabolites
Solyc02g063542.1	1.83667	1.89	0.0412964	K00511 squalene monooxygenase [EC:1.14.14.17] | (RefSeq) bc2.1; squalene monooxigenase 2 (A)	ko00100: Steroid biosynthesis; ko00909: Sesquiterpenoid and triterpenoid biosynthesis; ko01100: Metabolic pathways; ko01110: Biosynthesis of secondary metabolites
Solyc02g063546.1	10.9867	17.6733	0.68582	K00511 squalene monooxygenase [EC:1.14.14.17] | (RefSeq) bc2.1; squalene monooxigenase 2 (A)	ko00100: Steroid biosynthesis; ko00909: Sesquiterpenoid and triterpenoid biosynthesis; ko01100: Metabolic pathways; ko01110: Biosynthesis of secondary metabolites
Solyc04g077430.3	2.48	2.08	-0.253757	K00511 squalene monooxygenase [EC:1.14.14.17] | (RefSeq) squalene monooxygenase (A)	ko00100: Steroid biosynthesis; ko00909: Sesquiterpenoid and triterpenoid biosynthesis; ko01100: Metabolic pathways; ko01110: Biosynthesis of secondary metabolites
Solyc04g077440.3	57.3867	44.8067	-0.357002	K00511 squalene monooxygenase [EC:1.14.14.17] | (RefSeq) squalene monooxygenase (A)	ko00100: Steroid biosynthesis; ko00909: Sesquiterpenoid and triterpenoid biosynthesis; ko01100: Metabolic pathways; ko01110: Biosynthesis of secondary metabolites
Solyc04g009010.2	7.54333	7.66333	0.0227699	K00587 protein-S-isoprenylcysteine O-methyltransferase [EC:2.1.1.100] | (RefSeq) protein-S-isoprenylcysteine O-methyltransferase A isoform X1 (A)	ko00900: Terpenoid backbone biosynthesis; ko01110: Biosynthesis of secondary metabolites
Solyc07g055850.3	6.64	6.51333	-0.0277872	K00591 polyprenyldihydroxybenzoate methyltransferase / 3-demethylubiquinol 3-O-methyltransferase [EC:2.1.1.114 2.1.1.64] | (RefSeq) ubiquinone biosynthesis O-methyltransferase, mitochondrial (A)	ko00130: Ubiquinone and other terpenoid-quinone biosynthesis; ko01100: Metabolic pathways; ko01110: Biosynthesis of secondary metabolites; ko01240: Biosynthesis of cofactors
Solyc05g017760.3	15.2933	17.95	0.231081	K00626 acetyl-CoA C-acetyltransferase [EC:2.3.1.9] | (RefSeq) acetyl-CoA acetyltransferase, cytosolic 1 (A)	ko00071: Fatty acid degradation; ko00072: Synthesis and degradation of ketone bodies; ko00280: Valine, leucine and isoleucine degradation; ko00310: Lysine degradation; ko00380: Tryptophan metabolism; ko00620: Pyruvate metabolism; ko00630: Glyoxylate and dicarboxylate metabolism; ko00640: Propanoate metabolism; ko00650: Butanoate metabolism; ko00900: Terpenoid backbone biosynthesis; ko01100: Metab…
Solyc07g045350.3	2.31	1.87	-0.304855	K00626 acetyl-CoA C-acetyltransferase [EC:2.3.1.9] | (RefSeq) acetyl-CoA acetyltransferase, cytosolic 1 (A)	ko00071: Fatty acid degradation; ko00072: Synthesis and degradation of ketone bodies; ko00280: Valine, leucine and isoleucine degradation; ko00310: Lysine degradation; ko00380: Tryptophan metabolism; ko00620: Pyruvate metabolism; ko00630: Glyoxylate and dicarboxylate metabolism; ko00640: Propanoate metabolism; ko00650: Butanoate metabolism; ko00900: Terpenoid backbone biosynthesis; ko01100: Metab…
Solyc04g015100.3	18.0533	17.94	-0.00908535	K00626 acetyl-CoA C-acetyltransferase [EC:2.3.1.9] | (RefSeq) probable acetyl-CoA acetyltransferase, cytosolic 2 (A)	ko00071: Fatty acid degradation; ko00072: Synthesis and degradation of ketone bodies; ko00280: Valine, leucine and isoleucine degradation; ko00310: Lysine degradation; ko00380: Tryptophan metabolism; ko00620: Pyruvate metabolism; ko00630: Glyoxylate and dicarboxylate metabolism; ko00640: Propanoate metabolism; ko00650: Butanoate metabolism; ko00900: Terpenoid backbone biosynthesis; ko01100: Metab…
Solyc10g005820.2	1.98333	2.41	0.281106	K00787 farnesyl diphosphate synthase [EC:2.5.1.1 2.5.1.10] | (RefSeq) farnesyl pyrophosphate synthase 1-like isoform X1 (A)	ko00900: Terpenoid backbone biosynthesis; ko01100: Metabolic pathways; ko01110: Biosynthesis of secondary metabolites
Solyc10g005840.3	13.8133	14.9667	0.115691	K00787 farnesyl diphosphate synthase [EC:2.5.1.1 2.5.1.10] | (RefSeq) farnesyl pyrophosphate synthase 2 isoform X3 (A)	ko00900: Terpenoid backbone biosynthesis; ko01100: Metabolic pathways; ko01110: Biosynthesis of secondary metabolites
Solyc12g015860.2	57.0167	55.68	-0.0342245	K00787 farnesyl diphosphate synthase [EC:2.5.1.1 2.5.1.10] | (RefSeq) FPPS1; farnesyl pyrophosphate synthase (A)	ko00900: Terpenoid backbone biosynthesis; ko01100: Metabolic pathways; ko01110: Biosynthesis of secondary metabolites
Solyc01g110290.3	53.8267	56.8533	0.0789239	K00801 farnesyl-diphosphate farnesyltransferase [EC:2.5.1.21] | (RefSeq) SQS1; squalene synthase (A)	ko00100: Steroid biosynthesis; ko00909: Sesquiterpenoid and triterpenoid biosynthesis; ko01100: Metabolic pathways; ko01110: Biosynthesis of secondary metabolites
Solyc10g079040.2	0	0.0166667	#DIV/0!	K00801 farnesyl-diphosphate farnesyltransferase [EC:2.5.1.21] | (RefSeq) squalene synthase-like isoform X1 (A)	ko00100: Steroid biosynthesis; ko00909: Sesquiterpenoid and triterpenoid biosynthesis; ko01100: Metabolic pathways; ko01110: Biosynthesis of secondary metabolites
Solyc10g079060.2	0	0.0133333	#DIV/0!	K00801 farnesyl-diphosphate farnesyltransferase [EC:2.5.1.21] | (RefSeq) squalene synthase-like isoform X1 (A)	ko00100: Steroid biosynthesis; ko00909: Sesquiterpenoid and triterpenoid biosynthesis; ko01100: Metabolic pathways; ko01110: Biosynthesis of secondary metabolites
Solyc10g054130.2	0.0266667	0.0166667	-0.678072	K00801 farnesyl-diphosphate farnesyltransferase [EC:2.5.1.21] | (RefSeq) squalene synthase-like isoform X2 (A)	ko00100: Steroid biosynthesis; ko00909: Sesquiterpenoid and triterpenoid biosynthesis; ko01100: Metabolic pathways; ko01110: Biosynthesis of secondary metabolites
Solyc10g007110.3	84.48	67.77	-0.317963	K00815 tyrosine aminotransferase [EC:2.6.1.5] | (RefSeq) probable aminotransferase TAT2 (A)	ko00130: Ubiquinone and other terpenoid-quinone biosynthesis; ko00270: Cysteine and methionine metabolism; ko00350: Tyrosine metabolism; ko00360: Phenylalanine metabolism; ko00400: Phenylalanine, tyrosine and tryptophan biosynthesis; ko00950: Isoquinoline alkaloid biosynthesis; ko00960: Tropane, piperidine and pyridine alkaloid biosynthesis; ko01100: Metabolic pathways; ko01110: Biosynthesis of s…
Solyc12g088000.2	0.0566667	0	#NUM!	K00815 tyrosine aminotransferase [EC:2.6.1.5] | (RefSeq) probable aminotransferase TAT2 (A)	ko00130: Ubiquinone and other terpenoid-quinone biosynthesis; ko00270: Cysteine and methionine metabolism; ko00350: Tyrosine metabolism; ko00360: Phenylalanine metabolism; ko00400: Phenylalanine, tyrosine and tryptophan biosynthesis; ko00950: Isoquinoline alkaloid biosynthesis; ko00960: Tropane, piperidine and pyridine alkaloid biosynthesis; ko01100: Metabolic pathways; ko01110: Biosynthesis of s…
Solyc10g008200.3	8.04333	11.9733	0.573959	K00815 tyrosine aminotransferase [EC:2.6.1.5] | (RefSeq) probable aminotransferase TAT2 isoform X1 (A)	ko00130: Ubiquinone and other terpenoid-quinone biosynthesis; ko00270: Cysteine and methionine metabolism; ko00350: Tyrosine metabolism; ko00360: Phenylalanine metabolism; ko00400: Phenylalanine, tyrosine and tryptophan biosynthesis; ko00950: Isoquinoline alkaloid biosynthesis; ko00960: Tropane, piperidine and pyridine alkaloid biosynthesis; ko01100: Metabolic pathways; ko01110: Biosynthesis of s…
Solyc07g053720.3	55.9967	45.0233	-0.314668	K00815 tyrosine aminotransferase [EC:2.6.1.5] | (RefSeq) S-alkyl-thiohydroximate lyase-like (A)	ko00130: Ubiquinone and other terpenoid-quinone biosynthesis; ko00270: Cysteine and methionine metabolism; ko00350: Tyrosine metabolism; ko00360: Phenylalanine metabolism; ko00400: Phenylalanine, tyrosine and tryptophan biosynthesis; ko00950: Isoquinoline alkaloid biosynthesis; ko00960: Tropane, piperidine and pyridine alkaloid biosynthesis; ko01100: Metabolic pathways; ko01110: Biosynthesis of s…
Solyc07g053710.3	11.8267	12.7867	0.112597	K00815 tyrosine aminotransferase [EC:2.6.1.5] | (RefSeq) tyrosine aminotransferase-like (A)	ko00130: Ubiquinone and other terpenoid-quinone biosynthesis; ko00270: Cysteine and methionine metabolism; ko00350: Tyrosine metabolism; ko00360: Phenylalanine metabolism; ko00400: Phenylalanine, tyrosine and tryptophan biosynthesis; ko00950: Isoquinoline alkaloid biosynthesis; ko00960: Tropane, piperidine and pyridine alkaloid biosynthesis; ko01100: Metabolic pathways; ko01110: Biosynthesis of s…
Solyc01g098840.3	13.1933	10.6767	-0.305348	K00869 mevalonate kinase [EC:2.7.1.36] | (RefSeq) mevalonate kinase (A)	ko00900: Terpenoid backbone biosynthesis; ko01100: Metabolic pathways; ko01110: Biosynthesis of secondary metabolites; ko04146: Peroxisome
Solyc01g009010.3	27.3167	25.2367	-0.11426	K00919 4-diphosphocytidyl-2-C-methyl-D-erythritol kinase [EC:2.7.1.148] | (RefSeq) 4-diphosphocytidyl-2-C-methyl-D-erythritol kinase, chloroplastic/chromoplastic (A)	ko00900: Terpenoid backbone biosynthesis; ko01100: Metabolic pathways; ko01110: Biosynthesis of secondary metabolites
Solyc08g076140.3	6.16	6.11	-0.011758	K00938 phosphomevalonate kinase [EC:2.7.4.2] | (RefSeq) phosphomevalonate kinase, peroxisomal isoform X2 (A)	ko00900: Terpenoid backbone biosynthesis; ko01100: Metabolic pathways; ko01110: Biosynthesis of secondary metabolites
Solyc06g066310.3	5.44667	4.68	-0.218865	K00938 phosphomevalonate kinase [EC:2.7.4.2] | (RefSeq) phosphomevalonate kinase, peroxisomal-like (A)	ko00900: Terpenoid backbone biosynthesis; ko01100: Metabolic pathways; ko01110: Biosynthesis of secondary metabolites
Solyc01g102820.3	69.9867	61.2533	-0.192292	K00991 2-C-methyl-D-erythritol 4-phosphate cytidylyltransferase [EC:2.7.7.60] | (RefSeq) 2-C-methyl-D-erythritol 4-phosphate cytidylyltransferase, chloroplastic isoform X1 (A)	ko00900: Terpenoid backbone biosynthesis; ko01100: Metabolic pathways; ko01110: Biosynthesis of secondary metabolites
Solyc04g009650.3	9.21333	10.8567	0.236786	K01597 diphosphomevalonate decarboxylase [EC:4.1.1.33] | (RefSeq) diphosphomevalonate decarboxylase MVD2, peroxisomal-like (A)	ko00900: Terpenoid backbone biosynthesis; ko01100: Metabolic pathways; ko01110: Biosynthesis of secondary metabolites
Solyc04g009655.1	4.75667	5.09333	0.0986592	K01597 diphosphomevalonate decarboxylase [EC:4.1.1.33] | (RefSeq) diphosphomevalonate decarboxylase MVD2, peroxisomal-like (A)	ko00900: Terpenoid backbone biosynthesis; ko01100: Metabolic pathways; ko01110: Biosynthesis of secondary metabolites
Solyc11g007020.2	13.5733	10.6167	-0.354444	K01597 diphosphomevalonate decarboxylase [EC:4.1.1.33] | (RefSeq) MDC; mevalonate disphosphate decarboxylase (A)	ko00900: Terpenoid backbone biosynthesis; ko01100: Metabolic pathways; ko01110: Biosynthesis of secondary metabolites
Solyc08g007790.3	5.91	6.14667	0.0566461	K01641 hydroxymethylglutaryl-CoA synthase [EC:2.3.3.10] | (RefSeq) HMGS; 3-hydroxy-3-methylglutaryl coenzyme A synthase (A)	ko00072: Synthesis and degradation of ketone bodies; ko00280: Valine, leucine and isoleucine degradation; ko00650: Butanoate metabolism; ko00900: Terpenoid backbone biosynthesis; ko01100: Metabolic pathways; ko01110: Biosynthesis of secondary metabolites
Solyc08g080160.3	4.51667	1.43667	-1.65253	K01641 hydroxymethylglutaryl-CoA synthase [EC:2.3.3.10] | (RefSeq) hydroxymethylglutaryl-CoA synthase (A)	ko00072: Synthesis and degradation of ketone bodies; ko00280: Valine, leucine and isoleucine degradation; ko00650: Butanoate metabolism; ko00900: Terpenoid backbone biosynthesis; ko01100: Metabolic pathways; ko01110: Biosynthesis of secondary metabolites
Solyc08g080170.3	109.833	127.367	0.213672	K01641 hydroxymethylglutaryl-CoA synthase [EC:2.3.3.10] | (RefSeq) hydroxymethylglutaryl-CoA synthase (A)	ko00072: Synthesis and degradation of ketone bodies; ko00280: Valine, leucine and isoleucine degradation; ko00650: Butanoate metabolism; ko00900: Terpenoid backbone biosynthesis; ko01100: Metabolic pathways; ko01110: Biosynthesis of secondary metabolites
Solyc12g056450.2	4.62	5.03	0.122666	K01641 hydroxymethylglutaryl-CoA synthase [EC:2.3.3.10] | (RefSeq) hydroxymethylglutaryl-CoA synthase-like (A)	ko00072: Synthesis and degradation of ketone bodies; ko00280: Valine, leucine and isoleucine degradation; ko00650: Butanoate metabolism; ko00900: Terpenoid backbone biosynthesis; ko01100: Metabolic pathways; ko01110: Biosynthesis of secondary metabolites
Solyc05g005180.3	50.4933	60.2633	0.255188	K01661 naphthoate synthase [EC:4.1.3.36] | (RefSeq) 1,4-dihydroxy-2-naphthoyl-CoA synthase, peroxisomal (A)	ko00130: Ubiquinone and other terpenoid-quinone biosynthesis; ko01100: Metabolic pathways; ko01110: Biosynthesis of secondary metabolites; ko01240: Biosynthesis of cofactors
Solyc01g067890.3	96.16	117.557	0.289848	K01662 1-deoxy-D-xylulose-5-phosphate synthase [EC:2.2.1.7] | (RefSeq) dxs; 1-D-deoxyxylulose 5-phosphate synthase (A)	ko00730: Thiamine metabolism; ko00900: Terpenoid backbone biosynthesis; ko01100: Metabolic pathways; ko01110: Biosynthesis of secondary metabolites
Solyc11g010850.2	9.50333	12.4233	0.386547	K01662 1-deoxy-D-xylulose-5-phosphate synthase [EC:2.2.1.7] | (RefSeq) dxs2; 1-deoxy-D-xylulose 5-phosphate synthase 2 (A)	ko00730: Thiamine metabolism; ko00900: Terpenoid backbone biosynthesis; ko01100: Metabolic pathways; ko01110: Biosynthesis of secondary metabolites
Solyc08g066950.3	8.15667	8.34	0.0320677	K01662 1-deoxy-D-xylulose-5-phosphate synthase [EC:2.2.1.7] | (RefSeq) probable 1-deoxy-D-xylulose-5-phosphate synthase, chloroplastic (A)	ko00730: Thiamine metabolism; ko00900: Terpenoid backbone biosynthesis; ko01100: Metabolic pathways; ko01110: Biosynthesis of secondary metabolites
Solyc08g081570.3	65.91	63.3833	-0.0563938	K01770 2-C-methyl-D-erythritol 2,4-cyclodiphosphate synthase [EC:4.6.1.12] | (RefSeq) 2-C-methyl-D-erythritol 2,4-cyclodiphosphate synthase, chloroplastic (A)	ko00900: Terpenoid backbone biosynthesis; ko01100: Metabolic pathways; ko01110: Biosynthesis of secondary metabolites
Solyc04g056390.3	131.777	115.99	-0.184095	K01823 isopentenyl-diphosphate Delta-isomerase [EC:5.3.3.2] | (RefSeq) IDI1; isopentenyl diphosphate isomerase (A)	ko00900: Terpenoid backbone biosynthesis; ko01100: Metabolic pathways; ko01110: Biosynthesis of secondary metabolites
Solyc05g055760.3	27.7833	21.0133	-0.402915	K01823 isopentenyl-diphosphate Delta-isomerase [EC:5.3.3.2] | (RefSeq) IPI; isopentenyl diphosphate isomerase (A)	ko00900: Terpenoid backbone biosynthesis; ko01100: Metabolic pathways; ko01110: Biosynthesis of secondary metabolites
Solyc03g117870.3	138.223	71.2367	-0.956309	K01904 4-coumarate--CoA ligase [EC:6.2.1.12] | (RefSeq) 4CL; 4-coumarate--CoA ligase (A)	ko00130: Ubiquinone and other terpenoid-quinone biosynthesis; ko00940: Phenylpropanoid biosynthesis; ko01100: Metabolic pathways; ko01110: Biosynthesis of secondary metabolites
Solyc03g097030.3	22.2033	15.6467	-0.504921	K01904 4-coumarate--CoA ligase [EC:6.2.1.12] | (RefSeq) 4-coumarate--CoA ligase (A)	ko00130: Ubiquinone and other terpenoid-quinone biosynthesis; ko00940: Phenylpropanoid biosynthesis; ko01100: Metabolic pathways; ko01110: Biosynthesis of secondary metabolites
Solyc06g068650.3	103.963	58.4767	-0.830142	K01904 4-coumarate--CoA ligase [EC:6.2.1.12] | (RefSeq) 4-coumarate--CoA ligase (A)	ko00130: Ubiquinone and other terpenoid-quinone biosynthesis; ko00940: Phenylpropanoid biosynthesis; ko01100: Metabolic pathways; ko01110: Biosynthesis of secondary metabolites
Solyc07g008360.2	48.87	43.1467	-0.1797	K01904 4-coumarate--CoA ligase [EC:6.2.1.12] | (RefSeq) 4-coumarate--CoA ligase 2 (A)	ko00130: Ubiquinone and other terpenoid-quinone biosynthesis; ko00940: Phenylpropanoid biosynthesis; ko01100: Metabolic pathways; ko01110: Biosynthesis of secondary metabolites
Solyc01g006640.1	0	0.0166667	#DIV/0!	K01904 4-coumarate--CoA ligase [EC:6.2.1.12] | (RefSeq) 4-coumarate--CoA ligase-like (A)	ko00130: Ubiquinone and other terpenoid-quinone biosynthesis; ko00940: Phenylpropanoid biosynthesis; ko01100: Metabolic pathways; ko01110: Biosynthesis of secondary metabolites
Solyc12g042460.2	0.616667	0.783333	0.345135	K01904 4-coumarate--CoA ligase [EC:6.2.1.12] | (RefSeq) 4-coumarate--CoA ligase-like (A)	ko00130: Ubiquinone and other terpenoid-quinone biosynthesis; ko00940: Phenylpropanoid biosynthesis; ko01100: Metabolic pathways; ko01110: Biosynthesis of secondary metabolites
Solyc02g088705.1	43.0533	36.5333	-0.236912	K01904 4-coumarate--CoA ligase [EC:6.2.1.12] | (RefSeq) 4-coumarate--CoA ligase-like 1 (A)	ko00130: Ubiquinone and other terpenoid-quinone biosynthesis; ko00940: Phenylpropanoid biosynthesis; ko01100: Metabolic pathways; ko01110: Biosynthesis of secondary metabolites
Solyc02g088720.3	7.40667	8.21333	0.149143	K01904 4-coumarate--CoA ligase [EC:6.2.1.12] | (RefSeq) 4-coumarate--CoA ligase-like 1 (A)	ko00130: Ubiquinone and other terpenoid-quinone biosynthesis; ko00940: Phenylpropanoid biosynthesis; ko01100: Metabolic pathways; ko01110: Biosynthesis of secondary metabolites
Solyc08g076300.3	234.96	291.083	0.309017	K01904 4-coumarate--CoA ligase [EC:6.2.1.12] | (RefSeq) 4-coumarate--CoA ligase-like 6 (A)	ko00130: Ubiquinone and other terpenoid-quinone biosynthesis; ko00940: Phenylpropanoid biosynthesis; ko01100: Metabolic pathways; ko01110: Biosynthesis of secondary metabolites
Solyc04g080480.1	0.183333	0.0166667	-3.45943	K01904 4-coumarate--CoA ligase [EC:6.2.1.12] | (RefSeq) 4-coumarate--CoA ligase-like 7 (A)	ko00130: Ubiquinone and other terpenoid-quinone biosynthesis; ko00940: Phenylpropanoid biosynthesis; ko01100: Metabolic pathways; ko01110: Biosynthesis of secondary metabolites
Solyc11g069050.2	38.2633	33.7433	-0.18136	K01904 4-coumarate--CoA ligase [EC:6.2.1.12] | (RefSeq) 4-coumarate--CoA ligase-like 7 (A)	ko00130: Ubiquinone and other terpenoid-quinone biosynthesis; ko00940: Phenylpropanoid biosynthesis; ko01100: Metabolic pathways; ko01110: Biosynthesis of secondary metabolites
Solyc03g111170.3	21.0267	13.2133	-0.670226	K01904 4-coumarate--CoA ligase [EC:6.2.1.12] | (RefSeq) 4-coumarate--CoA ligase-like 9 (A)	ko00130: Ubiquinone and other terpenoid-quinone biosynthesis; ko00940: Phenylpropanoid biosynthesis; ko01100: Metabolic pathways; ko01110: Biosynthesis of secondary metabolites
Solyc06g071030.3	11.16	13.7067	0.296541	K02552 menaquinone-specific isochorismate synthase [EC:5.4.4.2] | (RefSeq) isochorismate synthase (A)	ko00130: Ubiquinone and other terpenoid-quinone biosynthesis; ko01100: Metabolic pathways; ko01110: Biosynthesis of secondary metabolites; ko01240: Biosynthesis of cofactors
Solyc11g069380.2	160.983	149.21	-0.109567	K03526 (E)-4-hydroxy-3-methylbut-2-enyl-diphosphate synthase [EC:1.17.7.1 1.17.7.3] | (RefSeq) HDS; 4-hydroxy-3-methylbut-2-en-1-yl diphosphate synthase (A)	ko00900: Terpenoid backbone biosynthesis; ko01100: Metabolic pathways; ko01110: Biosynthesis of secondary metabolites
Solyc01g109300.3	313.6	265.593	-0.239707	K03527 4-hydroxy-3-methylbut-2-en-1-yl diphosphate reductase [EC:1.17.7.4] | (RefSeq) HDR; 4-hydroxy-3-methylbut-2-enyl diphosphate reductase (A)	ko00900: Terpenoid backbone biosynthesis; ko01100: Metabolic pathways; ko01110: Biosynthesis of secondary metabolites
Solyc02g079750.3	16.75	17.6567	0.0760519	K03809 NAD(P)H dehydrogenase (quinone) [EC:1.6.5.2] | (RefSeq) probable NAD(P)H dehydrogenase (quinone) FQR1-like 1 (A)	ko00130: Ubiquinone and other terpenoid-quinone biosynthesis; ko01100: Metabolic pathways; ko01110: Biosynthesis of secondary metabolites; ko01240: Biosynthesis of cofactors
Solyc03g031440.3	6.61	8.41667	0.348599	K03809 NAD(P)H dehydrogenase (quinone) [EC:1.6.5.2] | (RefSeq) probable NAD(P)H dehydrogenase (quinone) FQR1-like 1 (A)	ko00130: Ubiquinone and other terpenoid-quinone biosynthesis; ko01100: Metabolic pathways; ko01110: Biosynthesis of secondary metabolites; ko01240: Biosynthesis of cofactors
Solyc06g051560.3	0.463333	0.523333	0.17568	K03809 NAD(P)H dehydrogenase (quinone) [EC:1.6.5.2] | (RefSeq) probable NAD(P)H dehydrogenase (quinone) FQR1-like 1 (A)	ko00130: Ubiquinone and other terpenoid-quinone biosynthesis; ko01100: Metabolic pathways; ko01110: Biosynthesis of secondary metabolites; ko01240: Biosynthesis of cofactors
Solyc10g006650.3	38.0233	34.8433	-0.126002	K03809 NAD(P)H dehydrogenase (quinone) [EC:1.6.5.2] | (RefSeq) probable NAD(P)H dehydrogenase (quinone) FQR1-like 1 (A)	ko00130: Ubiquinone and other terpenoid-quinone biosynthesis; ko01100: Metabolic pathways; ko01110: Biosynthesis of secondary metabolites; ko01240: Biosynthesis of cofactors
Solyc01g109400.3	15.6967	15.6333	-0.0058328	K03809 NAD(P)H dehydrogenase (quinone) [EC:1.6.5.2] | (RefSeq) probable NAD(P)H dehydrogenase (quinone) FQR1-like 2 (A)	ko00130: Ubiquinone and other terpenoid-quinone biosynthesis; ko01100: Metabolic pathways; ko01110: Biosynthesis of secondary metabolites; ko01240: Biosynthesis of cofactors
Solyc06g076880.3	13.59	10.2367	-0.408799	K03809 NAD(P)H dehydrogenase (quinone) [EC:1.6.5.2] | (RefSeq) probable NAD(P)H dehydrogenase (quinone) FQR1-like 3 isoform X1 (A)	ko00130: Ubiquinone and other terpenoid-quinone biosynthesis; ko01100: Metabolic pathways; ko01110: Biosynthesis of secondary metabolites; ko01240: Biosynthesis of cofactors
Solyc06g084240.2	0	0.0233333	#DIV/0!	K04120 ent-copalyl diphosphate synthase [EC:5.5.1.13] | (RefSeq) CPS; copalyl diphosphate synthase (A)	ko00904: Diterpenoid biosynthesis; ko01100: Metabolic pathways; ko01110: Biosynthesis of secondary metabolites
Solyc07g066670.3	4.95667	4.84333	-0.0333699	K04121 ent-kaurene synthase [EC:4.2.3.19] | (RefSeq) TPS24; ent-kaurene synthase (A)	ko00904: Diterpenoid biosynthesis; ko01100: Metabolic pathways; ko01110: Biosynthesis of secondary metabolites
Solyc07g066675.1	6.26	5.02333	-0.317518	K04121 ent-kaurene synthase [EC:4.2.3.19] | (RefSeq) TPS24; ent-kaurene synthase (A)	ko00904: Diterpenoid biosynthesis; ko01100: Metabolic pathways; ko01110: Biosynthesis of secondary metabolites
Solyc04g083160.2	0.286667	0.256667	-0.159478	K04122 ent-kaurene oxidase [EC:1.14.14.86] | (RefSeq) ent-kaurene oxidase, chloroplastic isoform X1 (A)	ko00904: Diterpenoid biosynthesis; ko01100: Metabolic pathways; ko01110: Biosynthesis of secondary metabolites
Solyc01g080900.3	0.443333	0.27	-0.715432	K04123 ent-kaurenoic acid monooxygenase [EC:1.14.14.107] | (RefSeq) ent-kaurenoic acid oxidase 2-like isoform X1 (A)	ko00904: Diterpenoid biosynthesis; ko01100: Metabolic pathways; ko01110: Biosynthesis of secondary metabolites
Solyc02g084930.3	6.58667	7.16	0.120411	K04123 ent-kaurenoic acid monooxygenase [EC:1.14.14.107] | (RefSeq) ent-kaurenoic acid oxidase 2-like isoform X1 (A)	ko00904: Diterpenoid biosynthesis; ko01100: Metabolic pathways; ko01110: Biosynthesis of secondary metabolites
Solyc08g007050.2	0.0266667	0.173333	2.70044	K04123 ent-kaurenoic acid monooxygenase [EC:1.14.14.107] | (RefSeq) ent-kaurenoic acid oxidase 2-like isoform X1 (A)	ko00904: Diterpenoid biosynthesis; ko01100: Metabolic pathways; ko01110: Biosynthesis of secondary metabolites
Solyc12g006460.2	192.807	148.18	-0.379804	K04123 ent-kaurenoic acid monooxygenase [EC:1.14.14.107] | (RefSeq) ent-kaurenoic acid oxidase 2-like isoform X1 (A)	ko00904: Diterpenoid biosynthesis; ko01100: Metabolic pathways; ko01110: Biosynthesis of secondary metabolites
Solyc06g066820.3	0.0133333	0.04	1.58496	K04124 gibberellin 3beta-dioxygenase [EC:1.14.11.15] | (RefSeq) 3OH-1; Gibberellin 3-beta-hydroxylase 1 (A)	ko00904: Diterpenoid biosynthesis; ko01100: Metabolic pathways; ko01110: Biosynthesis of secondary metabolites
Solyc03g119910.3	0.143333	0.326667	1.18845	K04124 gibberellin 3beta-dioxygenase [EC:1.14.11.15] | (RefSeq) 3OH-2; 3b-hydroxylase (A)	ko00904: Diterpenoid biosynthesis; ko01100: Metabolic pathways; ko01110: Biosynthesis of secondary metabolites
Solyc01g058250.2	0.563333	0.293333	-0.941448	K04124 gibberellin 3beta-dioxygenase [EC:1.14.11.15] | (RefSeq) gibberellin 3-beta-dioxygenase 1-like (A)	ko00904: Diterpenoid biosynthesis; ko01100: Metabolic pathways; ko01110: Biosynthesis of secondary metabolites
Solyc03g116280.3	1.12333	1.40667	0.324494	K04124 gibberellin 3beta-dioxygenase [EC:1.14.11.15] | (RefSeq) gibberellin 3-beta-dioxygenase 1-like (A)	ko00904: Diterpenoid biosynthesis; ko01100: Metabolic pathways; ko01110: Biosynthesis of secondary metabolites
Solyc05g018125.1	8.22	8.65667	0.0746732	K04124 gibberellin 3beta-dioxygenase [EC:1.14.11.15] | (RefSeq) gibberellin 3-beta-dioxygenase 1-like (A)	ko00904: Diterpenoid biosynthesis; ko01100: Metabolic pathways; ko01110: Biosynthesis of secondary metabolites
Solyc07g056670.3	0.136667	0.143333	0.0687128	K04125 gibberellin 2beta-dioxygenase [EC:1.14.11.13] | (RefSeq) GA2ox2; gibberellin 2-oxidase 2 (A)	ko00904: Diterpenoid biosynthesis; ko01110: Biosynthesis of secondary metabolites
Solyc01g079200.3	9.88667	8.02667	-0.300683	K04125 gibberellin 2beta-dioxygenase [EC:1.14.11.13] | (RefSeq) GA2ox3; gibberellin 2-oxidase (A)	ko00904: Diterpenoid biosynthesis; ko01110: Biosynthesis of secondary metabolites
Solyc07g061720.3	0.41	0.443333	0.112768	K04125 gibberellin 2beta-dioxygenase [EC:1.14.11.13] | (RefSeq) GA2ox4; gibberellin 2-oxidase (A)	ko00904: Diterpenoid biosynthesis; ko01110: Biosynthesis of secondary metabolites
[truncated: 445 more rows]
